# Supplementary material for: Single cell transcriptome atlas of the Drosophila larval brain
Source: eLife journal article supplement (doi:10.7554/elife.50354), 2019-11-20

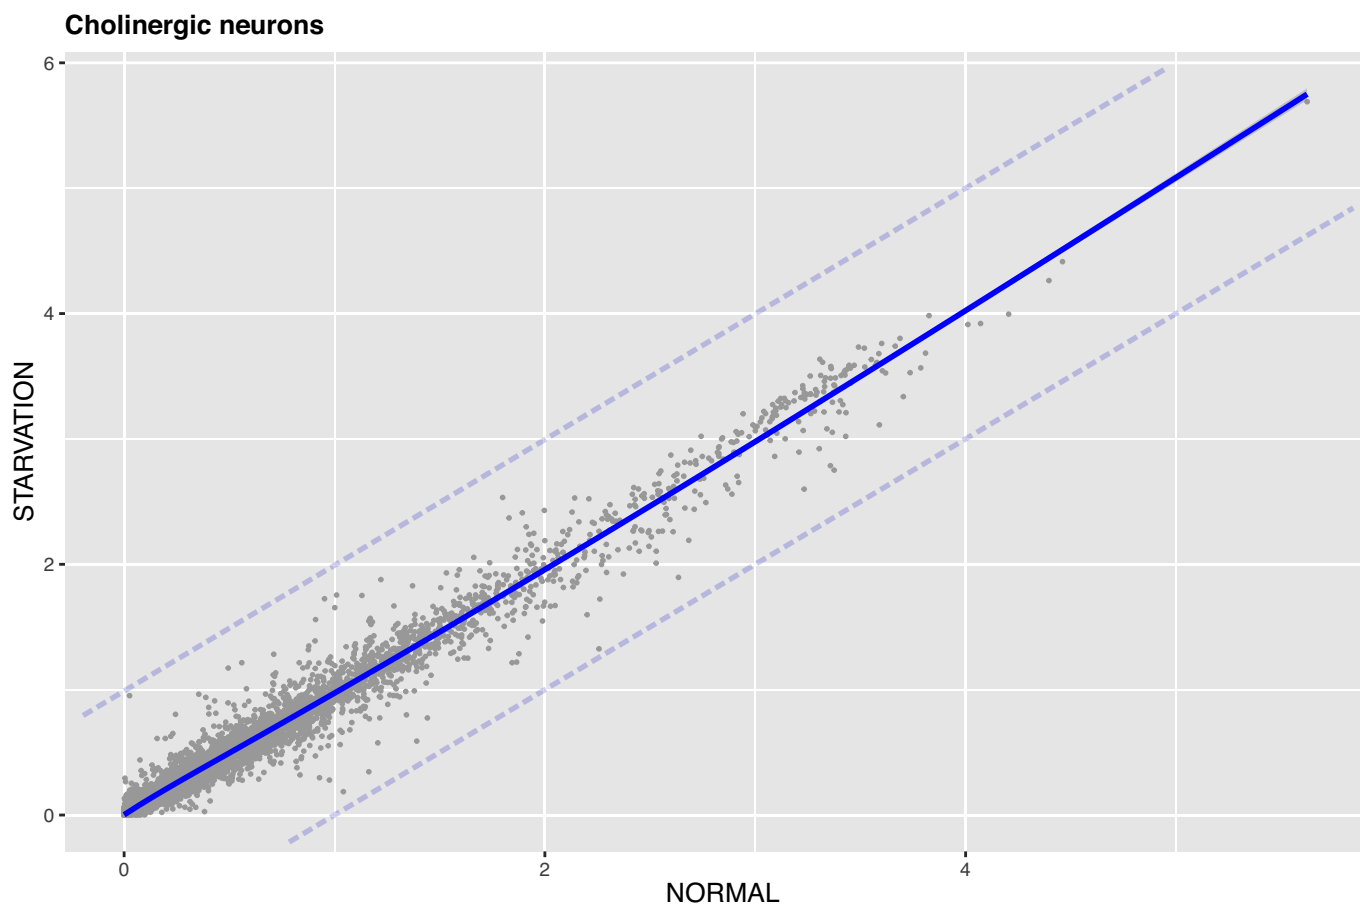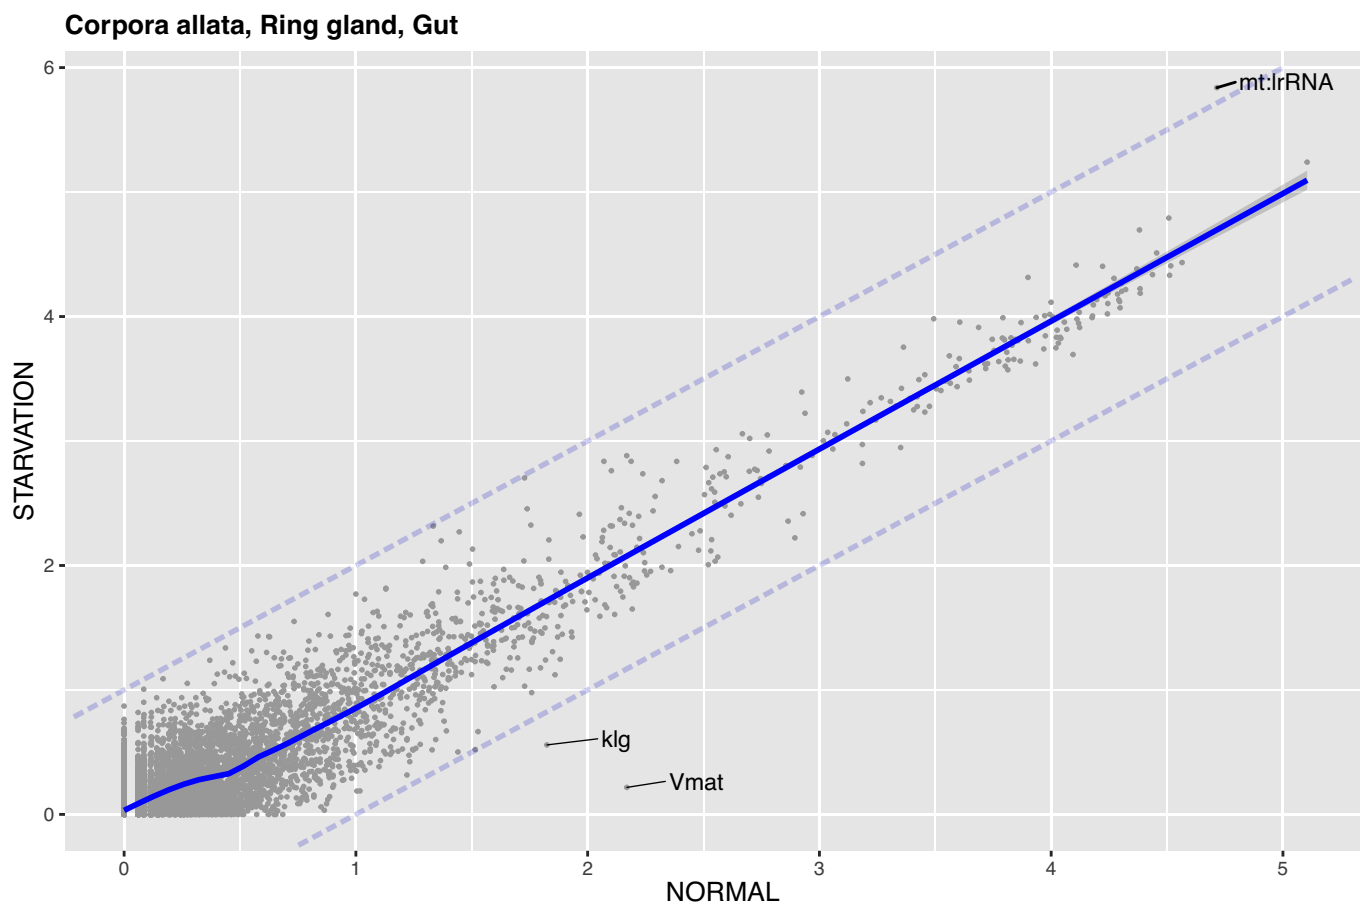

### GABAergic neurons

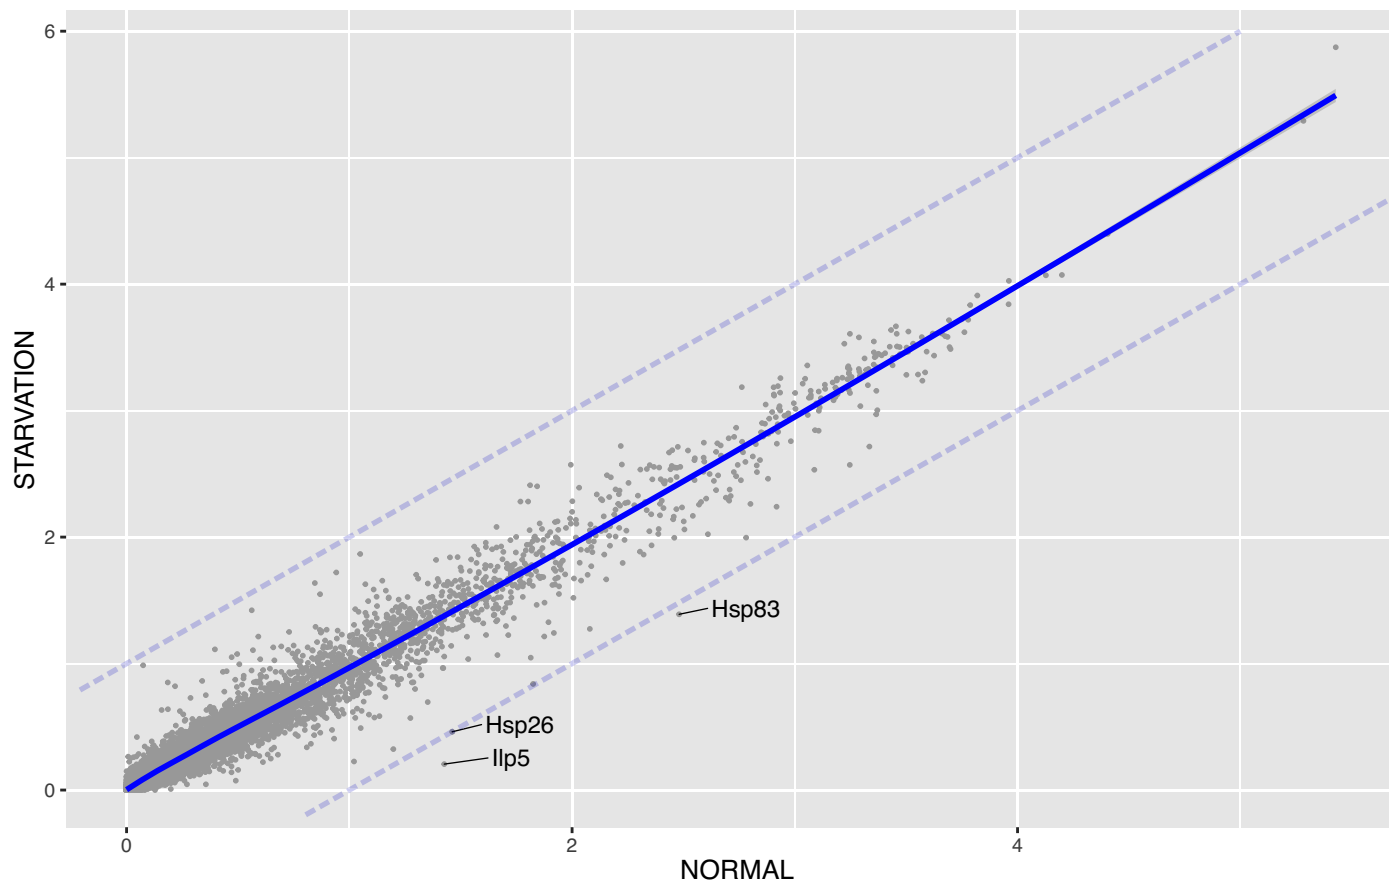

### Glial cells

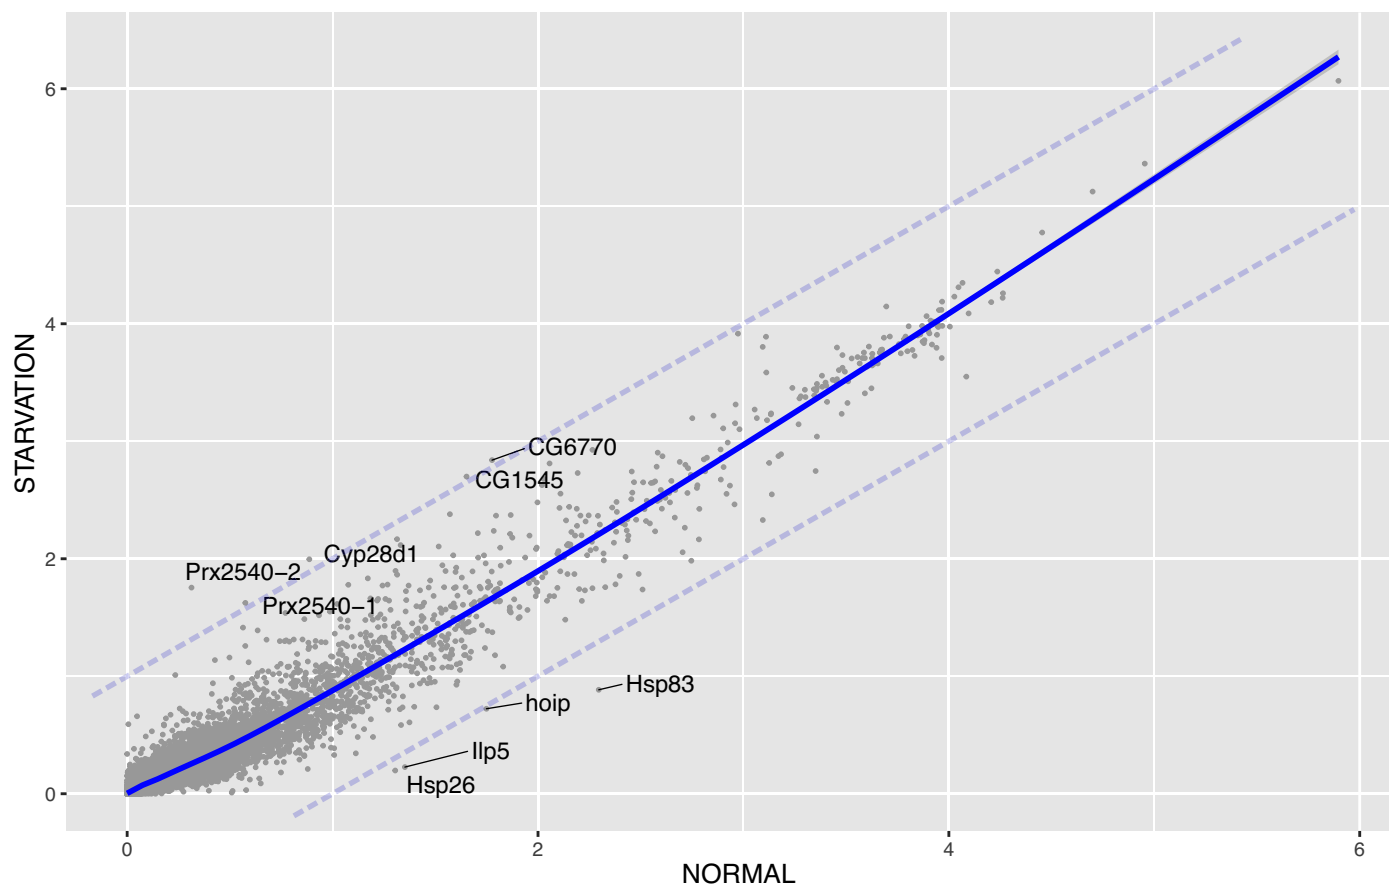

### Glutamatergic neurons

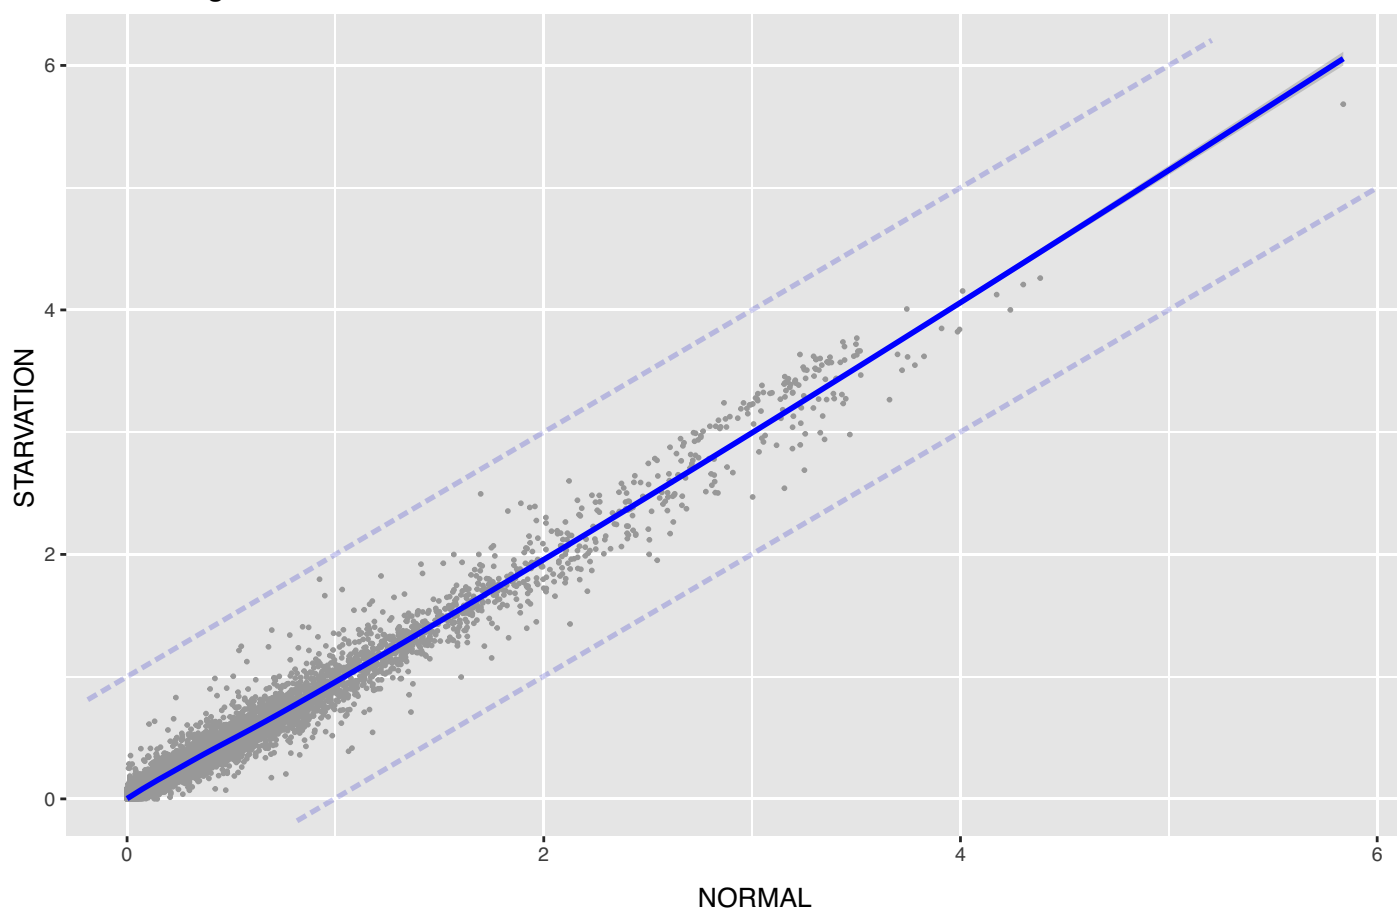

### Hemocytes

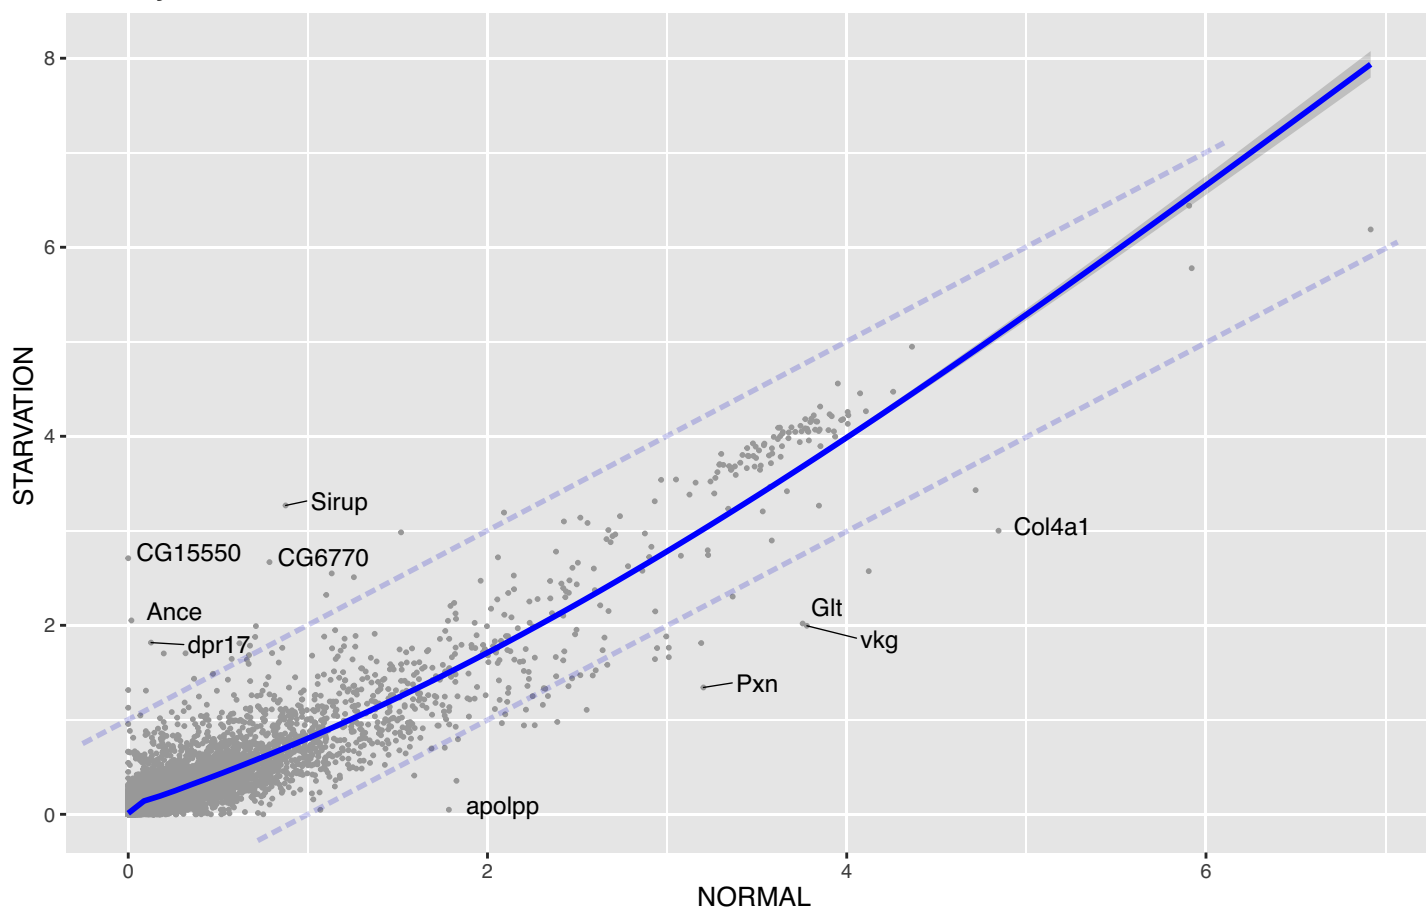

### Monoaminergic neurons

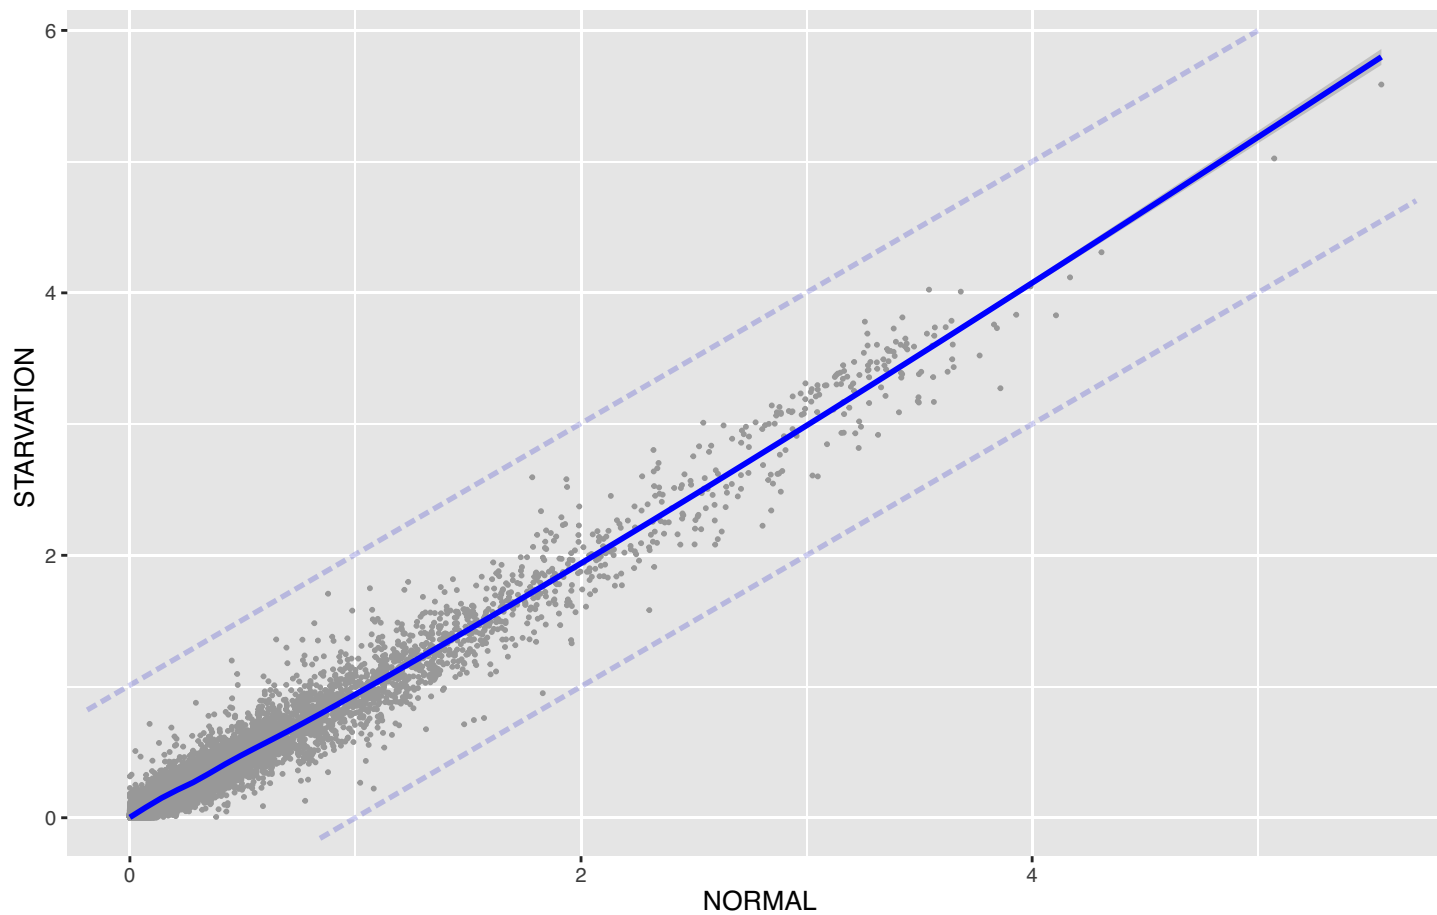

### Muscle cells

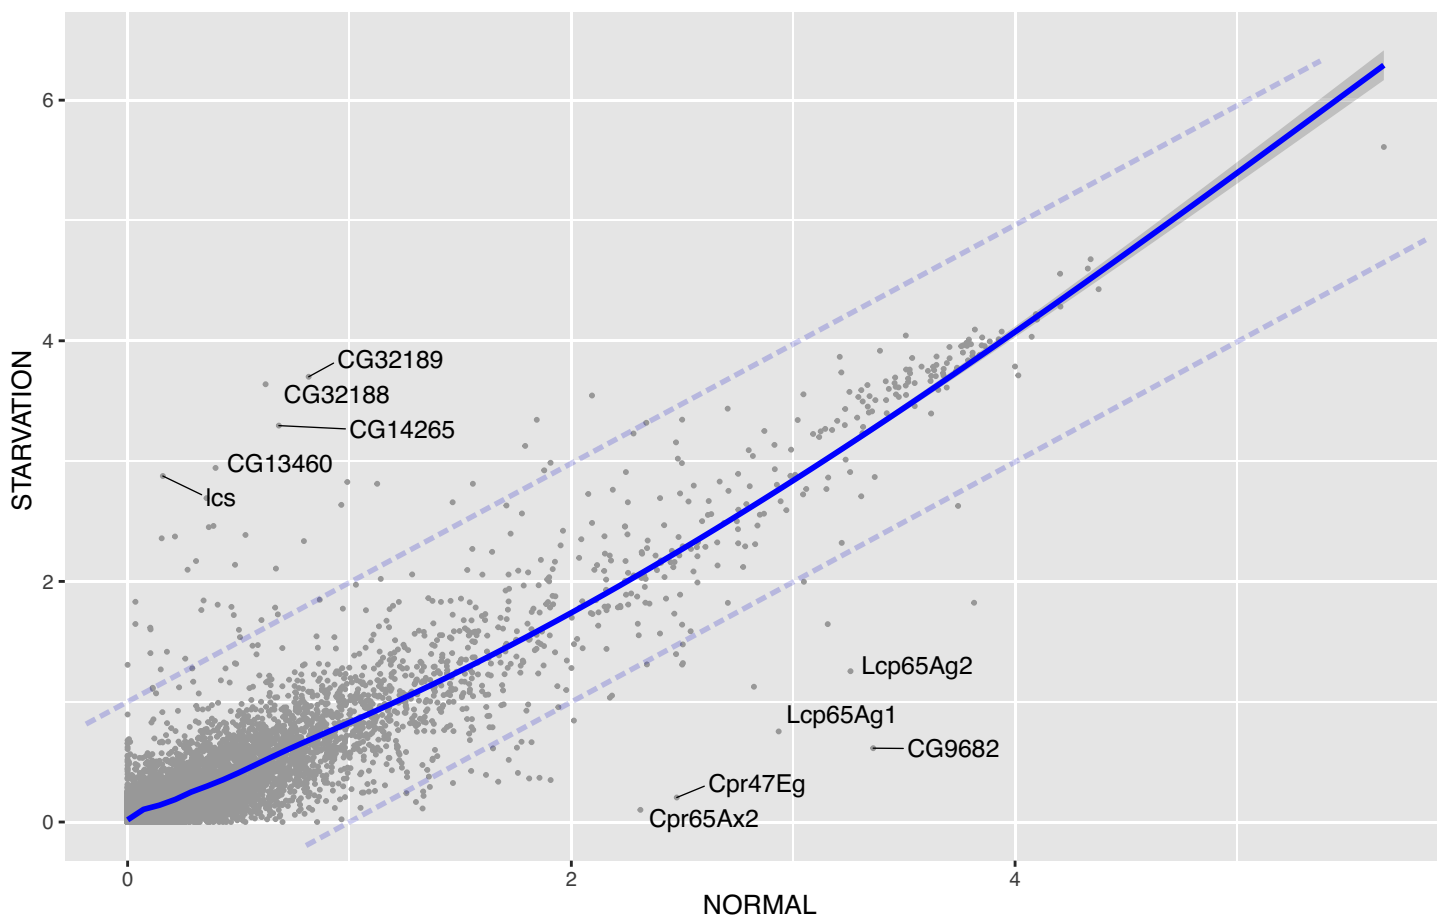

Neurons X

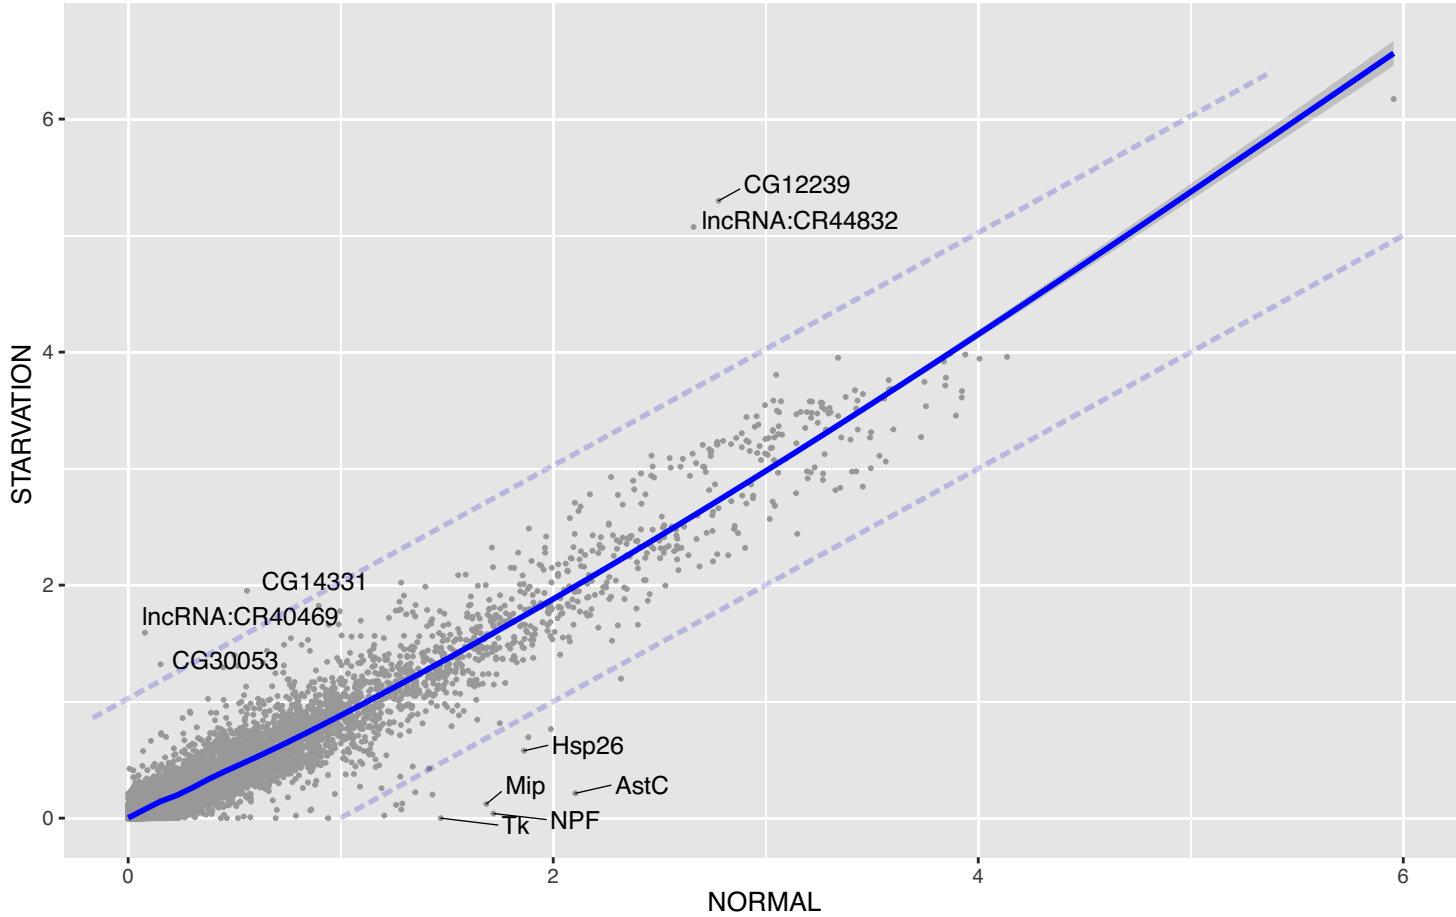

Neuropeptidergic cells

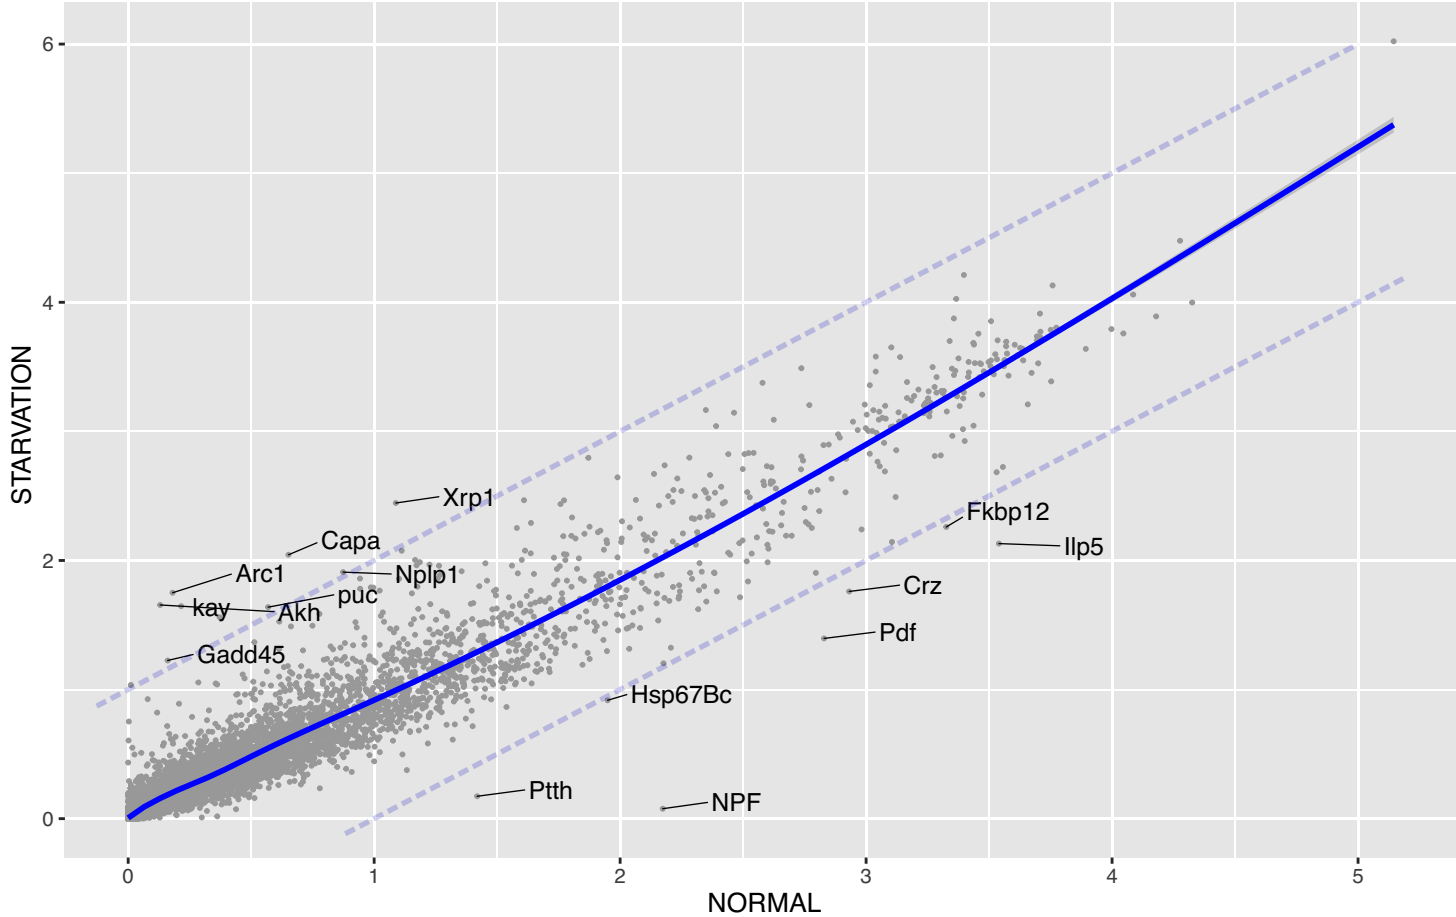

Neural Progenitor Cells - Neuroblasts

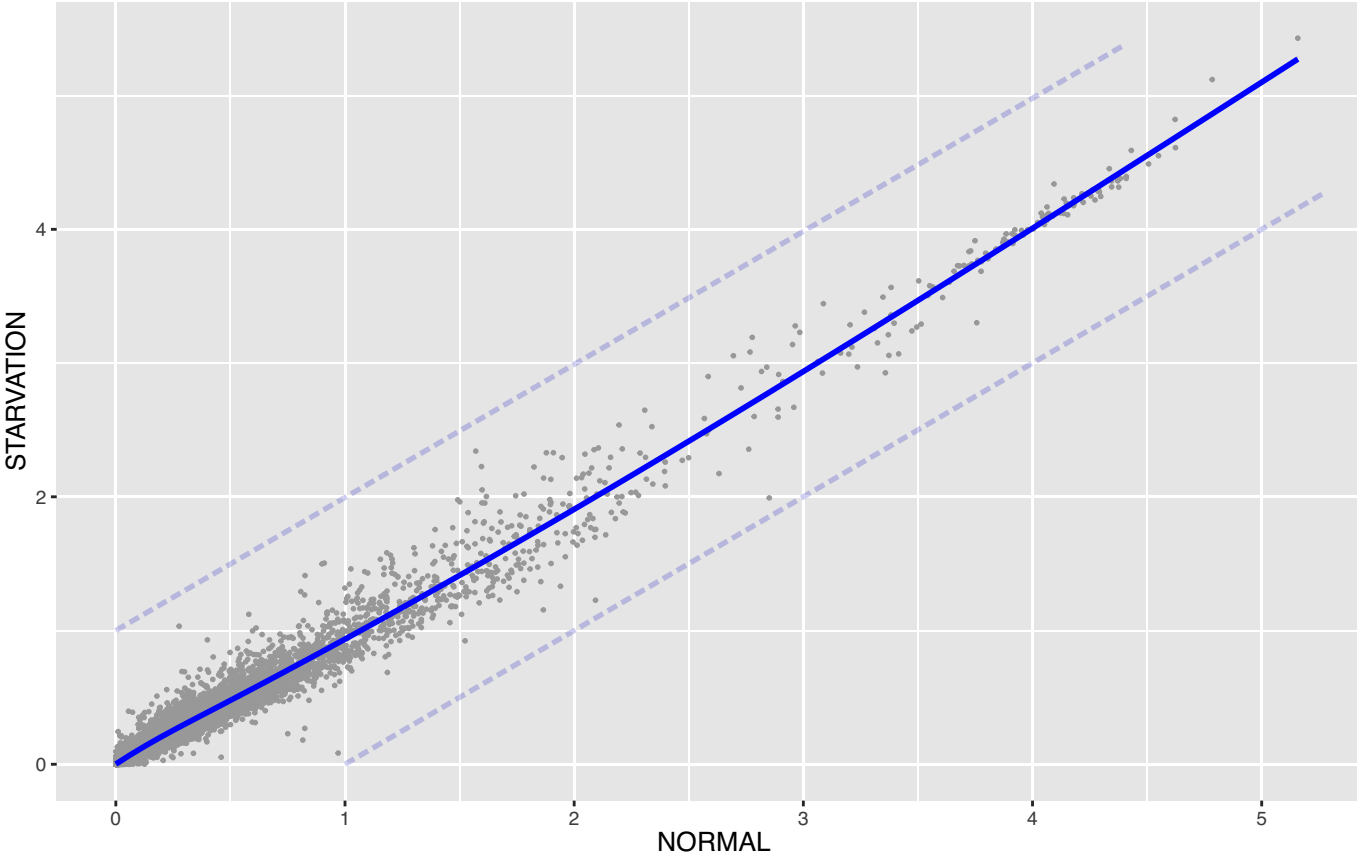

Optic Lobe Epithelium

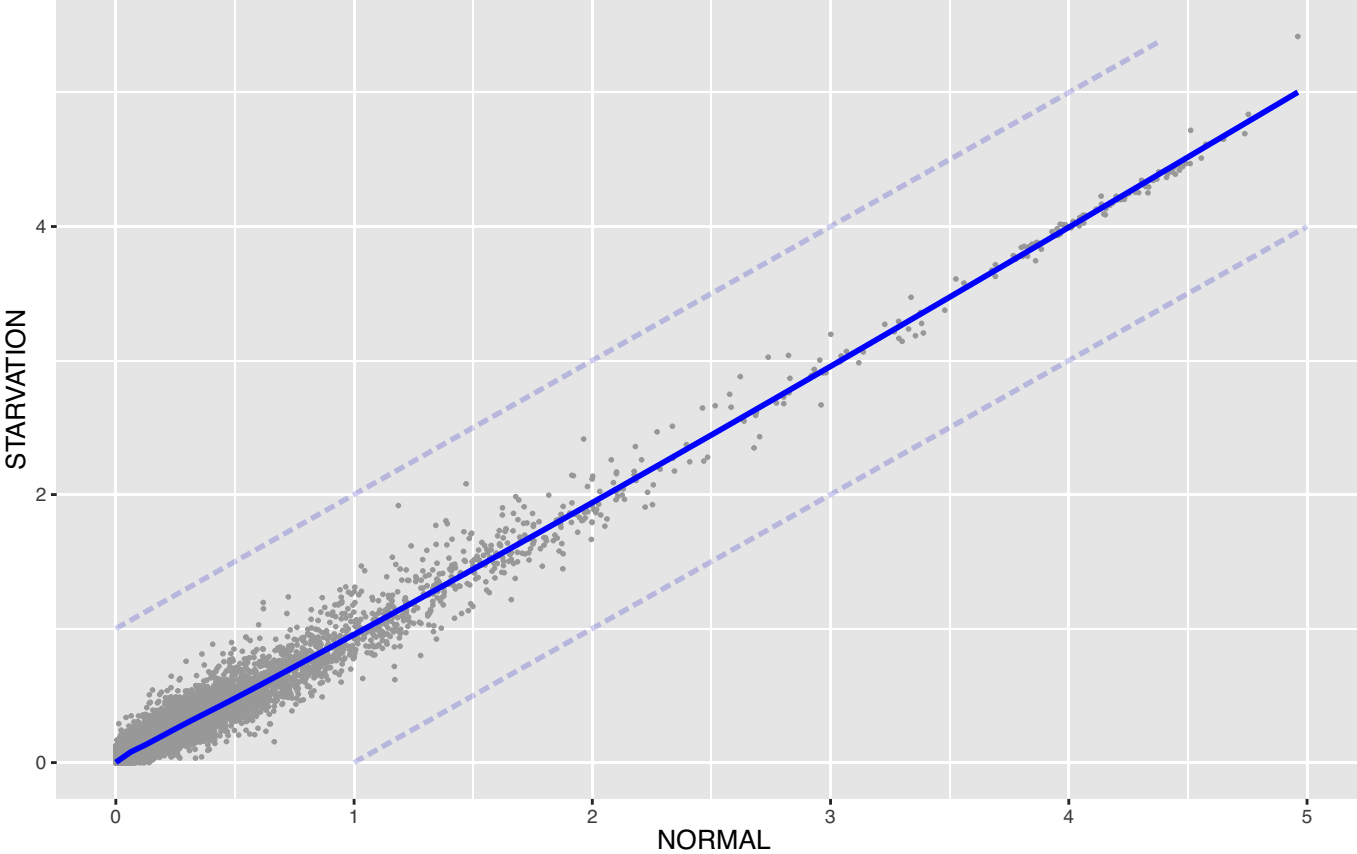

### Prothoracic gland

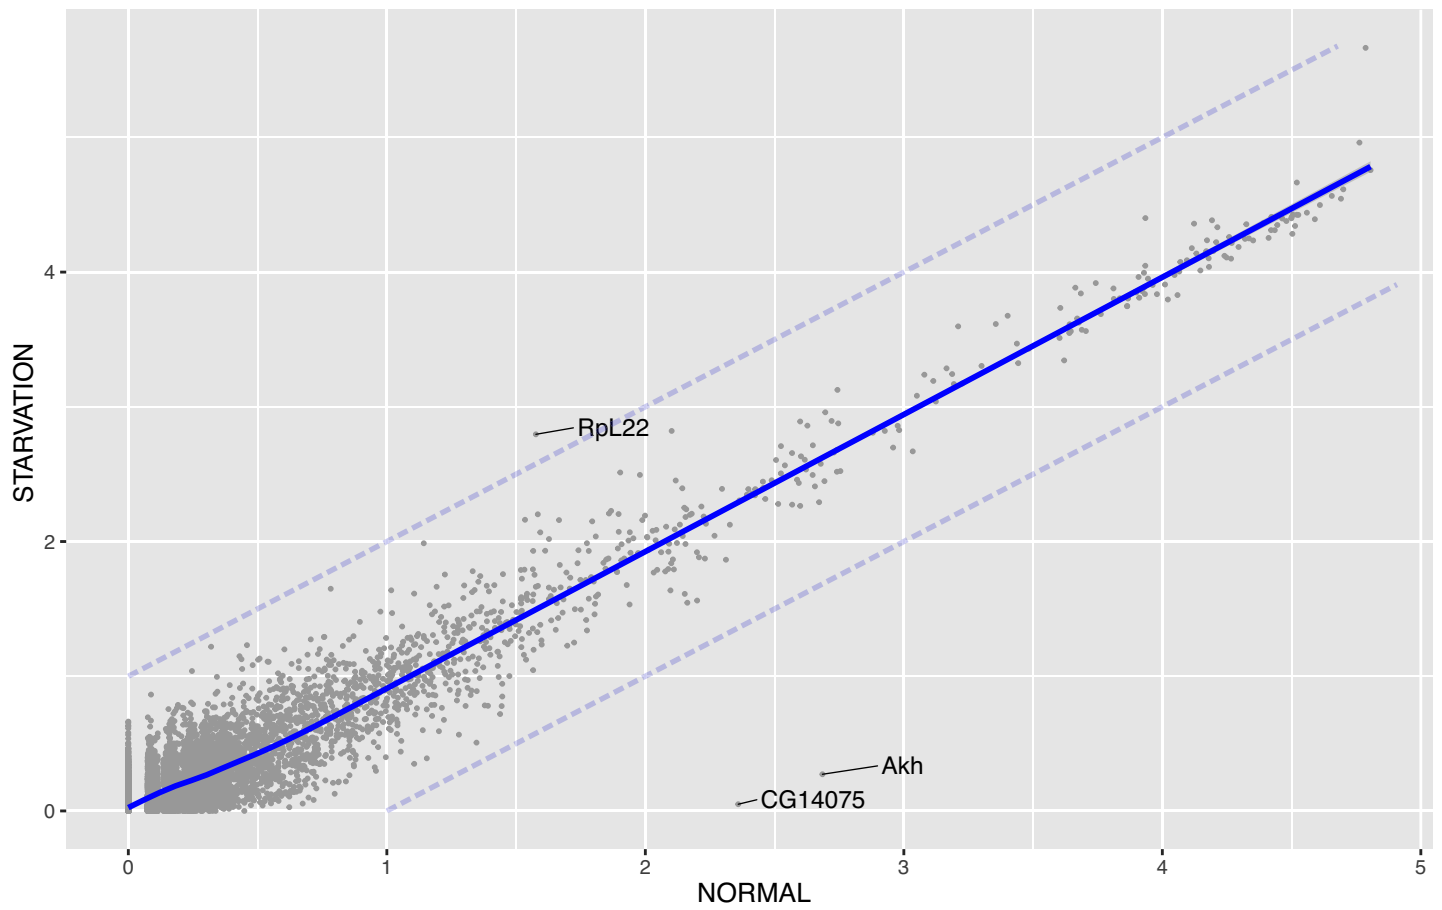

### Undifferentiated neurons 1

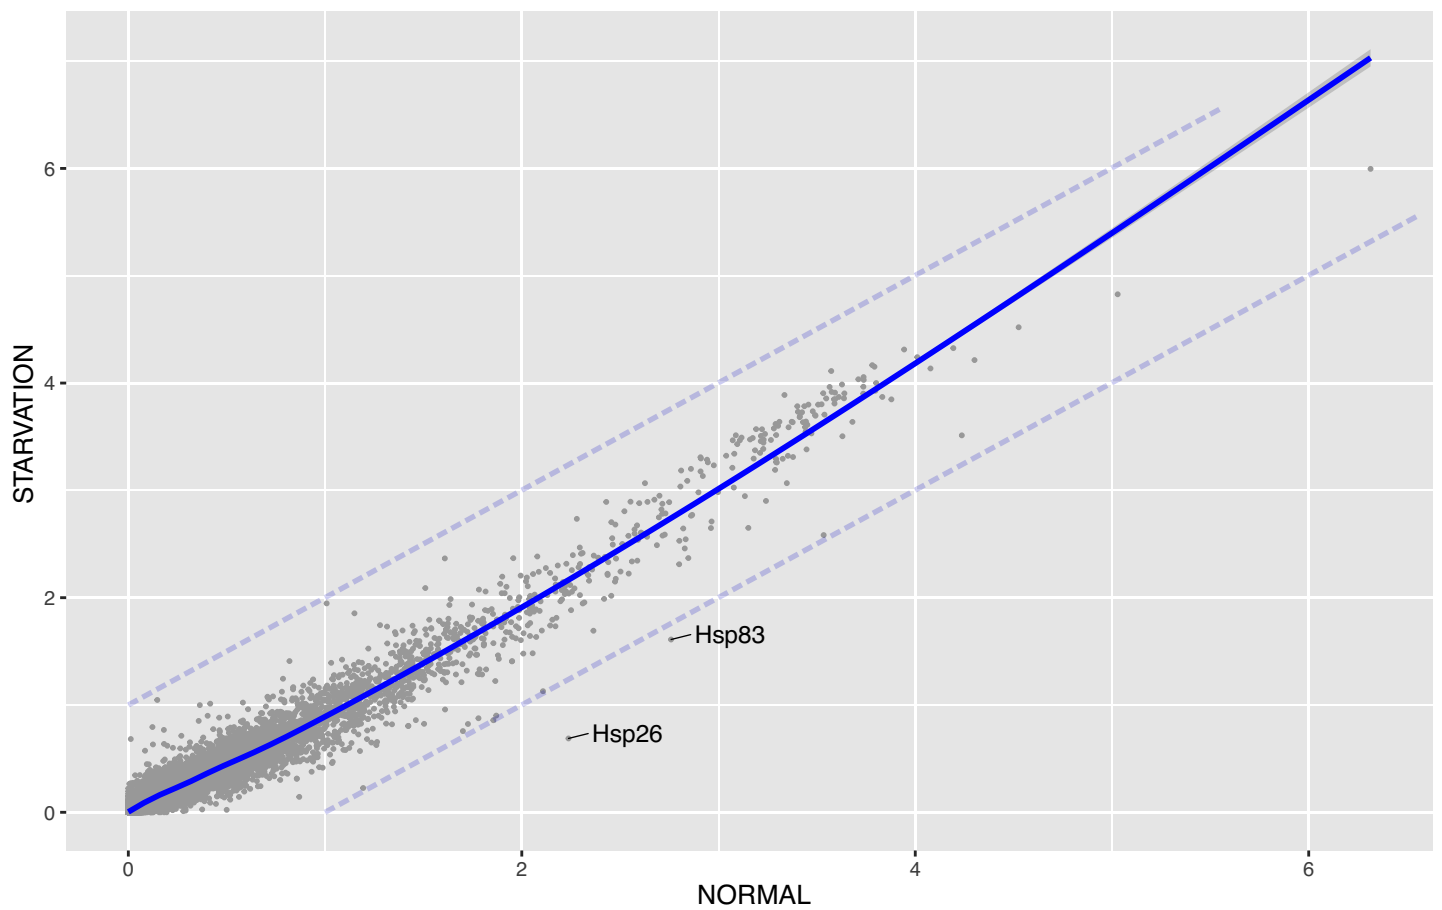

C32

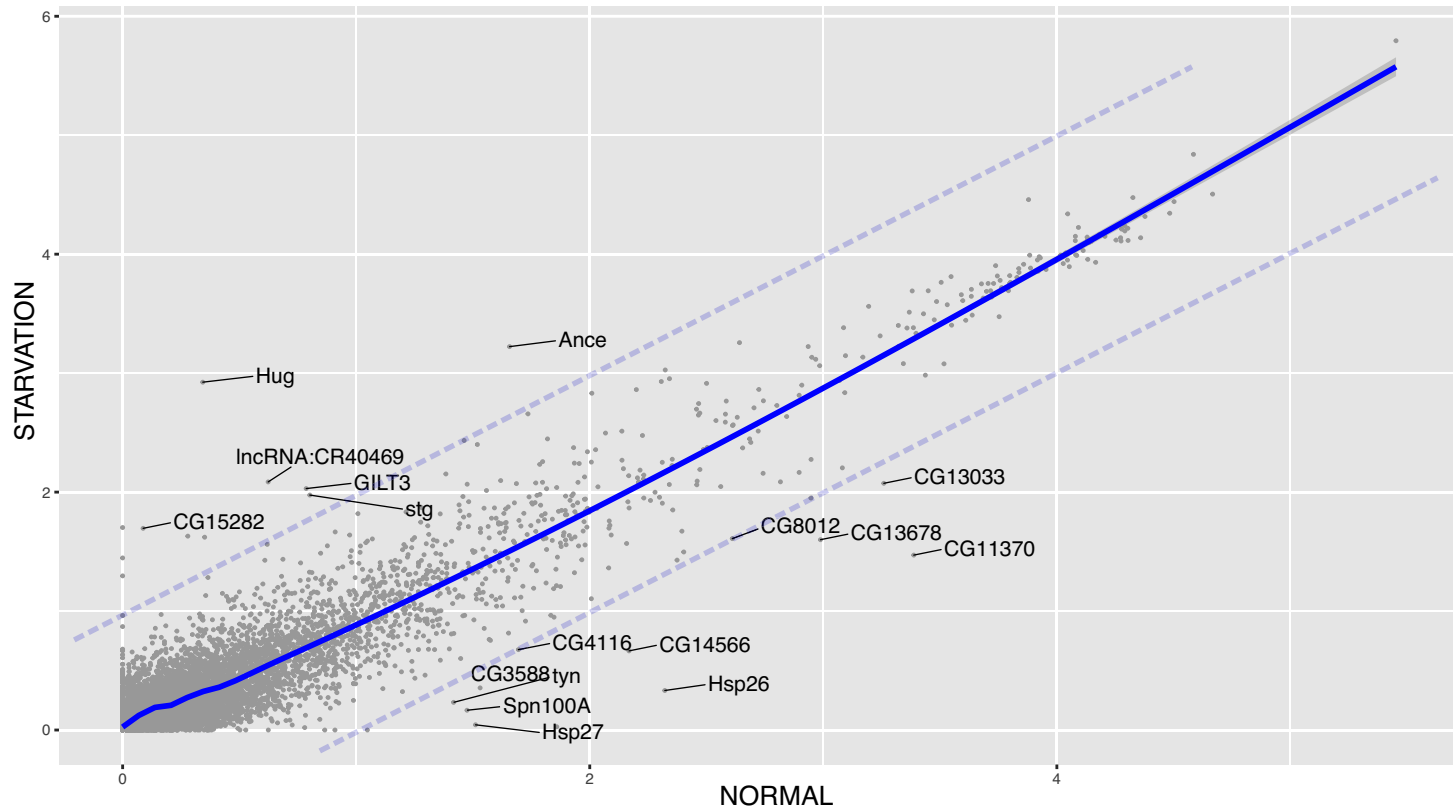

Supplement: supp [file elife-50354-supp-v1.zip › elife_poa_e50354_Supplementary_file_2.pdf]
