# Supplementary material for: Single cell transcriptome atlas of the Drosophila larval brain
Source: eLife journal article supplement (doi:10.7554/elife.50354), 2019-11-20

## Normal

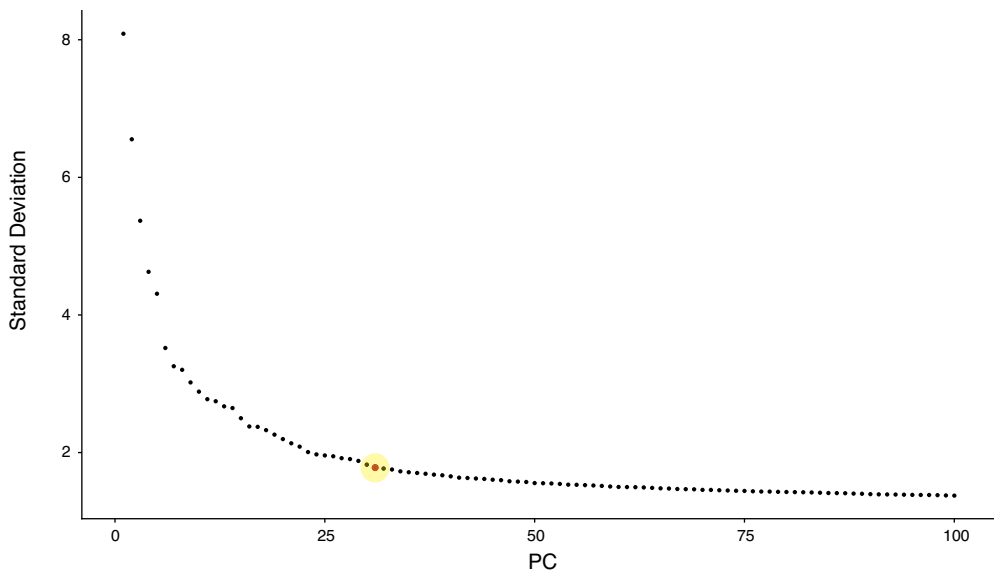

## Starvation

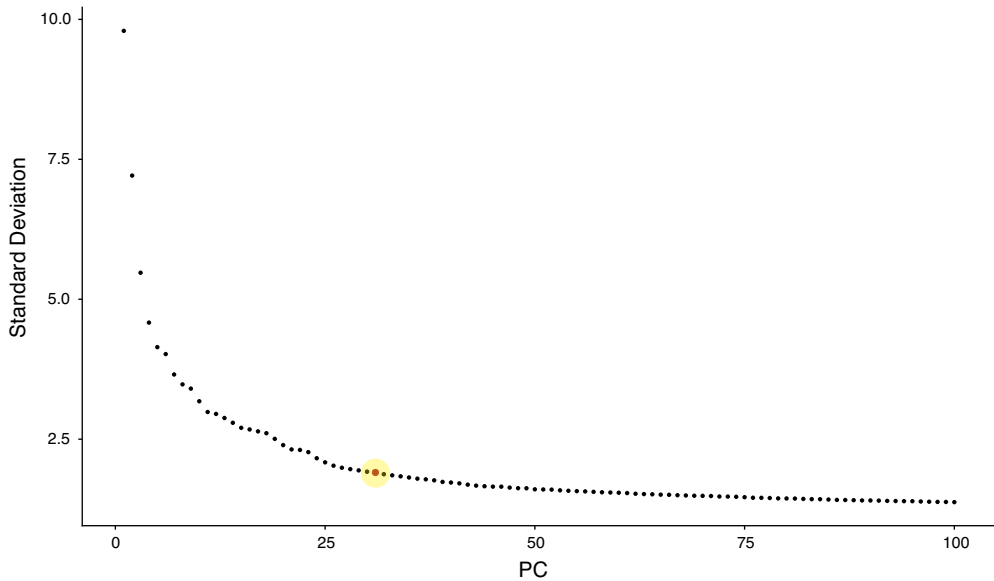

Supplement: supp [file elife-50354-supp-v1.zip]
