# Supplementary material for: Single cell transcriptome atlas of the Drosophila larval brain
Source: eLife journal article supplement (doi:10.7554/elife.50354), 2019-11-20
Supplement: supp [file elife-50354-supp-v1.zip]

Archive with 17 entries (17 files):
- elife_poa_e50354_Supplementary_file_3.pdf
- elife_poa_e50354_Figure_2_figure_supplement_1.pdf
- elife_poa_e50354_Figure_8_figure_supplement_1.pdf
- elife_poa_e50354_Figure_1_source_data_1.xlsx
- elife_poa_e50354_Figure_1_figure_supplement_1.pdf
- elife_poa_e50354_Figure_3_figure_supplement_2.pdf
- elife_poa_e50354_Figure_1_figure_supplement_2.pdf
- elife_poa_e50354_Figure_7_source_data_1.xlsx
- elife_poa_e50354_Figure_2_figure_supplement_2.pdf
- elife_poa_e50354_Figure_7_figure_supplement_3.pdf
- elife_poa_e50354_Supplementary_file_2.pdf
- elife_poa_e50354_Figure_7_figure_supplement_1.pdf
- elife_poa_e50354_Supplementary_file_1.xlsx
- elife_poa_e50354_Figure_7_figure_supplement_2.pdf
- elife_poa_e50354_Figure_3_figure_supplement_1.pdf
- elife_poa_e50354_Transparent_Reporting_File.pdf
- elife_poa_e50354_Supplementary_file_2_source_data_1.xlsx
