# Supplementary material for: Single cell transcriptome atlas of the Drosophila larval brain
Source: eLife journal article supplement (doi:10.7554/elife.50354), 2019-11-20
Supplement: supp [file elife-50354-supp-v1.zip › elife_poa_e50354_Figure_1_source_data_1.xlsx]

## Sheet: Cluster Annotation
Number	p_val	avg_logFC	pct.1	pct.2	p_val_adj	cluster	gene	Cluster ID
1	3.89096e-97	0.714307	0.992	0.657	5.03568e-93	0	futsch	Cholinergic neurons 1
2	8.24131e-80	0.621959	0.985	0.675	1.06659e-75	0	Galphao	Cholinergic neurons 1
3	2.41477e-74	0.593681	0.952	0.558	3.1252e-70	0	CG43222	Cholinergic neurons 1
4	6.06589e-74	0.614028	0.98	0.677	7.85047e-70	0	CaMKII	Cholinergic neurons 1
5	1.12919e-71	0.636357	0.99	0.68	1.46139e-67	0	Hex-A	Cholinergic neurons 1
6	6.66773e-53	1.29541	0.447	0.138	8.62937e-49	0	Dsk	Cholinergic neurons 1
7	1.15488e-46	0.914555	0.915	0.657	1.49464e-42	0	CG31221	Cholinergic neurons 1
8	2.69947e-35	0.616402	0.575	0.277	3.49365e-31	0	beat-Ic	Cholinergic neurons 1
9	4.81884e-11	1.07496	0.905	0.567	6.23654e-07	0	Ms	Cholinergic neurons 1
10	1.92527e-06	0.645161	0.382	0.26	0.0249169	0	AstC	Cholinergic neurons 1
Number	p_val	avg_logFC	pct.1	pct.2	p_val_adj	cluster	gene	Cluster ID
11	4.02957e-97	1.12679	0.954	0.77	5.21507e-93	1	nAChRalpha6	Cholinergic neurons 2
12	1.43143e-80	1.26647	0.885	0.677	1.85256e-76	1	Cngl	Cholinergic neurons 2
13	6.78098e-70	1.04697	0.773	0.563	8.77595e-66	1	mmd	Cholinergic neurons 2
14	8.40853e-69	1.08799	0.855	0.633	1.08823e-64	1	jeb	Cholinergic neurons 2
15	7.17437e-40	1.15713	0.717	0.562	9.28507e-36	1	luna	Cholinergic neurons 2
16	5.95556e-39	1.33627	0.592	0.375	7.70768e-35	1	shakB	Cholinergic neurons 2
17	8.25151e-37	1.08055	0.73	0.572	1.06791e-32	1	klg	Cholinergic neurons 2
18	5.74658e-32	1.09897	0.74	0.644	7.43723e-28	1	mbl	Cholinergic neurons 2
19	1.90602e-26	1.08089	0.515	0.371	2.46677e-22	1	nAChRalpha7	Cholinergic neurons 2
20	3.43828e-22	1.1256	0.474	0.351	4.44982e-18	1	Hr4	Cholinergic neurons 2
Number	p_val	avg_logFC	pct.1	pct.2	p_val_adj	cluster	gene	Cluster ID
21	3.22991e-149	1.01656	0.935	0.327	4.18015e-145	2	ChAT	Cholinergic neurons 3
22	1.01056e-142	0.973093	0.955	0.357	1.30787e-138	2	VAChT	Cholinergic neurons 3
23	7.72331e-128	0.904992	1	0.949	9.99551e-124	2	Cam	Cholinergic neurons 3
24	1.104e-113	0.914156	0.895	0.39	1.4288e-109	2	CG14762	Cholinergic neurons 3
25	3.78699e-106	1.2279	0.958	0.653	4.90113e-102	2	CG31221	Cholinergic neurons 3
26	3.71593e-87	0.793658	0.919	0.488	4.80916e-83	2	Ace	Cholinergic neurons 3
27	4.61383e-78	0.812123	0.743	0.303	5.97122e-74	2	beat-VII	Cholinergic neurons 3
28	2.22507e-69	1.10714	0.859	0.517	2.87968e-65	2	trv	Cholinergic neurons 3
29	3.3674e-45	0.885131	0.579	0.259	4.35809e-41	2	spab	Cholinergic neurons 3
30	5.60198e-34	0.985759	0.843	0.617	7.25008e-30	2	heph	Cholinergic neurons 3
Number	p_val	avg_logFC	pct.1	pct.2	p_val_adj	cluster	gene	Cluster ID
31	7.97429e-222	2.67687	0.997	0.611	1.03203e-217	3	hdc	Undifferentiated neurons 1
32	1.09165e-203	2.2489	0.995	0.725	1.41281e-199	3	scyl	Undifferentiated neurons 1
33	2.57396e-164	1.71166	0.949	0.489	3.33122e-160	3	Thor	Undifferentiated neurons 1
34	5.98435e-154	1.45579	0.992	0.909	7.74494e-150	3	lncRNA:Hsromega	Undifferentiated neurons 1
35	3.10232e-152	1.61154	0.894	0.498	4.01502e-148	3	unk	Undifferentiated neurons 1
36	6.85125e-147	1.47345	0.924	0.602	8.86689e-143	3	REPTOR-BP	Undifferentiated neurons 1
37	9.23831e-127	1.48773	0.683	0.215	1.19562e-122	3	CBP	Undifferentiated neurons 1
38	2.47817e-125	1.56996	0.816	0.368	3.20724e-121	3	hig	Undifferentiated neurons 1
39	2.79979e-124	1.42838	0.856	0.497	3.62349e-120	3	REPTOR	Undifferentiated neurons 1
40	4.56494e-119	1.58778	0.778	0.375	5.90795e-115	3	Mnn1	Undifferentiated neurons 1
Number	p_val	avg_logFC	pct.1	pct.2	p_val_adj	cluster	gene	Cluster ID
41	2.20147e-69	0.776652	1	0.95	2.84914e-65	4	Cam	Cholinergic neurons 4
42	2.8993e-63	0.727962	0.99	0.961	3.75228e-59	4	Ald	Cholinergic neurons 4
43	5.81972e-55	0.667677	0.973	0.85	7.53189e-51	4	miple1	Cholinergic neurons 4
44	5.13645e-51	0.658931	0.973	0.92	6.6476e-47	4	Gapdh1	Cholinergic neurons 4
45	7.69786e-49	0.659044	0.98	0.866	9.96258e-45	4	Pglym78	Cholinergic neurons 4
46	9.38634e-37	1.01824	0.146	0.63	1.21478e-32	4	Ms	Cholinergic neurons 4
47	2.7038e-24	0.663499	0.736	0.64	3.49926e-20	4	jim	Cholinergic neurons 4
48	4.18117e-19	0.696743	0.651	0.558	5.41127e-15	4	CG11000	Cholinergic neurons 4
49	2.39979e-16	1.18833	0.085	0.346	3.1058e-12	4	SIFa	Cholinergic neurons 4
50	9.33526e-06	0.862934	0.407	0.745	0.120817	4	CG14989	Cholinergic neurons 4
Number	p_val	avg_logFC	pct.1	pct.2	p_val_adj	cluster	gene	Cluster ID
51	3.64284e-83	1.00135	0.954	0.504	4.71456e-79	5	CG32017	Glutamatergic/GABAergic neurons
52	1.77046e-60	0.957665	0.985	0.709	2.29133e-56	5	Rbp6	Glutamatergic/GABAergic neurons
53	6.54749e-56	0.99143	0.576	0.192	8.47376e-52	5	Nplp1	Glutamatergic/GABAergic neurons
54	5.46232e-43	1.53946	0.569	0.268	7.06934e-39	5	Gad1	Glutamatergic/GABAergic neurons
55	2.7422e-34	0.839287	0.672	0.343	3.54895e-30	5	beat-VI	Glutamatergic/GABAergic neurons
56	1.92404e-25	1.03743	0.779	0.544	2.4901e-21	5	VGlut	Glutamatergic/GABAergic neurons
57	9.97964e-25	1.43486	0.332	0.121	1.29157e-20	5	CG6006	Glutamatergic/GABAergic neurons
58	2.61461e-16	1.51322	0.824	0.716	3.38383e-12	5	CG14989	Glutamatergic/GABAergic neurons
59	1.28999e-11	0.856358	0.282	0.147	1.66951e-07	5	D	Glutamatergic/GABAergic neurons
60	1.22636e-05	0.912471	0.256	0.161	0.158715	5	Proc	Glutamatergic/GABAergic neurons
Number	p_val	avg_logFC	pct.1	pct.2	p_val_adj	cluster	gene	Cluster ID
61	1.09148e-129	0.674111	0.768	0.143	1.41259e-125	6	CG14423	Cholinergic neurons 5
62	5.73353e-91	2.24375	0.838	0.291	7.42033e-87	6	lncRNA:CR44832	Cholinergic neurons 5
63	1.05444e-78	2.45273	0.73	0.231	1.36466e-74	6	CG12239	Cholinergic neurons 5
64	1.2841e-37	1.27213	0.402	0.123	1.66189e-33	6	Mip	Cholinergic neurons 5
65	5.91413e-37	1.01538	0.506	0.194	7.65406e-33	6	NPF	Cholinergic neurons 5
66	7.26179e-31	0.605932	0.958	0.637	9.39821e-27	6	CG2269	Cholinergic neurons 5
67	1.24925e-25	0.624745	0.656	0.347	1.61678e-21	6	Dh31	Cholinergic neurons 5
68	4.2861e-23	0.606109	0.915	0.665	5.54707e-19	6	CG31221	Cholinergic neurons 5
69	9.33104e-22	0.641537	0.591	0.32	1.20762e-17	6	Ddc	Cholinergic neurons 5
70	1.40919e-19	0.68208	0.266	0.093	1.82377e-15	6	Tk	Cholinergic neurons 5
Number	p_val	avg_logFC	pct.1	pct.2	p_val_adj	cluster	gene	Cluster ID
71	2.19685e-111	0.99733	1	0.981	2.84317e-107	7	RpL21	Neural progenitor cells 1
72	2.57617e-97	1.50105	0.73	0.228	3.33408e-93	7	CG42566	Neural progenitor cells 1
73	3.03197e-94	1.07018	0.983	0.848	3.92398e-90	7	eEF1beta	Neural progenitor cells 1
74	4.35686e-84	1.4617	0.794	0.34	5.63865e-80	7	CG4250	Neural progenitor cells 1
75	4.99787e-74	1.65713	0.755	0.344	6.46825e-70	7	CG44325	Neural progenitor cells 1
76	2.99449e-69	1.21438	0.695	0.259	3.87547e-65	7	CG1572	Neural progenitor cells 1
77	2.83417e-67	1.13915	0.506	0.132	3.66798e-63	7	CG17265	Neural progenitor cells 1
78	4.00583e-46	0.991941	0.524	0.189	5.18435e-42	7	klu	Neural progenitor cells 1
79	7.79764e-39	1.05861	0.721	0.541	1.00917e-34	7	Prosbeta3	Neural progenitor cells 1
80	2.21182e-34	1.03937	0.455	0.189	2.86253e-30	7	ash2	Neural progenitor cells 1
Number	p_val	avg_logFC	pct.1	pct.2	p_val_adj	cluster	gene	Cluster ID
81	8.01717e-91	1.81001	0.595	0.142	1.03758e-86	8	Hsp70Bc	Undifferentiated neurons 2
82	7.70289e-88	1.93082	0.7	0.227	9.96908e-84	8	Hsp68	Undifferentiated neurons 2
83	1.67269e-77	1.28351	0.943	0.627	2.1648e-73	8	hdc	Undifferentiated neurons 2
84	3.08535e-53	1.7921	0.824	0.62	3.99306e-49	8	Hsp26	Undifferentiated neurons 2
85	5.34345e-51	0.947305	0.903	0.739	6.9155e-47	8	scyl	Undifferentiated neurons 2
86	1.55475e-42	1.08505	0.925	0.916	2.01216e-38	8	lncRNA:Hsromega	Undifferentiated neurons 2
87	1.35298e-30	0.861705	0.727	0.516	1.75103e-26	8	REPTOR	Undifferentiated neurons 2
88	8.74066e-28	0.911335	0.626	0.397	1.13122e-23	8	Mnn1	Undifferentiated neurons 2
89	1.51084e-26	0.935607	0.639	0.392	1.95533e-22	8	hig	Undifferentiated neurons 2
90	1.34775e-17	1.09304	0.555	0.403	1.74426e-13	8	Hsp27	Undifferentiated neurons 2
Number	p_val	avg_logFC	pct.1	pct.2	p_val_adj	cluster	gene	Cluster ID
91	5.096e-122	1.0605	0.703	0.109	6.59524e-118	9	sna	Neural progenitor cells 2
92	1.80739e-110	1.20536	0.823	0.181	2.33912e-106	9	klu	Neural progenitor cells 2
93	1.13463e-84	1.17373	0.869	0.264	1.46843e-80	9	Pen	Neural progenitor cells 2
94	4.49872e-81	1.24412	0.96	0.374	5.82224e-77	9	SoxN	Neural progenitor cells 2
95	1.90233e-77	1.05302	0.691	0.164	2.46199e-73	9	fru	Neural progenitor cells 2
96	3.57975e-73	1.08988	0.949	0.471	4.63291e-69	9	nop5	Neural progenitor cells 2
97	4.54426e-65	1.09043	0.943	0.611	5.88118e-61	9	hoip	Neural progenitor cells 2
98	6.6027e-29	1.05361	0.434	0.144	8.54522e-25	9	cas	Neural progenitor cells 2
99	1.64247e-17	1.11566	0.491	0.26	2.12569e-13	9	Pex7	Neural progenitor cells 2
100	7.14767e-15	1.09147	0.526	0.289	9.25051e-11	9	lncRNA:CR40469	Neural progenitor cells 2
Number	p_val	avg_logFC	pct.1	pct.2	p_val_adj	cluster	gene	Cluster ID
101	1.75551e-101	1.74343	0.926	0.264	2.27198e-97	10	Gad1	GABAergic neurons
102	3.2299e-75	2.30855	0.993	0.713	4.18014e-71	10	CG14989	GABAergic neurons
103	2.33519e-60	1.11244	0.993	0.515	3.02221e-56	10	CG32017	GABAergic neurons
104	9.37339e-51	0.781472	0.919	0.371	1.2131e-46	10	CG10804	GABAergic neurons
105	1.0063e-45	0.759665	0.953	0.466	1.30235e-41	10	sif	GABAergic neurons
106	1.56069e-43	0.739966	0.993	0.699	2.01985e-39	10	CG6329	GABAergic neurons
107	1.44296e-31	0.920313	0.289	0.056	1.86748e-27	10	CG45781	GABAergic neurons
108	7.92957e-31	0.760132	0.987	0.717	1.02625e-26	10	Rbp6	GABAergic neurons
109	3.686e-21	0.738726	0.651	0.291	4.77042e-17	10	beat-Ic	GABAergic neurons
110	8.96679e-13	0.8023	0.611	0.338	1.16048e-08	10	Pvf3	GABAergic neurons
Number	p_val	avg_logFC	pct.1	pct.2	p_val_adj	cluster	gene	Cluster ID
111	9.89661e-140	2.73722	0.841	0.141	1.28082e-135	11	bnb	Glial cells 1
112	3.60551e-98	2.79893	0.935	0.331	4.66625e-94	11	Npc2a	Glial cells 1
113	8.97631e-92	2.27468	0.79	0.19	1.16171e-87	11	CG9691	Glial cells 1
114	2.91806e-84	3.23411	0.935	0.424	3.77656e-80	11	CG9686	Glial cells 1
115	7.18366e-84	2.98724	0.935	0.428	9.2971e-80	11	MFS9	Glial cells 1
116	2.3523e-78	3.06052	0.986	0.703	3.04435e-74	11	Obp44a	Glial cells 1
117	9.79561e-75	2.67535	0.848	0.308	1.26775e-70	11	CG8369	Glial cells 1
118	3.13986e-71	2.44063	0.957	0.723	4.06361e-67	11	fabp	Glial cells 1
119	1.75468e-56	2.98902	0.775	0.309	2.27091e-52	11	CG43085	Glial cells 1
120	4.70071e-33	3.00574	0.826	0.623	6.08366e-29	11	Obp99a	Glial cells 1
Number	p_val	avg_logFC	pct.1	pct.2	p_val_adj	cluster	gene	Cluster ID
121	1.92934e-113	2.03641	0.644	0.076	2.49695e-109	12	prt	Mushroom body
122	1.29058e-102	1.75142	0.636	0.081	1.67027e-98	12	Nep1	Mushroom body
123	2.15038e-82	1.79904	0.771	0.169	2.78302e-78	12	pros	Mushroom body
124	4.02162e-73	2.10544	0.975	0.558	5.20477e-69	12	mub	Mushroom body
125	1.0721e-62	1.67714	0.669	0.158	1.38751e-58	12	Dop1R2	Mushroom body
126	1.29747e-62	2.4112	0.941	0.503	1.67918e-58	12	Pka-R2	Mushroom body
127	4.47077e-51	2.22421	0.788	0.339	5.78607e-47	12	Rgk1	Mushroom body
128	1.28228e-47	1.68358	0.669	0.197	1.65953e-43	12	sNPF	Mushroom body
129	7.24454e-40	2.24539	0.915	0.681	9.37588e-36	12	jdp	Mushroom body
130	1.32469e-26	1.70311	0.763	0.51	1.71442e-22	12	Fas2	Mushroom body
Number	p_val	avg_logFC	pct.1	pct.2	p_val_adj	cluster	gene	Cluster ID
131	4.61289e-106	2.42267	0.459	0.035	5.97e-102	13	wupA	Muscle cells
132	5.62638e-97	2.60109	0.423	0.032	7.28166e-93	13	Mf	Muscle cells
133	7.84754e-90	2.21221	0.423	0.035	1.01563e-85	13	Mhc	Muscle cells
134	1.38713e-74	2.87652	0.477	0.058	1.79522e-70	13	Mlc1	Muscle cells
135	2.09057e-60	2.70016	0.432	0.058	2.70561e-56	13	up	Muscle cells
136	5.36498e-53	3.35626	0.559	0.118	6.94336e-49	13	Act57B	Muscle cells
137	1.27185e-51	2.26081	0.36	0.046	1.64603e-47	13	Tm2	Muscle cells
138	1.22124e-43	3.42393	0.595	0.162	1.58053e-39	13	Mlc2	Muscle cells
139	6.18782e-38	2.68007	0.45	0.102	8.00828e-34	13	Mlp60A	Muscle cells
140	8.2918e-31	2.45535	0.279	0.045	1.07312e-26	13	CG7299	Muscle cells
Number	p_val	avg_logFC	pct.1	pct.2	p_val_adj	cluster	gene	Cluster ID
141	5.08309e-88	1.3844	0.903	0.137	6.57854e-84	14	lncRNA:CR45388	Neural progenitor cells 3
142	5.45808e-84	1.56735	0.968	0.179	7.06385e-80	14	N	Neural progenitor cells 3
143	2.51004e-79	1.22303	0.849	0.151	3.2485e-75	14	mira	Neural progenitor cells 3
144	1.38652e-66	1.4662	0.957	0.273	1.79444e-62	14	Pen	Neural progenitor cells 3
145	1.95603e-63	1.67184	0.591	0.087	2.53149e-59	14	Sp1	Neural progenitor cells 3
146	9.73004e-58	1.3386	0.806	0.172	1.25926e-53	14	lncRNA:CR30009	Neural progenitor cells 3
147	2.03836e-57	1.37485	0.548	0.081	2.63804e-53	14	pnt	Neural progenitor cells 3
148	7.19045e-50	1.37657	0.688	0.144	9.30588e-46	14	cas	Neural progenitor cells 3
149	3.22028e-43	1.22395	0.667	0.143	4.16769e-39	14	E23	Neural progenitor cells 3
150	3.1428e-35	1.21264	0.978	0.541	4.06741e-31	14	jigr1	Neural progenitor cells 3
Number	p_val	avg_logFC	pct.1	pct.2	p_val_adj	cluster	gene	Cluster ID
151	1.90794e-223	2.19844	0.967	0.068	2.46925e-219	15	twit	Peptidergic neurons
152	1.57861e-17	4.28993	0.703	0.32	2.04304e-13	15	Ilp5	Peptidergic neurons
153	1.11605e-16	4.40417	0.78	0.466	1.44439e-12	15	Ilp2	Peptidergic neurons
154	1.27883e-15	3.60982	0.659	0.268	1.65507e-11	15	Hug	Peptidergic neurons
155	3.91949e-14	2.78568	0.308	0.081	5.07261e-10	15	Ptth	Peptidergic neurons
156	1.43384e-09	3.30207	0.615	0.307	1.85568e-05	15	Crz	Peptidergic neurons
157	1.71926e-09	2.56235	0.33	0.116	2.22506e-05	15	Dh44	Peptidergic neurons
158	4.3585e-09	2.09778	0.473	0.205	5.64077e-05	15	ImpL2	Peptidergic neurons
159	1.09082e-08	3.21554	0.418	0.175	0.000141174	15	Eh	Peptidergic neurons
160	8.10784e-06	3.41442	0.604	0.309	0.104932	15	ITP	Peptidergic neurons
Number	p_val	avg_logFC	pct.1	pct.2	p_val_adj	cluster	gene	Cluster ID
161	4.99735e-107	1.41784	0.678	0.065	6.46757e-103	16	Rfx	Glutamatergic neurons
162	4.87481e-38	1.44146	0.989	0.649	6.30898e-34	16	CG2269	Glutamatergic neurons
163	4.10672e-32	1.02211	0.931	0.423	5.31491e-28	16	Sytbeta	Glutamatergic neurons
164	4.19954e-29	1.08003	1	0.789	5.43504e-25	16	IA-2	Glutamatergic neurons
165	4.61842e-28	1.113	0.977	0.582	5.97716e-24	16	rad	Glutamatergic neurons
166	1.28438e-27	1.40372	0.644	0.211	1.66225e-23	16	sr	Glutamatergic neurons
167	1.06713e-24	1.77878	0.862	0.552	1.38108e-20	16	VGlut	Glutamatergic neurons
168	5.75752e-22	1.42606	0.839	0.455	7.45139e-18	16	CG4577	Glutamatergic neurons
169	8.37019e-21	1.21136	0.391	0.1	1.08327e-16	16	CrebA	Glutamatergic neurons
170	4.73636e-18	1.19079	0.632	0.255	6.12979e-14	16	AstC-R2	Glutamatergic neurons
Number	p_val	avg_logFC	pct.1	pct.2	p_val_adj	cluster	gene	Cluster ID
171	2.89194e-100	1.20244	0.86	0.113	3.74275e-96	17	grh	Neural progenitor cells 4
172	2.9338e-82	1.05924	0.884	0.14	3.79693e-78	17	E23	Neural progenitor cells 4
173	1.67973e-72	1.07957	0.907	0.171	2.17391e-68	17	fru	Neural progenitor cells 4
174	6.91468e-65	1.09386	0.872	0.171	8.94898e-61	17	lncRNA:CR30009	Neural progenitor cells 4
175	6.83162e-53	1.57732	0.884	0.276	8.84148e-49	17	Pen	Neural progenitor cells 4
176	1.39969e-43	1.05814	0.977	0.385	1.81148e-39	17	Aldh	Neural progenitor cells 4
177	8.18646e-37	1.05024	0.93	0.452	1.05949e-32	17	dUTPase	Neural progenitor cells 4
178	1.06514e-35	1.1688	0.779	0.259	1.37851e-31	17	Pex7	Neural progenitor cells 4
179	1.06229e-26	1.75874	0.791	0.287	1.37481e-22	17	lncRNA:CR43283	Neural progenitor cells 4
180	1.29245e-14	1.60196	0.651	0.227	1.67269e-10	17	CG1124	Neural progenitor cells 4
Number	p_val	avg_logFC	pct.1	pct.2	p_val_adj	cluster	gene	Cluster ID
181	5.30039e-258	2.95764	0.861	0.033	6.85977e-254	18	ple	Monoaminergic neurons
182	1.02219e-143	4.19868	0.944	0.093	1.32292e-139	18	DAT	Monoaminergic neurons
183	6.72179e-63	3.60226	0.986	0.327	8.69934e-59	18	Vmat	Monoaminergic neurons
184	1.56428e-60	1.16227	0.5	0.051	2.02449e-56	18	fd102C	Monoaminergic neurons
185	1.24483e-51	2.08545	0.972	0.325	1.61106e-47	18	Ddc	Monoaminergic neurons
186	2.0526e-21	1.1639	0.958	0.651	2.65648e-17	18	CG2269	Monoaminergic neurons
187	1.58285e-18	1.22557	0.931	0.62	2.04852e-14	18	kek1	Monoaminergic neurons
188	2.03152e-18	1.05539	0.611	0.225	2.62919e-14	18	CG17193	Monoaminergic neurons
189	1.94164e-11	1.0021	0.292	0.081	2.51287e-07	18	CG1402	Monoaminergic neurons
190	2.48005e-06	1.01907	0.694	0.514	0.0320968	18	Fas2	Monoaminergic neurons
Number	p_val	avg_logFC	pct.1	pct.2	p_val_adj	cluster	gene	Cluster ID
191	4.62774e-222	1.33189	0.845	0.036	5.98922e-218	19	Brd	Optic lobe epithelium 1
192	9.03859e-217	1.25265	0.817	0.034	1.16977e-212	19	ft	Optic lobe epithelium 1
193	1.40119e-188	1.24948	0.831	0.043	1.81343e-184	19	wb	Optic lobe epithelium 1
194	7.04377e-186	1.5954	0.873	0.05	9.11605e-182	19	Tom	Optic lobe epithelium 1
195	2.27072e-182	1.47291	0.845	0.047	2.93877e-178	19	Ocho	Optic lobe epithelium 1
196	1.43272e-119	1.64848	0.944	0.099	1.85423e-115	19	stg	Optic lobe epithelium 1
197	2.499e-50	1.85654	0.972	0.354	3.2342e-46	19	CG4250	Optic lobe epithelium 1
198	1.74701e-46	1.12799	0.887	0.225	2.26098e-42	19	CG1124	Optic lobe epithelium 1
199	2.72755e-45	1.31973	0.93	0.277	3.52999e-41	19	Pen	Optic lobe epithelium 1
200	1.63216e-17	1.15286	0.873	0.511	2.11234e-13	19	Fas2	Optic lobe epithelium 1
Number	p_val	avg_logFC	pct.1	pct.2	p_val_adj	cluster	gene	Cluster ID
201	6.19343e-205	1.44218	0.924	0.046	8.01554e-201	20	nerfin-1	Neural progenitor cells 5
202	1.43008e-175	2.015	0.909	0.057	1.8508e-171	20	insb	Neural progenitor cells 5
203	2.06225e-91	1.3806	0.848	0.1	2.66897e-87	20	CG7372	Neural progenitor cells 5
204	1.88003e-87	1.53041	0.97	0.141	2.43313e-83	20	lncRNA:CR45388	Neural progenitor cells 5
205	6.87927e-73	1.43057	0.788	0.103	8.90315e-69	20	stg	Neural progenitor cells 5
206	5.88138e-62	1.4986	0.682	0.086	7.61168e-58	20	tap	Neural progenitor cells 5
207	1.04653e-46	1.36241	0.773	0.15	1.35442e-42	20	lncRNA:alphagamma-element:CR32865	Neural progenitor cells 5
208	7.6676e-41	1.45493	1	0.894	9.92341e-37	20	HmgD	Neural progenitor cells 5
209	5.10579e-33	1.36255	0.955	0.572	6.60791e-29	20	Tet	Neural progenitor cells 5
210	1.41671e-26	3.03461	0.803	0.289	1.8335e-22	20	lncRNA:CR43283	Neural progenitor cells 5
Number	p_val	avg_logFC	pct.1	pct.2	p_val_adj	cluster	gene	Cluster ID
211	5.54178e-66	2.01943	0.903	0.175	7.17217e-62	21	lncRNA:CR30009	Neural progenitor cells 6
212	2.12282e-61	1.491	0.855	0.156	2.74735e-57	21	mira	Neural progenitor cells 6
213	7.72346e-46	1.26975	1	0.278	9.99571e-42	21	Pen	Neural progenitor cells 6
214	6.7511e-43	1.32238	0.952	0.304	8.73728e-39	21	PCNA	Neural progenitor cells 6
215	2.01046e-38	1.50235	0.968	0.454	2.60194e-34	21	dUTPase	Neural progenitor cells 6
216	4.56246e-35	2.04387	0.79	0.262	5.90474e-31	21	Pex7	Neural progenitor cells 6
217	3.13072e-32	1.15801	1	0.847	4.05178e-28	21	CNBP	Neural progenitor cells 6
218	4.92022e-30	1.21682	0.935	0.435	6.36775e-26	21	Chd64	Neural progenitor cells 6
219	3.27558e-28	1.14939	1	0.974	4.23926e-24	21	lncRNA:CR34335	Neural progenitor cells 6
220	4.07122e-25	1.15814	0.29	0.037	5.26897e-21	21	peb	Neural progenitor cells 6
Number	p_val	avg_logFC	pct.1	pct.2	p_val_adj	cluster	gene	Cluster ID
221	1.02412e-275	1.65113	0.87	0.022	1.32541e-271	22	Oaz	Cholinergic neurons 6
222	1.56984e-93	1.42235	0.944	0.092	2.03169e-89	22	acj6	Cholinergic neurons 6
223	3.97086e-82	2.30131	0.963	0.138	5.13909e-78	22	SiaT	Cholinergic neurons 6
224	3.51664e-39	1.59347	1	0.393	4.55123e-35	22	dally	Cholinergic neurons 6
225	1.21881e-35	1.27191	0.907	0.251	1.57738e-31	22	CG7708	Cholinergic neurons 6
226	6.0034e-31	1.34973	0.963	0.373	7.7696e-27	22	ChAT	Cholinergic neurons 6
227	9.12636e-31	1.39946	1	0.712	1.18113e-26	22	cpo	Cholinergic neurons 6
228	5.56811e-28	1.49896	0.963	0.528	7.20625e-24	22	CG43729	Cholinergic neurons 6
229	1.71461e-24	1.35129	0.981	0.685	2.21905e-20	22	hth	Cholinergic neurons 6
230	2.45739e-12	1.8799	0.5	0.181	3.18035e-08	22	pros	Cholinergic neurons 6
Number	p_val	avg_logFC	pct.1	pct.2	p_val_adj	cluster	gene	Cluster ID
231	5.17756e-232	2.3184	0.8	0.022	6.7008e-228	23	E(spl)m4-BFM	Optic lobe epthelium 2
232	3.49328e-177	1.72908	0.74	0.025	4.521e-173	23	CG14132	Optic lobe epthelium 2
233	3.81046e-136	2.33332	0.78	0.042	4.9315e-132	23	E(spl)m8-HLH	Optic lobe epthelium 2
234	1.13039e-103	1.79502	0.68	0.041	1.46296e-99	23	Brd	Optic lobe epthelium 2
235	1.86606e-94	2.62382	0.76	0.061	2.41505e-90	23	E(spl)mgamma-HLH	Optic lobe epthelium 2
236	8.51312e-60	1.4952	0.6	0.057	1.10177e-55	23	Tom	Optic lobe epthelium 2
237	7.53491e-55	1.53209	0.56	0.054	9.75168e-51	23	Ocho	Optic lobe epthelium 2
238	2.84074e-42	1.752	0.94	0.247	3.67648e-38	23	CG42566	Optic lobe epthelium 2
239	1.07659e-39	2.17952	0.98	0.357	1.39332e-35	23	CG4250	Optic lobe epthelium 2
240	1.88061e-31	1.26389	0.72	0.164	2.43388e-27	23	CG9336	Optic lobe epthelium 2
Number	p_val	avg_logFC	pct.1	pct.2	p_val_adj	cluster	gene	Cluster ID
241	2.76147e-76	3.39973	0.979	0.139	3.57389e-72	24	Tsp5D	Glial cells 2
242	1.40006e-57	3.30777	1	0.221	1.81196e-53	24	CG1552	Glial cells 2
243	1.09618e-56	3.5038	1	0.226	1.41868e-52	24	CG7607	Glial cells 2
244	2.3801e-56	3.01082	0.979	0.209	3.08033e-52	24	CG4409	Glial cells 2
245	8.95848e-50	3.21134	0.936	0.216	1.15941e-45	24	Eaat1	Glial cells 2
246	2.47654e-49	3.04729	0.936	0.217	3.20514e-45	24	CG14141	Glial cells 2
247	1.36682e-48	3.5498	0.979	0.262	1.76894e-44	24	CG31705	Glial cells 2
248	2.88301e-37	3.63973	1	0.465	3.73119e-33	24	alrm	Glial cells 2
249	1.01933e-35	3.59296	1	0.503	1.31922e-31	24	Gs2	Glial cells 2
250	2.27847e-35	4.05637	1	0.521	2.9488e-31	24	Gat	Glial cells 2
Number	p_val	avg_logFC	pct.1	pct.2	p_val_adj	cluster	gene	Cluster ID
251	0	2.72317	0.806	0.005	0	25	sro	Prothoracic gland
252	0	2.63528	0.833	0.008	0	25	nvd	Prothoracic gland
253	5.00021e-231	2.58078	0.806	0.016	6.47128e-227	25	CG17549	Prothoracic gland
254	1.60001e-220	3.62945	0.917	0.023	2.07074e-216	25	phm	Prothoracic gland
255	7.14916e-195	2.57755	0.694	0.014	9.25245e-191	25	lncRNA:CR43432	Prothoracic gland
256	7.97862e-177	2.70105	0.806	0.023	1.03259e-172	25	sad	Prothoracic gland
257	2.7605e-140	4.03741	0.944	0.045	3.57264e-136	25	spok	Prothoracic gland
258	3.91863e-125	2.94927	0.722	0.027	5.07149e-121	25	CG15201	Prothoracic gland
259	1.18398e-36	3.1171	1	0.29	1.53231e-32	25	MtnA	Prothoracic gland
260	2.15579e-34	2.92495	1	0.324	2.79003e-30	25	Sirup	Prothoracic gland
Number	p_val	avg_logFC	pct.1	pct.2	p_val_adj	cluster	gene	Cluster ID
261	1.75375e-175	2.41457	0.882	0.027	2.26971e-171	26	CG6287	Glial cells 3
262	7.57239e-156	2.09631	0.765	0.022	9.80018e-152	26	CG30203	Glial cells 3
263	2.47299e-142	2.19511	0.882	0.035	3.20055e-138	26	CG6126	Glial cells 3
264	1.72796e-93	2.65485	0.941	0.068	2.23633e-89	26	Pcyt2	Glial cells 3
265	8.42767e-91	3.36807	0.853	0.056	1.09071e-86	26	CG5080	Glial cells 3
266	1.2871e-83	2.37856	0.912	0.07	1.66577e-79	26	CG3168	Glial cells 3
267	1.23795e-59	2.68804	0.735	0.064	1.60215e-55	26	CG15203	Glial cells 3
268	5.82813e-50	2.00692	0.794	0.092	7.54277e-46	26	Vha36-3	Glial cells 3
269	1.59146e-18	2.32546	0.941	0.622	2.05967e-14	26	MFS3	Glial cells 3
270	1.37832e-10	2.01749	0.735	0.327	1.78383e-06	26	Sirup	Glial cells 3
Number	p_val	avg_logFC	pct.1	pct.2	p_val_adj	cluster	gene	Cluster ID
271	9.1605e-212	3.14545	1	0.028	1.18555e-207	27	Ance-5	Hemocytes
272	1.26169e-180	3.16414	1	0.034	1.63288e-176	27	Pxn	Hemocytes
273	7.88801e-136	3.65935	1	0.049	1.02087e-131	27	vkg	Hemocytes
274	1.89298e-133	3.65518	1	0.05	2.4499e-129	27	Glt	Hemocytes
275	4.73586e-106	4.03055	1	0.067	6.12915e-102	27	Ppn	Hemocytes
276	3.42113e-85	4.62508	1	0.087	4.42762e-81	27	Col4a1	Hemocytes
277	2.97865e-50	4.36124	1	0.171	3.85497e-46	27	SPARC	Hemocytes
278	5.46811e-45	3.24503	1	0.195	7.07683e-41	27	Idgf6	Hemocytes
279	1.79136e-32	4.96869	1	0.322	2.31838e-28	27	CG8157	Hemocytes
280	9.94933e-25	5.22009	1	0.588	1.28764e-20	27	Nplp2	Hemocytes
Number	p_val	avg_logFC	pct.1	pct.2	p_val_adj	cluster	gene	Cluster ID
281	2.51643e-176	3.99449	1	0.018	3.25677e-172	28	Ldsdh1	Corpora allata, ring gland, gut
282	2.5234e-171	4.3644	1	0.018	3.26578e-167	28	Cyp6g2	Corpora allata, ring gland, gut
283	5.73161e-139	2.97864	1	0.024	7.41785e-135	28	CG6426	Corpora allata, ring gland, gut
284	9.99627e-67	3.35501	1	0.056	1.29372e-62	28	CG9331	Corpora allata, ring gland, gut
285	1.37053e-59	4.90942	0.941	0.056	1.77373e-55	28	jhamt	Corpora allata, ring gland, gut
286	7.81094e-42	3.79708	0.941	0.085	1.01089e-37	28	cu	Corpora allata, ring gland, gut
287	1.53434e-28	3.3183	1	0.157	1.98574e-24	28	Hmgs	Corpora allata, ring gland, gut
288	2.92203e-28	2.9425	1	0.161	3.78169e-24	28	Fpps	Corpora allata, ring gland, gut
289	1.40127e-26	3.08657	1	0.172	1.81352e-22	28	PTPMT1	Corpora allata, ring gland, gut
290	7.00773e-12	3.14856	1	0.635	9.0694e-08	28	Sam-S	Corpora allata, ring gland, gut

## Sheet: Number of Cells per Cluster
Clusrter ID	Number of Cells
Cholinergic neurons 1	398
Cholinergic neurons 2	392
Cholinergic neurons 3	382
Undifferentiated neurons 1	369
Cholinergic neurons 4	295
Glutamatergic/GABAergic neurons	262
Cholinergic neurons 5	259
Neural progenitor cells 1	233
Undifferentiated neurons 2	227
Neural progenitor cells 2	175
GABAergic neurons	149
Glial cells 1	138
Mushroom Body	118
Muscle cells	111
Neural progenitor cells 3	93
Peptidergic neurons	91
Glutamatergic neurons	87
Neural progenitor cells 4	86
Monoaminergic neurons	72
Optic lobe epithelium 1	71
Neural progenitor cells 5	66
Neural progenitor cells 6	62
Cholinergic neurons 6	54
Optic lobe epithelium 2	50
Glial cells 2	47
Prothoracic gland	36
Glial cells 3	34
Hemocytes	33
Corpora allata, Ring gland, Gut	17

## Sheet: References
Clusrter ID	Annotation Procedure	Referece
Cholinergic neurons 1	Literature-based	Yasuyama et al., 2002
Cholinergic neurons 2	Literature-based	Yasuyama et al., 2002
Cholinergic neurons 3	Literature-based	Yasuyama et al., 2002
Undifferentiated neurons 1	In sillico considerations	This study
Cholinergic neurons 4	Literature-based	Yasuyama et al., 2002
Glutamatergic/GABAergic neurons	Literature-based	Diao et al., 2015 - Nässel et al., 2008 - Featherstone et al., 2002
Cholinergic neurons 5	Literature-based	Yasuyama et al., 2002
Neural progenitor cells 1	Literature-based	Wang et al., 2011 - Chang et al., 2000 - Uv et al., 1997 - Chell and Brand, 2010
Undifferentiated neurons 2	In sillico considerations	This study
Neural progenitor cells 2	Literature-based	Wang et al., 2011 - Chang et al., 2000 - Uv et al., 1997 - Chell and Brand, 2010
GABAergic neurons	Literature-based	Nässel et al., 2008 - Featherstone et al., 2002
Glial cells 1	Literature-based	Watts et al., 2004 - Soshnev et al., 2013 - Jhaveri et al., 2004 - Garrity et al., 1999
Mushroom Body	Literature-based	Brooks et al., 2011
Muscle cells	Literature-based	Fisher et al., 2012
Neural progenitor cells 3	Literature-based	Wang et al., 2011 - Chang et al., 2000 - Uv et al., 1997 - Chell and Brand, 2010
Peptidergic neurons	Literature-based	Jung et al., 2014 - Veenstra and Ida, 2014 - Andersen et al., 2012 - Ida et al., 2011 - Nässel and Winther, 2010 - Veenstra, 2009 - Wegener and Gorbashov, 2008 - Nassel, 2002
Glutamatergic neurons	Literature-based	Diao et al., 2015
Neural progenitor cells 4	Literature-based	Wang et al., 2011 - Chang et al., 2000 - Uv et al., 1997 - Chell and Brand, 2010
Monoaminergic neurons	Literature-based	Greer et al., 2005
Optic lobe epithelium 1	Literature-based	Egger et al., 2010
Neural progenitor cells 5	Literature-based	Wang et al., 2011 - Chang et al., 2000 - Uv et al., 1997 - Chell and Brand, 2010
Neural progenitor cells 6	Literature-based	Wang et al., 2011 - Chang et al., 2000 - Uv et al., 1997 - Chell and Brand, 2010
Cholinergic neurons 6	Literature-based	Yasuyama et al., 2002
Optic lobe epithelium 2	Literature-based	Egger et al., 2010
Glial cells 2	Literature-based	Watts et al., 2004 - Soshnev et al., 2013 - Jhaveri et al., 2004 - Garrity et al., 1999
Prothoracic gland	Literature-based	Niwa et al., 2010 - Yoshiyama et al., 2006
Glial cells 3	Literature-based	Watts et al., 2004 - Soshnev et al., 2013 - Jhaveri et al., 2004 - Garrity et al., 1999
Hemocytes	Literature-based	Nelson et al., 1994
Corpora allata, Ring gland, Gut	Literature-based	Niwa et al., 2008
