# Supplementary material for: Single cell transcriptome atlas of the Drosophila larval brain
Source: eLife journal article supplement (doi:10.7554/elife.50354), 2019-11-20
Supplement: supp [file elife-50354-supp-v1.zip › elife_poa_e50354_Figure_7_source_data_1.xlsx]

## Sheet: Hoja1
Cluster ID	NORMAL	STARVATION
C32	32	52
Cholinergic neurons	703	1103
Corpora allata/Ring gland/Gut	16	8
GABAergic neurons	171	426
Glial cells	230	365
Glutamatergic neurons	354	463
Hemocytes	33	68
Monoaminergic neurons	124	115
Muscle cells	62	46
Mushroom body	126	213
Neuroblasts	702	569
Neurons X	573	60
Optic lobe epithelium	117	72
Peptidergic neurons	489	545
Prothoracic gland	36	16
Undifferentiated neurons 1	361	223
Undifferentiated neurons 2	220	3
