# Supplementary material for: Single cell transcriptome atlas of the Drosophila larval brain
Source: eLife journal article supplement (doi:10.7554/elife.50354), 2019-11-20
Supplement: supp [file elife-50354-supp-v1.zip › elife_poa_e50354_Supplementary_file_1.xlsx]

## Sheet: Hoja1
Experiment	Library	Estimated Number of Cells	Mean Reads per Cell	Median Genes per Cell	Number of reads	Total Genes Detected	Median UMI Counts per cell	Sequencing Saturation (%)	Sequencer
Normal A	Normal A	1374	762790	1051	1048074265	10789	2228	97.7	NovaSeq 6000
Normal B	Normal B.1	1094	1027823	1234	1124438507	11083	3636	98.4	NovaSeq 6000
	Normal B.2	1283	926211	1109	1188329270	11077	3036	98.5	NovaSeq 6000
Normal C	Normal C	957	602821	2781	575899963	13486	13486	89.3	NovaSeq 6000
Starvation A	Starvation A.1	1851	628152	1921	1162711166	12392	6646	96.4	NovaSeq 6000
	Starvation A.2	1794	636410	2143	1141720746	12650	7519	96.0	NovaSeq 6000
Starvation B	Starvation B	1000	229475	1714	229475135	11113	5667	91.8	NovaSeq 6000
Normal Aggr	All Normal	4708	836393	1434	3937742005	-	4164	-	-
Starvation Aggr	All Starvation	4645	545512	1962	2533907047	-	6800	-	-
