# Supplementary material for: Single cell transcriptome atlas of the Drosophila larval brain
Source: eLife journal article supplement (doi:10.7554/elife.50354), 2019-11-20
Supplement: supp [file elife-50354-supp-v1.zip › elife_poa_e50354_Supplementary_file_2_source_data_1.xlsx]

## Sheet: Cholinergic neurons
Columna1	p_val	avg_logFC	pct.1	pct.2	p_val_adj
Fkbp12	4.11992e-158	0.633104	0.996	0.991	5.79426e-154
awd	9.40683e-128	0.739397	0.982	0.946	1.32298e-123
hoip	4.5076e-121	0.818114	0.747	0.252	6.33948e-117
Non1	5.32438e-120	-0.745149	0.733	0.927	7.48821e-116
Pdcd4	4.4681e-119	-0.733635	0.906	0.983	6.28393e-115
REPTOR-BP	1.12686e-118	-0.772494	0.697	0.918	1.58482e-114
betaTub56D	2.41926e-118	0.624231	0.997	0.986	3.40245e-114
Hsp83	5.63692e-116	0.931574	0.93	0.672	7.92777e-112
Fer1HCH	1.29809e-106	-0.540039	0.959	0.986	1.82564e-102
Hsc70-4	2.16715e-99	0.520034	0.994	0.949	3.04788e-95
lncRNA:CR42862	2.39618e-99	-0.65745	0.788	0.952	3.36999e-95
Hsp26	3.86929e-99	0.801233	0.764	0.302	5.44176e-95
Fer2LCH	1.72212e-98	-0.517738	0.973	0.987	2.42199e-94
Cyp1	2.17141e-98	0.382017	0.997	0.996	3.05387e-94
RpL15	4.59967e-94	-0.329144	0.999	1	6.46897e-90
Ldh	1.00643e-90	0.571123	0.994	0.979	1.41544e-86
Nlp	3.70993e-89	0.590631	0.94	0.806	5.21764e-85
tsr	4.27965e-86	0.492983	0.984	0.967	6.0189e-82
unk	1.30608e-82	-0.652915	0.693	0.916	1.83687e-78
Nph	4.46687e-82	0.630219	0.784	0.405	6.2822e-78
Gapdh1	5.56448e-81	0.477678	0.999	0.995	7.82589e-77
LTV1	1.56904e-79	-0.65543	0.438	0.769	2.2067e-75
alphaTub84B	3.95138e-79	0.409667	0.996	0.995	5.55722e-75
CG5059	3.99162e-73	-0.677408	0.387	0.72	5.61381e-69
smt3	7.74617e-73	0.425334	0.982	0.974	1.08942e-68
InR	2.74821e-70	-0.620614	0.762	0.915	3.86509e-66
eIF3l	8.27923e-70	-0.571366	0.575	0.81	1.16439e-65
fabp	1.41188e-68	0.645801	0.9	0.772	1.98567e-64
COX7A	5.06395e-67	0.45133	0.966	0.936	7.12193e-63
chic	5.35825e-65	0.329522	0.989	0.993	7.53585e-61
eEF1alpha1	1.24015e-64	-0.291352	1	0.998	1.74414e-60
MtnA	1.9959e-63	-0.608851	0.31	0.634	2.80704e-59
CG42566	5.21303e-63	-0.559113	0.205	0.566	7.33161e-59
CG43222	1.53824e-61	0.500567	0.916	0.813	2.16338e-57
RpL24-like	1.90747e-60	-0.457201	0.859	0.934	2.68267e-56
CG10077	3.98718e-60	-0.387568	0.96	0.99	5.60757e-56
CNBP	6.74705e-59	0.441138	0.946	0.883	9.48905e-55
Eno	1.32322e-58	0.366625	1	0.999	1.86098e-54
RpL5	2.36287e-57	-0.258061	0.996	0.999	3.32313e-53
Sirup	1.39362e-54	-0.54979	0.33	0.623	1.95999e-50
RNASEK	2.18141e-54	0.349758	0.984	0.981	3.06794e-50
NHP2	8.63627e-54	0.44425	0.639	0.286	1.21461e-49
Hsp27	4.57688e-52	0.516354	0.506	0.17	6.43693e-48
CG2082	1.71035e-51	-0.64899	0.404	0.706	2.40544e-47
Hsp23	2.27968e-51	0.628854	0.787	0.476	3.20614e-47
Ilp5	2.58113e-49	0.855854	0.404	0.139	3.6301e-45
Uhg4	1.12986e-48	0.43778	0.667	0.329	1.58903e-44
CG9336	7.92551e-48	-0.453868	0.134	0.441	1.11464e-43
COX6B	1.37629e-47	0.351448	0.983	0.964	1.93562e-43
Fkbp39	1.97821e-47	0.465135	0.711	0.431	2.78215e-43
Pglym78	1.14058e-46	0.313725	1	0.992	1.60411e-42
pix	2.54514e-46	-0.442321	0.677	0.826	3.57949e-42
CG12384	1.32976e-45	-0.470703	0.671	0.811	1.87017e-41
CG44325	1.13507e-44	-0.480502	0.307	0.582	1.59637e-40
Tpi	8.00352e-44	0.31352	0.994	0.992	1.12562e-39
eEF2	8.60397e-44	-0.31409	0.967	0.976	1.21006e-39
eIF3k	9.4569e-44	-0.385378	0.841	0.915	1.33002e-39
alphaTub84D	3.79802e-43	0.389151	0.859	0.691	5.34153e-39
CG1572	7.36702e-43	-0.415335	0.148	0.44	1.0361e-38
Jafrac1	7.87665e-43	0.364176	0.898	0.79	1.10777e-38
ATPsynD	1.11462e-42	0.358263	0.96	0.931	1.5676e-38
eEF1delta	2.12123e-42	0.417599	0.703	0.422	2.9833e-38
Ran	6.15517e-42	0.38325	0.882	0.712	8.65662e-38
lncRNA:CR42491	8.83607e-42	0.296845	0.34	0.083	1.2427e-37
Hel25E	9.97973e-42	0.397948	0.808	0.555	1.40355e-37
jhamt	2.0497e-41	-0.363961	0.05	0.314	2.8827e-37
eIF3g1	3.05929e-41	-0.386	0.802	0.888	4.30259e-37
Drat	3.30444e-41	-0.312954	0.976	0.985	4.64736e-37
cype	7.69681e-41	0.269254	0.996	0.995	1.08248e-36
Act42A	9.43444e-41	0.377772	0.946	0.901	1.32686e-36
Nop60B	9.65134e-41	0.39023	0.626	0.32	1.35736e-36
SmF	1.37998e-40	0.378924	0.653	0.349	1.9408e-36
Ip259	2.60948e-40	-0.399157	0.784	0.883	3.66997e-36
CG32486	6.00092e-40	-0.456743	0.334	0.584	8.4397e-36
sun	7.39412e-40	0.361357	0.933	0.898	1.03991e-35
p23	3.30767e-39	0.348604	0.916	0.864	4.6519e-35
Hsp67Bc	3.56624e-39	0.538809	0.925	0.773	5.01557e-35
ATPsynC	7.37113e-39	0.260437	0.999	0.999	1.03668e-34
COX8	1.01026e-38	0.344595	0.966	0.954	1.42083e-34
Glut4EF	1.67002e-38	-0.393251	0.923	0.962	2.34872e-34
CG8369	2.6025e-38	-0.40319	0.293	0.571	3.66016e-34
Tsp42Ee	3.67523e-38	-0.360122	0.794	0.88	5.16885e-34
CG14265	8.58712e-38	-0.289789	0.006	0.218	1.20769e-33
SmD3	8.94588e-38	0.392308	0.623	0.344	1.25815e-33
CG5065	1.00691e-37	0.382392	0.913	0.766	1.41611e-33
eIF3m	1.90987e-37	-0.346399	0.815	0.887	2.68604e-33
Hsp67Ba	2.05248e-37	0.266431	0.212	0.027	2.88661e-33
ATPsynE	2.59367e-37	0.314236	0.957	0.93	3.64774e-33
CG9686	3.28794e-37	-0.409442	0.486	0.715	4.62416e-33
SPARC	3.67755e-37	0.278749	0.252	0.048	5.1721e-33
Vha14-1	1.54191e-36	0.295158	0.952	0.907	2.16855e-32
CG6770	2.33163e-36	-0.387539	0.964	0.982	3.2792e-32
P32	2.77535e-36	0.399862	0.667	0.393	3.90325e-32
Pfdn6	3.44942e-36	0.370309	0.808	0.616	4.85126e-32
CG11267	7.23873e-36	0.403371	0.893	0.768	1.01805e-31
Argk	1.03011e-35	0.272896	0.99	0.985	1.44874e-31
Ntf-2	2.1875e-35	0.353667	0.853	0.654	3.0765e-31
CG33129	2.31572e-35	0.344117	0.896	0.757	3.25684e-31
CG7637	2.60444e-35	0.393627	0.743	0.49	3.66288e-31
CG9691	4.92278e-35	-0.405983	0.189	0.442	6.9234e-31
CCT5	7.39564e-35	0.324725	0.555	0.262	1.04012e-30
Thor	8.16744e-35	-0.391727	0.45	0.664	1.14867e-30
sqd	1.13454e-34	0.30113	0.973	0.923	1.59562e-30
nop5	2.16459e-34	0.35343	0.501	0.228	3.04428e-30
levy	3.35385e-34	0.288087	0.977	0.969	4.71685e-30
rin	3.47197e-34	0.302049	0.943	0.881	4.88298e-30
CG13227	6.81865e-34	-0.258729	0.009	0.203	9.58975e-30
Calr	9.64606e-34	0.304622	0.952	0.91	1.35662e-29
CG17734	2.18752e-33	0.367678	0.845	0.636	3.07653e-29
Uhg5	3.87314e-33	0.329788	0.58	0.292	5.44718e-29
rudhira	5.34334e-33	-0.382991	0.78	0.86	7.51487e-29
Syt4	9.00813e-33	-0.308274	0.888	0.942	1.2669e-28
Lk6	9.59255e-33	-0.329354	0.886	0.957	1.3491e-28
Vha26	1.67329e-32	0.272761	0.962	0.945	2.35332e-28
Non2	1.99178e-32	0.344114	0.842	0.675	2.80124e-28
PyK	8.32388e-32	0.268445	0.999	0.987	1.17067e-27
CG4364	3.07602e-31	-0.355545	0.452	0.641	4.32611e-27
Nop56	9.04753e-31	0.344134	0.65	0.373	1.27244e-26
Pgk	1.40715e-30	0.271258	0.987	0.99	1.97901e-26
La	1.72519e-30	0.300955	0.58	0.304	2.42631e-26
eIF3b	8.11484e-30	-0.333666	0.681	0.791	1.14127e-25
ATPsynF	9.14688e-30	0.293972	0.99	0.985	1.28642e-25
ATPsynO	1.09902e-29	0.326106	0.933	0.894	1.54566e-25
CaMKII	1.3e-29	0.271825	0.977	0.981	1.82833e-25
HmgZ	2.53281e-29	-0.278329	0.986	0.995	3.56214e-25
Inos	4.48122e-29	0.376139	0.703	0.471	6.30238e-25
Dak1	3.11487e-28	0.295319	0.949	0.87	4.38076e-24
kud	3.6012e-28	0.311894	0.691	0.457	5.06473e-24
SmE	8.82518e-28	0.344627	0.735	0.536	1.24117e-23
CG15891	9.67041e-28	-0.375644	0.368	0.562	1.36005e-23
CG9705	2.91285e-27	0.355028	0.679	0.444	4.09663e-23
roh	5.8636e-27	0.298663	0.956	0.925	8.24656e-23
lwr	6.04155e-27	0.263522	0.912	0.841	8.49684e-23
CG3662	6.51911e-27	-0.256085	0.939	0.953	9.16847e-23
CG8157	4.32151e-26	-0.332196	0.452	0.68	6.07776e-22
Sod1	8.15457e-26	0.280725	0.922	0.865	1.14686e-21
SNRPG	1.15803e-25	0.327045	0.815	0.668	1.62865e-21
Crz	1.34457e-25	0.631307	0.431	0.187	1.89101e-21
CG2862	1.62939e-25	0.359969	0.714	0.553	2.29158e-21
Ric	1.77923e-25	-0.274706	0.94	0.962	2.5023e-21
CG42394	2.00999e-25	-0.363726	0.896	0.929	2.82685e-21
COX5B	2.62715e-25	0.259804	0.974	0.959	3.69483e-21
Pfdn5	3.09173e-25	0.291248	0.787	0.607	4.34821e-21
CG7630	4.50435e-25	0.277861	0.967	0.962	6.33492e-21
IscU	4.3513e-24	-0.312034	0.659	0.763	6.11966e-20
FASN1	4.47618e-24	0.274047	0.472	0.231	6.2953e-20
UQCR-14	4.63218e-24	0.260056	0.966	0.931	6.51469e-20
CG14312	6.78953e-24	0.265525	0.912	0.823	9.5488e-20
SmD2	1.05088e-23	0.281575	0.795	0.617	1.47796e-19
Rab7	1.41797e-23	-0.323415	0.636	0.767	1.99424e-19
TMS1	2.09968e-23	-0.266712	0.77	0.84	2.95298e-19
eIF3h	2.57717e-23	-0.286726	0.764	0.837	3.62453e-19
Hr4	2.70448e-23	0.351848	0.552	0.316	3.80358e-19
Sidpn	3.37946e-23	-0.40065	0.343	0.538	4.75288e-19
Hrb98DE	3.64483e-23	0.265682	0.912	0.824	5.1261e-19
ATPsynCF6	4.8304e-23	0.252019	0.962	0.94	6.79348e-19
CG6610	6.36735e-23	0.250847	0.413	0.192	8.95505e-19
PDCD-5	6.74982e-23	0.264297	0.587	0.358	9.49295e-19
Hsc70-3	7.52109e-23	0.305535	0.824	0.643	1.05777e-18
GstZ2	1.95941e-22	0.342836	0.817	0.706	2.75571e-18
UQCR-Q	2.44871e-22	0.270554	0.954	0.941	3.44386e-18
GlyP	2.85657e-22	0.266869	0.967	0.927	4.01747e-18
janA	7.9524e-22	0.259795	0.438	0.217	1.11843e-17
CCT3	1.63051e-21	0.281494	0.623	0.41	2.29315e-17
eIF3c	2.54329e-21	-0.315526	0.498	0.635	3.57688e-17
Hug	2.59238e-21	-0.303504	0.316	0.499	3.64593e-17
eIF2beta	3.02781e-21	0.278301	0.78	0.655	4.25831e-17
Lamp1	3.83567e-21	-0.280152	0.713	0.828	5.39449e-17
CCT4	8.18217e-21	0.268574	0.646	0.415	1.15074e-16
RpII18	1.24e-20	0.273379	0.78	0.595	1.74394e-16
CG6878	1.35389e-20	0.280362	0.654	0.454	1.90411e-16
CG1545	2.13945e-20	-0.265959	0.118	0.291	3.00892e-16
Pomp	3.24227e-20	0.293135	0.765	0.604	4.55993e-16
CG6084	3.75278e-20	0.284158	0.385	0.189	5.27791e-16
dUTPase	4.02011e-20	0.285608	0.531	0.326	5.65388e-16
shrb	9.22229e-20	-0.266146	0.606	0.72	1.29702e-15
uex	1.40714e-19	0.252381	0.883	0.772	1.979e-15
ATPsyndelta	1.60381e-19	0.250309	0.93	0.898	2.2556e-15
mod	2.87583e-19	0.252066	0.657	0.429	4.04457e-15
CG34132	2.90116e-19	0.27507	0.761	0.587	4.08019e-15
Pfdn1	3.02885e-19	0.26194	0.707	0.514	4.25978e-15
hfp	3.71966e-19	-0.253707	0.772	0.834	5.23133e-15
CG2680	6.79591e-19	0.327711	0.555	0.346	9.55777e-15
dod	7.5733e-19	0.264076	0.671	0.466	1.06511e-14
AstA	1.06467e-18	0.696885	0.236	0.083	1.49736e-14
Mnn1	1.37222e-18	-0.302221	0.452	0.59	1.92989e-14
CG42361	1.58486e-18	0.271169	0.767	0.605	2.22894e-14
REPTOR	1.89904e-18	-0.286077	0.609	0.733	2.6708e-14
Tim8	2.49576e-18	0.253131	0.745	0.587	3.51003e-14
alc	3.40214e-18	-0.292573	0.529	0.646	4.78477e-14
Antp	5.4419e-18	-0.92607	0.016	0.132	7.65348e-14
aay	5.15689e-17	0.269235	0.514	0.31	7.25264e-13
hig	9.45624e-17	-0.413445	0.395	0.554	1.32993e-12
CG9328	1.78023e-16	-0.312663	0.417	0.557	2.50371e-12
ND-51	5.95412e-16	-0.260593	0.694	0.76	8.37388e-12
Pcd	9.07011e-16	0.26892	0.748	0.58	1.27562e-11
SNF4Agamma	1.37926e-15	-0.281898	0.61	0.694	1.93979e-11
CG12576	1.69123e-15	-0.25789	0.397	0.534	2.37855e-11
Rab18	2.46557e-15	-0.254454	0.437	0.568	3.46758e-11
CG1695	1.21554e-14	-0.255168	0.673	0.76	1.70954e-10
Lsm12	5.89746e-14	-0.252608	0.582	0.654	8.29419e-10
AstC	6.54517e-14	0.603373	0.324	0.167	9.20513e-10
CG15309	1.12172e-13	-0.259132	0.302	0.439	1.57759e-09
Mkp3	8.69169e-13	-0.300266	0.952	0.965	1.2224e-08
Ilp2	1.11194e-11	0.667111	0.575	0.569	1.56383e-07
Sxl	1.67963e-11	-0.432274	0.912	0.913	2.36223e-07
CG8602	5.57423e-11	-0.253579	0.393	0.488	7.83959e-07
CG14186	1.1799e-10	-0.346548	0.397	0.501	1.65941e-06
bma	1.61175e-10	0.285509	0.59	0.418	2.26677e-06
scrt	1.69127e-10	-0.286908	0.905	0.939	2.3786e-06
CG4577	6.74922e-09	-0.399358	0.713	0.767	9.4921e-05
Proc	7.07276e-08	-0.282655	0.215	0.319	0.000994713
hth	8.45639e-08	-0.272328	0.853	0.879	0.00118931
Tk	1.12363e-07	0.543064	0.132	0.059	0.00158027
natalisin	1.5032e-07	0.353063	0.248	0.15	0.00211409
Hr38	3.21707e-07	-0.481079	0.438	0.511	0.00452449
sr	4.56224e-06	-0.382011	0.351	0.439	0.0641633
DIP-delta	0.0105776	-0.289194	0.186	0.227	1
haf	0.0139441	-0.254188	0.175	0.208	1
ab	0.0297859	-0.26771	0.468	0.465	1
Vmat	0.0424871	0.440399	0.384	0.316	1
ITP	0.279984	-0.425446	0.425	0.404	1
cnc	0.380143	-0.260141	0.186	0.188	1

## Sheet: CA-RG-G
Columna1	p_val	avg_logFC	pct.1	pct.2	p_val_adj
mip40	2.32528e-05	-0.546392	0	0.875	0.327028
Cdc37	2.32528e-05	-0.670837	0	0.875	0.327028
ALiX	2.32528e-05	-0.69273	0	0.875	0.327028
apt	2.32528e-05	-0.734127	0	0.875	0.327028
ics	2.32528e-05	-0.764008	0	0.875	0.327028
CG42258	2.32528e-05	-0.87044	0	0.875	0.327028
nudE	9.32598e-05	-0.518999	0.062	1	1
mRpL43	0.000131462	-0.432883	0	0.75	1
CG32549	0.000131462	-0.512969	0	0.75	1
RagC-D	0.000131462	-0.519012	0	0.75	1
CG8289	0.000131462	-0.524608	0	0.75	1
mAChR-A	0.000131462	-0.540144	0	0.75	1
SNF4Agamma	0.000131462	-0.547818	0	0.75	1
Hr78	0.000131462	-0.560479	0	0.75	1
TRAM	0.000131462	-0.561018	0	0.75	1
CG10417	0.000131462	-0.563218	0	0.75	1
SIFa	0.000131462	-0.569651	0	0.75	1
CG43085	0.000131462	-0.600531	0	0.75	1
TM9SF2	0.000131462	-0.639582	0	0.75	1
CG5989	0.000131462	-0.662451	0	0.75	1
kay	0.000148093	-0.645879	0.062	0.875	1
Pdhb	0.000148093	-0.921087	0.062	0.875	1
swm	0.000198216	-0.635466	0.062	0.875	1
CG31717	0.000263968	-0.624154	0.062	0.875	1
CG4538	0.000349764	-0.664589	0.062	0.875	1
TMS1	0.000377312	-0.921407	0.125	0.875	1
Vha100-1	0.000429626	-0.868611	0.125	1	1
CG9581	0.000461121	-0.527114	0.062	0.875	1
alrm	0.000461121	-0.556261	0.062	0.875	1
CG3702	0.000461121	-0.608375	0.062	0.875	1
Uhg7	0.000461121	-0.798684	0.062	0.875	1
CG13868	0.000638631	-0.695742	0.125	0.875	1
CG11357	0.000659165	-0.256942	0	0.625	1
CG6013	0.000659165	-0.258557	0	0.625	1
CG3558	0.000659165	-0.286887	0	0.625	1
CG7872	0.000659165	-0.286887	0	0.625	1
CG7611	0.000659165	-0.286887	0	0.625	1
CG10960	0.000659165	-0.292002	0	0.625	1
su(f)	0.000659165	-0.305662	0	0.625	1
CG12004	0.000659165	-0.333388	0	0.625	1
l(3)73Ah	0.000659165	-0.338951	0	0.625	1
Rnp4F	0.000659165	-0.349579	0	0.625	1
CG7083	0.000659165	-0.350921	0	0.625	1
zfh2	0.000659165	-0.353586	0	0.625	1
Picot	0.000659165	-0.354922	0	0.625	1
CG1236	0.000659165	-0.364989	0	0.625	1
Rok	0.000659165	-0.369201	0	0.625	1
Smg5	0.000659165	-0.381204	0	0.625	1
Pex12	0.000659165	-0.381334	0	0.625	1
Su(Tpl)	0.000659165	-0.384955	0	0.625	1
Faf2	0.000659165	-0.388441	0	0.625	1
Nhe3	0.000659165	-0.389985	0	0.625	1
PI4KIIIalpha	0.000659165	-0.390238	0	0.625	1
Eip63E	0.000659165	-0.393833	0	0.625	1
CG17985	0.000659165	-0.393958	0	0.625	1
CG12391	0.000659165	-0.415116	0	0.625	1
Hmt-1	0.000659165	-0.420364	0	0.625	1
Toll-6	0.000659165	-0.427824	0	0.625	1
loco	0.000659165	-0.431779	0	0.625	1
Asap	0.000659165	-0.432683	0	0.625	1
Syx8	0.000659165	-0.433258	0	0.625	1
godzilla	0.000659165	-0.434118	0	0.625	1
Sesn	0.000659165	-0.434118	0	0.625	1
mats	0.000659165	-0.43428	0	0.625	1
Cyp4g15	0.000659165	-0.434979	0	0.625	1
CG1814	0.000659165	-0.441589	0	0.625	1
JTBR	0.000659165	-0.445739	0	0.625	1
Gpdh1	0.000659165	-0.447839	0	0.625	1
Eh	0.000659165	-0.456014	0	0.625	1
CenB1A	0.000659165	-0.457259	0	0.625	1
Nup153	0.000659165	-0.457457	0	0.625	1
CG12404	0.000659165	-0.462847	0	0.625	1
TfIIEbeta	0.000659165	-0.486747	0	0.625	1
holn1	0.000659165	-0.488615	0	0.625	1
vir-1	0.000659165	-0.499929	0	0.625	1
CG5104	0.000659165	-0.501462	0	0.625	1
Tak1	0.000659165	-0.508795	0	0.625	1
Sptr	0.000659165	-0.525623	0	0.625	1
CG9467	0.000659165	-0.532109	0	0.625	1
MFS18	0.000659165	-0.552024	0	0.625	1
raptor	0.000659165	-0.563113	0	0.625	1
CG1146	0.000659165	-0.639484	0	0.625	1
CG15628	0.000659165	-0.65304	0	0.625	1
CG10747	0.000659165	-0.672678	0	0.625	1
Vps4	0.000692525	-0.631536	0.062	0.75	1
CG11857	0.000912227	-0.614063	0.062	0.75	1
Nlg1	0.000912227	-0.66125	0.062	0.75	1
Fim	0.000912227	-0.715962	0.062	0.75	1
Sh3beta	0.000912227	-0.758745	0.062	0.75	1
RpL41	0.000943613	-0.314457	1	1	1
CG3678	0.00106095	-0.590632	0.125	0.875	1
ThrRS	0.00106095	-0.689566	0.125	0.875	1
NTPase	0.00119509	-0.452897	0.062	0.75	1
CG17059	0.00119509	-0.689395	0.062	0.75	1
mRpS14	0.00119509	-0.816112	0.062	0.75	1
Nacalpha	0.00125906	0.509154	1	1	1
Svil	0.00150337	-0.796798	0.125	0.75	1
CG5273	0.00155717	-0.2833	0.062	0.75	1
CG5220	0.00155717	-0.30771	0.062	0.75	1
Capr	0.00155717	-0.345215	0.062	0.75	1
INPP5E	0.00155717	-0.365855	0.062	0.75	1
MCTS1	0.00155717	-0.378182	0.062	0.75	1
CG13506	0.00155717	-0.391084	0.062	0.75	1
AGO2	0.00155717	-0.443042	0.062	0.75	1
CG4789	0.00155717	-0.587525	0.062	0.75	1
Pur-alpha	0.00155717	-0.617688	0.062	0.75	1
CSN4	0.00155717	-0.70114	0.062	0.75	1
Arpc5	0.0017301	-0.365655	0.125	0.875	1
MRG15	0.0017301	-0.461745	0.125	0.875	1
msi	0.0017301	-0.59603	0.125	0.875	1
CG34293	0.00201796	-0.273785	0.062	0.75	1
pyd	0.00201796	-0.293633	0.062	0.75	1
CG42524	0.00201796	-0.315177	0.062	0.75	1
CG4409	0.00201796	-0.329909	0.062	0.75	1
Larp4B	0.00201796	-0.331123	0.062	0.75	1
Mob4	0.00201796	-0.331466	0.062	0.75	1
RhoGAP68F	0.00201796	-0.366389	0.062	0.75	1
CG8314	0.00201796	-0.41964	0.062	0.75	1
CG30499	0.00201796	-0.45264	0.062	0.75	1
vib	0.00219403	-0.518372	0.125	0.875	1
CG5567	0.00219403	-0.529341	0.125	0.875	1
modSP	0.00219403	-0.56022	0.125	0.875	1
RpL29	0.00278461	-0.391217	1	1	1
Rip11	0.00289698	-0.670738	0.062	0.625	1
twin	0.00297483	-0.250759	0	0.5	1
PPP1R15	0.00297483	-0.251636	0	0.5	1
tkv	0.00297483	-0.254006	0	0.5	1
CG31357	0.00297483	-0.254297	0	0.5	1
RhoBTB	0.00297483	-0.254297	0	0.5	1
CG5599	0.00297483	-0.255035	0	0.5	1
Taf6	0.00297483	-0.259581	0	0.5	1
ClC-c	0.00297483	-0.26148	0	0.5	1
CG15093	0.00297483	-0.263532	0	0.5	1
CG13689	0.00297483	-0.264408	0	0.5	1
Tmtc3	0.00297483	-0.265423	0	0.5	1
CG12730	0.00297483	-0.265423	0	0.5	1
dare	0.00297483	-0.266011	0	0.5	1
CG11982	0.00297483	-0.266439	0	0.5	1
fwd	0.00297483	-0.267313	0	0.5	1
Ccz1	0.00297483	-0.268333	0	0.5	1
CG7632	0.00297483	-0.268333	0	0.5	1
CG11103	0.00297483	-0.269053	0	0.5	1
mRpS25	0.00297483	-0.273835	0	0.5	1
CG9667	0.00297483	-0.274984	0	0.5	1
Ptpa	0.00297483	-0.279165	0	0.5	1
CG7492	0.00297483	-0.282028	0	0.5	1
ave	0.00297483	-0.287882	0	0.5	1
Src42A	0.00297483	-0.287882	0	0.5	1
Ama	0.00297483	-0.289448	0	0.5	1
CG7218	0.00297483	-0.289448	0	0.5	1
Tango5	0.00297483	-0.29044	0	0.5	1
cbt	0.00297483	-0.291012	0	0.5	1
Nplp1	0.00297483	-0.291723	0	0.5	1
Suox	0.00297483	-0.291864	0	0.5	1
CG10082	0.00297483	-0.293144	0	0.5	1
Mef2	0.00297483	-0.296961	0	0.5	1
bdl	0.00297483	-0.297521	0	0.5	1
CG17883	0.00297483	-0.298506	0	0.5	1
RpII33	0.00297483	-0.303003	0	0.5	1
GABA-B-R1	0.00297483	-0.310408	0	0.5	1
CG34039	0.00297483	-0.310408	0	0.5	1
p130CAS	0.00297483	-0.310408	0	0.5	1
scramb2	0.00297483	-0.310968	0	0.5	1
Nep3	0.00297483	-0.3125	0	0.5	1
CG30197	0.00297483	-0.312635	0	0.5	1
ArfGAP1	0.00297483	-0.318586	0	0.5	1
Ns2	0.00297483	-0.319833	0	0.5	1
Mkrn1	0.00297483	-0.320518	0	0.5	1
Oatp74D	0.00297483	-0.321209	0	0.5	1
GstE13	0.00297483	-0.328065	0	0.5	1
Cdk5alpha	0.00297483	-0.329569	0	0.5	1
clt	0.00297483	-0.332169	0	0.5	1
LpR1	0.00297483	-0.333256	0	0.5	1
Paip2	0.00297483	-0.333256	0	0.5	1
Cht11	0.00297483	-0.33746	0	0.5	1
Ripalpha	0.00297483	-0.338678	0	0.5	1
Cyp6t3	0.00297483	-0.340034	0	0.5	1
mthl3	0.00297483	-0.345019	0	0.5	1
CG8461	0.00297483	-0.34556	0	0.5	1
trc	0.00297483	-0.361997	0	0.5	1
RN-tre	0.00297483	-0.364601	0	0.5	1
CG10600	0.00297483	-0.365387	0	0.5	1
ncd	0.00297483	-0.365824	0	0.5	1
CR12628	0.00297483	-0.367758	0	0.5	1
RanBPM	0.00297483	-0.368411	0	0.5	1
ssp	0.00297483	-0.368936	0	0.5	1
gfzf	0.00297483	-0.368936	0	0.5	1
CG4860	0.00297483	-0.373	0	0.5	1
Spt6	0.00297483	-0.38293	0	0.5	1
by	0.00297483	-0.384832	0	0.5	1
Usp10	0.00297483	-0.391568	0	0.5	1
CG43737	0.00297483	-0.395369	0	0.5	1
CG12259	0.00297483	-0.39626	0	0.5	1
egr	0.00297483	-0.407106	0	0.5	1
mRpL3	0.00297483	-0.415375	0	0.5	1
CIA30	0.00297483	-0.418037	0	0.5	1
whd	0.00297483	-0.427574	0	0.5	1
vap	0.00297483	-0.432514	0	0.5	1
CG8617	0.00297483	-0.435633	0	0.5	1
CR43382	0.00297483	-0.441708	0	0.5	1
Ntmt	0.00297483	-0.442686	0	0.5	1
Wbp2	0.00297483	-0.453735	0	0.5	1
GatB	0.00297483	-0.479017	0	0.5	1
CG6330	0.00297483	-0.47902	0	0.5	1
CG1598	0.00297483	-0.485001	0	0.5	1
CG5167	0.00297483	-0.506851	0	0.5	1
CG33298	0.00297483	-0.532779	0	0.5	1
CG1545	0.00297483	-0.551801	0	0.5	1
mbt	0.00297483	-0.575183	0	0.5	1
E(Pc)	0.00297483	-0.596848	0	0.5	1
Mes2	0.00297483	-0.60008	0	0.5	1
Obp99a	0.00323117	-0.900153	0.312	0.875	1
CG44243	0.00375593	-0.516227	0.062	0.625	1
Lst8	0.0039495	-0.552922	0.125	0.75	1
CG32521	0.00410365	-0.627772	0.625	1	1
CG31855	0.00435256	-0.325029	0.125	0.875	1
hts	0.00435256	-0.369752	0.125	0.875	1
CG1309	0.00435256	-0.380563	0.125	0.875	1
l(1)G0193	0.00435256	-0.557282	0.125	0.875	1
lsn	0.00484044	-0.301955	0.062	0.625	1
mod(mdg4)	0.00484044	-0.30235	0.062	0.625	1
Slbp	0.00484044	-0.351772	0.062	0.625	1
Cdk7	0.00484044	-0.35309	0.062	0.625	1
PPP4R2r	0.00484044	-0.387763	0.062	0.625	1
CG4042	0.00484044	-0.397775	0.062	0.625	1
CG3107	0.00484044	-0.405794	0.062	0.625	1
SH3PX1	0.00484044	-0.426248	0.062	0.625	1
Evi5	0.00484044	-0.485621	0.062	0.625	1
alpha-PheRS	0.00484044	-0.5445	0.062	0.625	1
CG8073	0.00484044	-0.692398	0.062	0.625	1
ox	0.00496647	-0.724854	0.125	0.75	1
CBP	0.0050587	-0.780114	0.188	0.875	1
RpL39	0.00532148	-0.414199	1	1	1
CkIIalpha	0.00569509	-0.615662	0.375	1	1
CG15908	0.00620087	-0.259235	0.062	0.625	1
CG6903	0.00620087	-0.268876	0.062	0.625	1
CG5793	0.00620087	-0.278488	0.062	0.625	1
trus	0.00620087	-0.28449	0.062	0.625	1
CG2765	0.00620087	-0.308545	0.062	0.625	1
Pih1D1	0.00620087	-0.310142	0.062	0.625	1
Gabat	0.00620087	-0.31313	0.062	0.625	1
CG8111	0.00620087	-0.317791	0.062	0.625	1
CG6236	0.00620087	-0.32374	0.062	0.625	1
CG11777	0.00620087	-0.325446	0.062	0.625	1
CG5112	0.00620087	-0.340328	0.062	0.625	1
Zip102B	0.00620087	-0.354346	0.062	0.625	1
tank	0.00620087	-0.360192	0.062	0.625	1
ACC	0.00620087	-0.368198	0.062	0.625	1
JIL-1	0.00620087	-0.379839	0.062	0.625	1
Mbs	0.00620087	-0.384024	0.062	0.625	1
Ent2	0.00620087	-0.391598	0.062	0.625	1
Atox1	0.00620087	-0.439405	0.062	0.625	1
bmm	0.00620087	-0.441726	0.062	0.625	1
mask	0.00620087	-0.443444	0.062	0.625	1
Uhg5	0.00620087	-0.447746	0.062	0.625	1
mRpS29	0.00620087	-0.453038	0.062	0.625	1
ewg	0.00620087	-0.455782	0.062	0.625	1
gro	0.00620087	-0.471838	0.062	0.625	1
geminin	0.00620087	-0.502363	0.062	0.625	1
brat	0.00620087	-0.567475	0.062	0.625	1
Ugt86Da	0.00620087	-0.583112	0.062	0.625	1
CG8671	0.00621467	-0.308579	0.125	0.75	1
RnrS	0.00621467	-0.386088	0.125	0.75	1
CG9776	0.00621467	-0.442245	0.125	0.75	1
Nhe1	0.00621467	-0.455289	0.125	0.75	1
CG4968	0.00621467	-0.475774	0.125	0.75	1
rl	0.00621467	-0.524333	0.125	0.75	1
CG9691	0.00621467	-0.526677	0.125	0.75	1
CG31635	0.00621467	-0.549204	0.125	0.75	1
Cat	0.00621467	-0.564014	0.125	0.75	1
Oat	0.00621467	-0.628531	0.125	0.75	1
Prx6005	0.00621467	-0.633298	0.125	0.75	1
Pfdn4	0.00623993	-0.631537	0.188	0.875	1
Rpn10	0.00623993	-0.661964	0.188	0.875	1
mt:ND1	0.00665087	-0.982662	0.5	1	1
AP-2sigma	0.00753184	-0.321433	0.312	1	1
Rsf1	0.00766395	-0.346402	0.188	0.875	1
Kap-alpha3	0.00766395	-0.749212	0.188	0.875	1
CG17202	0.00773857	-0.330964	0.125	0.75	1
DCTN2-p50	0.00773857	-0.34339	0.125	0.75	1
CG3719	0.00773857	-0.380396	0.125	0.75	1
Hrb98DE	0.00773857	-0.488767	0.125	0.75	1
l(3)02640	0.00773857	-0.567412	0.125	0.75	1
CG17221	0.00789641	-0.258497	0.062	0.625	1
HnRNP-K	0.00789641	-0.264658	0.062	0.625	1
CG6617	0.00789641	-0.278185	0.062	0.625	1
CG12239	0.00789641	-0.281844	0.062	0.625	1
Usp7	0.00789641	-0.302881	0.062	0.625	1
Ubc4	0.00789641	-0.312757	0.062	0.625	1
Met	0.00789641	-0.319689	0.062	0.625	1
pnt	0.00789641	-0.32864	0.062	0.625	1
Pkc98E	0.00789641	-0.335498	0.062	0.625	1
CG34449	0.00789641	-0.357187	0.062	0.625	1
lncRNA:CR42651	0.00789641	-0.361978	0.062	0.625	1
Jupiter	0.00789641	-0.3671	0.062	0.625	1
chas	0.00789641	-0.376441	0.062	0.625	1
mura	0.00789641	-0.385587	0.062	0.625	1
zormin	0.00789641	-0.389107	0.062	0.625	1
CG3714	0.00789641	-0.431499	0.062	0.625	1
CG9934	0.00789641	-0.483743	0.062	0.625	1
CG8369	0.00789641	-0.663424	0.062	0.625	1
Not1	0.00804061	-0.686525	0.25	1	1
vsg	0.00837719	-0.388417	0.188	1	1
klar	0.00837719	-0.630825	0.25	0.875	1
sta	0.00874814	0.313772	1	1	1
RpL6	0.00874814	0.272102	1	1	1
Atg8a	0.00874814	-0.498549	1	1	1
robo2	0.00910804	-0.526464	0.375	0.875	1
Glut4EF	0.00910804	-0.54075	0.312	1	1
Rab35	0.00937263	-0.369842	0.188	0.875	1
CCT7	0.00937263	-0.56537	0.188	0.875	1
HDAC4	0.00958918	-0.264407	0.125	0.75	1
Vps35	0.00958918	-0.271032	0.125	0.75	1
slpr	0.00958918	-0.273291	0.125	0.75	1
nsl1	0.00958918	-0.285748	0.125	0.75	1
Pitslre	0.00958918	-0.290179	0.125	0.75	1
LSm7	0.00958918	-0.295764	0.125	0.75	1
CG9330	0.00958918	-0.30322	0.125	0.75	1
CG7382	0.00958918	-0.318126	0.125	0.75	1
mRpL10	0.00958918	-0.322935	0.125	0.75	1
CG8237	0.00958918	-0.331627	0.125	0.75	1
CG17698	0.00958918	-0.352026	0.125	0.75	1
P5CDh1	0.00958918	-0.450111	0.125	0.75	1
Flo1	0.00958918	-0.582394	0.125	0.75	1
dally	0.0107046	-0.804875	0.312	0.875	1
ATPsynCF6	0.0107441	0.54247	0.938	1	1
CG45050	0.0108512	-0.691004	0.438	1	1
wds	0.0114133	-0.27998	0.188	0.875	1
mRpL47	0.0114133	-0.289961	0.188	0.875	1
CG9065	0.0114133	-0.351973	0.188	0.875	1
Nmda1	0.0114133	-0.450635	0.188	0.875	1
Myd88	0.0118246	-0.255366	0.125	0.75	1
CG5446	0.0118246	-0.272605	0.125	0.75	1
Syx7	0.0118246	-0.29866	0.125	0.75	1
RpII215	0.0118246	-0.315876	0.125	0.75	1
TyrRS-m	0.0122986	-0.25001	0	0.375	1
sno	0.0122986	-0.264837	0	0.375	1
drpr	0.0122986	-0.264837	0	0.375	1
CG9399	0.0122986	-0.266298	0	0.375	1
CG10395	0.0122986	-0.266298	0	0.375	1
Ptp10D	0.0122986	-0.268619	0	0.375	1
CG11970	0.0122986	-0.268912	0	0.375	1
CG10721	0.0122986	-0.268912	0	0.375	1
betaCOP	0.0122986	-0.268912	0	0.375	1
CG2059	0.0122986	-0.269198	0	0.375	1
CG3632	0.0122986	-0.270363	0	0.375	1
nxf2	0.0122986	-0.270508	0	0.375	1
Tg	0.0122986	-0.270948	0	0.375	1
CG5823	0.0122986	-0.271804	0	0.375	1
AhcyL1	0.0122986	-0.273252	0	0.375	1
E(bx)	0.0122986	-0.276139	0	0.375	1
mr	0.0122986	-0.277723	0	0.375	1
CG11284	0.0122986	-0.289309	0	0.375	1
CRMP	0.0122986	-0.292143	0	0.375	1
egl	0.0122986	-0.292144	0	0.375	1
Acf	0.0122986	-0.292281	0	0.375	1
CG8379	0.0122986	-0.293424	0	0.375	1
MESR4	0.0122986	-0.29384	0	0.375	1
CG3376	0.0122986	-0.295968	0	0.375	1
Scm	0.0122986	-0.296246	0	0.375	1
CG17343	0.0122986	-0.296246	0	0.375	1
CG17486	0.0122986	-0.296814	0	0.375	1
Nsf2	0.0122986	-0.304401	0	0.375	1
BCAS2	0.0122986	-0.305523	0	0.375	1
CG14591	0.0122986	-0.305938	0	0.375	1
DhpD	0.0122986	-0.310272	0	0.375	1
Men-b	0.0122986	-0.311244	0	0.375	1
CG5068	0.0122986	-0.313048	0	0.375	1
CG8230	0.0122986	-0.313048	0	0.375	1
bnb	0.0122986	-0.31527	0	0.375	1
Lnpk	0.0122986	-0.315688	0	0.375	1
CG5521	0.0122986	-0.316009	0	0.375	1
CG32732	0.0122986	-0.316009	0	0.375	1
spok	0.0122986	-0.316009	0	0.375	1
gce	0.0122986	-0.318173	0	0.375	1
Sps2	0.0122986	-0.320015	0	0.375	1
Pgam5	0.0122986	-0.323273	0	0.375	1
CG8931	0.0122986	-0.323273	0	0.375	1
CG13255	0.0122986	-0.328205	0	0.375	1
vls	0.0122986	-0.336425	0	0.375	1
CG14186	0.0122986	-0.337916	0	0.375	1
CG42365	0.0122986	-0.341836	0	0.375	1
AMPKalpha	0.0122986	-0.342063	0	0.375	1
SF1	0.0122986	-0.342778	0	0.375	1
Pi3K68D	0.0122986	-0.344525	0	0.375	1
Samuel	0.0122986	-0.34691	0	0.375	1
APP-BP1	0.0122986	-0.349713	0	0.375	1
nAChRalpha5	0.0122986	-0.350396	0	0.375	1
abs	0.0122986	-0.351855	0	0.375	1
CG1265	0.0122986	-0.352654	0	0.375	1
mRpL54	0.0122986	-0.356659	0	0.375	1
eIF2D	0.0122986	-0.365564	0	0.375	1
CG13186	0.0122986	-0.36564	0	0.375	1
jar	0.0122986	-0.372258	0	0.375	1
CG12512	0.0122986	-0.376387	0	0.375	1
Vps16A	0.0122986	-0.377693	0	0.375	1
beta4GalNAcTA	0.0122986	-0.379903	0	0.375	1
Shc	0.0122986	-0.380077	0	0.375	1
CG32052	0.0122986	-0.385512	0	0.375	1
CG32195	0.0122986	-0.385512	0	0.375	1
l(3)72Ab	0.0122986	-0.386932	0	0.375	1
CG4020	0.0122986	-0.393057	0	0.375	1
CG43061	0.0122986	-0.393446	0	0.375	1
Taf11	0.0122986	-0.395535	0	0.375	1
CG42340	0.0122986	-0.395618	0	0.375	1
CG6565	0.0122986	-0.402502	0	0.375	1
Adck	0.0122986	-0.414486	0	0.375	1
Nuf2	0.0122986	-0.424516	0	0.375	1
tara	0.0122986	-0.463609	0	0.375	1
smal	0.0122986	-0.465756	0	0.375	1
CG6674	0.0122986	-0.479956	0	0.375	1
CG17323	0.0122986	-0.539662	0	0.375	1
Irp-1B	0.0123151	-0.7636	0.25	0.875	1
tai	0.0124409	-0.650857	0.188	0.75	1
Plc21C	0.0124409	-0.709806	0.188	0.75	1
Obp44a	0.0129714	-0.770369	0.438	1	1
pAbp	0.0131208	-0.321395	0.938	1	1
ND-B17	0.0131684	-0.610788	0.312	1	1
RpS14b	0.0137285	-0.975912	0.5	1	1
Mo25	0.0138392	-0.263797	0.188	0.875	1
how	0.0138392	-0.26967	0.188	0.875	1
CG4729	0.0138392	-0.296806	0.188	0.875	1
mRpS21	0.0138392	-0.354687	0.188	0.875	1
Pect	0.0141262	-0.303624	0.25	1	1
Pep	0.0141262	-0.45919	0.25	1	1
RhoGDI	0.0145106	-0.264108	0.125	0.75	1
cni	0.0151413	-0.33948	0.188	0.75	1
CycG	0.0154788	-0.372264	0.812	1	1
GstT4	0.0155463	-0.71337	0.875	1	1
mub	0.0167096	-0.347735	0.188	0.875	1
CG10433	0.0177265	-0.316733	0.062	0.5	1
Pura	0.0177265	-0.354627	0.062	0.5	1
ttk	0.0177265	-0.455838	0.062	0.5	1
CG9948	0.0177265	-0.461084	0.062	0.5	1
ksh	0.0177265	-0.477692	0.062	0.5	1
l(3)L1231	0.0177265	-0.49666	0.062	0.5	1
CG5612	0.0177265	-0.620064	0.062	0.5	1
AsnRS	0.0183452	-0.408949	0.188	0.75	1
Rab5	0.0183452	-0.492808	0.188	0.75	1
nemy	0.0183452	-0.590655	0.188	0.75	1
mt:CoI	0.0191768	-0.488663	1	1	1
Arf79F	0.0193088	-0.597292	0.5	1	1
CG9067	0.0200607	-0.295931	0.125	0.625	1
CG43729	0.0200607	-0.353185	0.125	0.625	1
CG9662	0.0200607	-0.360148	0.125	0.625	1
CG32850	0.0200607	-0.430997	0.125	0.625	1
Tsp42Ea	0.0200607	-0.444601	0.125	0.625	1
CG9628	0.0200607	-0.448364	0.125	0.625	1
toc	0.0200607	-0.459693	0.125	0.625	1
Ac76E	0.0200607	-0.513985	0.125	0.625	1
Lsd-2	0.0200607	-0.715639	0.125	0.625	1
mt:ND4	0.0206638	-0.823834	0.625	1	1
kuz	0.0212932	-0.504083	0.25	0.875	1
mt:ND3	0.0212932	-0.68122	0.25	0.875	1
ced-6	0.0221276	-0.322228	0.188	0.75	1
RPA3	0.0221276	-0.378348	0.188	0.75	1
Ssadh	0.0221276	-0.433413	0.188	0.75	1
KdelR	0.0222543	-0.519013	0.312	1	1
CG10418	0.0223097	-0.250855	0.062	0.5	1
Rab23	0.0223097	-0.271142	0.062	0.5	1
sev	0.0223097	-0.271644	0.062	0.5	1
CG2017	0.0223097	-0.272595	0.062	0.5	1
CG16721	0.0223097	-0.272731	0.062	0.5	1
Schip1	0.0223097	-0.275968	0.062	0.5	1
CG4570	0.0223097	-0.278344	0.062	0.5	1
Ythdf	0.0223097	-0.28303	0.062	0.5	1
Kmn2	0.0223097	-0.283685	0.062	0.5	1
Tap42	0.0223097	-0.287229	0.062	0.5	1
dmpd	0.0223097	-0.288924	0.062	0.5	1
Cds	0.0223097	-0.289323	0.062	0.5	1
CG13994	0.0223097	-0.291234	0.062	0.5	1
GlyRS	0.0223097	-0.29511	0.062	0.5	1
PrBP	0.0223097	-0.29522	0.062	0.5	1
Syx6	0.0223097	-0.296923	0.062	0.5	1
Atg9	0.0223097	-0.301298	0.062	0.5	1
APC10	0.0223097	-0.32331	0.062	0.5	1
RabX1	0.0223097	-0.323597	0.062	0.5	1
Atg18a	0.0223097	-0.325464	0.062	0.5	1
Akt1	0.0223097	-0.329509	0.062	0.5	1
pck	0.0223097	-0.330385	0.062	0.5	1
CG14683	0.0223097	-0.331842	0.062	0.5	1
CG3732	0.0223097	-0.339184	0.062	0.5	1
Unc-76	0.0223097	-0.347321	0.062	0.5	1
Pngl	0.0223097	-0.367848	0.062	0.5	1
CG15117	0.0223097	-0.423593	0.062	0.5	1
Non2	0.0223097	-0.505186	0.062	0.5	1
CG6028	0.0240523	-0.314816	0.188	0.875	1
Bruce	0.0245141	-0.273114	0.125	0.625	1
TfIIA-L	0.0245141	-0.276374	0.125	0.625	1
Ppt2	0.0245141	-0.299507	0.125	0.625	1
msn	0.0245141	-0.322399	0.125	0.625	1
alpha-Est9	0.0245141	-0.331182	0.125	0.625	1
Atg1	0.0245141	-0.332744	0.125	0.625	1
Atg13	0.0245141	-0.394224	0.125	0.625	1
Tsp39D	0.0245141	-0.399492	0.125	0.625	1
CG3223	0.0245141	-0.434724	0.125	0.625	1
Marf	0.0245141	-0.452911	0.125	0.625	1
CG17270	0.0245141	-0.490032	0.125	0.625	1
Ms	0.0260817	-0.523622	0.312	0.875	1
CG6115	0.02631	-0.338525	0.312	1	1
CG42541	0.0265709	-0.333405	0.188	0.75	1
DppIII	0.0265709	-0.347348	0.188	0.75	1
Rpn7	0.0265709	-0.354295	0.188	0.75	1
CG10932	0.0265709	-0.364146	0.188	0.75	1
MFS9	0.0265709	-0.384172	0.188	0.75	1
fog	0.0265709	-0.388697	0.188	0.75	1
D2hgdh	0.0265709	-0.437152	0.188	0.75	1
Galphai	0.0278903	-0.269917	0.062	0.5	1
PCB	0.0278903	-0.299908	0.062	0.5	1
Stat92E	0.0278903	-0.301023	0.062	0.5	1
CG34383	0.0278903	-0.304987	0.062	0.5	1
CG18661	0.0278903	-0.337439	0.062	0.5	1
CG12075	0.0278903	-0.374156	0.062	0.5	1
14-3-3epsilon	0.0296755	0.414768	0.875	1	1
CG17746	0.0298	-0.269774	0.125	0.625	1
HisRS	0.0298	-0.279892	0.125	0.625	1
Ubqn	0.0298	-0.305756	0.125	0.625	1
CG33978	0.0298	-0.306855	0.125	0.625	1
CG34117	0.0298	-0.356224	0.125	0.625	1
CG7927	0.0298	-0.380753	0.125	0.625	1
Den1	0.0298	-0.411403	0.125	0.625	1
Csp	0.0300635	-0.306688	0.25	0.875	1
CG1607	0.0300635	-0.403586	0.25	0.875	1
Rac2	0.0300635	-0.420952	0.25	0.875	1
Mmp1	0.0306935	-0.358291	0.438	0.875	1
CG2246	0.0312611	-0.460917	0.25	0.75	1
pre-rRNA:CR45845	0.0312611	-0.855961	0.25	0.75	1
CG5910	0.0317647	-0.385708	0.188	0.75	1
CG32103	0.0332588	-0.569455	0.625	1	1
smog	0.033434	-0.253376	0.25	1	1
CG9686	0.034343	-0.66674	0.188	0.625	1
CG5174	0.0355089	-0.250308	0.25	0.875	1
Ufd1-like	0.0355089	-0.345786	0.25	0.875	1
CG12655	0.0359091	-0.547507	0.438	0.875	1
SRPK	0.0360377	-0.254699	0.125	0.625	1
CG30285	0.0360377	-0.256873	0.125	0.625	1
shrb	0.0363655	-0.424115	0.312	1	1
mt:ND5	0.0366207	-0.830017	0.5	1	1
lncRNA:CR40469	0.0370366	-0.687665	0.25	0.75	1
Xpc	0.0378058	-0.26151	0.188	0.75	1
CG9917	0.0378058	-0.285644	0.188	0.75	1
CG3760	0.0378058	-0.346368	0.188	0.75	1
CG3209	0.0378058	-0.362158	0.188	0.75	1
Gs2	0.0378058	-0.404404	0.188	0.75	1
Cisd2	0.0378058	-0.659828	0.188	0.75	1
Rab7	0.0388583	-0.389182	0.375	1	1
RpL22	0.0393579	-0.716028	0.688	1	1
cyp33	0.0400993	-0.408023	0.125	0.5	1
mRpL52	0.0417744	-0.294942	0.25	0.875	1
CG6767	0.0417744	-0.338357	0.25	0.875	1
Cyp303a1	0.0417744	-0.350458	0.25	0.875	1
CREG	0.0425171	-0.542326	0.375	0.875	1
Cp1	0.0425171	-0.594983	0.375	0.875	1
snRNP-U1-C	0.0433558	0.276376	0.125	0.625	1
CG15784	0.0433558	-0.28661	0.125	0.625	1
Hsc70-3	0.0433558	-0.322105	0.125	0.625	1
eIF4B	0.0433558	-0.329909	0.125	0.625	1
CR41597	0.0433558	-0.370134	0.125	0.625	1
Galphas	0.0436967	-0.369338	0.25	0.75	1
Usp14	0.0436967	-0.431568	0.25	0.75	1
Hsp83	0.0439161	0.737632	0.812	0.5	1
Ufm1	0.0447977	-0.272124	0.188	0.75	1
betaTub56D	0.044823	0.513869	1	1	1
COQ7	0.0452713	-0.369926	0.375	1	1
CG5854	0.0477967	-0.25444	0	0.25	1
CG9641	0.0477967	-0.25444	0	0.25	1
28SrRNA-Psi:CR40741	0.0477967	-0.255327	0	0.25	1
Nmdar1	0.0477967	-0.264695	0	0.25	1
CG10019	0.0477967	-0.264695	0	0.25	1
Nelf-A	0.0477967	-0.267898	0	0.25	1
phtf	0.0477967	-0.267898	0	0.25	1
CG3009	0.0477967	-0.268195	0	0.25	1
CG10915	0.0477967	-0.270793	0	0.25	1
CG5973	0.0477967	-0.270793	0	0.25	1
mew	0.0477967	-0.270793	0	0.25	1
Hers	0.0477967	-0.280464	0	0.25	1
bol	0.0477967	-0.286175	0	0.25	1
mrt	0.0477967	-0.290873	0	0.25	1
ssh	0.0477967	-0.29361	0	0.25	1
CG5377	0.0477967	-0.29361	0	0.25	1
Ack-like	0.0477967	-0.29361	0	0.25	1
CG9125	0.0477967	-0.29361	0	0.25	1
CG13901	0.0477967	-0.295167	0	0.25	1
BRWD3	0.0477967	-0.295167	0	0.25	1
Bap170	0.0477967	-0.295167	0	0.25	1
numb	0.0477967	-0.295167	0	0.25	1
fand	0.0477967	-0.297707	0	0.25	1
TpnC47D	0.0477967	-0.297707	0	0.25	1
CG10425	0.0477967	-0.302584	0	0.25	1
Dlip1	0.0477967	-0.303143	0	0.25	1
krz	0.0477967	-0.303143	0	0.25	1
CG11534	0.0477967	-0.314484	0	0.25	1
EloA	0.0477967	-0.320286	0	0.25	1
CG34423	0.0477967	-0.320286	0	0.25	1
CG9123	0.0477967	-0.320286	0	0.25	1
CG13204	0.0477967	-0.321759	0	0.25	1
CG7879	0.0477967	-0.322492	0	0.25	1
axo	0.0477967	-0.323272	0	0.25	1
noc	0.0477967	-0.351098	0	0.25	1
CG30001	0.0477967	-0.351098	0	0.25	1
Spt-I	0.0477967	-0.354968	0	0.25	1
CG42232	0.0477967	-0.356649	0	0.25	1
GATAd	0.0477967	-0.356649	0	0.25	1
CG9107	0.0477967	-0.356649	0	0.25	1
CCAP	0.0477967	-0.402161	0	0.25	1
gprs	0.0477967	-0.420868	0	0.25	1
Cyp301a1	0.0477967	-0.448891	0	0.25	1
lt	0.0477967	-0.526817	0	0.25	1
CG6729	0.0477967	-0.550198	0	0.25	1
Ubc7	0.0488282	-0.311795	0.188	0.625	1
CG13124	0.0488282	-0.436168	0.188	0.625	1
Chchd3	0.0488282	-0.504772	0.188	0.625	1
fru	0.0489514	-0.264869	0.25	0.875	1
GstT1	0.0495268	-0.275005	0.312	1	1
tsl	0.0495268	-0.28199	0.375	0.875	1
RapGAP1	0.0495268	-0.428108	0.375	0.875	1
elm	0.0496195	-0.293596	0.312	0.875	1
udd	0.0496195	-0.427173	0.312	0.875	1
Tlk	0.0513413	-0.335869	0.25	0.75	1
Vha44	0.0513413	-0.346252	0.25	0.75	1
ATPsynC	0.0523148	0.402707	1	1	1
heix	0.0523148	-0.469457	1	1	1
mt:lrRNA	0.0523148	-1.12382	1	1	1
Pex14	0.0528501	-0.276549	0.188	0.75	1
ytr	0.0528501	-0.304226	0.188	0.75	1
path	0.053214	-0.658974	0.75	1	1
Fkbp39	0.0571361	0.347926	0.25	0.875	1
Kaz1-ORFB	0.0571361	-0.300378	0.25	0.875	1
arm	0.0571361	-0.341058	0.25	0.875	1
CG14483	0.0574812	-0.347542	0.375	0.875	1
snsl	0.0574812	-0.408347	0.375	0.875	1
nkd	0.0574812	-0.602682	0.375	0.875	1
Prosalpha4	0.0574812	-0.615292	0.375	0.875	1
Pex7	0.0577239	-0.357237	0.312	0.875	1
CG1640	0.0578118	-0.279346	0.188	0.625	1
CG1910	0.0578118	-0.39131	0.188	0.625	1
Hmgcr	0.0578118	-0.564246	0.188	0.625	1
CG11300	0.0585274	0.648606	0.375	0	1
Ppa	0.0585274	-0.290094	0.125	0.5	1
Smg6	0.0585274	-0.344892	0.125	0.5	1
Adf1	0.0585274	-0.476074	0.125	0.5	1
CG5059	0.058638	-0.407337	0.562	1	1
CG40472	0.0593055	-0.268499	0.062	0.375	1
CG9775	0.0593055	-0.309074	0.062	0.375	1
isoQC	0.0593055	-0.326112	0.062	0.375	1
CG3645	0.0593055	-0.360383	0.062	0.375	1
CG40191	0.0593055	-0.375559	0.062	0.375	1
ppl	0.0593055	-0.385667	0.062	0.375	1
Lk	0.0593055	-0.409149	0.062	0.375	1
Rab14	0.0600749	-0.285828	0.25	0.75	1
U2af50	0.0620779	-0.251162	0.188	0.75	1
CG6040	0.0620779	-0.401827	0.25	0.625	1
svp	0.0648839	-0.816726	0.312	0.625	1
CG11275	0.0664284	-0.320503	0.312	0.75	1
CG42748	0.0664284	-0.360453	0.312	0.75	1
Pp1alpha-96A	0.0664702	-0.285296	0.375	0.875	1
Tom20	0.0664702	-0.307953	0.375	0.875	1
CG8009	0.0681284	-0.251074	0.188	0.625	1
CDase	0.0681284	-0.258374	0.188	0.625	1
CG12321	0.0681284	-0.285838	0.188	0.625	1
uzip	0.0681284	-0.324849	0.188	0.625	1
alpha-Cat	0.0700062	-0.253872	0.25	0.75	1
Alg14	0.0700062	-0.253876	0.25	0.75	1
CG3061	0.0700062	-0.309199	0.25	0.75	1
Galphaq	0.0700062	-0.318432	0.25	0.75	1
grn	0.0700062	-0.57088	0.25	0.75	1
Sema1a	0.0701056	-0.259483	0.125	0.5	1
mRpS22	0.0701056	-0.264335	0.125	0.5	1
babo	0.0701056	-0.284633	0.125	0.5	1
CG12065	0.0701056	-0.325689	0.125	0.5	1
CG34125	0.0701056	-0.336605	0.125	0.5	1
Rab8	0.0701056	-0.345551	0.125	0.5	1
dpr13	0.0701056	-0.413586	0.125	0.5	1
Gapdh2	0.0702298	0.515734	0.938	1	1
mt:CoIII	0.0702298	-0.349122	1	1	1
Non1	0.070416	-0.494573	0.562	0.875	1
Es2	0.0731929	-0.255906	0.062	0.375	1
Paics	0.0731929	-0.259788	0.062	0.375	1
CG13671	0.0731929	-0.264806	0.062	0.375	1
tws	0.0731929	-0.273141	0.062	0.375	1
dpr12	0.0731929	-0.273141	0.062	0.375	1
l(1)G0289	0.0731929	-0.274873	0.062	0.375	1
p53	0.0731929	-0.27748	0.062	0.375	1
CG11658	0.0731929	-0.281558	0.062	0.375	1
Fpgs	0.0731929	-0.284	0.062	0.375	1
CG5009	0.0731929	-0.29385	0.062	0.375	1
spoon	0.0731929	-0.294202	0.062	0.375	1
nom	0.0731929	-0.301713	0.062	0.375	1
CG15027	0.0731929	-0.310456	0.062	0.375	1
Rpb5	0.0731929	-0.317038	0.062	0.375	1
GluRIB	0.0731929	-0.328664	0.062	0.375	1
mRpS5	0.0731929	-0.329831	0.062	0.375	1
CstF50	0.0731929	-0.332455	0.062	0.375	1
wmd	0.0731929	-0.37263	0.062	0.375	1
Nopp140	0.0731929	-0.505861	0.062	0.375	1
pix	0.0753986	-0.327936	0.5	1	1
Vha36-1	0.075689	0.445692	0.938	0.875	1
ATPCL	0.0765865	-0.539524	0.438	0.75	1
Mdh1	0.0772439	-0.350342	0.312	0.875	1
CG11811	0.0772439	-0.382059	0.312	0.875	1
SF2	0.0772439	-0.439685	0.312	0.875	1
CG5835	0.0772443	-0.338412	0.562	1	1
Rrp4	0.0799132	-0.278067	0.188	0.625	1
coro	0.0799132	-0.363502	0.188	0.625	1
Fkbp12	0.0808081	0.493907	1	1	1
RpL34a	0.0808081	0.35626	0.938	1	1
CG14945	0.0812466	-0.300397	0.25	0.75	1
Rpt6	0.0828851	-0.416439	0.375	0.75	1
CG12945	0.0835002	-0.253583	0.125	0.5	1
CG10565	0.0835002	-0.260087	0.125	0.5	1
pnut	0.0835002	-0.270535	0.125	0.5	1
CG9674	0.0835002	-0.301459	0.125	0.5	1
CG4266	0.0835002	-0.303958	0.125	0.5	1
ari-1	0.0835002	-0.349784	0.125	0.5	1
Lar	0.0835002	-0.410709	0.125	0.5	1
Hipk	0.0836745	-0.457832	0.5	0.875	1
CG1648	0.0862271	-0.325923	0.5	1	1
spt4	0.0879242	-0.499306	0.438	0.75	1
lbm	0.0879242	-0.543642	0.375	0.875	1
cdc14	0.0887499	-0.257088	0.312	0.75	1
GstS1	0.0887499	-0.726386	0.312	0.75	1
CG14812	0.0888556	-0.252456	0.312	0.875	1
wdb	0.0888556	-0.255182	0.312	0.875	1
CG10189	0.0896344	-0.281631	0.062	0.375	1
CG3156	0.0896344	-0.30523	0.062	0.375	1
CG5033	0.0896344	-0.314113	0.062	0.375	1
VhaM9.7-b	0.0907616	0.582142	0.812	0.75	1
olf186-F	0.0914694	-0.521618	0.75	1	1
Tsp42Ee	0.0920211	-0.368097	0.562	0.875	1
yip2	0.0920945	-0.431151	0.562	0.875	1
Prosbeta3	0.0921062	0.421229	0.875	1	1
CG8498	0.0921184	-0.323718	0.375	1	1
CG6340	0.0933034	-0.268293	0.188	0.625	1
PIP4K	0.0933034	-0.298141	0.188	0.625	1
CG40228	0.0933034	-0.320231	0.188	0.625	1
CG9231	0.0933034	-0.333992	0.188	0.625	1
SmD1	0.0933034	-0.346796	0.188	0.625	1
Moe	0.0939095	-0.252836	0.25	0.75	1
uex	0.0939095	-0.261588	0.25	0.75	1
CG5554	0.0939095	-0.359868	0.25	0.75	1
Prosbeta2	0.0982784	-0.445538	0.5	1	1
CtsB1	0.098423	-0.283549	0.438	0.875	1
AdSS	0.098423	-0.293057	0.438	0.875	1
CG31997	0.100578	-0.381992	0.375	0.875	1
und	0.100578	-0.454269	0.375	0.875	1
Adgf-D	0.10199	-0.306782	0.312	0.75	1
COX5B	0.104258	0.369761	0.875	0.875	1
CNBP	0.104333	0.510016	0.812	1	1
Drat	0.104333	-0.766301	0.812	1	1
VGlut	0.105067	0.535123	0.375	1	1
COX7C	0.105638	0.354642	1	1	1
Rala	0.113167	-0.260106	0.25	0.625	1
Dhit	0.116279	0.260554	0.312	0.875	1
CG12576	0.116279	-0.309211	0.312	0.875	1
Rpt2	0.116279	-0.390313	0.312	0.875	1
CG9436	0.116478	0.336548	0.125	0.5	1
CG11975	0.116478	0.314749	0.125	0.5	1
CG14985	0.116478	0.296171	0.125	0.5	1
Trs33	0.116478	0.289295	0.125	0.5	1
CG8206	0.116478	0.285579	0.125	0.5	1
Stlk	0.116478	0.284899	0.125	0.5	1
Mys45A	0.116478	0.274589	0.125	0.5	1
mRpL51	0.116478	0.252868	0.125	0.5	1
CG31324	0.116478	-0.460634	0.125	0.5	1
Syx1A	0.118074	0.619157	0.812	1	1
AdenoK	0.118074	-0.390357	0.812	1	1
Got1	0.118836	-0.745238	0.562	0.875	1
eIF2alpha	0.119421	-0.404353	0.375	1	1
hdc	0.123304	-0.347264	0.438	1	1
rgr	0.126393	-0.275526	0.5	1	1
ND-39	0.127152	-0.341894	0.438	0.875	1
Prosalpha2	0.128783	-0.324865	0.562	1	1
Lam	0.130099	-0.322207	0.25	0.625	1
Rpt4	0.130212	-0.277141	0.375	0.875	1
CG3776	0.132287	-0.277038	0.312	0.875	1
UQCR-14	0.132688	0.390646	0.75	1	1
ReepB	0.133365	-0.311482	0.875	1	1
SdhC	0.135829	0.514617	1	1	1
Pglym78	0.139367	0.779966	0.688	0.5	1
Mapmodulin	0.139367	-0.271582	0.438	1	1
Prosalpha3	0.139367	-0.320263	0.5	0.875	1
Gel	0.140907	-0.270049	0.375	0.75	1
mt:ND6	0.140907	-0.478467	0.375	0.75	1
CG1907	0.141559	0.426728	0.25	0.75	1
CG3527	0.141559	0.25991	0.25	0.75	1
ArgRS	0.143854	0.655006	0.25	0	1
Csl4	0.143854	0.624207	0.25	0	1
Gclm	0.143854	0.508319	0.25	0	1
mad2	0.143854	0.378424	0.25	0	1
lncRNA:CR31451	0.144476	0.545505	0.188	0.625	1
CG6195	0.144476	0.358991	0.188	0.625	1
scrt	0.144476	0.262093	0.188	0.625	1
Idgf4	0.147016	0.635328	0.75	0.75	1
Fatp	0.147373	-0.387623	0.375	0.875	1
Fas2	0.148353	-0.446867	0.75	0.875	1
mRpL33	0.148934	-0.290882	0.25	0.625	1
CG34159	0.148934	-0.316137	0.25	0.625	1
cg	0.151274	-0.334564	0.312	0.75	1
ATPsynE	0.158089	0.461001	0.812	0.875	1
Ubr3	0.161024	0.377354	0.25	0.75	1
spen	0.166306	-0.272097	0.688	1	1
fry	0.166399	-0.318188	0.688	1	1
CG42319	0.167883	-0.452055	0.812	1	1
smt3	0.168068	0.399523	0.875	1	1
Nipped-B	0.169361	0.31335	0.312	0.875	1
Spase12	0.171773	0.994041	0.625	0.5	1
Dak1	0.171773	0.623452	0.625	0.5	1
Aldh-III	0.171928	-0.273552	1	1	1
Roc1a	0.176871	0.511227	0.812	0.875	1
CG7834	0.179745	-0.31367	0.375	0.75	1
meso18E	0.181373	-0.27412	0.125	0.375	1
unk	0.182159	-0.356608	0.188	0.5	1
fne	0.182556	0.697835	0.75	0.625	1
CG4281	0.184898	-0.272291	0	0.125	1
stg	0.184898	-0.272291	0	0.125	1
CG13707	0.184898	-0.272291	0	0.125	1
Sld5	0.184898	-0.272291	0	0.125	1
ths	0.184898	-0.272291	0	0.125	1
kn	0.184898	-0.272291	0	0.125	1
lncRNA:CR43611	0.184898	-0.272291	0	0.125	1
slp1	0.184898	-0.272291	0	0.125	1
Gen	0.184898	-0.272291	0	0.125	1
CG7231	0.184898	-0.272291	0	0.125	1
Ets97D	0.184898	-0.272291	0	0.125	1
Galk	0.184898	-0.272291	0	0.125	1
CG4733	0.184898	-0.272291	0	0.125	1
CG43103	0.184898	-0.272291	0	0.125	1
CG12219	0.184898	-0.272291	0	0.125	1
asRNA:CR45501	0.184898	-0.272291	0	0.125	1
Tfb4	0.184898	-0.272291	0	0.125	1
CG14695	0.184898	-0.272291	0	0.125	1
lncRNA:CR46006	0.184898	-0.272291	0	0.125	1
CG10903	0.184898	-0.272291	0	0.125	1
TfIIFbeta	0.184898	-0.272291	0	0.125	1
slp2	0.184898	-0.272291	0	0.125	1
tum	0.184898	-0.272291	0	0.125	1
CR43100	0.184898	-0.272291	0	0.125	1
CG32428	0.184898	-0.486085	0	0.125	1
lncRNA:CR45646	0.184898	-0.677479	0	0.125	1
Dbi	0.186047	0.571112	0.75	0.875	1
vvl	0.187876	-0.375516	0.875	1	1
CG11444	0.190595	0.359478	0.312	0.875	1
Sam-S	0.192356	-0.283838	1	1	1
cu	0.192356	-0.30529	1	1	1
cpo	0.192356	-0.36032	0.938	1	1
Rpb10	0.19307	0.669529	0.5	0.375	1
Rpn6	0.20192	-0.258052	0.375	0.75	1
Msr-110	0.20192	-0.316112	0.375	0.75	1
CG7461	0.203555	-0.305177	0.438	0.875	1
cv-c	0.203753	-0.372907	0.562	1	1
Idgf3	0.205862	-0.29484	0.625	1	1
ben	0.20736	0.326641	0.75	0.875	1
Mkp3	0.20736	-0.330972	0.688	1	1
CG17646	0.20736	-0.6489	0.75	0.875	1
CG7668	0.208427	-0.270935	0.188	0.5	1
Karybeta3	0.208427	-0.331503	0.188	0.5	1
chic	0.20895	0.347423	0.812	1	1
Jwa	0.209228	-0.277962	0.375	0.875	1
CG4598	0.209228	-0.399046	0.438	0.75	1
Imp	0.209248	0.331445	0.875	1	1
CG9596	0.211185	-0.269892	0.125	0.375	1
sna	0.211185	-0.302134	0.125	0.375	1
Pdk	0.212126	-0.279549	0.562	0.875	1
AcCoAS	0.212126	-0.364195	0.562	0.875	1
CG12262	0.212126	-0.387884	0.562	0.875	1
mt:ND2	0.213728	-0.520871	0.438	0.625	1
ND-AGGG	0.216903	-0.325963	0.375	0.625	1
Pdi	0.217139	0.317388	0.688	0.875	1
CG11486	0.219991	-0.351813	0.5	0.875	1
papi	0.220539	0.647665	0.188	0	1
CG18135	0.220539	0.622148	0.188	0	1
CTPsyn	0.220539	0.572267	0.188	0	1
CG34445	0.220539	0.51573	0.188	0	1
tup	0.220539	0.491623	0.188	0	1
metro	0.220539	0.491623	0.188	0	1
qless	0.220539	0.462273	0.188	0	1
beag	0.220539	0.444561	0.188	0	1
Bka	0.220539	0.431988	0.188	0	1
Hus1-like	0.220539	0.424606	0.188	0	1
fj	0.220539	0.415519	0.188	0	1
SPARC	0.220539	0.400436	0.188	0	1
Lcp65Ag2	0.220539	0.399272	0.188	0	1
Con	0.220539	0.390613	0.188	0	1
CG1234	0.220539	0.37744	0.188	0	1
Nnf1a	0.220539	0.363938	0.188	0	1
Det	0.220539	0.295994	0.188	0	1
CG42392	0.220539	-0.268939	0.062	0.25	1
CG11158	0.220539	-0.290573	0.062	0.25	1
Cerk	0.220539	-0.350128	0.062	0.25	1
Rb97D	0.220539	-0.3609	0.062	0.25	1
CG14989	0.223776	-0.357411	0.5	1	1
Sod1	0.238141	0.289296	0.938	1	1
CG12163	0.238141	-0.276633	1	1	1
Xbp1	0.248434	-0.272604	0.5	1	1
SC35	0.252119	-0.31348	0.375	0.75	1
UQCR-C2	0.253617	-0.323209	0.625	1	1
ATPsyndelta	0.257157	0.405513	0.875	1	1
lolal	0.259784	-0.258963	0.438	0.75	1
CG3548	0.263325	0.316395	0.062	0.25	1
glo	0.263325	0.29466	0.062	0.25	1
z	0.263325	0.284789	0.062	0.25	1
CG2064	0.268974	0.379263	0.188	0.5	1
ttm50	0.268974	0.319413	0.188	0.5	1
CG9650	0.268974	0.316225	0.188	0.5	1
RNaseX25	0.268974	0.272526	0.188	0.5	1
Pkc53E	0.281098	0.590312	0.125	0.375	1
Ance	0.281098	0.567603	0.125	0.375	1
wuho	0.281098	0.418454	0.125	0.375	1
dikar	0.281098	0.41423	0.125	0.375	1
scrib	0.281098	0.40897	0.125	0.375	1
CG18473	0.281098	0.395398	0.125	0.375	1
SRm160	0.281098	0.378502	0.125	0.375	1
CG17565	0.281098	0.372158	0.125	0.375	1
CG8481	0.281098	0.344615	0.125	0.375	1
Vhl	0.281098	0.339505	0.125	0.375	1
mRpL11	0.281098	0.334032	0.125	0.375	1
alpha4GT1	0.281098	0.331998	0.125	0.375	1
slo	0.281098	0.323844	0.125	0.375	1
Piezo	0.281098	0.322577	0.125	0.375	1
Nf1	0.281098	0.320714	0.125	0.375	1
CG5346	0.281098	0.312979	0.125	0.375	1
Ts	0.281098	0.312179	0.125	0.375	1
CG12118	0.281098	0.311362	0.125	0.375	1
beg	0.281098	0.310853	0.125	0.375	1
EbpIII	0.281098	0.302266	0.125	0.375	1
Pnn	0.281098	0.301198	0.125	0.375	1
CG3918	0.281098	0.299368	0.125	0.375	1
pico	0.281098	0.296865	0.125	0.375	1
Vsp37A	0.281098	0.284662	0.125	0.375	1
Arpc2	0.281098	0.282351	0.125	0.375	1
CG4045	0.281098	0.279684	0.125	0.375	1
CG1371	0.281098	0.27672	0.125	0.375	1
l(2)not	0.281098	0.274264	0.125	0.375	1
CG1427	0.281098	0.272784	0.125	0.375	1
CG42495	0.281098	0.270662	0.125	0.375	1
qm	0.281098	0.266578	0.125	0.375	1
Gbp1	0.281098	0.262374	0.125	0.375	1
Lnk	0.281098	0.258316	0.125	0.375	1
tna	0.290747	-0.267327	1	1	1
CG7841	0.294157	-0.335394	0.688	0.875	1
CG17691	0.296702	0.363251	0.812	0.875	1
Gk1	0.303389	0.442209	0.188	0.5	1
trv	0.303389	0.425276	0.188	0.5	1
cm	0.303389	0.401598	0.188	0.5	1
RpLP0-like	0.303389	0.386844	0.188	0.5	1
Prat2	0.303389	0.367126	0.188	0.5	1
Baldspot	0.303389	0.329105	0.188	0.5	1
CG8726	0.303389	0.300538	0.188	0.5	1
Hsp23	0.303389	0.298847	0.188	0.5	1
Gs1l	0.303389	0.280986	0.188	0.5	1
CG11208	0.303389	0.272076	0.188	0.5	1
Vha55	0.305086	-0.27219	0.312	0.625	1
Rpn1	0.307313	0.516233	0.25	0.625	1
CG11454	0.307313	0.310284	0.25	0.625	1
Mlf	0.307313	0.25315	0.25	0.625	1
Hrb27C	0.308587	-0.356743	0.625	1	1
maf-S	0.310184	0.287228	0.688	1	1
Chd64	0.310423	-0.263013	0.375	0.75	1
mt:Cyt-b	0.319629	-0.284964	1	1	1
Bin1	0.324602	0.663558	0.375	0.25	1
Bx42	0.333134	0.263438	0.312	0.75	1
Taf13	0.33405	-0.335047	0.188	0.375	1
crol	0.336578	-0.362155	0.562	1	1
brn	0.338232	0.684543	0.125	0	1
CG9813	0.338232	0.474476	0.125	0	1
E(z)	0.338232	0.460599	0.125	0	1
CG10050	0.338232	0.420439	0.125	0	1
Gasp	0.338232	0.420439	0.125	0	1
CG3808	0.338232	0.420439	0.125	0	1
CG11722	0.338232	0.393294	0.125	0	1
srl	0.338232	0.391646	0.125	0	1
tant	0.338232	0.364053	0.125	0	1
sol	0.338232	0.350303	0.125	0	1
CG14408	0.338232	0.347477	0.125	0	1
Optix	0.338232	0.338418	0.125	0	1
tap	0.338232	0.338418	0.125	0	1
CG11413	0.338232	0.328087	0.125	0	1
CG6495	0.338232	0.325622	0.125	0	1
CG11317	0.338232	0.325346	0.125	0	1
bsf	0.338232	0.325346	0.125	0	1
CG14353	0.338232	0.325346	0.125	0	1
nAChRbeta3	0.338232	0.320439	0.125	0	1
CG15646	0.338232	0.312109	0.125	0	1
lncRNA:CR45312	0.338232	0.308636	0.125	0	1
CG15439	0.338232	0.308636	0.125	0	1
nompA	0.338232	0.304892	0.125	0	1
5PtaseI	0.338232	0.29289	0.125	0	1
Trf	0.338232	0.289349	0.125	0	1
Adat1	0.338232	0.289349	0.125	0	1
Usf	0.338232	0.287972	0.125	0	1
Jon99Fii	0.338232	0.286611	0.125	0	1
asRNA:CR44512	0.338232	0.276241	0.125	0	1
CG4587	0.338459	0.828779	0.438	0.375	1
eIF4G1	0.338459	0.475964	0.438	0.375	1
alphaTub84D	0.340391	0.743153	0.562	0.625	1
CG17734	0.340391	0.719954	0.562	0.625	1
Rae1	0.341873	0.450058	0.25	0.625	1
mfas	0.341873	0.438617	0.25	0.625	1
CG34242	0.341873	0.350499	0.25	0.625	1
MED31	0.341873	0.339604	0.25	0.625	1
MED21	0.341873	0.304148	0.25	0.625	1
Tim8	0.341873	0.285267	0.25	0.625	1
CG15019	0.342674	0.642074	0.5	0.5	1
COX7A	0.350279	0.339545	1	0.875	1
CG6426	0.350279	-0.376215	1	1	1
Prosbeta4	0.357174	0.377749	0.812	0.875	1
nAChRalpha6	0.365671	0.86193	0.625	0.75	1
SNRPG	0.368679	0.458623	0.625	0.875	1
Lk6	0.373532	-0.2588	0.75	1	1
Ldh	0.373555	0.481056	0.562	0.625	1
cl	0.373555	-0.470461	0.438	0.875	1
Jafrac1	0.374469	0.294263	0.875	1	1
CHOp24	0.376991	0.260544	0.375	0.75	1
CG5919	0.382604	0.365861	1	1	1
glob1	0.390863	-0.399354	0.5	0.75	1
dnc	0.395797	0.397931	0.625	0.625	1
hoip	0.401407	0.587521	0.375	0.25	1
ND-B12	0.408649	-0.325023	0.438	0.875	1
lqf	0.411948	0.292551	0.312	0.625	1
qvr	0.412689	0.830737	0.25	0.125	1
CG16986	0.412689	0.670585	0.25	0.125	1
Exo70	0.412689	0.621872	0.25	0.125	1
Ote	0.412689	0.58305	0.25	0.125	1
CG32176	0.412689	0.482066	0.25	0.125	1
Rox8	0.412689	0.46627	0.25	0.125	1
PQBP1	0.412689	0.462225	0.25	0.125	1
cag	0.412689	0.42624	0.25	0.125	1
put	0.412689	0.416598	0.25	0.125	1
GAPsec	0.412689	0.38551	0.25	0.125	1
CG6182	0.412689	0.354627	0.25	0.125	1
Ns4	0.412689	0.251142	0.25	0.125	1
jeb	0.41335	0.463801	0.5	0.5	1
REG	0.41335	0.364143	0.375	0.75	1
Ldsdh1	0.41665	0.399493	1	1	1
Desat1	0.422431	-0.31498	0.688	0.875	1
ND-13B	0.435486	0.320972	0.625	0.75	1
mbl	0.442003	0.578213	0.75	0.875	1
Rap1	0.442003	0.541466	0.75	0.875	1
Gapdh1	0.443598	0.27942	0.875	0.875	1
CG11665	0.451993	0.427464	0.312	0.625	1
dysc	0.451993	0.352099	0.312	0.625	1
CG7637	0.451993	0.278924	0.312	0.625	1
Nph	0.458975	0.938841	0.5	0.625	1
CG10674	0.458975	0.501092	0.5	0.625	1
CG17726	0.463594	0.328199	0.25	0.125	1
Tsp42El	0.469464	0.441085	0.625	0.625	1
GstE12	0.469464	0.410174	0.625	0.625	1
Rdl	0.473096	0.483194	0.625	0.75	1
AGO1	0.47587	0.31386	0.625	0.875	1
GstD1	0.481195	0.348511	0.875	1	1
porin	0.481195	0.334655	0.875	1	1
CG7630	0.481195	0.318809	0.875	1	1
mRpL38	0.492001	0.30472	0.5	0.5	1
Sh	0.494149	0.81054	0.438	0.375	1
Ntf-2	0.498951	0.80911	0.5	0.625	1
CG11791	0.498951	0.546702	0.5	0.625	1
CG30423	0.498951	0.476093	0.438	0.75	1
Chchd2	0.515069	0.28256	0.625	0.875	1
Vmat	0.516979	1.95219	0.312	0.25	1
Abl	0.516979	0.632069	0.312	0.25	1
CG8360	0.516979	0.630078	0.312	0.25	1
CG32069	0.516979	0.619501	0.312	0.25	1
Su(P)	0.516979	0.539806	0.312	0.25	1
x16	0.516979	0.508137	0.312	0.25	1
Ibf2	0.516979	0.446493	0.312	0.25	1
AlaRS	0.516979	0.445043	0.312	0.25	1
CG3097	0.516979	0.416182	0.312	0.25	1
hrg	0.516979	0.273104	0.312	0.25	1
dpr7	0.519581	0.392662	0.188	0.375	1
CG32409	0.519581	0.382642	0.188	0.375	1
CG10731	0.519581	0.302094	0.188	0.375	1
CG4603	0.519581	0.269199	0.188	0.375	1
drongo	0.519581	0.257823	0.188	0.375	1
Galphao	0.52504	0.418673	0.438	0.875	1
CG14207	0.526022	0.722938	0.438	0.5	1
CG17454	0.526022	0.667909	0.438	0.5	1
Vha68-2	0.526022	0.655477	0.438	0.5	1
Gug	0.526022	0.582998	0.438	0.5	1
CG12107	0.526022	0.46996	0.438	0.5	1
CG32276	0.534146	0.517537	0.375	0.75	1
CG31937	0.535117	0.329688	0.25	0.5	1
CG2846	0.535117	0.317333	0.25	0.5	1
Dhpr	0.535117	0.311395	0.25	0.5	1
P32	0.535117	0.311074	0.25	0.5	1
NaPi-III	0.535117	0.281069	0.25	0.5	1
CG12848	0.538322	0.385582	0.312	0.625	1
Acyp2	0.538322	0.385038	0.312	0.625	1
CG3792	0.538322	0.358301	0.312	0.625	1
SmF	0.538322	0.302	0.312	0.625	1
CCT3	0.538322	0.255867	0.312	0.625	1
eEF1delta	0.540705	0.666911	0.5	0.625	1
CG13807	0.549543	0.682451	0.375	0.375	1
SrpRbeta	0.549543	0.642164	0.375	0.375	1
Drak	0.549543	0.599338	0.375	0.375	1
Scox	0.549543	0.575369	0.375	0.375	1
CG4972	0.549543	0.507511	0.375	0.375	1
CG17776	0.549543	0.438721	0.375	0.375	1
Rpt3	0.550048	0.364539	0.562	0.75	1
Arf102F	0.555883	0.376102	0.625	0.875	1
Smr	0.555883	0.335956	0.625	0.875	1
roh	0.560391	0.308422	0.812	1	1
SdhB	0.567298	0.511794	0.562	0.625	1
Caper	0.567476	0.518131	0.312	0.25	1
kuk	0.567476	0.437522	0.312	0.25	1
CG14818	0.570481	0.54031	0.438	0.5	1
Tob	0.573099	0.474607	0.188	0.375	1
olf186-M	0.573099	0.469487	0.188	0.375	1
HP1c	0.573099	0.458187	0.188	0.375	1
row	0.573099	0.453622	0.188	0.375	1
CG12096	0.573099	0.450513	0.188	0.375	1
lin-28	0.573099	0.417975	0.188	0.375	1
CG42613	0.573099	0.406977	0.188	0.375	1
loqs	0.573099	0.402415	0.188	0.375	1
sra	0.573099	0.397682	0.188	0.375	1
Bet1	0.573099	0.395121	0.188	0.375	1
Vps13	0.573099	0.393944	0.188	0.375	1
Spx	0.573099	0.390017	0.188	0.375	1
P5cr	0.573099	0.365464	0.188	0.375	1
CG11980	0.573099	0.364372	0.188	0.375	1
pes	0.573099	0.362981	0.188	0.375	1
DCP1	0.573099	0.361738	0.188	0.375	1
Sur-8	0.573099	0.343249	0.188	0.375	1
Atg3	0.573099	0.336882	0.188	0.375	1
CG1646	0.573099	0.33504	0.188	0.375	1
CG4287	0.573099	0.334628	0.188	0.375	1
Arl5	0.573099	0.327676	0.188	0.375	1
CG32486	0.573099	0.324802	0.188	0.375	1
Chrac-14	0.573099	0.320577	0.188	0.375	1
nAChRalpha2	0.573099	0.317236	0.188	0.375	1
OstDelta	0.573099	0.311011	0.188	0.375	1
CG7607	0.573099	0.309965	0.188	0.375	1
CG2519	0.573099	0.309367	0.188	0.375	1
Fdx2	0.573099	0.301166	0.188	0.375	1
Nmt	0.573099	0.297583	0.188	0.375	1
I-2	0.573099	0.29739	0.188	0.375	1
RPA2	0.573099	0.294136	0.188	0.375	1
CG10375	0.573099	0.29127	0.188	0.375	1
NKAIN	0.573099	0.287604	0.188	0.375	1
CycY	0.573099	0.286462	0.188	0.375	1
Sin3A	0.573099	0.28461	0.188	0.375	1
tow	0.573099	0.276955	0.188	0.375	1
Archease	0.573099	0.275809	0.188	0.375	1
CG3420	0.573099	0.266451	0.188	0.375	1
Nmdmc	0.573099	0.263497	0.188	0.375	1
atms	0.573099	0.256379	0.188	0.375	1
Sap30	0.573099	0.252711	0.188	0.375	1
Eip55E	0.578041	0.325903	0.375	0.75	1
Indy	0.578041	0.2748	0.375	0.75	1
TORIP	0.584209	0.60143	0.25	0.5	1
Sms	0.584209	0.547229	0.25	0.5	1
GIIIspla2	0.584209	0.497162	0.25	0.5	1
Mi-2	0.584209	0.458847	0.25	0.5	1
CG43340	0.584209	0.420442	0.25	0.5	1
CG7275	0.584209	0.386833	0.25	0.5	1
CG8038	0.584209	0.376749	0.25	0.5	1
Tsp66E	0.584209	0.37289	0.25	0.5	1
CG14696	0.584209	0.362525	0.25	0.5	1
bonsai	0.584209	0.355687	0.25	0.5	1
Uch-L5	0.584209	0.351816	0.25	0.5	1
CG17716	0.584209	0.344446	0.25	0.5	1
CG11279	0.584209	0.341281	0.25	0.5	1
Syt1	0.584209	0.322956	0.25	0.5	1
CG10166	0.584209	0.311801	0.25	0.5	1
tgo	0.584209	0.310369	0.25	0.5	1
Got2	0.584209	0.309414	0.25	0.5	1
Srp9	0.584209	0.304033	0.25	0.5	1
CG6966	0.584209	0.302229	0.25	0.5	1
Rab39	0.584209	0.293803	0.25	0.5	1
Idh3b	0.584209	0.28317	0.25	0.5	1
Cals	0.584209	0.281878	0.25	0.5	1
Dyrk2	0.584209	0.269787	0.25	0.5	1
l(1)G0320	0.584209	0.262536	0.25	0.5	1
Updo	0.584209	0.261341	0.25	0.5	1
epsilonCOP	0.584209	0.260672	0.25	0.5	1
CG32767	0.584393	0.409293	0.312	0.625	1
Rpn2	0.584393	0.343256	0.312	0.625	1
Alg11	0.584393	0.305944	0.312	0.625	1
CSN5	0.584393	0.305455	0.312	0.625	1
CG7484	0.584393	0.296344	0.312	0.625	1
igl	0.592891	0.401165	0.562	0.75	1
Cngl	0.597472	0.903855	0.375	0.375	1
Hsp60A	0.597472	0.605286	0.375	0.375	1
CG9319	0.597472	0.544471	0.375	0.375	1
VhaPPA1-1	0.599915	0.287227	0.625	1	1
Gip	0.60402	0.43809	0.125	0.25	1
beat-VI	0.60402	0.43052	0.125	0.25	1
Cortactin	0.60402	0.414145	0.125	0.25	1
trol	0.60402	0.405848	0.125	0.25	1
noi	0.60402	0.403566	0.125	0.25	1
tho2	0.60402	0.395101	0.125	0.25	1
CG2889	0.60402	0.391529	0.125	0.25	1
ocm	0.60402	0.390349	0.125	0.25	1
Ranbp16	0.60402	0.377962	0.125	0.25	1
CG10217	0.60402	0.375694	0.125	0.25	1
Task6	0.60402	0.363977	0.125	0.25	1
Membrin	0.60402	0.363423	0.125	0.25	1
Pde6	0.60402	0.360838	0.125	0.25	1
CG32099	0.60402	0.359245	0.125	0.25	1
Tcs3	0.60402	0.346993	0.125	0.25	1
Sec22	0.60402	0.344171	0.125	0.25	1
prominin-like	0.60402	0.34363	0.125	0.25	1
Lcch3	0.60402	0.341758	0.125	0.25	1
CG11920	0.60402	0.337357	0.125	0.25	1
CG43867	0.60402	0.337064	0.125	0.25	1
CG9945	0.60402	0.332459	0.125	0.25	1
Golgin245	0.60402	0.332135	0.125	0.25	1
CG5287	0.60402	0.329745	0.125	0.25	1
CG17597	0.60402	0.32697	0.125	0.25	1
CG14024	0.60402	0.322243	0.125	0.25	1
Su(var)2-10	0.60402	0.310456	0.125	0.25	1
Hmt4-20	0.60402	0.302977	0.125	0.25	1
GramD1B	0.60402	0.301191	0.125	0.25	1
Sgt1	0.60402	0.29817	0.125	0.25	1
metl	0.60402	0.296265	0.125	0.25	1
CG3163	0.60402	0.289983	0.125	0.25	1
CG9220	0.60402	0.289685	0.125	0.25	1
CG13896	0.60402	0.288673	0.125	0.25	1
Tango1	0.60402	0.285274	0.125	0.25	1
Arp3	0.60402	0.285212	0.125	0.25	1
DnaJ-1	0.60402	0.283065	0.125	0.25	1
beat-Va	0.60402	0.281965	0.125	0.25	1
lqfR	0.60402	0.281965	0.125	0.25	1
CG15432	0.60402	0.281175	0.125	0.25	1
CG10413	0.60402	0.281125	0.125	0.25	1
CG15602	0.60402	0.2801	0.125	0.25	1
foi	0.60402	0.2801	0.125	0.25	1
lncRNA:CR46064	0.60402	0.275404	0.125	0.25	1
prc	0.60402	0.271928	0.125	0.25	1
PIG-F	0.60402	0.27168	0.125	0.25	1
CG11504	0.60402	0.270036	0.125	0.25	1
CG34213	0.60402	0.262598	0.125	0.25	1
Mon1	0.60402	0.261361	0.125	0.25	1
CG11523	0.60402	0.259806	0.125	0.25	1
CCT1	0.60402	0.258235	0.125	0.25	1
Uhg1	0.60402	0.257808	0.125	0.25	1
Dscam3	0.60402	0.257441	0.125	0.25	1
fsd	0.60402	0.255093	0.125	0.25	1
salr	0.60402	0.253189	0.125	0.25	1
Rabex-5	0.60402	0.251647	0.125	0.25	1
CG17765	0.611036	0.412271	0.562	0.625	1
prtp	0.611119	0.454425	0.562	0.625	1
CG13928	0.616655	0.683078	0.438	0.5	1
Pfdn1	0.616655	0.50702	0.438	0.5	1
Hsp67Bc	0.616655	0.474666	0.438	0.5	1
CG13220	0.616655	0.434202	0.438	0.5	1
Prx3	0.616655	0.265412	0.375	0.625	1
eIF3e	0.617711	0.308055	0.562	0.875	1
Socs36E	0.623563	0.320473	0.375	0.75	1
DCTN3-p24	0.632218	0.499629	0.312	0.625	1
SsRbeta	0.632218	0.481077	0.312	0.625	1
CG9588	0.632218	0.421475	0.312	0.625	1
nocte	0.632218	0.37468	0.312	0.625	1
Grx1	0.632218	0.343044	0.312	0.625	1
CG3939	0.632218	0.256883	0.312	0.625	1
CG5326	0.635317	-0.37962	0.188	0.25	1
TBPH	0.637298	0.63495	0.188	0.125	1
rtet	0.637298	0.601181	0.188	0.125	1
CG5787	0.637298	0.582602	0.188	0.125	1
RpI12	0.637298	0.575422	0.188	0.125	1
CG9004	0.637298	0.505274	0.188	0.125	1
Rat1	0.637298	0.470996	0.188	0.125	1
CG31142	0.637298	0.466868	0.188	0.125	1
fz	0.637298	0.460705	0.188	0.125	1
O-fut1	0.637298	0.443636	0.188	0.125	1
CG6724	0.637298	0.422719	0.188	0.125	1
Cyp6u1	0.637298	0.412053	0.188	0.125	1
l(2)k10201	0.637298	0.398573	0.188	0.125	1
Syngr	0.637298	0.356629	0.188	0.125	1
disco	0.637298	0.353679	0.188	0.125	1
CG1622	0.637298	0.347735	0.188	0.125	1
Syn	0.637298	0.345553	0.188	0.125	1
CG14057	0.637298	0.344632	0.188	0.125	1
CG1703	0.637298	0.343939	0.188	0.125	1
phol	0.637298	0.342946	0.188	0.125	1
Cyp9f2	0.637298	0.342768	0.188	0.125	1
side-II	0.637298	0.328864	0.188	0.125	1
rept	0.637298	0.316802	0.188	0.125	1
Pdf	0.637298	0.291895	0.188	0.125	1
CG1407	0.637298	0.28925	0.188	0.125	1
Pym	0.637298	0.287032	0.188	0.125	1
Fkbp14	0.637298	0.263288	0.188	0.125	1
Sirup	0.64195	0.317723	0.688	0.75	1
ND-30	0.64195	0.311528	0.625	0.875	1
Vha26	0.64195	0.254052	0.688	0.75	1
Nplp2	0.645315	0.287468	0.75	1	1
Nlp	0.645746	0.281357	0.812	1	1
Uch	0.647215	0.457681	0.375	0.375	1
CG3625	0.664397	0.7152	0.438	0.5	1
IP3K1	0.664397	0.611806	0.438	0.5	1
CG13737	0.674997	0.730452	0.312	0.25	1
CG6180	0.675535	0.631745	0.5	0.625	1
alphaSnap	0.675535	0.365624	0.5	0.625	1
CG1354	0.679435	0.369399	0.5	0.75	1
Tim17b	0.68258	0.37486	0.562	0.75	1
Prosap	0.682649	0.521619	0.562	0.75	1
CG10576	0.682649	0.385587	0.562	0.75	1
bip2	0.682649	0.361895	0.562	0.75	1
CG13887	0.686964	0.292762	0.625	0.875	1
bru3	0.689316	0.464912	0.688	1	1
Tina-1	0.689316	0.353315	0.75	0.875	1
SdhD	0.690535	0.327781	0.875	1	1
Pli	0.698587	0.304935	0.312	0.5	1
Ndae1	0.701671	0.348669	0.062	0.125	1
Ror	0.701671	0.345359	0.062	0.125	1
ham	0.701671	0.345359	0.062	0.125	1
imd	0.701671	0.276052	0.062	0.125	1
CG10286	0.701671	0.251623	0.062	0.125	1
eag	0.701671	0.251623	0.062	0.125	1
Dsor1	0.701671	0.251279	0.062	0.125	1
lncRNA:CR44831	0.701671	0.251279	0.062	0.125	1
dnk	0.706037	0.351246	0.188	0.125	1
CG1575	0.706037	0.348452	0.188	0.125	1
svr	0.706037	0.310936	0.188	0.125	1
SelT	0.711195	0.356226	0.688	0.875	1
mRpL34	0.718903	0.492474	0.375	0.75	1
D1	0.718903	0.430557	0.375	0.75	1
Tet	0.718903	0.400956	0.375	0.75	1
Ran	0.718903	0.359061	0.375	0.75	1
Ostgamma	0.726656	0.613788	0.5	0.75	1
Mgstl	0.72938	0.30839	0.562	0.75	1
CG4390	0.72938	0.297381	0.562	0.75	1
VhaM9.7-c	0.73155	0.27228	0.25	0.375	1
lark	0.743513	0.753968	0.438	0.625	1
tko	0.743513	0.641019	0.438	0.625	1
Taf10b	0.743513	0.607526	0.438	0.625	1
CG8635	0.743513	0.547626	0.438	0.625	1
CG8778	0.743513	0.536329	0.438	0.625	1
CG32264	0.751378	0.727548	0.312	0.5	1
CG11000	0.751378	0.319895	0.375	0.375	1
CG4577	0.751378	0.317244	0.312	0.5	1
Manf	0.751378	0.311207	0.312	0.5	1
mRpL27	0.751378	0.271378	0.312	0.5	1
tsu	0.75509	0.371241	0.562	0.875	1
l(3)neo38	0.763904	0.437807	0.375	0.625	1
CG3308	0.763904	0.3201	0.375	0.625	1
nSyb	0.768388	0.400061	0.5	0.5	1
endos	0.771989	0.311199	0.438	0.75	1
Pfdn5	0.774864	0.405387	0.5	0.75	1
CG9947	0.778138	0.816725	0.25	0.25	1
Nlg2	0.778138	0.789981	0.25	0.25	1
CG11858	0.778138	0.679467	0.25	0.25	1
jus	0.778138	0.663424	0.25	0.25	1
VAChT	0.778138	0.652176	0.25	0.25	1
dpr8	0.778138	0.537201	0.25	0.25	1
alphaCOP	0.778138	0.534416	0.25	0.25	1
CG4210	0.778138	0.528478	0.25	0.25	1
CG2918	0.778138	0.501278	0.25	0.25	1
CG5323	0.778138	0.491114	0.25	0.25	1
CG14184	0.778138	0.482491	0.25	0.25	1
CG8223	0.778138	0.481618	0.25	0.25	1
nudC	0.778138	0.474727	0.25	0.25	1
rad50	0.778138	0.472492	0.25	0.25	1
CG13877	0.778138	0.470587	0.25	0.25	1
CG9422	0.778138	0.468936	0.25	0.25	1
CG12795	0.778138	0.440445	0.25	0.25	1
Usp5	0.778138	0.439119	0.25	0.25	1
Syt7	0.778138	0.42856	0.25	0.25	1
Nup44A	0.778138	0.420977	0.25	0.25	1
wech	0.778138	0.419445	0.25	0.25	1
CG11583	0.778138	0.36073	0.25	0.25	1
CG9919	0.778138	0.357722	0.25	0.25	1
Sod3	0.778138	0.347639	0.25	0.25	1
CG14613	0.778138	0.282655	0.25	0.25	1
Cpr	0.778138	0.251299	0.25	0.25	1
opm	0.778138	0.250538	0.25	0.25	1
cib	0.778908	0.300978	0.625	0.75	1
lncRNA:Hsromega	0.780256	0.362764	0.625	0.875	1
BI-1	0.781251	0.316014	0.625	1	1
babos	0.781954	0.349329	0.688	1	1
mRpL48	0.789602	0.469287	0.25	0.375	1
hebe	0.789602	0.31302	0.25	0.375	1
fh	0.789602	0.281655	0.25	0.375	1
La	0.793503	0.645703	0.438	0.625	1
fok	0.805036	0.300155	0.688	0.875	1
Rpb12	0.805358	0.553733	0.312	0.5	1
Nup62	0.805358	0.52776	0.312	0.5	1
snf	0.805358	0.426335	0.312	0.5	1
PH4alphaEFB	0.805358	0.38613	0.312	0.5	1
l(2)gl	0.805358	0.301969	0.312	0.5	1
Sf3b2	0.805358	0.296904	0.312	0.5	1
corto	0.805358	0.277361	0.312	0.5	1
CG4038	0.81087	0.716601	0.375	0.5	1
SerRS	0.81087	0.667388	0.375	0.5	1
CG34200	0.81087	0.638513	0.375	0.5	1
CG33303	0.81087	0.607451	0.375	0.5	1
zip	0.81087	0.59035	0.375	0.5	1
alph	0.81087	0.550523	0.375	0.5	1
Rcd5	0.81087	0.505953	0.375	0.5	1
Cchl	0.81087	0.457511	0.375	0.5	1
NUCB1	0.81087	0.454559	0.375	0.5	1
Nlg3	0.81087	0.454219	0.375	0.5	1
CG5946	0.81087	0.295458	0.375	0.5	1
cdi	0.815286	0.442032	0.375	0.625	1
RhoGAP19D	0.815286	0.417972	0.375	0.625	1
CG9953	0.815286	0.411752	0.375	0.625	1
CG11752	0.821683	0.383927	0.438	0.75	1
GILT3	0.821683	0.268953	0.438	0.75	1
eRF1	0.823957	0.540097	0.5	0.75	1
Trxr-1	0.825715	0.264231	0.5	0.875	1
CaBP1	0.825754	0.288765	0.5	0.875	1
Naa30A	0.826729	0.759497	0.312	0.375	1
Sirt1	0.826729	0.67447	0.312	0.375	1
Spt5	0.826729	0.595779	0.312	0.375	1
CG33156	0.826729	0.594544	0.312	0.375	1
CG43222	0.826729	0.578809	0.312	0.375	1
Ncoa6	0.826729	0.561943	0.312	0.375	1
Der-2	0.826729	0.550629	0.312	0.375	1
cact	0.826729	0.526202	0.312	0.375	1
zld	0.826729	0.486152	0.312	0.375	1
CG42750	0.826729	0.484545	0.312	0.375	1
Dp	0.826729	0.452421	0.312	0.375	1
CG42450	0.826729	0.427882	0.312	0.375	1
CG6610	0.826729	0.406343	0.312	0.375	1
CCT8	0.826729	0.378198	0.312	0.375	1
CG12099	0.826729	0.339859	0.312	0.375	1
eIF3i	0.827153	0.286886	0.5	1	1
fax	0.828218	0.507741	0.625	0.875	1
Appl	0.828218	0.318063	0.688	0.75	1
CG5773	0.829558	0.672524	0.75	0.875	1
CG1124	0.830144	-0.263018	0.812	1	1
CG9248	0.840505	0.34383	0.25	0.25	1
CG5390	0.844357	0.43068	0.438	0.625	1
mRpL42	0.844357	0.398709	0.438	0.625	1
CG15168	0.844357	0.396131	0.438	0.625	1
LamC	0.844357	0.35468	0.438	0.625	1
PDCD-5	0.848846	0.378514	0.25	0.375	1
Sfxn1-3	0.848846	0.362827	0.25	0.375	1
CG31908	0.848846	0.285134	0.25	0.375	1
pr	0.848846	0.281585	0.25	0.375	1
CG6984	0.848846	0.259684	0.25	0.375	1
CG1890	0.860284	0.558149	0.312	0.5	1
fz2	0.860284	0.483756	0.312	0.5	1
CG11885	0.860284	0.387615	0.312	0.5	1
Wdr62	0.860284	0.355338	0.312	0.5	1
CG16903	0.860284	0.347612	0.312	0.5	1
Ttd14	0.860284	0.343103	0.312	0.5	1
Amun	0.860284	0.328143	0.312	0.5	1
Stim	0.860284	0.324283	0.312	0.5	1
Treh	0.860284	0.311723	0.312	0.5	1
CanB2	0.860284	0.304833	0.312	0.5	1
CG13654	0.860284	0.282731	0.312	0.5	1
ste14	0.860284	0.280062	0.312	0.5	1
DopEcR	0.864278	0.691495	0.375	0.5	1
mei-P26	0.864278	0.531454	0.375	0.5	1
CG5708	0.864278	0.454316	0.375	0.5	1
kis	0.864278	0.401078	0.375	0.5	1
Jarid2	0.864278	0.367416	0.375	0.5	1
CG33229	0.864278	0.342457	0.375	0.5	1
klg	0.867476	1.26566	0.375	0.625	1
Srp14	0.867476	0.468458	0.375	0.625	1
CG31360	0.867476	0.415254	0.375	0.625	1
CG12237	0.867476	0.359217	0.375	0.625	1
mRpL46	0.867476	0.339776	0.375	0.625	1
CG5961	0.872104	0.539406	0.438	0.75	1
spidey	0.872104	0.534148	0.438	0.75	1
CG15715	0.872104	0.302878	0.438	0.75	1
CG10470	0.872104	0.276284	0.438	0.75	1
Sxl	0.873749	0.256974	0.5	0.75	1
nrv3	0.876828	0.443165	0.625	0.875	1
Clc	0.876828	0.297718	0.562	1	1
CG42394	0.877797	-0.292721	0.688	1	1
Pfdn6	0.895869	0.56037	0.438	0.625	1
elav	0.895869	0.471572	0.438	0.625	1
Mes4	0.897087	0.273664	0.188	0.25	1
Nadsyn	0.897087	0.263208	0.188	0.25	1
CG7903	0.908957	0.743892	0.25	0.375	1
CG9253	0.908957	0.568812	0.25	0.375	1
beat-Ib	0.908957	0.564891	0.25	0.375	1
kst	0.908957	0.512831	0.25	0.375	1
CG9328	0.908957	0.463961	0.25	0.375	1
ifc	0.908957	0.45307	0.25	0.375	1
Hsp26	0.908957	0.436355	0.25	0.375	1
lncRNA:CR32218	0.908957	0.429852	0.25	0.375	1
asrij	0.908957	0.428285	0.25	0.375	1
CG12594	0.908957	0.410979	0.25	0.375	1
Rab6	0.908957	0.409438	0.25	0.375	1
Sgt	0.908957	0.407457	0.25	0.375	1
Wdr82	0.908957	0.398997	0.25	0.375	1
Roc2	0.908957	0.389987	0.25	0.375	1
CG42542	0.908957	0.385947	0.25	0.375	1
l(3)87Df	0.908957	0.380618	0.25	0.375	1
CSN8	0.908957	0.36571	0.25	0.375	1
Hip14	0.908957	0.359055	0.25	0.375	1
CG9281	0.908957	0.343591	0.25	0.375	1
CG11883	0.908957	0.333029	0.25	0.375	1
betaTub97EF	0.908957	0.312979	0.25	0.375	1
Ssdp	0.908957	0.281823	0.25	0.375	1
LeuRS-m	0.908957	0.274523	0.25	0.375	1
DCTN6-p27	0.908957	0.263129	0.25	0.375	1
hpRNA:CR33940	0.915893	0.495878	0.312	0.5	1
CG42668	0.915893	0.46472	0.312	0.5	1
tacc	0.915893	0.422993	0.312	0.5	1
CG42336	0.915893	0.349481	0.312	0.5	1
GlyP	0.915893	0.343912	0.312	0.5	1
CG7781	0.915893	0.2702	0.312	0.5	1
sni	0.918313	0.50323	0.375	0.5	1
CG3262	0.918313	0.49921	0.375	0.5	1
CG31694	0.918313	0.478569	0.375	0.5	1
CG32278	0.918313	0.344186	0.375	0.5	1
PheRS-m	0.918313	0.271625	0.375	0.5	1
Rbp1-like	0.92025	0.67398	0.375	0.625	1
AIMP1	0.92025	0.623954	0.375	0.625	1
Tim9a	0.92025	0.613186	0.375	0.625	1
EMC8-9	0.92025	0.511437	0.375	0.625	1
CG8209	0.92025	0.445581	0.375	0.625	1
mRpS31	0.92025	0.422962	0.375	0.625	1
Surf4	0.92025	0.396636	0.375	0.625	1
rad	0.923051	0.275847	0.5	0.625	1
CG5021	0.923051	0.273682	0.438	0.75	1
mod	0.923051	0.257559	0.5	0.625	1
ND-20	0.924831	0.358794	0.5	0.875	1
mRpL12	0.924831	0.28588	0.5	0.875	1
Pdha	0.926251	0.339419	0.625	1	1
CG9410	0.941833	0.478388	0.312	0.375	1
CG10465	0.941833	0.465143	0.312	0.375	1
Tom40	0.941833	0.349685	0.312	0.375	1
CG14903	0.941833	0.310453	0.312	0.375	1
CG43324	0.947823	0.467798	0.438	0.625	1
FeCH	0.947823	0.380977	0.438	0.625	1
CG10623	0.949321	0.313981	0.562	0.625	1
ND-B14.5A	0.950255	0.406662	0.562	0.875	1
akirin	0.950255	0.345126	0.562	0.875	1
heph	0.950255	0.276267	0.562	0.875	1
CG45049	0.950795	0.274582	0.688	0.875	1
CG11151	0.950795	0.261023	0.688	0.875	1
salm	0.957521	0.611162	0.125	0.125	1
Lmx1a	0.957521	0.495045	0.125	0.125	1
stau	0.957521	0.436438	0.125	0.125	1
CG3040	0.957521	0.432701	0.125	0.125	1
CG17121	0.957521	0.432003	0.125	0.125	1
CG6937	0.957521	0.430671	0.125	0.125	1
CG33052	0.957521	0.430671	0.125	0.125	1
Hph	0.957521	0.424815	0.125	0.125	1
Nmdar2	0.957521	0.422785	0.125	0.125	1
CG9890	0.957521	0.41785	0.125	0.125	1
CG5767	0.957521	0.416043	0.125	0.125	1
CG9986	0.957521	0.405621	0.125	0.125	1
CG31522	0.957521	0.405559	0.125	0.125	1
pxb	0.957521	0.393726	0.125	0.125	1
CG42540	0.957521	0.392919	0.125	0.125	1
Dl	0.957521	0.392854	0.125	0.125	1
CG5439	0.957521	0.39254	0.125	0.125	1
goe	0.957521	0.39254	0.125	0.125	1
mRpS35	0.957521	0.39051	0.125	0.125	1
CG31676	0.957521	0.39051	0.125	0.125	1
CG14618	0.957521	0.3872	0.125	0.125	1
Rrp6	0.957521	0.3872	0.125	0.125	1
l(2)k09848	0.957521	0.3872	0.125	0.125	1
Rab26	0.957521	0.365901	0.125	0.125	1
mnd	0.957521	0.362874	0.125	0.125	1
MetRS-m	0.957521	0.357884	0.125	0.125	1
fs(2)ltoPP43	0.957521	0.357884	0.125	0.125	1
Golgin84	0.957521	0.345172	0.125	0.125	1
Usp16-45	0.957521	0.345006	0.125	0.125	1
CG8405	0.957521	0.341247	0.125	0.125	1
CG17065	0.957521	0.338975	0.125	0.125	1
lncRNA:CR45566	0.957521	0.338283	0.125	0.125	1
Charon	0.957521	0.336154	0.125	0.125	1
CG13390	0.957521	0.334124	0.125	0.125	1
CG17977	0.957521	0.332857	0.125	0.125	1
CG34353	0.957521	0.331734	0.125	0.125	1
Nup54	0.957521	0.329833	0.125	0.125	1
CG5886	0.957521	0.329833	0.125	0.125	1
Fancm	0.957521	0.328822	0.125	0.125	1
CG3984	0.957521	0.328732	0.125	0.125	1
CG15097	0.957521	0.327276	0.125	0.125	1
Hsp27	0.957521	0.326311	0.125	0.125	1
CG2100	0.957521	0.325878	0.125	0.125	1
Smyd5	0.957521	0.324325	0.125	0.125	1
CG14341	0.957521	0.319579	0.125	0.125	1
beat-IIIb	0.957521	0.310519	0.125	0.125	1
D	0.957521	0.308489	0.125	0.125	1
Shal	0.957521	0.308212	0.125	0.125	1
CG11576	0.957521	0.30711	0.125	0.125	1
Pcl	0.957521	0.305716	0.125	0.125	1
CG1764	0.957521	0.303796	0.125	0.125	1
MME1	0.957521	0.301644	0.125	0.125	1
Alg10	0.957521	0.298158	0.125	0.125	1
CG15744	0.957521	0.297448	0.125	0.125	1
CG11417	0.957521	0.297154	0.125	0.125	1
Drep4	0.957521	0.29254	0.125	0.125	1
beat-Ic	0.957521	0.292437	0.125	0.125	1
pyr	0.957521	0.28526	0.125	0.125	1
CG1024	0.957521	0.28526	0.125	0.125	1
CG13895	0.957521	0.28323	0.125	0.125	1
HPS1	0.957521	0.280518	0.125	0.125	1
CG3961	0.957521	0.272086	0.125	0.125	1
Gas41	0.957521	0.266359	0.125	0.125	1
Sgf29	0.957521	0.26575	0.125	0.125	1
Drp1	0.957521	0.265399	0.125	0.125	1
CG16888	0.957521	0.261451	0.125	0.125	1
CG10038	0.957521	0.259651	0.125	0.125	1
CG9356	0.957521	0.258713	0.125	0.125	1
CG13097	0.957521	0.258713	0.125	0.125	1
CG9300	0.957521	0.258713	0.125	0.125	1
CG8939	0.957521	0.25503	0.125	0.125	1
CG6310	0.957521	0.254171	0.125	0.125	1
SK	0.96561	0.788145	0.188	0.25	1
CG31918	0.96561	0.580202	0.188	0.25	1
CG13921	0.96561	0.553883	0.188	0.25	1
128up	0.96561	0.535574	0.188	0.25	1
CG31688	0.96561	0.528588	0.188	0.25	1
RfC3	0.96561	0.49528	0.188	0.25	1
rdgBbeta	0.96561	0.468918	0.188	0.25	1
lncRNA:CR43958	0.96561	0.449395	0.188	0.25	1
Gs1	0.96561	0.437951	0.188	0.25	1
Ccm3	0.96561	0.435791	0.188	0.25	1
CG10802	0.96561	0.434172	0.188	0.25	1
PIG-B	0.96561	0.432316	0.188	0.25	1
nonA	0.96561	0.412178	0.188	0.25	1
CG14881	0.96561	0.404754	0.188	0.25	1
tra2	0.96561	0.392589	0.188	0.25	1
CG1542	0.96561	0.386063	0.188	0.25	1
ecd	0.96561	0.385675	0.188	0.25	1
pit	0.96561	0.375039	0.188	0.25	1
CG42322	0.96561	0.365358	0.188	0.25	1
eEF1alpha2	0.96561	0.356134	0.188	0.25	1
brp	0.96561	0.355647	0.188	0.25	1
MBD-like	0.96561	0.353946	0.188	0.25	1
CG14073	0.96561	0.344233	0.188	0.25	1
CG14229	0.96561	0.331916	0.188	0.25	1
ctrip	0.96561	0.325224	0.188	0.25	1
CG17141	0.96561	0.324738	0.188	0.25	1
CG6404	0.96561	0.323807	0.188	0.25	1
Dd	0.96561	0.315203	0.188	0.25	1
Tmem18	0.96561	0.311061	0.188	0.25	1
CG11555	0.96561	0.310749	0.188	0.25	1
Gos28	0.96561	0.310143	0.188	0.25	1
Atf3	0.96561	0.303203	0.188	0.25	1
rho-7	0.96561	0.302722	0.188	0.25	1
l(3)neo43	0.96561	0.299572	0.188	0.25	1
l(3)05822	0.96561	0.292807	0.188	0.25	1
CG14414	0.96561	0.263328	0.188	0.25	1
CG7272	0.96561	0.251455	0.188	0.25	1
dlg1	0.96561	0.250069	0.188	0.25	1
SmE	0.972729	0.40735	0.375	0.5	1
sdt	0.972729	0.256723	0.375	0.5	1
CG31221	0.973377	0.675537	0.375	0.625	1
Dic1	0.973377	0.674985	0.375	0.625	1
CG44774	0.973377	0.653518	0.375	0.625	1
sina	0.973377	0.600415	0.375	0.625	1
wrd	0.973377	0.37433	0.375	0.625	1
CG6878	0.973377	0.368499	0.375	0.625	1
sxc	0.973377	0.361517	0.375	0.625	1
Vps24	0.973377	0.356842	0.375	0.625	1
mRpL24	0.974309	0.439582	0.438	0.75	1
Eip75B	0.974315	0.550764	0.438	0.75	1
miple1	0.974648	0.355166	0.5	0.75	1
CG5885	0.974648	0.299308	0.5	0.75	1
l(2)37Cc	0.975271	0.261027	0.562	1	1
REPTOR-BP	0.975386	0.295764	0.625	1	1
shep	0.975552	0.330905	0.812	1	1
CG8034	1	0.483012	0.438	0.625	1
eIF6	1	0.471603	0.312	0.375	1
Sf3b6	1	0.423494	0.438	0.625	1
AnxB9	1	0.328674	0.625	1	1
CG7154	1	0.308249	0.312	0.375	1
Wdfy2	1	0.305473	0.375	0.5	1
Sod2	1	0.296089	0.562	0.875	1
RpS15Ab	1	0.267469	0.438	0.625	1
Pits	1	0.262808	0.5	0.75	1
His2Av	1	0.250874	0.562	0.875	1

## Sheet: GABAergic neurons
Columna1	p_val	avg_logFC	pct.1	pct.2	p_val_adj
Fkbp12	8.32208e-52	0.675909	0.988	0.995	1.17042e-47
Hsp26	2.07846e-49	1.00124	0.842	0.251	2.92315e-45
hoip	1.68876e-48	0.873936	0.83	0.265	2.37507e-44
Ilp5	7.63074e-47	1.22106	0.69	0.169	1.07319e-42
awd	2.29366e-44	0.785893	0.994	0.962	3.2258e-40
Hsp83	1.01229e-42	1.09109	0.936	0.69	1.42368e-38
Hsp27	1.14739e-40	0.795361	0.702	0.148	1.61369e-36
Non1	2.41317e-38	-0.779018	0.737	0.918	3.39388e-34
REPTOR-BP	2.46881e-37	-0.791626	0.684	0.923	3.47214e-33
betaTub56D	9.52986e-37	0.619166	0.994	0.991	1.34028e-32
tsr	9.62455e-37	0.538673	0.988	0.986	1.3536e-32
smt3	3.60372e-36	0.587209	0.988	0.965	5.06828e-32
fabp	1.28991e-34	0.805544	0.924	0.784	1.81412e-30
Nph	7.29956e-34	0.704831	0.842	0.441	1.02661e-29
Hsc70-4	7.49078e-34	0.464421	0.977	0.969	1.0535e-29
lncRNA:CR42862	2.50959e-33	-0.817574	0.754	0.925	3.52949e-29
Nlp	5.75501e-33	0.67632	0.947	0.782	8.09384e-29
Fer2LCH	2.0208e-32	-0.558222	0.924	0.988	2.84206e-28
Hsp23	8.4549e-32	0.767785	0.889	0.437	1.1891e-27
Ilp2	7.21558e-31	0.986193	0.819	0.617	1.0148e-26
Cyp1	1.92115e-30	0.394913	0.988	0.991	2.70191e-26
Pdcd4	1.74061e-29	-0.598401	0.924	0.979	2.44799e-25
Fer1HCH	1.99006e-29	-0.512736	0.977	0.984	2.79882e-25
eEF1alpha1	6.93475e-29	-0.35961	0.988	0.998	9.75303e-25
CG43222	4.53196e-27	0.567124	0.942	0.815	6.37375e-23
Ldh	6.30324e-27	0.555504	1	0.969	8.86487e-23
unk	4.0283e-26	-0.679681	0.673	0.885	5.6654e-22
lncRNA:CR42491	8.37457e-26	0.416048	0.398	0.054	1.1778e-21
CG42566	2.64956e-25	-0.66581	0.187	0.62	3.72634e-21
eEF2	3.61541e-25	-0.478353	0.924	0.979	5.08471e-21
CG2082	5.17826e-25	-0.859582	0.263	0.707	7.2827e-21
RNASEK	7.9024e-25	0.417399	0.994	0.981	1.11139e-20
COX7A	1.03675e-24	0.444151	0.982	0.972	1.45809e-20
CG5059	3.02228e-24	-0.715861	0.339	0.711	4.25053e-20
SmF	5.43875e-24	0.525416	0.713	0.31	7.64906e-20
Fkbp39	6.76778e-24	0.550903	0.819	0.441	9.5182e-20
LTV1	7.06333e-24	-0.621915	0.485	0.793	9.93386e-20
CNBP	2.45087e-23	0.486305	0.942	0.878	3.44691e-19
SmD3	3.00897e-23	0.561155	0.754	0.378	4.23182e-19
P32	1.06168e-22	0.539459	0.795	0.441	1.49315e-18
Hr4	1.06925e-22	0.656385	0.731	0.3	1.50379e-18
alphaTub84B	1.76673e-22	0.367431	1	0.995	2.48473e-18
mt:lrRNA	2.47134e-22	-0.444251	1	1	3.47569e-18
Nplp2	1.50656e-21	-0.555462	0.561	0.862	2.11883e-17
CG8157	1.56665e-21	-0.578944	0.287	0.723	2.20333e-17
Jafrac1	6.51782e-21	0.488638	0.936	0.786	9.16666e-17
eIF4A	7.34902e-21	-0.32149	0.988	1	1.03357e-16
COX6B	3.10991e-20	0.387151	0.994	0.991	4.37377e-16
His3.3B	6.11867e-20	-0.501708	0.942	0.988	8.6053e-16
NHP2	9.09487e-20	0.461796	0.661	0.286	1.2791e-15
CG7630	9.7433e-20	0.418455	0.988	0.981	1.3703e-15
Hsp67Bc	1.91287e-19	0.661175	0.883	0.636	2.69025e-15
ATPsynE	2.15228e-19	0.422209	0.965	0.955	3.02697e-15
ATPsynO	2.33288e-19	0.459368	0.959	0.92	3.28096e-15
Gapdh1	2.3584e-19	0.336447	1	1	3.31685e-15
CG6610	2.83684e-19	0.391265	0.556	0.181	3.98973e-15
Sod1	3.59493e-19	0.39476	0.947	0.864	5.05591e-15
sun	4.56006e-19	0.431577	0.953	0.92	6.41327e-15
COX8	4.90346e-19	0.378625	0.971	0.977	6.89623e-15
RpL38	6.24497e-19	-0.306548	0.988	1	8.78293e-15
eIF3l	6.93597e-19	-0.52044	0.596	0.8	9.75475e-15
Uhg4	1.7546e-18	0.447285	0.731	0.34	2.46766e-14
CG2862	2.38303e-18	0.496477	0.819	0.589	3.35149e-14
Hsp67Ba	2.5085e-18	0.310803	0.287	0.04	3.52795e-14
GstZ2	5.25976e-18	0.59795	0.854	0.65	7.39733e-14
eEF1delta	5.26857e-18	0.456172	0.789	0.439	7.40972e-14
Drat	1.12788e-17	-0.350227	0.988	0.998	1.58625e-13
CG16985	1.32217e-17	0.330826	0.45	0.134	1.8595e-13
mtSSB	2.13005e-17	0.400204	0.579	0.223	2.9957e-13
chic	2.90827e-17	0.331803	0.971	0.977	4.09019e-13
RpL24-like	3.78465e-17	-0.429871	0.865	0.948	5.32273e-13
janA	3.90682e-17	0.398811	0.544	0.192	5.49455e-13
Ran	4.66498e-17	0.457729	0.877	0.69	6.56083e-13
CG44325	5.50274e-17	-0.523288	0.269	0.587	7.73906e-13
UQCR-Q	5.85503e-17	0.377261	0.965	0.951	8.23451e-13
PCNA	6.65794e-17	0.341714	0.462	0.141	9.36373e-13
MtnA	8.84878e-17	-0.488447	0.398	0.676	1.24449e-12
pix	1.03882e-16	-0.442202	0.673	0.847	1.461e-12
Pcd	1.298e-16	0.491863	0.76	0.423	1.8255e-12
CG9336	1.33375e-16	-0.47553	0.14	0.481	1.87579e-12
ATPsynCF6	1.39208e-16	0.362424	0.947	0.962	1.95782e-12
ATPsynC	2.26563e-16	0.267852	1	0.998	3.18638e-12
eIF3m	4.32495e-16	-0.405824	0.819	0.883	6.0826e-12
ATPsynF	6.65441e-16	0.316198	0.982	0.991	9.35876e-12
pAbp	1.18911e-15	-0.279641	0.994	1	1.67237e-11
CG11267	1.21297e-15	0.487727	0.924	0.878	1.70592e-11
CG9821	1.32845e-15	-0.301055	1	1	1.86833e-11
Act42A	3.39504e-15	0.391017	0.942	0.862	4.77478e-11
Mpcp2	4.34903e-15	-0.358808	0.93	0.972	6.11648e-11
SNRPG	4.61824e-15	0.416822	0.854	0.655	6.49509e-11
ox	4.72954e-15	0.419936	0.947	0.925	6.65163e-11
p23	5.16911e-15	0.379334	0.906	0.847	7.26983e-11
Ntf-2	6.41535e-15	0.430738	0.865	0.613	9.02255e-11
ATPsynD	7.54195e-15	0.374269	0.947	0.974	1.0607e-10
His3.3A	9.51355e-15	0.331395	0.936	0.901	1.33799e-10
InR	1.02951e-14	-0.507048	0.772	0.918	1.4479e-10
cype	1.08191e-14	0.266196	0.994	0.998	1.5216e-10
kud	1.45869e-14	0.398742	0.749	0.469	2.0515e-10
Syt4	1.4918e-14	-0.387663	0.901	0.944	2.09807e-10
SmB	1.58011e-14	0.435462	0.836	0.613	2.22227e-10
levy	1.79598e-14	0.308485	0.977	0.981	2.52587e-10
rin	1.90098e-14	0.376949	0.924	0.85	2.67354e-10
CG1572	2.74843e-14	-0.453548	0.146	0.469	3.86539e-10
fax	2.78374e-14	0.283184	0.994	1	3.91505e-10
SmE	2.90105e-14	0.426312	0.789	0.542	4.08004e-10
CG10638	2.97016e-14	0.283406	0.45	0.146	4.17723e-10
Tom7	5.04826e-14	0.335809	0.971	0.918	7.09987e-10
Tsp42Ee	5.41712e-14	-0.412744	0.836	0.894	7.61863e-10
Neb-cGP	5.49099e-14	0.324798	0.947	0.977	7.72252e-10
COX5A	8.05507e-14	0.313334	0.959	0.96	1.13287e-09
Hel25E	8.44648e-14	0.35415	0.871	0.606	1.18791e-09
dUTPase	1.30312e-13	0.416368	0.643	0.336	1.8327e-09
Tim8	1.54671e-13	0.38401	0.854	0.615	2.17529e-09
Non2	2.12958e-13	0.353441	0.883	0.657	2.99504e-09
Tpi	3.11914e-13	0.258874	0.988	0.995	4.38675e-09
REPTOR	3.49983e-13	-0.441059	0.497	0.742	4.92217e-09
dod	4.03849e-13	0.369007	0.778	0.472	5.67973e-09
Sirup	5.38255e-13	-0.502256	0.439	0.622	7.57001e-09
CG3662	5.54448e-13	-0.325226	0.918	0.958	7.79776e-09
Uhg7	7.56413e-13	-0.378989	0.614	0.803	1.06382e-08
Set	7.70109e-13	0.365063	0.813	0.528	1.08308e-08
CG9344	7.88692e-13	0.391117	0.743	0.498	1.10922e-08
SmD2	1.72559e-12	0.365209	0.836	0.657	2.42687e-08
CG9691	1.74032e-12	-0.38452	0.211	0.493	2.44759e-08
Glut4EF	1.75757e-12	-0.363988	0.865	0.946	2.47184e-08
CG10077	1.94999e-12	-0.282089	0.988	0.988	2.74246e-08
jhamt	2.98225e-12	-0.37265	0.058	0.319	4.19424e-08
CCT3	4.03281e-12	0.355826	0.696	0.38	5.67175e-08
UQCR-14	4.09858e-12	0.300685	0.93	0.958	5.76425e-08
CCT5	4.73817e-12	0.326431	0.561	0.261	6.66376e-08
Glo1	4.90623e-12	0.277799	0.509	0.211	6.90012e-08
CG43066	5.10519e-12	-0.339989	0.807	0.866	7.17993e-08
Ip259	6.93137e-12	-0.408731	0.784	0.859	9.74827e-08
Lk6	8.9669e-12	-0.355771	0.883	0.941	1.2611e-07
Nop56	9.24325e-12	0.349789	0.725	0.39	1.29997e-07
CCT1	1.06219e-11	0.289664	0.55	0.256	1.49386e-07
nop5	1.18323e-11	0.33019	0.567	0.268	1.6641e-07
Thor	1.29374e-11	-0.578819	0.415	0.638	1.81952e-07
CG32409	1.39215e-11	0.282317	0.38	0.129	1.95793e-07
CG9705	1.77143e-11	0.371039	0.731	0.479	2.49134e-07
Nckx30C	1.86237e-11	-0.41938	0.936	0.944	2.61924e-07
TMS1	2.75649e-11	-0.369323	0.749	0.817	3.87673e-07
COX5B	2.77348e-11	0.275664	0.965	0.969	3.90062e-07
PDCD-5	4.83939e-11	0.343344	0.673	0.376	6.80612e-07
mt:ND2	6.39922e-11	-0.476373	0.76	0.85	8.99986e-07
roh	6.76271e-11	0.294847	0.965	0.974	9.51108e-07
Pfdn6	7.01486e-11	0.3412	0.801	0.594	9.8657e-07
CG7006	1.12969e-10	0.250304	0.462	0.197	1.5888e-06
ND-15	1.32042e-10	0.32565	0.883	0.829	1.85704e-06
CG8498	1.40832e-10	0.349674	0.819	0.629	1.98067e-06
SNF4Agamma	1.43041e-10	-0.383206	0.602	0.735	2.01173e-06
CG8860	1.94985e-10	0.30665	0.86	0.69	2.74227e-06
Obp99a	2.52484e-10	0.38796	0.895	0.737	3.55093e-06
Vha14-1	3.24435e-10	0.263933	0.947	0.918	4.56285e-06
COX7C	4.13182e-10	0.301479	0.971	0.972	5.81099e-06
CG12384	4.27046e-10	-0.372571	0.684	0.793	6.00597e-06
CG14767	4.49165e-10	-0.264659	0.801	0.901	6.31706e-06
SmD1	4.88828e-10	0.325492	0.637	0.369	6.87488e-06
CG14312	5.01655e-10	0.286273	0.936	0.866	7.05528e-06
Ric	5.08785e-10	-0.308065	0.906	0.932	7.15556e-06
Sc2	5.63569e-10	0.357574	0.667	0.385	7.92603e-06
ATPsynG	5.82426e-10	0.255941	0.982	0.981	8.19123e-06
RPA3	7.00974e-10	0.274114	0.509	0.23	9.8585e-06
Sem1	8.89119e-10	0.300457	0.813	0.655	1.25046e-05
futsch	1.01446e-09	0.297851	0.988	0.948	1.42674e-05
CG7083	1.2207e-09	-0.271996	0.082	0.317	1.71679e-05
Prosalpha7	1.34449e-09	0.332487	0.737	0.491	1.89089e-05
La	1.3858e-09	0.316852	0.637	0.371	1.94899e-05
Pomp	1.40333e-09	0.312956	0.772	0.594	1.97364e-05
CaMKII	1.40465e-09	0.258087	0.965	0.937	1.9755e-05
CG7637	1.44105e-09	0.328367	0.678	0.413	2.02669e-05
Su(var)205	1.47843e-09	0.317671	0.901	0.754	2.07926e-05
CG11000	1.60179e-09	0.384681	0.965	0.857	2.25275e-05
CG42258	1.77022e-09	-0.392696	0.62	0.744	2.48964e-05
CG1648	2.04569e-09	-0.343935	0.193	0.439	2.87706e-05
Ms	2.05623e-09	0.31387	0.83	0.606	2.89188e-05
Dak1	2.16031e-09	0.290761	0.942	0.897	3.03827e-05
CG17734	2.28064e-09	0.352336	0.795	0.601	3.20749e-05
Sxl	2.81524e-09	-0.577463	0.877	0.932	3.95935e-05
CG14265	3.34953e-09	-0.25681	0.012	0.2	4.71078e-05
rudhira	3.40077e-09	-0.330102	0.807	0.85	4.78284e-05
Hsp60A	3.40974e-09	0.315747	0.83	0.754	4.79546e-05
Rab7	3.46681e-09	-0.335212	0.62	0.737	4.87572e-05
hfp	3.60464e-09	-0.329173	0.784	0.857	5.06956e-05
CG5676	4.04873e-09	0.283236	0.889	0.819	5.69414e-05
Sec61gamma	4.18507e-09	0.288515	0.865	0.768	5.88588e-05
alphaTub84D	4.53847e-09	0.28573	0.83	0.685	6.3829e-05
eEF1gamma	5.65772e-09	-0.257302	0.942	0.948	7.95702e-05
Gad1	5.72203e-09	-0.269615	0.942	0.906	8.04746e-05
Uhg5	5.81017e-09	0.257128	0.614	0.324	8.17142e-05
CG5065	6.09531e-09	0.266467	0.924	0.817	8.57244e-05
SkpA	6.3342e-09	0.251561	0.953	0.894	8.90842e-05
TM4SF	6.76813e-09	-0.253131	0.953	0.972	9.5187e-05
CCT7	7.58675e-09	0.258206	0.509	0.263	0.0001067
COX4	8.02377e-09	0.259006	0.953	0.974	0.000112846
Pen	8.07454e-09	0.251258	0.345	0.131	0.00011356
eIF3b	1.03996e-08	-0.291234	0.708	0.786	0.000146259
Nop60B	1.31384e-08	0.341499	0.556	0.326	0.000184778
stj	1.33167e-08	-0.310283	0.45	0.646	0.000187286
eIF2beta	1.33935e-08	0.286326	0.842	0.662	0.000188366
Ssb-c31a	1.45642e-08	0.316503	0.743	0.542	0.000204831
Trx-2	1.47541e-08	0.256605	0.936	0.906	0.000207502
Rpb11	1.63919e-08	0.28205	0.678	0.427	0.000230535
jef	1.90325e-08	-0.313053	0.713	0.803	0.000267672
CG6084	2.31902e-08	0.326981	0.444	0.216	0.000326147
Alg-2	2.67028e-08	0.306534	0.772	0.577	0.000375549
Scr	2.92118e-08	-0.603071	0.088	0.298	0.000410835
Obp44a	3.001e-08	0.282775	0.901	0.96	0.000422061
eIF3d1	3.00992e-08	-0.314182	0.637	0.707	0.000423316
Hsc70Cb	3.05378e-08	0.269953	0.719	0.446	0.000429484
ringer	3.54718e-08	-0.262637	0.924	0.948	0.000498876
Tim9a	3.72056e-08	0.304468	0.731	0.479	0.000523259
CG32772	5.06574e-08	-0.314822	0.427	0.615	0.000712446
AGO1	5.68886e-08	-0.275769	0.889	0.951	0.000800082
Phf5a	6.04468e-08	0.341218	0.696	0.481	0.000850123
pre-rRNA:CR45845	7.48554e-08	-0.434199	0.462	0.631	0.00105277
CG13868	7.9834e-08	-0.315648	0.62	0.746	0.00112278
RpII18	8.07813e-08	0.282054	0.754	0.519	0.00113611
lncRNA:CR40469	1.02538e-07	-0.398958	0.304	0.535	0.00144209
CG15891	1.04924e-07	-0.339098	0.409	0.573	0.00147565
Wbp2	1.19345e-07	-0.291479	0.269	0.453	0.00167846
mRpS14	1.26181e-07	0.263124	0.708	0.472	0.00177461
CG13920	1.66439e-07	0.264662	0.947	0.871	0.0023408
Cp1	1.67225e-07	-0.314252	0.708	0.763	0.00235186
mt:ND3	1.93855e-07	-0.362202	0.83	0.873	0.00272637
Atg18a	1.94093e-07	-0.288891	0.187	0.392	0.00272972
CG42394	2.06786e-07	-0.281957	0.889	0.92	0.00290824
lncRNA:CR34335	2.08517e-07	-0.290992	0.988	0.991	0.00293258
eIF3k	2.17544e-07	-0.280661	0.848	0.897	0.00305954
CG9922	2.62688e-07	0.280722	0.684	0.469	0.00369444
Pfdn5	3.03913e-07	0.272554	0.801	0.65	0.00427423
Alk	3.25368e-07	-0.252425	0.947	0.955	0.00457598
CG4364	3.3905e-07	-0.357136	0.474	0.592	0.00476839
CG8818	3.48405e-07	-0.260366	0.614	0.749	0.00489996
cl	3.67499e-07	0.252781	0.766	0.594	0.0051685
CG44242	3.69391e-07	0.282182	0.836	0.744	0.00519511
Prosbeta4	3.98382e-07	0.284543	0.749	0.552	0.00560284
AdSS	4.12934e-07	-0.272512	0.655	0.768	0.0058075
mRpL52	4.78091e-07	0.269696	0.673	0.453	0.00672387
CG32486	4.97987e-07	-0.394657	0.357	0.495	0.0070037
mRpL12	5.52404e-07	0.278883	0.772	0.531	0.00776901
tsu	5.62073e-07	0.280356	0.743	0.57	0.007905
lncRNA:CR43283	5.64292e-07	0.257286	0.614	0.408	0.00793621
CG9338	6.53955e-07	-0.263243	0.094	0.268	0.00919722
Nedd8	7.13335e-07	0.252931	0.696	0.495	0.0100324
Liprin-gamma	7.13689e-07	-0.252223	0.936	0.977	0.0100373
PPP4R2r	7.48102e-07	0.258018	0.637	0.387	0.0105213
Dh31	8.23706e-07	0.454233	0.468	0.263	0.0115846
eIF3c	9.19669e-07	-0.297092	0.509	0.634	0.0129342
Mnn1	9.96042e-07	-0.335494	0.52	0.643	0.0140083
Pdk1	1.03918e-06	-0.267094	0.602	0.721	0.0146151
TyrRS	1.09197e-06	-0.27414	0.363	0.505	0.0153575
uex	1.23032e-06	0.265849	0.889	0.723	0.0173032
CanB	1.24435e-06	0.316648	0.953	0.918	0.0175005
IscU	1.53142e-06	-0.281385	0.743	0.836	0.0215378
Fie	1.70167e-06	-0.268257	0.485	0.62	0.0239323
Lamp1	1.74574e-06	-0.262471	0.754	0.805	0.0245521
GstD1	1.7829e-06	0.28474	0.596	0.397	0.0250748
CG34132	1.79554e-06	0.304701	0.784	0.695	0.0252525
dpr8	1.91202e-06	0.406348	0.795	0.622	0.0268907
CG6878	1.91481e-06	0.304401	0.766	0.594	0.0269299
Sf3b6	1.96655e-06	0.27585	0.813	0.573	0.0276576
CG32017	2.00869e-06	0.313254	0.953	0.951	0.0282502
CG12213	2.27944e-06	-0.28323	0.322	0.498	0.0320581
D	2.48507e-06	0.429498	0.298	0.131	0.03495
hth	2.73672e-06	-0.423519	0.871	0.941	0.0384893
alc	2.94145e-06	-0.287314	0.608	0.697	0.0413685
Prosbeta2	2.98682e-06	0.252177	0.772	0.563	0.0420067
Poxn	3.14584e-06	0.47142	0.187	0.061	0.044243
Sytbeta	3.32822e-06	0.354083	0.673	0.458	0.0468082
qkr58E-3	3.80995e-06	-0.284793	0.708	0.805	0.0535831
galectin	4.11392e-06	-0.280725	0.503	0.608	0.0578582
Prosalpha3	4.29978e-06	0.251694	0.667	0.481	0.0604721
shrb	4.77273e-06	-0.265592	0.579	0.66	0.0671237
hig	4.81116e-06	-0.361828	0.327	0.509	0.0676641
CG1640	5.29212e-06	-0.272496	0.848	0.876	0.0744284
CG40472	7.48627e-06	0.279763	0.351	0.19	0.105287
mura	7.81708e-06	-0.253746	0.673	0.754	0.109939
Trxr-1	8.44049e-06	0.250723	0.673	0.451	0.118707
CG8369	8.44698e-06	-0.27605	0.474	0.603	0.118798
eIF3a	9.94989e-06	-0.288455	0.538	0.62	0.139935
bma	1.07623e-05	0.408276	0.398	0.218	0.151362
ND-51	1.19872e-05	-0.250578	0.766	0.805	0.168587
heph	1.36331e-05	0.678008	0.789	0.624	0.191736
tna	1.9177e-05	-0.332162	0.871	0.946	0.269706
Reph	2.27458e-05	-0.27119	0.643	0.709	0.319897
CG32700	2.62039e-05	0.297883	0.854	0.7	0.368532
Tomosyn	3.72908e-05	-0.25202	0.801	0.819	0.524458
Cow	4.72927e-05	-0.28429	0.789	0.843	0.665124
nrm	4.86092e-05	0.256281	0.69	0.5	0.68364
SoxN	5.00135e-05	0.370461	0.52	0.35	0.70339
fok	5.98177e-05	-0.299031	0.731	0.779	0.841277
Uev1A	6.27046e-05	0.250322	0.83	0.692	0.881877
CG43085	6.55449e-05	-0.267154	0.368	0.507	0.921823
Antp	9.74288e-05	-0.911837	0.053	0.169	1
flw	9.83489e-05	0.26032	0.93	0.798	1
noc	0.000106692	-0.377969	0.374	0.491	1
LpR1	0.000109649	-0.38415	0.38	0.505	1
elB	0.00013226	-0.327184	0.433	0.566	1
msi	0.000134155	-0.298871	0.971	0.953	1
CG43736	0.000158937	-0.253757	0.69	0.732	1
Oatp74D	0.000186612	-0.28604	0.205	0.336	1
Sox21b	0.000202516	0.296261	0.199	0.089	1
beat-Ic	0.000215268	0.368085	0.713	0.577	1
RapGAP1	0.000350601	0.498474	0.632	0.486	1
fz2	0.000480558	0.262292	0.982	0.965	1
CG14186	0.000493428	-0.384416	0.363	0.465	1
toy	0.000523071	0.260797	0.497	0.34	1
robo3	0.000536344	-0.266904	0.251	0.362	1
beat-IIa	0.000851133	-0.345826	0.444	0.556	1
CG14853	0.000946274	-0.258142	0.339	0.434	1
Sidpn	0.00199467	-0.263177	0.404	0.512	1
scyl	0.00255588	-0.401925	0.813	0.826	1
Ten-m	0.00270588	0.258107	0.667	0.493	1
lncRNA:noe	0.00278329	0.310538	0.404	0.279	1
beat-Ib	0.00312787	0.314476	0.591	0.488	1
CG9016	0.00335833	0.351986	0.146	0.07	1
dpr20	0.0112786	-0.271858	0.228	0.308	1
Fer1	0.0249211	0.281311	0.234	0.157	1
Fas3	0.0272343	0.308636	0.368	0.279	1
Bx	0.0335865	-0.403341	0.427	0.465	1
VGlut	0.0436606	-0.342754	0.737	0.585	1
SPR	0.0491854	-0.368021	0.439	0.486	1
CG42541	0.0536014	0.255116	0.784	0.643	1
salr	0.063729	-0.315808	0.251	0.308	1
Octalpha2R	0.0792206	0.320892	0.643	0.573	1
sr	0.0930525	-0.319969	0.322	0.354	1
CG1402	0.154884	-0.490607	0.105	0.143	1
CG8861	0.298343	-0.260091	0.526	0.533	1
Proc	0.305577	-0.469578	0.31	0.333	1
disco-r	0.494912	-0.270047	0.14	0.155	1
CCAP-R	0.505199	-0.26655	0.287	0.286	1
pros	0.867248	-0.538367	0.187	0.169	1

## Sheet: Glial cells
Columna1	p_val	avg_logFC	pct.1	pct.2	p_val_adj
CG6770	6.83079e-40	-1.06306	0.622	0.959	9.60682e-36
CG5059	1.15822e-35	-0.850194	0.248	0.759	1.62893e-31
CG42566	1.27381e-34	-0.7758	0.174	0.655	1.79149e-30
CG1545	7.85257e-33	-1.04729	0.561	0.918	1.10439e-28
Hsp83	5.66312e-32	1.41084	0.735	0.477	7.96461e-28
Sirup	4.93517e-31	-0.754921	0.53	0.932	6.94082e-27
Hsp26	9.21871e-31	1.10718	0.53	0.126	1.29652e-26
Hsc70-4	1.10886e-30	0.763362	0.883	0.915	1.5595e-26
alphaTub84B	1.64771e-30	0.604876	0.978	0.984	2.31734e-26
tsr	5.54776e-29	0.618614	0.926	0.956	7.80237e-25
betaTub56D	1.07175e-27	0.590304	0.97	0.956	1.50731e-23
REPTOR-BP	3.27957e-24	-0.584783	0.491	0.819	4.61238e-20
CG8157	6.20861e-23	-0.348229	0.283	0.729	8.7318e-19
Prx2540-1	3.78163e-22	-1.04894	0.1	0.496	5.31848e-18
Lip4	8.03097e-22	-0.784717	0.43	0.803	1.12948e-17
Cyp6a17	9.6531e-22	-0.632656	0.313	0.688	1.35761e-17
lncRNA:CR42491	1.15637e-21	0.548174	0.296	0.025	1.62632e-17
Prx2540-2	3.14268e-21	-1.44116	0.091	0.455	4.41986e-17
pdgy	8.18582e-21	-0.710192	0.261	0.608	1.15125e-16
NPF	2.94759e-20	0.562417	0.343	0.052	4.14549e-16
RpL41	4.96312e-20	-0.322111	0.991	1	6.98013e-16
Lk6	5.96513e-20	-0.478183	0.504	0.844	8.38936e-16
CG32521	1.2306e-19	-0.590427	0.461	0.83	1.73072e-15
smt3	1.55765e-19	0.594953	0.852	0.86	2.19069e-15
Idgf6	2.03569e-19	-0.852737	0.422	0.762	2.863e-15
ScsbetaA	8.18512e-19	-0.448416	0.483	0.836	1.15115e-14
Hsp68	1.73328e-18	0.489275	0.248	0.019	2.43769e-14
CG6767	2.7782e-18	-0.587762	0.609	0.915	3.90726e-14
CG13868	2.9785e-18	-0.754938	0.274	0.616	4.18897e-14
Desat1	5.37274e-18	-0.511002	0.643	0.932	7.55623e-14
jhamt	1.40616e-17	-0.39712	0.07	0.381	1.97762e-13
CG12262	1.4874e-17	-0.527581	0.317	0.647	2.09188e-13
CG15098	4.33238e-17	-0.400402	0.548	0.849	6.09306e-13
NHP2	1.11153e-16	0.769261	0.526	0.263	1.56325e-12
MtnA	1.22773e-16	-0.94215	0.735	0.953	1.72668e-12
Nplp2	1.54145e-16	-0.339389	0.5	0.868	2.1679e-12
DOR	1.71632e-16	-0.522836	0.222	0.545	2.41383e-12
hoip	2.43424e-16	1.02566	0.609	0.455	3.42351e-12
Gel	3.59254e-16	-0.531294	0.326	0.668	5.05255e-12
CG1572	3.88237e-16	-0.339102	0.187	0.54	5.46016e-12
Fkbp12	1.18103e-15	0.365395	0.957	0.989	1.66101e-11
Irc	1.23814e-15	-0.767578	0.283	0.603	1.74132e-11
Ilp5	1.39104e-15	1.12498	0.443	0.211	1.95635e-11
lncRNA:CR34335	1.43559e-15	-0.425089	1	0.997	2.01901e-11
CG6115	2.17281e-15	-0.351773	0.496	0.789	3.05584e-11
His3.3B	2.64591e-15	-0.379899	0.465	0.764	3.72121e-11
CG1648	2.72836e-15	-0.528957	0.496	0.792	3.83717e-11
Uhg7	2.75527e-15	-0.368808	0.53	0.833	3.87501e-11
shrb	3.6656e-15	-0.368478	0.348	0.655	5.1553e-11
CG14265	3.88009e-15	-0.348997	0.017	0.266	5.45696e-11
Idgf3	4.07649e-15	-0.436188	0.439	0.767	5.73317e-11
Calr	4.67155e-15	0.572102	0.783	0.833	6.57007e-11
CG5895	4.77343e-15	-0.593623	0.348	0.688	6.71335e-11
Hsp23	5.10781e-15	0.713767	0.517	0.263	7.18362e-11
Hsp27	5.23175e-15	0.513317	0.313	0.071	7.35793e-11
Mpcp2	6.51888e-15	-0.347019	0.752	0.953	9.16816e-11
GLaz	6.97462e-15	-0.68258	0.217	0.518	9.80911e-11
Fer2LCH	7.15696e-15	-0.363623	0.822	0.992	1.00655e-10
Nph	1.1545e-14	0.748567	0.709	0.644	1.62369e-10
Cyp28a5	1.18755e-14	-0.549771	0.439	0.753	1.67018e-10
CG43085	1.31741e-14	-0.77961	0.63	0.879	1.8528e-10
CG5758	2.0194e-14	-0.512621	0.5	0.784	2.84008e-10
LTV1	2.43269e-14	-0.348157	0.33	0.627	3.42133e-10
elm	2.697e-14	-0.317908	0.339	0.636	3.79306e-10
mt:ND3	3.22702e-14	-0.441739	0.617	0.923	4.53848e-10
CG11267	3.84392e-14	0.51591	0.796	0.879	5.40609e-10
CG5044	4.55636e-14	-0.358235	0.291	0.6	6.40806e-10
CG7888	4.83419e-14	-0.652392	0.622	0.863	6.79881e-10
nrv2	5.18175e-14	-0.47369	0.878	0.962	7.28761e-10
RpL29	6.99404e-14	-0.251234	0.978	1	9.83642e-10
Cyp6a9	7.17474e-14	-0.41113	0.078	0.34	1.00906e-09
Rab5	1.07548e-13	-0.299841	0.387	0.682	1.51256e-09
CG8369	1.21232e-13	-0.709352	0.726	0.929	1.70501e-09
Fer1HCH	1.51199e-13	-0.444895	0.835	0.992	2.12647e-09
CG12768	2.54087e-13	-0.396228	0.191	0.452	3.57349e-09
alc	2.79682e-13	-0.354071	0.357	0.638	3.93345e-09
Cyt-c-p	2.97723e-13	0.450523	0.891	0.951	4.18718e-09
UbcE2H	3.65514e-13	-0.342668	0.165	0.433	5.14058e-09
CG4116	3.95061e-13	0.499351	0.174	0.014	5.55614e-09
CG13227	4.05017e-13	-0.256498	0.017	0.236	5.69616e-09
Spn43Ab	4.91515e-13	-0.532162	0.283	0.589	6.91267e-09
CG44325	5.35621e-13	-0.444469	0.704	0.926	7.53297e-09
Df31	6.21721e-13	0.543704	0.809	0.899	8.74388e-09
CG31706	8.54129e-13	-0.536537	0.587	0.855	1.20125e-08
lncRNA:CR42862	8.7783e-13	-0.388572	0.365	0.63	1.23458e-08
ana	9.56905e-13	-0.701621	0.309	0.614	1.34579e-08
Cyp28d1	9.75345e-13	-1.1088	0.304	0.57	1.37173e-08
whd	1.15566e-12	-0.332667	0.165	0.43	1.62532e-08
CG9784	1.53036e-12	-0.469492	0.139	0.392	2.15229e-08
RpS14b	1.55639e-12	-0.320072	0.848	0.978	2.1889e-08
CG9691	1.63229e-12	-0.661467	0.6	0.871	2.29565e-08
CG9336	1.7937e-12	-0.29385	0.23	0.534	2.52266e-08
SLC22A	2.16317e-12	-0.555756	0.252	0.537	3.04228e-08
nrv3	2.61214e-12	0.619466	0.796	0.732	3.67371e-08
CG13096	2.77797e-12	0.404489	0.357	0.121	3.90694e-08
Cat	3.43784e-12	-0.401838	0.148	0.392	4.83498e-08
Nep4	4.76846e-12	-0.459337	0.343	0.636	6.70636e-08
CG45050	5.28715e-12	-0.409901	0.604	0.836	7.43584e-08
Zip99C	5.58187e-12	-0.389992	0.23	0.534	7.85034e-08
mt:ND2	5.81845e-12	-0.366726	0.543	0.852	8.18307e-08
Cyp1	6.78497e-12	0.293966	0.97	0.997	9.54239e-08
Adi1	6.87426e-12	-0.352566	0.335	0.589	9.66796e-08
CG13124	7.74881e-12	-0.297305	0.33	0.622	1.08979e-07
Rab7	9.32934e-12	-0.358333	0.417	0.652	1.31208e-07
nolo	9.44518e-12	-0.50161	0.335	0.608	1.32837e-07
AdSS	1.00072e-11	-0.363863	0.452	0.707	1.40742e-07
GstS1	1.09441e-11	-0.427312	0.465	0.764	1.53917e-07
Cyp12a4	1.52886e-11	-0.322994	0.196	0.46	2.15019e-07
CG16743	1.9304e-11	-0.623321	0.265	0.523	2.71492e-07
Picot	2.1706e-11	-0.607383	0.565	0.825	3.05274e-07
IP3K2	2.58263e-11	-0.368199	0.283	0.532	3.63221e-07
CG7637	2.61055e-11	0.76687	0.565	0.403	3.67148e-07
RNASEK	2.72231e-11	0.33697	0.878	0.945	3.82866e-07
Tpi	3.10283e-11	0.312078	0.948	0.978	4.36381e-07
CG30172	3.16064e-11	0.612184	0.709	0.696	4.44513e-07
CG16721	3.51851e-11	-0.271617	0.065	0.288	4.94844e-07
CG9686	5.1798e-11	-0.451419	0.778	0.981	7.28487e-07
glob1	6.2087e-11	-0.384304	0.313	0.553	8.73192e-07
mt:ND6	6.87848e-11	-0.327847	0.63	0.945	9.6739e-07
Pino	6.92388e-11	-0.476926	0.252	0.507	9.73774e-07
ced-6	1.03866e-10	-0.400277	0.404	0.677	1.46077e-06
CG10512	1.19563e-10	-0.334068	0.522	0.781	1.68153e-06
Rchy1	1.23971e-10	-0.29342	0.261	0.529	1.74352e-06
Cyp4ac3	1.29102e-10	-0.661059	0.143	0.381	1.81568e-06
Treh	1.38196e-10	-0.661569	0.417	0.682	1.94358e-06
Cyp6a20	1.405e-10	-0.410791	0.087	0.31	1.976e-06
l(1)G0193	1.53304e-10	-0.306419	0.335	0.592	2.15606e-06
Atg8a	2.00319e-10	-0.305588	0.626	0.825	2.81729e-06
RpL22	2.04371e-10	-0.266567	0.857	0.986	2.87428e-06
Rab1	2.11993e-10	-0.28299	0.578	0.836	2.98146e-06
P32	3.12023e-10	0.748646	0.552	0.436	4.38829e-06
mt:ATPase6	3.93578e-10	-0.263508	0.983	0.997	5.53527e-06
CG14210	4.42131e-10	0.542312	0.465	0.26	6.21813e-06
Pdcd4	5.30869e-10	-0.34291	0.496	0.762	7.46614e-06
CG11241	5.75245e-10	-0.461146	0.135	0.351	8.09024e-06
Pdk	6.14346e-10	-0.322552	0.452	0.677	8.64016e-06
SNF4Agamma	6.32158e-10	-0.305181	0.226	0.455	8.89067e-06
Non1	7.33873e-10	-0.277858	0.552	0.803	1.03212e-05
Hsp67Bc	8.77348e-10	0.678252	0.47	0.26	1.2339e-05
Lamp1	1.09202e-09	-0.289256	0.57	0.836	1.53582e-05
14-3-3epsilon	1.1851e-09	0.361045	0.93	0.97	1.66672e-05
CG30349	1.24455e-09	0.322005	0.274	0.088	1.75034e-05
NTPase	1.34429e-09	-0.270703	0.243	0.482	1.89061e-05
CG11426	1.5815e-09	-0.321163	0.283	0.515	2.22422e-05
CG13397	1.88039e-09	-0.452866	0.104	0.307	2.64457e-05
Nlp	2.06169e-09	0.458838	0.77	0.871	2.89956e-05
lncRNA:CR40469	2.32617e-09	-0.80797	0.265	0.507	3.27152e-05
CG18178	2.58123e-09	0.2727	0.252	0.077	3.63024e-05
CG9547	2.89227e-09	-0.256191	0.13	0.345	4.0677e-05
InR	3.45401e-09	-0.361305	0.378	0.578	4.85772e-05
CG7006	3.75619e-09	0.567758	0.343	0.148	5.28271e-05
retm	3.96539e-09	-0.349956	0.33	0.567	5.57692e-05
GC1	4.31148e-09	-0.319468	0.365	0.589	6.06366e-05
Idgf4	4.63591e-09	-0.571049	0.548	0.759	6.51994e-05
eIF2beta	5.37507e-09	0.65167	0.643	0.636	7.55949e-05
Cp1	5.57569e-09	-0.294075	0.417	0.636	7.84165e-05
CG42613	6.10949e-09	-0.505014	0.496	0.756	8.59239e-05
D2hgdh	7.74105e-09	-0.277978	0.113	0.315	0.00010887
CG43693	8.77724e-09	-0.48223	0.552	0.775	0.000123443
CG9107	9.09741e-09	0.29003	0.265	0.09	0.000127946
Sec61beta	1.08422e-08	0.567137	0.657	0.638	0.000152484
CBP	1.10465e-08	-0.261107	0.122	0.321	0.000155357
REPTOR	1.55007e-08	-0.322036	0.317	0.523	0.000218002
Hsc70-3	1.78692e-08	0.769683	0.539	0.422	0.000251313
Dh44-R2	1.78987e-08	-0.347841	0.143	0.337	0.000251727
Act5C	1.84602e-08	0.309897	0.952	0.984	0.000259625
CG12896	1.97428e-08	-0.431645	0.065	0.244	0.000277662
Tsp42Ef	2.03495e-08	-0.269957	0.343	0.562	0.000286196
Msr-110	2.08571e-08	-0.563574	0.343	0.573	0.000293335
Glut4EF	2.75025e-08	-0.403513	0.43	0.616	0.000386795
CG5254	2.92836e-08	-0.285095	0.509	0.759	0.000411844
Zip71B	2.93164e-08	-0.354443	0.157	0.353	0.000412306
Nop56	3.00256e-08	0.63968	0.5	0.356	0.00042228
CG9752	3.26345e-08	0.324193	0.296	0.118	0.000458972
Oat	3.28014e-08	-0.33398	0.23	0.441	0.000461319
Spn88Ea	3.62412e-08	-0.271774	0.387	0.625	0.000509697
Sec61gamma	3.67161e-08	0.501027	0.678	0.652	0.000516375
CDase	3.84545e-08	-0.336023	0.357	0.616	0.000540824
Ldh	4.20956e-08	0.317935	0.978	0.978	0.000592032
CCT1	4.52923e-08	0.491874	0.417	0.238	0.000636991
Gapdh2	4.82731e-08	0.256961	1	0.995	0.000678912
Trx-2	4.93899e-08	0.40178	0.752	0.847	0.000694619
CG2852	5.00215e-08	-0.34224	0.957	0.986	0.000703503
CG9286	5.07712e-08	0.295688	0.274	0.104	0.000714046
CG31663	5.14842e-08	-0.383281	0.348	0.578	0.000724074
CG10527	5.51611e-08	-0.304128	0.696	0.94	0.000775785
CG2064	5.77523e-08	-0.279465	0.13	0.31	0.000812228
Reg-5	8.48023e-08	-0.299876	0.165	0.367	0.00119266
Esyt2	9.29453e-08	-0.267499	0.283	0.49	0.00130718
nop5	9.39183e-08	0.6206	0.461	0.29	0.00132087
CG14945	9.50151e-08	-0.345768	0.317	0.567	0.00133629
CG30460	9.90248e-08	-0.306707	0.074	0.236	0.00139268
CG11563	1.02707e-07	0.394375	0.317	0.14	0.00144447
La	1.07042e-07	0.545102	0.47	0.312	0.00150544
Rbm13	1.08885e-07	0.303696	0.261	0.099	0.00153136
CG31122	1.12477e-07	-0.259348	0.109	0.29	0.00158188
CG12576	1.23018e-07	-0.250063	0.135	0.312	0.00173013
Fkbp39	1.2372e-07	0.605235	0.561	0.51	0.00174
rudhira	1.41142e-07	-0.279241	0.313	0.512	0.00198502
p23	1.96089e-07	0.410325	0.722	0.805	0.0027578
Mdh1	2.08327e-07	-0.291571	0.696	0.912	0.00292992
mgl	2.236e-07	-0.28723	0.483	0.729	0.00314471
CG11583	2.24341e-07	0.423552	0.304	0.14	0.00315513
Vha36-3	2.86518e-07	-0.300877	0.513	0.732	0.00402959
Pfdn6	2.86674e-07	0.608415	0.587	0.507	0.00403178
Obp44a	2.87884e-07	-0.409177	0.935	0.995	0.0040488
Nop60B	3.10824e-07	0.603651	0.517	0.416	0.00437143
Elal	3.18915e-07	-0.334514	0.183	0.378	0.00448521
nclb	3.21779e-07	0.39727	0.335	0.162	0.0045255
Pglym78	4.10933e-07	0.297077	0.978	0.989	0.00577936
edl	4.16671e-07	-0.258723	0.165	0.353	0.00586007
HDAC1	4.51004e-07	0.33648	0.309	0.14	0.00634293
Ran	4.54712e-07	0.54445	0.617	0.603	0.00639506
CG11837	4.61478e-07	0.338575	0.235	0.088	0.00649023
CG43222	4.78885e-07	0.600114	0.452	0.279	0.00673504
Hsp60A	5.24277e-07	0.502746	0.652	0.69	0.00737343
Aldh	6.24795e-07	-0.277817	0.639	0.901	0.00878711
CG9003	6.50787e-07	-0.258466	0.239	0.425	0.00915267
Surf6	6.60348e-07	0.320002	0.265	0.115	0.00928713
Pus1	7.26848e-07	0.291133	0.23	0.085	0.0102224
pit	8.98289e-07	0.300705	0.257	0.104	0.0126335
eff	9.23165e-07	0.384639	0.748	0.863	0.0129834
CG12163	9.70557e-07	-0.277731	0.357	0.534	0.0136499
CG1607	1.09674e-06	-0.288942	0.522	0.734	0.0154245
chic	1.12026e-06	0.407329	0.752	0.814	0.0157554
Hr4	1.18538e-06	0.393157	0.343	0.175	0.0166712
eEF1delta	1.21709e-06	0.531819	0.617	0.605	0.0171172
Jra	1.24773e-06	-0.330106	0.148	0.307	0.0175481
bor	1.35827e-06	0.38511	0.27	0.118	0.0191027
CG6937	1.50773e-06	0.276059	0.304	0.14	0.0212048
Rrp40	1.5389e-06	0.274741	0.287	0.129	0.0216431
Cys	1.60963e-06	-0.289942	0.643	0.885	0.0226378
DnaJ-1	1.62673e-06	0.548613	0.378	0.211	0.0228783
CG13773	1.695e-06	0.255682	0.209	0.077	0.0238385
CG7646	1.75283e-06	0.657689	0.587	0.501	0.0246518
nero	2.01721e-06	0.260938	0.23	0.088	0.0283701
Hsp70Bc	2.19325e-06	0.371841	0.109	0.019	0.0308458
CG32368	2.30991e-06	-0.585725	0.017	0.126	0.0324866
CG9328	2.33968e-06	-0.283252	0.335	0.534	0.0329052
SerRS	2.44106e-06	0.46151	0.391	0.23	0.034331
Nopp140	2.67266e-06	0.304244	0.287	0.134	0.0375883
mRpL52	2.72605e-06	0.465075	0.448	0.293	0.0383391
CaBP1	2.81364e-06	0.408127	0.374	0.214	0.039571
Pdf	2.96147e-06	0.29104	0.248	0.107	0.0416502
Sod1	3.80842e-06	0.273817	0.87	0.942	0.0535616
UQCR-11	4.28836e-06	0.273663	0.826	0.896	0.0603115
CG9922	4.36978e-06	0.528058	0.478	0.348	0.0614566
mRpL20	4.51797e-06	0.364269	0.422	0.266	0.0635408
hebe	4.6751e-06	-0.319994	0.191	0.34	0.0657506
CG1542	6.08347e-06	0.334659	0.278	0.134	0.085558
CG5114	6.13429e-06	0.261342	0.213	0.085	0.0862727
CG17839	7.14687e-06	-0.317953	0.109	0.252	0.100514
Rs1	7.76116e-06	0.314998	0.235	0.101	0.109153
CG8939	7.97447e-06	0.308978	0.196	0.074	0.112153
CG8860	8.29332e-06	0.465018	0.648	0.729	0.116637
Tim9a	9.2062e-06	0.483981	0.435	0.318	0.129476
Nop17l	1.17544e-05	-0.262332	0.278	0.449	0.165314
SP1173	1.1757e-05	-0.275743	0.178	0.334	0.16535
CG6356	1.24868e-05	-0.345497	0.378	0.603	0.175614
Hsc70Cb	1.3172e-05	0.40042	0.343	0.205	0.185251
CG4866	1.3372e-05	0.353963	0.378	0.23	0.188063
CG43813	1.39052e-05	-0.263421	0.209	0.384	0.195562
CG14543	1.43109e-05	0.258198	0.33	0.181	0.201268
nudC	1.43476e-05	0.253188	0.313	0.162	0.201784
CG6084	1.51761e-05	0.522467	0.578	0.523	0.213437
PCNA	1.61726e-05	0.474023	0.404	0.266	0.227452
Argk	1.74912e-05	0.315687	0.839	0.942	0.245997
alphaTub84D	1.80801e-05	0.526914	0.509	0.419	0.254279
SmF	1.94979e-05	0.450532	0.461	0.345	0.274219
Tom7	2.05099e-05	0.278983	0.778	0.882	0.288452
CG17734	2.56472e-05	0.552582	0.543	0.46	0.360702
GstZ2	2.62359e-05	0.534303	0.404	0.258	0.368982
Tom20	2.73181e-05	0.368818	0.691	0.805	0.384201
CG3756	2.90752e-05	0.268775	0.226	0.104	0.408914
CG3598	3.30441e-05	0.477129	0.191	0.082	0.464732
Gp93	3.44508e-05	0.381064	0.396	0.26	0.484516
CG1671	4.16786e-05	0.292235	0.148	0.052	0.586168
GLS	4.35909e-05	0.325975	0.191	0.079	0.613063
CNBP	5.05397e-05	0.39656	0.722	0.858	0.710791
mtSSB	5.75938e-05	0.427863	0.435	0.307	0.81
RpLP0-like	6.00623e-05	0.494058	0.409	0.288	0.844716
CCT5	6.1758e-05	0.513661	0.478	0.416	0.868564
CG14423	6.85036e-05	0.668274	0.257	0.148	0.963435
CG13364	7.43031e-05	0.324672	0.722	0.871	1
apolpp	7.94872e-05	-0.401769	0.33	0.496	1
mRpS10	8.37432e-05	0.405665	0.4	0.279	1
Art1	9.5394e-05	0.423864	0.413	0.288	1
atilla	0.000109736	-0.505472	0.226	0.375	1
128up	0.000111135	0.282582	0.33	0.197	1
eIF1	0.000115213	0.290196	0.709	0.767	1
shep	0.000116186	0.307826	0.761	0.833	1
LSm3	0.000116316	0.395254	0.422	0.29	1
Vha14-1	0.000123821	0.320593	0.748	0.838	1
CG3594	0.000126443	0.286876	0.239	0.121	1
AstC	0.000126788	0.257207	0.313	0.181	1
CCT7	0.00013726	0.369784	0.474	0.356	1
fax	0.000138168	0.501681	0.657	0.63	1
Ilp2	0.000152885	0.67538	0.535	0.627	1
Xrp1	0.000153732	-0.318708	0.47	0.649	1
Gbeta13F	0.000169397	0.334392	0.822	0.863	1
geminin	0.000172523	0.294737	0.304	0.175	1
Non3	0.000174374	0.322673	0.304	0.181	1
Ggamma30A	0.000197348	0.512119	0.67	0.677	1
Ama	0.00020687	-0.293407	0.383	0.545	1
CG40045	0.000223249	0.380971	0.648	0.751	1
SmD3	0.000250092	0.390683	0.465	0.367	1
CG3817	0.000266035	0.284428	0.243	0.129	1
Rpb5	0.000272506	0.385809	0.413	0.301	1
Gat	0.000285938	0.535116	0.791	0.86	1
mod	0.000288568	0.513806	0.574	0.578	1
Ccdc58	0.000294523	0.324291	0.4	0.279	1
CG11555	0.000298284	0.305514	0.257	0.145	1
CG12975	0.000306325	0.258039	0.287	0.17	1
CG8498	0.000309385	0.400882	0.657	0.721	1
hoe1	0.000322895	-0.322229	0.561	0.715	1
His3.3A	0.00033425	0.29268	0.709	0.803	1
Sms	0.000370315	0.290259	0.274	0.159	1
san	0.000373185	0.385152	0.435	0.337	1
CG3226	0.000385295	0.383177	0.417	0.312	1
mRpL18	0.000393565	0.334574	0.33	0.214	1
CG11089	0.000402831	0.261213	0.239	0.132	1
O-fut1	0.000410958	0.253598	0.213	0.11	1
Non2	0.000412885	0.379559	0.435	0.334	1
Optix	0.000419421	0.29224	0.204	0.104	1
Tapdelta	0.000437321	0.354284	0.639	0.737	1
Taldo	0.000480753	0.418937	0.626	0.666	1
SNRPG	0.000515163	0.465421	0.552	0.532	1
CG14141	0.00052903	0.569379	0.583	0.493	1
SmD1	0.000542913	0.307228	0.391	0.277	1
Dph5	0.000590461	0.369286	0.391	0.29	1
NANS	0.000593363	0.342967	0.396	0.271	1
Roc1a	0.000601569	0.345532	0.63	0.707	1
sqd	0.000654121	0.299197	0.709	0.811	1
CG34132	0.000655708	0.416556	0.596	0.636	1
Set	0.00068235	0.442854	0.474	0.389	1
scf	0.00069627	0.476789	0.522	0.444	1
mRpL12	0.000750951	0.449228	0.5	0.433	1
CG13373	0.000760779	0.359478	0.23	0.129	1
boca	0.000771167	0.268474	0.357	0.247	1
CCT4	0.000840694	0.455558	0.5	0.433	1
CG10286	0.00089501	0.262198	0.261	0.156	1
Fib	0.000896732	0.403396	0.483	0.403	1
MFS3	0.000915523	0.651443	0.535	0.474	1
SC35	0.000917629	0.421142	0.461	0.37	1
CG31522	0.000918993	0.287824	0.291	0.175	1
Dh31	0.000925532	0.369871	0.352	0.241	1
dpr7	0.00093148	0.432613	0.378	0.271	1
kdn	0.000939176	0.354599	0.283	0.181	1
Uhg4	0.000962347	0.30487	0.5	0.392	1
CCT2	0.000970967	0.294936	0.37	0.258	1
RpII18	0.00104721	0.435138	0.517	0.493	1
Pfdn1	0.00106842	0.386011	0.47	0.403	1
Bin1	0.00115923	0.336344	0.361	0.255	1
Tsp5D	0.00124932	0.770801	0.591	0.54	1
CG7607	0.00129703	0.648569	0.557	0.447	1
mRpS18A	0.00137109	0.376006	0.417	0.321	1
SmE	0.00138151	0.414696	0.509	0.477	1
CG34163	0.00148529	0.277595	0.265	0.162	1
CG6878	0.00156375	0.425918	0.535	0.518	1
CG17593	0.00158202	0.336185	0.361	0.252	1
CG9849	0.00162459	0.283957	0.257	0.153	1
SpdS	0.00163955	0.284337	0.339	0.233	1
Pen	0.00165768	0.360565	0.274	0.17	1
x16	0.00168724	0.270048	0.313	0.203	1
Tudor-SN	0.00174816	0.336904	0.343	0.244	1
CG15210	0.00178388	0.309687	0.183	0.096	1
Aos1	0.00178927	0.305792	0.309	0.208	1
CG1307	0.00180129	0.30714	0.396	0.293	1
CG1703	0.00183119	0.302517	0.278	0.181	1
spoon	0.00211648	0.282158	0.33	0.227	1
CG9705	0.00211695	0.25715	0.374	0.271	1
peng	0.00214702	0.343167	0.243	0.145	1
TrpRS	0.00216653	0.259897	0.183	0.101	1
SelD	0.00218883	0.283122	0.287	0.192	1
mRpL32	0.00225568	0.269563	0.343	0.247	1
mRpS17	0.00236674	0.251873	0.322	0.211	1
CG10214	0.00239067	0.264231	0.257	0.162	1
AsnRS	0.00260752	0.30543	0.365	0.26	1
Sem1	0.00272342	0.364096	0.548	0.573	1
SPARC	0.00283905	0.264503	0.274	0.167	1
CG2021	0.00284874	0.26406	0.352	0.249	1
CG34310	0.00287457	0.259123	0.148	0.071	1
vig	0.00304613	0.386962	0.609	0.63	1
Dhpr	0.00333132	0.254856	0.383	0.279	1
Mdh2	0.00340671	0.290069	0.704	0.781	1
U2af38	0.00344927	0.308839	0.317	0.211	1
CCT6	0.00357831	0.46625	0.404	0.329	1
CG11076	0.00358854	0.325968	0.335	0.241	1
AhcyL1	0.00376925	0.427339	0.287	0.195	1
Pcd	0.00383383	0.375424	0.483	0.416	1
Rbp6	0.00385349	0.487176	0.522	0.458	1
rin	0.00393582	0.556046	0.496	0.463	1
CCT3	0.00396961	0.39109	0.457	0.408	1
lncRNA:Hsromega	0.0041097	0.497279	0.726	0.759	1
pum	0.00421267	0.493979	0.804	0.811	1
CG17036	0.00421973	0.394886	0.165	0.093	1
FASN1	0.00453638	0.36701	0.339	0.247	1
Tm1	0.0045749	0.307428	0.739	0.847	1
Tre1	0.0047454	0.411518	0.322	0.222	1
CG11781	0.00479999	0.404822	0.574	0.605	1
CG6126	0.00482055	0.49968	0.187	0.11	1
tsu	0.00486408	0.390232	0.47	0.43	1
prim	0.00492222	0.262723	0.226	0.14	1
CCT8	0.00507455	0.378183	0.457	0.4	1
Eb1	0.00511479	0.445435	0.5	0.485	1
CG6329	0.00520237	0.429268	0.448	0.342	1
CG31344	0.00553549	0.259922	0.226	0.137	1
mRpL27	0.00572852	0.338707	0.413	0.323	1
MED26	0.00575674	0.321706	0.413	0.326	1
CG15168	0.0060094	0.391066	0.483	0.441	1
Usp10	0.00601222	0.303776	0.283	0.197	1
dod	0.00611037	0.313163	0.4	0.321	1
Syx1A	0.0066726	0.390964	0.635	0.625	1
CG30197	0.00667676	-0.452624	0.396	0.499	1
Cbp53E	0.00670989	0.408848	0.552	0.501	1
Eip71CD	0.00674788	0.343266	0.27	0.181	1
CG4462	0.00676714	0.262064	0.13	0.066	1
CG14321	0.00739807	0.285734	0.239	0.159	1
mRpL48	0.00745772	0.349671	0.343	0.26	1
Nadsyn	0.00754213	0.364836	0.274	0.186	1
Fas3	0.00807861	0.27898	0.239	0.156	1
Slc45-1	0.00812467	-0.286402	0.178	0.263	1
CG9657	0.00846225	0.409793	0.548	0.447	1
bel	0.00872241	0.384333	0.517	0.482	1
Uch-L5	0.00874523	0.280237	0.248	0.164	1
Act42A	0.00928374	0.416837	0.474	0.438	1
CG7519	0.00937193	0.269392	0.291	0.205	1
CG10470	0.00937632	0.373245	0.543	0.595	1
CG5323	0.00959746	0.323918	0.304	0.227	1
mge	0.00965623	0.332032	0.53	0.51	1
CG3609	0.00970226	0.372983	0.422	0.359	1
CG14270	0.0100607	0.251025	0.261	0.178	1
mRpL21	0.0101067	0.274208	0.339	0.244	1
GstD9	0.0106421	-0.437515	0.252	0.332	1
SmB	0.0106444	0.398382	0.487	0.488	1
AlaRS	0.0107828	0.285334	0.23	0.153	1
Ntf-2	0.0108923	0.394711	0.517	0.507	1
Nxt1	0.0116751	0.318901	0.448	0.397	1
CG6195	0.0119269	0.420909	0.352	0.277	1
CG33958	0.0121459	0.413067	0.243	0.167	1
dpr21	0.0123811	0.29361	0.317	0.233	1
icln	0.0131692	0.266155	0.291	0.211	1
Arf102F	0.0132281	0.412802	0.561	0.603	1
CG15019	0.013566	0.40224	0.496	0.51	1
Rpn2	0.0137069	0.320253	0.317	0.233	1
eIF6	0.0137959	0.376149	0.357	0.282	1
Rac1	0.0138193	0.360072	0.504	0.441	1
fend	0.0141453	0.265503	0.17	0.104	1
CaMKII	0.0153105	0.41099	0.487	0.452	1
ND-AGGG	0.0154494	0.294981	0.674	0.781	1
CG3760	0.0176375	0.391242	0.461	0.4	1
Hrb27C	0.0176409	0.276017	0.687	0.822	1
CG31460	0.0182112	0.273497	0.3	0.227	1
RnpS1	0.0186938	0.260545	0.33	0.263	1
Hrb98DE	0.0206249	0.375509	0.461	0.414	1
dUTPase	0.0206413	0.320888	0.461	0.444	1
Rab27	0.0208556	0.308952	0.335	0.26	1
CG1416	0.0218601	0.293357	0.37	0.307	1
CG6024	0.0227564	0.253777	0.17	0.107	1
mRpS24	0.0231565	0.313062	0.409	0.332	1
VhaM9.7-a	0.0242194	0.453678	0.457	0.414	1
CG32276	0.0243934	0.293998	0.622	0.742	1
PDCD-5	0.0244203	0.347982	0.409	0.353	1
Tnpo	0.0246326	0.272101	0.291	0.211	1
nmo	0.0246794	0.412349	0.47	0.427	1
mRpL11	0.0250717	0.261714	0.252	0.181	1
Der-1	0.0250747	0.355006	0.352	0.282	1
mRpS33	0.0260116	0.328139	0.457	0.411	1
CG31705	0.0260788	-0.350859	0.643	0.786	1
mRpL14	0.0262011	0.313502	0.452	0.403	1
uex	0.0267674	0.350388	0.404	0.34	1
CG3527	0.0273613	0.259334	0.257	0.186	1
CG15717	0.0276844	0.263217	0.309	0.238	1
mgr	0.0279061	0.304712	0.413	0.364	1
Rpb11	0.0303653	0.317624	0.417	0.378	1
Ost48	0.0307907	0.373053	0.478	0.471	1
Manf	0.0321241	0.360481	0.513	0.512	1
CG31030	0.0332977	0.382796	0.439	0.392	1
Pfdn5	0.0345557	0.37204	0.504	0.529	1
klg	0.0350969	0.368956	0.404	0.342	1
mRpS16	0.0355699	0.313588	0.457	0.416	1
CG32017	0.0363234	0.286924	0.283	0.216	1
grp	0.0366419	0.322828	0.313	0.249	1
GstD3	0.0368605	0.351454	0.326	0.258	1
janA	0.0368937	0.342206	0.417	0.378	1
PH4alphaEFB	0.0372066	0.2611	0.296	0.227	1
Droj2	0.037391	0.347008	0.43	0.419	1
CG42342	0.0385096	0.764665	0.713	0.74	1
CG10550	0.040558	0.321476	0.322	0.255	1
CG13920	0.0417859	0.325244	0.37	0.299	1
bsk	0.0436356	0.438068	0.422	0.378	1
CG33129	0.0437335	0.279238	0.591	0.693	1
Bap55	0.0441505	0.252567	0.317	0.255	1
kud	0.0448401	0.335442	0.5	0.521	1
CG11444	0.0454679	0.296147	0.491	0.452	1
qtc	0.0479553	0.257425	0.2	0.142	1
Ssb-c31a	0.0486564	0.366171	0.448	0.433	1
Phf5a	0.0488634	0.289756	0.404	0.375	1
Sce	0.048897	0.315751	0.196	0.14	1
nAChRbeta1	0.0531006	0.252265	0.326	0.26	1
CG14312	0.0531158	0.331632	0.37	0.315	1
CSN8	0.0532662	0.330735	0.352	0.299	1
CG17776	0.0541926	0.363591	0.483	0.49	1
Ms	0.0559191	0.386025	0.578	0.649	1
miple1	0.0585397	0.392151	0.652	0.718	1
Tim8	0.0587756	0.322855	0.535	0.595	1
Galphao	0.0612135	0.407378	0.474	0.452	1
eIF5	0.0631138	0.269577	0.387	0.337	1
ReepB	0.0633389	0.30223	0.617	0.737	1
CG8891	0.0656126	0.258213	0.404	0.364	1
Hydr2	0.0658516	0.317658	0.339	0.279	1
CG14989	0.0674928	0.374442	0.73	0.808	1
Dpy-30L1	0.0683901	0.255831	0.278	0.214	1
Roe1	0.0687026	0.268368	0.365	0.312	1
Rsf1	0.0687472	0.347805	0.5	0.488	1
CG42668	0.0705223	0.295022	0.357	0.285	1
Hex-A	0.0722968	0.461121	0.478	0.447	1
B52	0.0773455	0.343609	0.53	0.559	1
Vha68-1	0.0775788	0.316434	0.348	0.293	1
EloC	0.0797823	0.250289	0.561	0.619	1
Phb2	0.0800967	0.282033	0.491	0.518	1
lwr	0.0802551	0.348044	0.552	0.638	1
Tom40	0.0812704	0.26157	0.339	0.288	1
CG7185	0.0818598	0.258497	0.278	0.23	1
SmD2	0.0832901	0.346182	0.522	0.567	1
mRpL36	0.0848383	0.312722	0.387	0.345	1
CG10674	0.0850604	0.306163	0.5	0.521	1
su(w[a])	0.0857583	0.344139	0.178	0.129	1
mahe	0.0875589	0.291598	0.283	0.225	1
HnRNP-K	0.0883035	0.282681	0.391	0.337	1
CG5885	0.0925789	0.343294	0.478	0.534	1
AANAT1	0.0941704	0.280393	0.178	0.129	1
l(1)G0320	0.0964897	0.293572	0.443	0.444	1
Jupiter	0.0969607	0.287436	0.322	0.274	1
SdhA	0.0978553	0.283062	0.335	0.274	1
CG17272	0.0985847	0.264599	0.335	0.282	1
CG17514	0.100085	0.329448	0.391	0.386	1
bbc	0.103852	0.264292	0.361	0.304	1
rost	0.103918	0.464056	0.174	0.123	1
CG6465	0.104858	0.345311	0.517	0.501	1
fne	0.104993	0.508599	0.565	0.584	1
fwe	0.10677	0.360849	0.478	0.444	1
ND-B17.2	0.110623	0.262699	0.639	0.748	1
CG4230	0.11239	0.335955	0.248	0.203	1
Dad1	0.114899	0.272635	0.543	0.636	1
Larp4B	0.114967	0.283082	0.322	0.277	1
Maf1	0.11818	0.327044	0.413	0.373	1
ct	0.122279	0.398013	0.517	0.521	1
Tim23	0.122481	0.34288	0.461	0.466	1
Sgt	0.124284	0.293177	0.526	0.532	1
Pvf3	0.124523	0.325197	0.226	0.178	1
Pfdn4	0.125732	0.410116	0.452	0.458	1
Rdl	0.126522	0.262653	0.543	0.54	1
me31B	0.128325	0.324491	0.465	0.433	1
Tsp66E	0.131075	0.460506	0.583	0.608	1
Tsp42Ej	0.13143	0.337219	0.391	0.359	1
Hel25E	0.132212	0.287284	0.439	0.433	1
l(2)37Cc	0.133166	0.276043	0.539	0.627	1
Rm62	0.138464	0.326517	0.604	0.666	1
l(2)k09913	0.144302	0.298558	0.626	0.729	1
CG43324	0.148232	0.381546	0.5	0.507	1
mRpL1	0.150423	0.307726	0.357	0.315	1
Rh50	0.15184	0.320628	0.161	0.123	1
CG1552	0.154765	-0.286154	0.557	0.611	1
CG9914	0.158564	0.343326	0.322	0.279	1
lncRNA:CR43283	0.162371	0.26255	0.287	0.373	1
kar	0.162679	0.262075	0.222	0.178	1
Cht2	0.164606	0.273818	0.178	0.142	1
His2Av	0.167037	0.258515	0.565	0.636	1
Atox1	0.168637	0.321131	0.483	0.474	1
CG8036	0.17425	0.272717	0.622	0.734	1
Rpi	0.17448	0.282619	0.57	0.638	1
7B2	0.174602	0.361868	0.522	0.586	1
CG14688	0.181629	0.347149	0.413	0.408	1
mod(mdg4)	0.186967	0.321438	0.313	0.271	1
Spase25	0.188814	0.367639	0.452	0.449	1
Prosbeta2	0.192023	0.260949	0.483	0.51	1
mRpS14	0.192082	0.275255	0.435	0.433	1
Shmt	0.193444	0.258431	0.439	0.441	1
ERp60	0.194435	0.294409	0.574	0.674	1
bru3	0.1955	0.296848	0.543	0.556	1
Dak1	0.197936	0.305276	0.504	0.526	1
Sec13	0.198328	0.30831	0.396	0.4	1
E(spl)mbeta-HLH	0.201506	0.293712	0.252	0.216	1
CG13994	0.206383	0.253404	0.278	0.233	1
Rpt6	0.215458	0.331516	0.435	0.427	1
NimA	0.217921	0.252641	0.248	0.205	1
hth	0.226443	0.299454	0.578	0.611	1
Rpt2	0.229626	0.281579	0.413	0.397	1
Tet	0.237078	0.488414	0.422	0.395	1
CG3678	0.244441	0.303676	0.465	0.485	1
Pdp1	0.245799	0.342021	0.674	0.753	1
CG9413	0.250855	0.27698	0.2	0.175	1
Ptp99A	0.269566	0.255397	0.43	0.408	1
dj-1beta	0.292828	0.291138	0.5	0.581	1
nSyb	0.294993	0.373376	0.47	0.474	1
CG10576	0.295158	0.277724	0.474	0.499	1
CG5065	0.298452	0.317081	0.535	0.553	1
sky	0.304432	0.322133	0.483	0.575	1
Got2	0.306585	0.294639	0.465	0.471	1
CG1943	0.306877	0.318914	0.374	0.367	1
CG5955	0.309275	0.40322	0.557	0.638	1
CG32982	0.309833	0.337474	0.213	0.186	1
Obp99a	0.310365	-0.281553	0.791	0.877	1
Pfdn2	0.316475	0.305789	0.491	0.532	1
Baldspot	0.329805	0.310453	0.487	0.518	1
bnl	0.336346	0.292781	0.274	0.247	1
mRpL42	0.33821	0.257925	0.439	0.436	1
GCS2alpha	0.339242	0.325593	0.43	0.433	1
CG7971	0.342334	0.282927	0.374	0.359	1
Cdc37	0.346009	0.262907	0.348	0.334	1
Eip63E	0.353976	0.300201	0.435	0.425	1
mRpL30	0.357502	0.251168	0.457	0.455	1
Nipped-B	0.367742	0.310966	0.461	0.468	1
nkd	0.3694	0.292547	0.37	0.348	1
CRMP	0.373041	0.372549	0.222	0.192	1
CG10863	0.373356	0.2639	0.417	0.389	1
Imp	0.378195	0.263774	0.665	0.77	1
mEFTu1	0.386726	0.261498	0.504	0.532	1
Xbp1	0.390014	0.298385	0.596	0.671	1
TM4SF	0.401823	0.349152	0.439	0.452	1
DENR	0.408045	0.254979	0.361	0.348	1
sty	0.411952	0.285544	0.443	0.422	1
capu	0.416832	0.348027	0.2	0.175	1
CG6094	0.417607	0.256391	0.339	0.326	1
Snap25	0.418853	0.30457	0.265	0.255	1
l(3)neo38	0.422279	0.286741	0.37	0.362	1
Cip4	0.456402	0.287985	0.222	0.203	1
igl	0.460728	0.445674	0.452	0.482	1
CG15201	0.460803	0.292499	0.139	0.164	1
jdp	0.476184	0.350557	0.53	0.586	1
Aac11	0.48216	0.315704	0.33	0.318	1
CG15203	0.503329	0.486336	0.387	0.373	1
schlank	0.504123	0.262106	0.517	0.556	1
CkIIbeta	0.506619	0.323092	0.465	0.496	1
gus	0.51264	0.26058	0.4	0.414	1
akirin	0.547442	0.297002	0.478	0.515	1
cmpy	0.557313	0.252548	0.248	0.236	1
CG11137	0.559602	0.300638	0.513	0.562	1
Prosap	0.56679	0.311038	0.543	0.556	1
robl	0.589377	0.255923	0.474	0.526	1
ATPCL	0.598533	0.394653	0.426	0.441	1
Dpck	0.615363	0.287855	0.313	0.315	1
CG13928	0.619528	0.303598	0.387	0.397	1
Sap47	0.626864	0.380451	0.622	0.699	1
Cchl	0.629605	0.253121	0.461	0.49	1
CG31235	0.66654	0.251883	0.322	0.323	1
Pomp	0.67164	0.275365	0.5	0.586	1
CG8671	0.677375	0.427008	0.417	0.444	1
CG13877	0.682564	-0.281627	0.183	0.192	1
CG5390	0.694681	0.288671	0.235	0.238	1
Sf3b6	0.716245	0.252697	0.465	0.512	1
Tlk	0.728861	0.260419	0.378	0.389	1
mei-P26	0.729025	0.344737	0.43	0.449	1
Pde9	0.776585	0.310218	0.557	0.589	1
Cnx99A	0.783532	0.260333	0.452	0.518	1
lncRNA:CR44832	0.796101	0.330945	0.483	0.578	1
SIFa	0.800677	0.35978	0.426	0.458	1
crol	0.807911	0.269214	0.522	0.603	1
fu12	0.821045	0.301671	0.383	0.408	1
wgn	0.82208	0.303824	0.204	0.219	1
mfas	0.830788	0.48284	0.387	0.4	1
veli	0.833988	0.319011	0.383	0.408	1
lncRNA:roX1	0.834455	0.27894	0.674	0.764	1
Sep2	0.86969	0.266253	0.417	0.458	1
CG8745	0.875361	0.281	0.161	0.164	1
mbf1	0.90424	0.250376	0.474	0.537	1
zfh2	0.938151	0.256548	0.365	0.37	1
sm	0.944461	0.265632	0.4	0.43	1
CG10340	0.961474	0.269787	0.396	0.436	1
exd	0.965111	0.259137	0.3	0.312	1
CG1358	0.976117	0.346545	0.496	0.562	1
lncRNA:CR43334	0.978047	0.467078	0.457	0.458	1

## Sheet: Glutamatergic neurons
Columna1	p_val	avg_logFC	pct.1	pct.2	p_val_adj
Fkbp12	9.28031e-66	0.613727	0.992	0.991	1.30518e-61
Pdcd4	5.86824e-63	-0.798059	0.85	0.983	8.25309e-59
Non1	2.7772e-60	-0.873186	0.63	0.914	3.90585e-56
RpL15	5.58021e-55	-0.405813	0.994	1	7.84801e-51
REPTOR-BP	3.84941e-50	-0.713357	0.596	0.92	5.41381e-46
Fer2LCH	6.14883e-47	-0.528453	0.932	0.994	8.64772e-43
unk	2.64561e-42	-0.680001	0.624	0.909	3.72078e-38
RpL5	1.78027e-41	-0.374939	0.989	0.998	2.50377e-37
betaTub56D	6.38932e-41	0.561883	0.994	0.996	8.98594e-37
Fer1HCH	1.73625e-40	-0.527188	0.904	0.981	2.44186e-36
Gapdh1	1.93558e-39	0.488687	0.994	0.996	2.7222e-35
RpL10Ab	3.96871e-39	-0.335347	0.98	0.998	5.58159e-35
Hsc70-4	1.31125e-38	0.505129	0.958	0.942	1.84414e-34
awd	5.5949e-38	0.592525	0.96	0.931	7.86867e-34
alphaTub84B	1.05975e-36	0.406802	0.992	0.996	1.49044e-32
CG5059	2.54235e-36	-0.700097	0.364	0.739	3.57556e-32
Hsp83	6.28505e-36	0.695591	0.915	0.685	8.83929e-32
RpL39	1.15799e-34	-0.301895	0.994	0.998	1.62859e-30
Ldh	1.16668e-34	0.53258	0.969	0.95	1.64082e-30
RpL28	4.15578e-34	-0.286502	0.986	1	5.84469e-30
hoip	4.56942e-34	0.67331	0.641	0.274	6.42643e-30
eEF1alpha1	6.19474e-34	-0.325513	0.997	1	8.71228e-30
MtnA	3.22041e-32	-0.563506	0.234	0.626	4.52918e-28
eIF3l	1.34676e-31	-0.565209	0.486	0.784	1.89408e-27
RpS27	5.64436e-31	-0.287672	0.994	0.998	7.93822e-27
Hsp26	8.9895e-31	0.652377	0.684	0.322	1.26428e-26
tsr	9.79568e-31	0.436366	0.98	0.959	1.37766e-26
RpL32	1.12012e-30	-0.297367	0.986	1	1.57534e-26
RpS25	3.83807e-30	-0.267105	1	1	5.39786e-26
smt3	6.69303e-30	0.387563	0.966	0.961	9.41307e-26
CG42566	1.2421e-29	-0.594685	0.169	0.533	1.74688e-25
Cyp1	2.27452e-29	0.335009	0.992	0.987	3.19888e-25
lncRNA:CR42862	2.37261e-28	-0.509468	0.814	0.935	3.33683e-24
CG43222	4.46634e-28	0.522106	0.898	0.803	6.28146e-24
CG12384	5.1065e-28	-0.56556	0.582	0.812	7.18178e-24
Eno	1.59697e-27	0.393717	0.997	1	2.24597e-23
CG9336	2.05097e-27	-0.506479	0.082	0.413	2.88449e-23
Nph	2.76294e-27	0.633947	0.684	0.378	3.8858e-23
RpS29	3.2784e-27	-0.260412	0.986	1	4.61075e-23
LTV1	4.07945e-27	-0.547984	0.401	0.706	5.73734e-23
Nlp	4.65035e-27	0.513307	0.893	0.801	6.54026e-23
InR	5.94392e-27	-0.604536	0.74	0.896	8.35953e-23
RpL21	6.69064e-27	-0.28077	0.989	0.998	9.40971e-23
chic	2.30605e-25	0.317624	0.977	0.985	3.24323e-21
CG2082	3.61886e-25	-0.686515	0.314	0.667	5.08957e-21
RpS9	4.55181e-25	-0.263313	0.989	1	6.40166e-21
RpL29	4.944e-25	-0.287356	0.98	0.996	6.95324e-21
RpL38	6.30468e-25	-0.287673	0.986	0.994	8.86691e-21
CG6770	7.28215e-25	-0.479477	0.924	0.963	1.02416e-20
pix	1.04947e-24	-0.531679	0.607	0.812	1.47597e-20
Lk6	1.38112e-24	-0.431088	0.85	0.955	1.94241e-20
Sirup	2.7868e-24	-0.50092	0.274	0.592	3.91935e-20
CG1572	2.94467e-24	-0.431795	0.138	0.46	4.14139e-20
RpL24-like	3.36378e-24	-0.426344	0.814	0.92	4.73082e-20
eIF3m	3.60975e-24	-0.454345	0.706	0.866	5.07676e-20
Ip259	7.62195e-24	-0.441322	0.723	0.877	1.07195e-19
RNASEK	1.40092e-23	0.356423	0.972	0.972	1.97026e-19
RpS3	4.12481e-23	-0.290453	0.944	0.996	5.80114e-19
PyK	6.59581e-23	0.333129	0.994	0.978	9.27635e-19
RpS20	8.136e-23	-0.262798	0.997	0.998	1.14425e-18
RpL41	9.06753e-23	-0.265087	0.994	1	1.27526e-18
RpL37A	1.05787e-22	-0.270984	0.972	1	1.48779e-18
CG17734	1.24135e-22	0.502102	0.788	0.564	1.74583e-18
SPARC	1.65699e-22	0.402115	0.299	0.05	2.3304e-18
fabp	3.29773e-22	0.596755	0.808	0.702	4.63793e-18
CG8369	1.28308e-21	-0.412788	0.246	0.568	1.80452e-17
CG44325	1.42891e-21	-0.493427	0.24	0.549	2.00962e-17
Pglym78	2.2277e-21	0.331694	0.989	0.996	3.13304e-17
CNBP	4.22641e-21	0.364939	0.901	0.886	5.94402e-17
CG32486	5.572e-21	-0.428072	0.302	0.594	7.83647e-17
eIF3g1	6.50058e-21	-0.428491	0.718	0.879	9.14242e-17
RpS30	9.75268e-21	-0.261998	0.969	0.994	1.37162e-16
Hsp67Bc	1.02401e-20	0.515977	0.876	0.685	1.44017e-16
Tpi	1.44745e-20	0.32812	0.997	0.985	2.03569e-16
RpS5a	2.5465e-20	-0.250999	0.972	0.998	3.5814e-16
GlyP	4.32579e-20	0.378887	0.938	0.916	6.08379e-16
RpL8	1.29201e-19	-0.259021	0.977	0.996	1.81708e-15
CG11267	1.33554e-19	0.465317	0.856	0.754	1.8783e-15
jhamt	2.09173e-19	-0.34466	0.045	0.292	2.94181e-15
COX7A	3.79905e-19	0.362128	0.941	0.924	5.34298e-15
RpL35	4.00756e-19	-0.270425	0.96	1	5.63624e-15
ATPsynC	4.15748e-19	0.268619	0.997	0.994	5.84708e-15
Argk	5.08596e-19	0.311327	0.952	0.968	7.15289e-15
Nop60B	1.37951e-18	0.428951	0.596	0.298	1.94014e-14
Uhg4	1.6614e-18	0.467926	0.613	0.35	2.33659e-14
CG10077	1.70585e-18	-0.312623	0.915	0.981	2.3991e-14
rin	2.1781e-18	0.378158	0.895	0.819	3.06327e-14
CG13227	3.71644e-18	-0.276645	0.008	0.21	5.2268e-14
NHP2	4.97542e-18	0.468515	0.542	0.285	6.99743e-14
eEF2	8.6085e-18	-0.291577	0.918	0.981	1.2107e-13
CG42394	9.30566e-18	-0.409795	0.797	0.918	1.30875e-13
rudhira	1.19427e-17	-0.409127	0.689	0.844	1.67962e-13
Tsp42Ee	4.70465e-17	-0.367419	0.771	0.892	6.61662e-13
CG14265	5.80748e-17	-0.26066	0.011	0.205	8.16764e-13
ringer	8.56668e-17	-0.30605	0.881	0.961	1.20482e-12
eEF5	8.95045e-17	-0.250854	0.955	0.996	1.25879e-12
maf-S	9.3121e-17	-0.364083	0.644	0.834	1.30965e-12
eIF3k	1.39051e-16	-0.344016	0.788	0.898	1.95561e-12
COX4	2.20035e-16	0.28076	0.946	0.942	3.09457e-12
Act42A	2.20552e-16	0.395598	0.884	0.866	3.10184e-12
Fkbp39	2.42307e-16	0.403132	0.636	0.406	3.4078e-12
lncRNA:CR42491	3.3669e-16	0.341176	0.282	0.073	4.7352e-12
Ric	4.0574e-16	-0.327265	0.864	0.933	5.70633e-12
CG9691	5.0247e-16	-0.367443	0.147	0.389	7.06674e-12
CG1545	5.1842e-16	-0.30067	0.079	0.309	7.29106e-12
sqd	6.71892e-16	0.315603	0.946	0.911	9.44949e-12
CG9821	9.48205e-16	-0.276444	0.997	1	1.33356e-11
CG9686	1.22787e-15	-0.354475	0.463	0.689	1.72688e-11
Rab7	1.43554e-15	-0.413657	0.571	0.758	2.01894e-11
COX6B	2.30127e-15	0.308712	0.955	0.957	3.23651e-11
Vha26	3.44598e-15	0.278632	0.946	0.929	4.84642e-11
alphaTub84D	3.73967e-15	0.430817	0.78	0.635	5.25947e-11
Dak1	4.14449e-15	0.340469	0.927	0.86	5.82881e-11
ATPsynF	9.22478e-15	0.295489	0.972	0.983	1.29737e-10
P32	9.61714e-15	0.387274	0.59	0.348	1.35255e-10
sun	1.10484e-14	0.309842	0.907	0.864	1.55384e-10
CCT5	1.12156e-14	0.324809	0.503	0.242	1.57736e-10
levy	1.41448e-14	0.272018	0.96	0.968	1.98932e-10
CG4364	1.73078e-14	-0.340477	0.381	0.607	2.43416e-10
CanB	3.04599e-14	0.274048	0.966	0.959	4.28389e-10
COX8	3.33398e-14	0.28322	0.946	0.937	4.6889e-10
Thor	6.48674e-14	-0.559101	0.46	0.65	9.12296e-10
Glut4EF	8.78581e-14	-0.312144	0.898	0.972	1.23564e-09
CG13551	1.05619e-13	-0.34479	0.537	0.775	1.48542e-09
Nop56	1.09712e-13	0.371272	0.576	0.346	1.543e-09
Hug	1.14004e-13	-0.318776	0.246	0.488	1.60335e-09
eIF3b	1.51373e-13	-0.297329	0.588	0.793	2.12891e-09
CG4612	2.09144e-13	0.315792	0.901	0.827	2.9414e-09
Jafrac1	2.69599e-13	0.311302	0.85	0.782	3.79164e-09
Inos	3.26009e-13	0.408819	0.647	0.454	4.58499e-09
blw	3.47322e-13	0.274289	0.977	0.961	4.88473e-09
ATPsynD	3.90802e-13	0.29978	0.927	0.916	5.49624e-09
HmgZ	5.44585e-13	-0.277136	0.96	0.994	7.65905e-09
CG13920	8.06917e-13	0.353857	0.876	0.79	1.13485e-08
Pgk	8.70701e-13	0.26174	0.969	0.978	1.22455e-08
CG5065	1.34075e-12	0.333673	0.853	0.741	1.88563e-08
AnxB9	2.76466e-12	-0.262874	0.099	0.296	3.88822e-08
Mnn1	2.85118e-12	-0.356976	0.438	0.6	4.00991e-08
nop5	3.18511e-12	0.289748	0.404	0.184	4.47953e-08
Tim8	4.60353e-12	0.364779	0.672	0.462	6.4744e-08
Non2	5.52638e-12	0.331537	0.774	0.667	7.7723e-08
CG7630	9.05829e-12	0.283543	0.955	0.968	1.27396e-07
roh	1.10222e-11	0.272644	0.921	0.92	1.55016e-07
CG7083	1.24192e-11	-0.250237	0.085	0.266	1.74664e-07
ATPsynE	1.27697e-11	0.290947	0.898	0.89	1.79593e-07
REPTOR	1.38952e-11	-0.332603	0.579	0.762	1.95422e-07
CG14312	1.57425e-11	0.303778	0.85	0.812	2.21402e-07
cathD	1.6059e-11	-0.317576	0.432	0.609	2.25854e-07
udd	1.87744e-11	-0.315163	0.203	0.408	2.64043e-07
Lamp1	2.01539e-11	-0.264922	0.664	0.825	2.83444e-07
CG33129	2.10394e-11	0.306983	0.831	0.728	2.95899e-07
CG7637	2.36813e-11	0.370144	0.638	0.449	3.33053e-07
ATPsynO	3.02222e-11	0.310243	0.879	0.877	4.25045e-07
Syx8	3.5975e-11	-0.262937	0.169	0.376	5.05952e-07
CG1695	4.56057e-11	-0.341465	0.52	0.711	6.41398e-07
Ran	8.98199e-11	0.307832	0.771	0.676	1.26323e-06
ATPsynCF6	9.07684e-11	0.255501	0.921	0.929	1.27657e-06
bigmax	1.16443e-10	-0.264106	0.153	0.341	1.63765e-06
CG6084	2.38671e-10	0.316834	0.333	0.151	3.35668e-06
Pfdn6	2.52929e-10	0.296044	0.726	0.607	3.5572e-06
eEF1delta	2.83856e-10	0.35479	0.573	0.387	3.99215e-06
CG42392	5.09286e-10	-0.301609	0.703	0.864	7.1626e-06
Calr	5.95816e-10	0.304055	0.938	0.914	8.37955e-06
vig	7.5325e-10	0.268505	0.845	0.788	1.05937e-05
Sec61gamma	7.69079e-10	0.266432	0.836	0.719	1.08163e-05
alc	8.61032e-10	-0.286269	0.486	0.654	1.21095e-05
FASN1	1.17455e-09	0.257957	0.401	0.201	1.65189e-05
IscU	1.68554e-09	-0.265927	0.619	0.749	2.37054e-05
eIF3f1	1.77512e-09	-0.272332	0.698	0.84	2.49652e-05
Hsc70-3	1.89144e-09	0.328399	0.777	0.618	2.66012e-05
Hel25E	2.06754e-09	0.314921	0.695	0.518	2.90779e-05
Tom7	2.17995e-09	0.262636	0.876	0.84	3.06588e-05
TfIIA-S	2.56716e-09	-0.263996	0.72	0.832	3.61046e-05
lncRNA:CR34335	2.66272e-09	-0.256612	0.977	0.998	3.74484e-05
eIF3a	3.26498e-09	-0.276398	0.506	0.657	4.59186e-05
HDAC1	3.79151e-09	0.296757	0.54	0.335	5.33238e-05
Vti1b	4.37719e-09	-0.269573	0.314	0.488	6.15608e-05
kud	4.46435e-09	0.301963	0.599	0.438	6.27866e-05
Mkp3	5.34984e-09	-0.281361	0.918	0.972	7.52402e-05
CG12576	6.53655e-09	-0.267478	0.342	0.521	9.19301e-05
CG42554	6.82577e-09	-0.262596	0.124	0.276	9.59976e-05
TyrRS	6.99387e-09	-0.252246	0.288	0.458	9.83617e-05
La	7.06756e-09	0.26355	0.475	0.283	9.93982e-05
eIF2beta	7.24739e-09	0.30396	0.723	0.605	0.000101927
SpdS	7.30459e-09	0.253451	0.359	0.184	0.000102732
CG14591	7.52212e-09	0.331786	0.689	0.516	0.000105791
CG31635	8.11419e-09	-0.271741	0.523	0.678	0.000114118
SmF	1.0409e-08	0.282775	0.534	0.352	0.000146393
CG2862	1.04917e-08	0.338265	0.63	0.505	0.000147555
Ntf-2	1.29962e-08	0.284039	0.754	0.633	0.000182778
CG4022	1.67118e-08	-0.271269	0.266	0.428	0.000235035
Rheb	2.00572e-08	-0.256722	0.506	0.648	0.000282085
mtSSB	2.09178e-08	0.271342	0.316	0.158	0.000294188
Pfdn5	2.63023e-08	0.268146	0.669	0.559	0.000369916
CG15309	3.27663e-08	-0.262453	0.22	0.389	0.000460825
SmE	4.33988e-08	0.299674	0.65	0.497	0.000610361
CG15891	4.59747e-08	-0.284598	0.37	0.518	0.000646589
Sms	6.52999e-08	0.279394	0.568	0.4	0.000918378
Ms	6.99418e-08	0.314097	0.703	0.579	0.000983662
dod	8.93502e-08	0.251055	0.599	0.406	0.00125662
Sidpn	8.96014e-08	-0.301989	0.314	0.479	0.00126015
Taf6	8.98597e-08	-0.250683	0.189	0.337	0.00126379
Ilp5	1.01454e-07	0.558632	0.266	0.14	0.00142685
mod	1.06627e-07	0.260002	0.531	0.359	0.0014996
CG4577	1.07978e-07	-0.451431	0.746	0.827	0.0015186
Tspo	1.39716e-07	-0.281965	0.345	0.497	0.00196497
Sec61beta	1.49118e-07	0.251826	0.777	0.713	0.00209719
EndoA	1.57584e-07	0.260473	0.867	0.795	0.00221627
CG3689	2.33323e-07	0.293937	0.621	0.469	0.00328145
Hrb98DE	2.60908e-07	0.256941	0.876	0.819	0.00366941
Got2	2.66274e-07	0.270048	0.424	0.261	0.00374488
Pfdn1	2.7451e-07	0.269247	0.619	0.451	0.00386071
Oatp74D	3.43728e-07	-0.271083	0.223	0.367	0.00483419
CG3625	3.55407e-07	0.256172	0.814	0.724	0.00499844
Set	3.78383e-07	0.264041	0.644	0.514	0.00532158
Hsp27	4.0251e-07	0.269926	0.387	0.227	0.0056609
CG5885	5.09457e-07	0.260912	0.593	0.43	0.007165
CCT4	5.27936e-07	0.261434	0.551	0.395	0.0074249
CCT7	6.36851e-07	0.254825	0.424	0.257	0.00895668
Bin1	6.48269e-07	0.262577	0.486	0.339	0.00911725
Sem1	6.86703e-07	0.256526	0.723	0.596	0.0096578
cer	7.3121e-07	-0.251812	0.212	0.348	0.0102837
CCT3	1.4293e-06	0.290161	0.531	0.393	0.0201017
CG6765	1.77944e-06	-0.265993	0.28	0.419	0.025026
CG12343	1.87545e-06	-0.273647	0.229	0.346	0.0263764
ERp60	2.45386e-06	0.255494	0.602	0.456	0.0345111
CG2680	3.47847e-06	0.320178	0.429	0.294	0.0489212
mRpL12	7.74789e-06	0.262751	0.548	0.425	0.108966
CG9003	8.30408e-06	-0.250626	0.251	0.371	0.116789
hth	8.75095e-06	-0.434832	0.723	0.795	0.123073
Tsp42Ek	9.96069e-06	0.253814	0.52	0.404	0.140087
fok	4.76716e-05	-0.263889	0.633	0.734	0.670453
Dh31	8.0869e-05	0.510644	0.444	0.315	1
Pvf3	9.18238e-05	0.276229	0.582	0.434	1
AstC	0.000158999	0.429721	0.297	0.177	1
bi	0.000317826	0.334656	0.508	0.378	1
Tk	0.000442493	0.411338	0.102	0.039	1
tnc	0.000769558	0.254214	0.161	0.084	1
Fas3	0.00146694	0.287471	0.387	0.289	1
Proc	0.00206346	-0.311875	0.277	0.38	1
AANAT1	0.00214529	0.295675	0.48	0.408	1
Sxl	0.00214543	-0.252697	0.887	0.907	1
disco-r	0.00299696	0.340444	0.172	0.102	1
D	0.00604523	-0.268075	0.076	0.136	1
Ilp2	0.0624198	0.432932	0.486	0.536	1
otp	0.0677986	0.328014	0.105	0.069	1
DIP-delta	0.0903256	-0.258649	0.138	0.181	1
CG6006	0.114189	0.606871	0.271	0.222	1
lncRNA:noe	0.117433	-0.677074	0.243	0.285	1
heph	0.147954	0.264313	0.766	0.732	1
Vmat	0.469541	-0.254139	0.347	0.315	1
hdc	0.59083	-0.409407	0.534	0.542	1
CCHa2	0.630556	0.308316	0.107	0.119	1
ImpL2	0.927665	0.664273	0.124	0.123	1

## Sheet: Hemocytes
Columna1	p_val	avg_logFC	pct.1	pct.2	p_val_adj
CG15550	0.0153758	-2.70949	0	0.162	1
Sirup	3.00985e-10	-2.392	0.424	0.853	4.23305e-06
Ance	1.50862e-10	-2.03385	0.03	0.75	2.12172e-06
CG6770	1.31144e-10	-1.88201	0.515	0.882	1.84441e-06
dpr17	8.8083e-09	-1.6901	0.182	0.735	0.00012388
CG1648	1.39428e-09	-1.50417	0.182	0.765	1.96092e-05
RpL10Ab	1.32016e-11	-0.463008	1	1	1.85667e-07
CG42566	1.99737e-09	-1.46438	0.758	0.926	2.8091e-05
Pdcd4	3.42134e-09	-1.41631	0.545	0.897	4.81178e-05
CG44325	2.29019e-06	-1.38463	0.303	0.735	0.0322093
Swim	1.59775e-10	-1.3149	0	0.735	2.24708e-06
pAbp	7.36704e-11	0.685609	1	1	1.0361e-06
CG14715	8.51181e-11	0.904653	1	0.985	1.1971e-06
Drat	3.34819e-06	-1.28049	0.515	0.794	0.047089
Tep4	1.39989e-05	-1.25246	0.818	0.838	0.19688
hdc	1.36704e-08	-1.21904	0.636	0.897	0.00019226
CG9336	7.41072e-09	-1.20991	0.091	0.721	0.000104224
CG3376	1.19733e-07	-1.19054	0.455	0.824	0.00168393
Lk6	1.69206e-09	-1.17019	0.515	0.882	2.37971e-05
Lst	2.28131e-05	-1.12766	0	0.412	0.320843
Sr-CIII	1.16479e-07	-1.10637	0.485	0.838	0.00163816
RpL36	3.35783e-10	-0.367446	1	1	4.72245e-06
RpL31	3.35783e-10	-0.471275	1	1	4.72245e-06
lncRNA:CR43855	1.69619e-06	-1.10052	0.697	0.897	0.0238552
Cp1	9.78512e-08	-1.06828	0.424	0.824	0.00137618
eEF1delta	4.01757e-10	0.864723	1	0.897	5.65031e-06
lqf	2.51603e-09	-1.06793	0.364	0.838	3.53854e-05
RpL40	4.43647e-10	-0.38323	1	1	6.23946e-06
Glut4EF	2.06977e-09	-1.015	0.455	0.882	2.91093e-05
ham	5.76337e-08	-1.01183	0.394	0.853	0.000810561
CG1092	4.97436e-09	1.00116	0.909	0.206	6.99594e-05
GILT3	9.36823e-10	-0.978687	0.091	0.75	1.31755e-05
Hsp83	2.31156e-07	1.03278	0.909	0.647	0.00325098
spz	6.99451e-08	1.04082	0.879	0.5	0.000983708
RpL41	1.98659e-09	-0.584132	1	1	2.79393e-05
CG34054	5.90564e-11	1.04162	0.909	0.191	8.30569e-07
ERp60	3.66799e-09	1.04493	1	0.897	5.15867e-05
RpS29	2.07711e-09	-0.462023	1	1	2.92124e-05
Gp93	1.36878e-07	1.05778	0.848	0.5	0.00192505
RpL24	2.59348e-09	-0.429059	1	1	3.64747e-05
Calr	5.09597e-10	1.06122	1	0.985	7.16698e-06
RpS27	3.09472e-09	-0.411695	1	1	4.35242e-05
CG2444	1.17951e-07	1.07864	0.97	0.618	0.00165887
RpL39	3.53136e-09	-0.607743	1	1	4.96651e-05
hoip	1.31144e-10	1.08519	1	0.647	1.84441e-06
RpS24	3.68982e-09	-0.407972	1	1	5.18936e-05
RpL7	3.85519e-09	-0.402046	1	1	5.42194e-05
CG34437	1.16942e-08	1.08529	0.879	0.221	0.000164467
Sec61beta	5.53418e-10	1.0955	0.939	0.912	7.78326e-06
nAChRbeta3	9.27953e-10	1.10691	0.939	0.353	1.30507e-05
Trx-2	7.54916e-09	0.792856	0.97	0.956	0.000106171
CG6310	1.0333e-07	1.11359	0.939	0.691	0.00145324
RpL5	9.16626e-09	-0.572063	0.97	1	0.000128914
CG11486	1.12273e-08	-0.97409	0.485	0.868	0.0001579
mnd	3.36547e-10	1.11531	0.909	0.779	4.73319e-06
mthl13	1.18613e-08	-0.955471	0	0.632	0.000166818
Cyp1	1.23523e-08	0.485682	1	1	0.000173722
CG3726	1.23841e-08	-0.83945	0.152	0.779	0.00017417
CG10131	1.29416e-08	0.872827	0.515	0.029	0.00018201
Rack1	1.34451e-08	-0.340227	1	1	0.000189091
LanB1	6.90581e-08	1.11677	0.909	0.706	0.000971233
Non1	1.4461e-08	-0.795935	0.667	0.941	0.00020338
CG14629	1.58879e-08	0.978914	0.97	0.779	0.000223447
scf	1.67782e-08	0.896878	0.909	0.471	0.000235968
CG14527	1.72189e-08	0.833484	0.636	0.088	0.000242167
RpL18A	1.80601e-08	-0.35262	1	1	0.000253998
Nplp2	1.88339e-08	0.728554	1	1	0.00026488
RpL35A	1.96398e-08	-0.344146	1	1	0.000276215
RpL23	1.96398e-08	-0.37978	1	1	0.000276215
Pdi	2.97505e-08	0.922111	0.939	0.971	0.000418411
RpL11	2.97779e-08	-0.382432	1	1	0.000418797
sPLA2	3.20162e-08	0.90015	0.788	0.221	0.000450275
Myo61F	3.27678e-08	0.855719	0.758	0.235	0.000460847
CG7900	3.3943e-08	-0.745089	0.121	0.706	0.000477374
RpL17	3.51218e-08	-0.303705	1	1	0.000493953
Cyp6a17	3.72255e-08	-0.839343	0.182	0.75	0.000523539
lncRNA:CR42862	3.75743e-08	-0.868814	0.394	0.809	0.000528445
Cyt-c-p	4.26013e-10	1.14974	0.939	0.721	5.99145e-06
Pep	4.31081e-08	-0.813577	0.394	0.838	0.000606273
Hipk	4.39214e-08	-0.78324	0.333	0.824	0.000617711
Pect	5.08043e-08	0.905338	0.848	0.574	0.000714511
CG10365	5.17453e-08	-0.740841	0.212	0.765	0.000727746
CG8860	5.2779e-08	0.780689	0.939	0.956	0.000742283
RpS17	5.50653e-08	-0.365882	1	1	0.000774438
sqd	5.61892e-08	0.685264	0.97	0.985	0.000790245
TRAM	1.45071e-10	1.18232	0.879	0.382	2.04028e-06
Cys	3.82146e-08	1.18557	0.939	0.735	0.00053745
CG43799	8.65226e-11	1.24636	0.97	0.265	1.21685e-06
RpL36A	8.9306e-08	-0.446246	0.97	1	0.001256
LanB2	3.80172e-10	1.26269	0.939	0.471	5.34673e-06
RpL12	1.00666e-07	-0.314456	1	1	0.00141577
SPARC	4.10111e-09	1.28753	1	0.471	5.7678e-05
odd	1.09538e-07	-0.662705	0	0.574	0.00154055
Eglp4	1.11639e-07	0.99136	0.848	0.5	0.00157009
CG31777	1.18524e-11	1.29074	0.97	0.912	1.66692e-07
loh	2.72336e-10	1.32069	0.879	0.25	3.83013e-06
CG34331	2.40357e-11	1.34679	1	0.456	3.38038e-07
dally	1.25124e-07	-0.782051	0.091	0.632	0.00175975
smt3	1.27719e-07	0.781453	0.939	1	0.00179625
Tina-1	1.28868e-07	0.91996	0.939	0.838	0.00181241
CG9005	1.29077e-07	-0.742495	0.182	0.691	0.00181534
Ance-5	2.77578e-11	1.37783	1	0.235	3.90385e-07
MtnA	1.40336e-07	-0.852602	0.273	0.794	0.00197369
RpS18	1.43781e-07	-0.411907	1	1	0.00202213
Adi1	1.46177e-07	-0.672696	0.273	0.735	0.00205583
CG14526	1.51573e-07	0.378878	0.364	0	0.00213172
unk	1.85627e-07	-0.70906	0.242	0.765	0.00261066
InR	1.8995e-07	-0.905029	0.485	0.853	0.00267145
chinmo	1.96544e-07	-0.660561	0.939	0.971	0.00276419
Tapdelta	1.9664e-07	0.715912	0.97	0.971	0.00276554
CG13868	1.98042e-07	-0.722099	0.333	0.824	0.00278527
Karl	1.98522e-07	0.992994	0.909	0.853	0.00279202
Sar1	2.19553e-07	0.661521	0.939	0.912	0.00308779
Hml	0.000278348	1.41135	0.424	0.118	1
RNASEK	2.38873e-07	0.606099	1	0.985	0.00335951
Papst2	2.49555e-07	0.635802	0.606	0.147	0.00350974
CG18812	2.54197e-07	-0.553286	0.152	0.662	0.00357503
Fkbp39	2.65676e-07	0.647007	0.939	0.897	0.00373647
pdgy	2.66935e-07	-0.512246	0.03	0.574	0.00375417
CG13364	2.73237e-07	0.722911	0.909	0.985	0.0038428
CG5885	2.7393e-07	0.830216	0.939	0.868	0.00385255
RpS7	2.78774e-07	-0.328517	1	1	0.00392067
CG6966	2.91188e-07	-0.613182	0.212	0.75	0.00409526
Oatp74D	3.04691e-07	-0.547211	0.061	0.618	0.00428518
RpL27	3.12849e-07	-0.397017	1	1	0.0043999
CG31445	3.31779e-07	0.624982	0.394	0.015	0.00466614
Nacalpha	3.37763e-07	-0.397563	0.97	1	0.0047503
CG13937	3.43541e-07	-0.677515	0.273	0.779	0.00483156
mfas	3.67886e-07	-0.717792	0.242	0.706	0.00517395
Fkbp14	3.68698e-07	0.801986	0.818	0.471	0.00518537
Idgf6	4.40952e-07	0.579587	1	1	0.00620155
RpL3	4.57976e-07	-0.334566	1	1	0.00644097
RpS3	5.12939e-07	-0.350792	1	1	0.00721397
DOR	5.38263e-07	-0.779085	0.242	0.721	0.00757013
eIF3l	5.50805e-07	-0.573073	0.545	0.912	0.00774652
lncRNA:CR45660	6.22471e-07	0.340165	0.424	0.029	0.00875443
REPTOR-BP	6.53394e-07	-0.921395	0.485	0.809	0.00918933
RpL29	6.924e-07	-0.511874	0.97	1	0.00973791
PGRP-LC	7.31164e-07	-0.543775	0.152	0.662	0.0102831
CG32276	7.31657e-07	0.703418	0.909	0.985	0.01029
TfIIA-L	7.50231e-07	-0.616024	0.212	0.735	0.0105513
CAP	7.74254e-07	-0.595667	0.091	0.588	0.0108891
CG11267	8.57696e-07	0.797942	0.909	0.912	0.0120626
E23	9.08517e-07	-0.654071	0.242	0.735	0.0127774
Atg8a	9.24064e-07	-0.621783	0.697	0.956	0.012996
CG11300	9.65855e-07	0.410349	0.394	0.029	0.0135838
RpS15Aa	9.66609e-07	-0.384027	1	1	0.0135944
RpL21	1.00286e-06	-0.332836	1	1	0.0141042
et	1.00755e-06	-0.869563	0.394	0.809	0.0141701
pcs	1.0133e-06	-0.555126	0.121	0.603	0.0142511
tai	1.03556e-06	-0.903739	0.606	0.824	0.0145641
RpL19	1.04042e-06	-0.371125	1	1	0.0146324
NimB4	1.06261e-06	0.857253	0.879	0.529	0.0149446
RpL14	1.11963e-06	-0.400233	0.97	1	0.0157465
CG8369	1.18474e-06	-0.679156	0.182	0.676	0.0166621
RpS6	1.24944e-06	-0.416798	1	1	0.0175721
CG6191	1.27859e-06	-0.435644	0.091	0.632	0.0179821
Obp44a	1.36423e-06	-0.789063	0.667	0.912	0.0191865
UbcE2H	1.46419e-06	-0.549392	0.152	0.676	0.0205924
CG9821	1.55337e-06	-0.525658	0.909	1	0.0218466
RpL9	1.5538e-06	-0.381275	0.97	1	0.0218527
CG12576	1.63953e-06	-0.581032	0.303	0.735	0.0230584
CG10576	1.65637e-06	0.592645	0.939	0.897	0.0232951
LanA	3.05558e-09	1.44688	0.909	0.603	4.29736e-05
pyr	1.712e-06	-0.599166	0.121	0.588	0.0240776
Pdk1	1.75245e-06	-0.563836	0.242	0.75	0.0246465
CG30463	1.89808e-06	0.751225	0.758	0.309	0.0266946
jtb	2.04327e-06	0.862332	0.879	0.735	0.0287366
CG13506	2.17777e-06	-0.420975	0.03	0.559	0.0306282
Tig	3.02459e-13	1.47287	0.879	0.176	4.25379e-09
CG5397	2.32507e-06	0.619909	0.394	0.029	0.0326998
Nph	2.45651e-06	0.51729	0.909	0.912	0.0345484
CG9372	2.5897e-06	0.603892	0.636	0.132	0.0364216
tsr	2.7536e-06	0.583521	0.909	1	0.0387266
Fkbp12	2.7536e-06	0.543066	0.909	1	0.0387266
ATPsynC	2.75433e-06	0.327382	1	1	0.0387369
CG13907	2.7723e-06	-0.636761	0.333	0.794	0.0389896
VhaM9.7-b	2.8881e-06	0.594744	0.97	0.897	0.0406183
RpL34b	2.95596e-06	-0.296212	1	1	0.0415726
RpL8	2.95596e-06	-0.339234	1	1	0.0415726
hth	2.96108e-06	-0.750004	0.333	0.721	0.0416446
RpS9	3.06201e-06	-0.380508	1	1	0.0430642
chrb	3.26671e-06	-0.767978	0.455	0.868	0.045943
Ppn	3.56391e-11	1.54959	0.97	0.868	5.01228e-07
roh	3.39806e-06	0.57938	0.97	0.941	0.0477903
Crtc	3.59537e-06	-0.548876	0.273	0.735	0.0505653
chic	3.64677e-06	0.566478	0.939	0.971	0.0512882
dl	3.69695e-06	-0.448394	0	0.471	0.0519939
RpL30	3.77917e-06	-0.49276	1	1	0.0531502
rudhira	3.81836e-06	-0.794961	0.333	0.721	0.0537014
CG45050	3.87233e-06	-0.65522	0.667	0.897	0.0544604
RpL24-like	3.90912e-06	-0.537924	0.727	0.956	0.0549778
CG7120	4.04932e-06	0.427306	0.515	0.088	0.0569496
CG5973	4.13668e-06	0.516373	0.455	0.074	0.0581782
klar	4.18211e-06	-0.730465	0.485	0.853	0.0588172
ash2	4.40681e-06	-0.537143	0.152	0.632	0.0619773
CG12262	4.44721e-06	-0.400921	0.121	0.662	0.0625456
RpS13	4.65582e-06	-0.252256	1	1	0.0654795
RpL18	4.65582e-06	-0.260797	1	1	0.0654795
RpS11	4.65582e-06	-0.295728	1	1	0.0654795
Gal	4.7104e-06	0.377072	0.424	0.044	0.066247
PRAS40	5.18187e-06	-0.619314	0.182	0.647	0.0728778
CG6984	5.27762e-06	-0.305055	0.152	0.676	0.0742245
GlyS	5.86209e-06	-0.494431	0.121	0.603	0.0824444
CG2918	5.92849e-06	0.794974	0.697	0.309	0.0833783
AMPdeam	6.29908e-06	-0.527959	0.273	0.75	0.0885903
Nopp140	6.36758e-06	0.767297	0.727	0.426	0.0895536
scyl	6.51285e-06	-0.653723	0.636	0.941	0.0915967
CG9691	6.56005e-06	-0.3598	0.091	0.588	0.0922606
p23	6.56473e-06	0.513163	0.939	1	0.0923263
Paip2	7.0106e-06	-0.612293	0.303	0.75	0.098597
eEF1gamma	7.02798e-06	-0.334211	1	1	0.0988415
Flo2	7.59849e-06	-0.465448	0.212	0.647	0.106865
px	7.62383e-06	-0.412309	0.182	0.691	0.107222
NHP2	8.09392e-06	0.773657	0.818	0.603	0.113833
l(1)G0320	8.23657e-06	0.836408	0.848	0.868	0.115839
RpS10b	8.32558e-06	-0.289214	1	1	0.117091
Chmp1	8.70818e-06	-0.481683	0.515	0.868	0.122472
CG34132	9.00556e-06	0.817547	0.848	0.75	0.126654
rad50	9.0508e-06	-0.3824	0.061	0.574	0.12729
P32	9.18878e-06	0.711012	0.818	0.647	0.129231
CG5059	9.2387e-06	-0.608481	0.394	0.838	0.129933
PHGPx	9.28431e-06	-0.612128	0.424	0.794	0.130575
CtsB1	9.4578e-06	-0.577673	0.636	0.941	0.133014
Chchd2	9.51479e-06	0.626726	0.879	0.779	0.133816
cu	9.94969e-06	-0.442249	0.182	0.662	0.139932
AGO1	9.98321e-06	-0.606628	0.545	0.868	0.140404
elB	1.00096e-05	-0.644586	0.03	0.471	0.140775
kn	1.04195e-05	-0.873191	0.03	0.471	0.14654
CG42846	1.05702e-05	0.611025	0.576	0.162	0.148659
lin-28	1.11337e-05	-0.62907	0.091	0.559	0.156584
Incenp	1.1213e-05	-0.440388	0.121	0.618	0.1577
CG2991	1.12712e-05	-0.625307	0.212	0.647	0.158518
apt	1.20579e-05	-0.559791	0.152	0.603	0.169582
Hug	1.24317e-05	-0.463743	0.152	0.618	0.17484
CG13551	1.25579e-05	-0.520375	0.606	0.882	0.176614
bigmax	1.26649e-05	-0.513985	0.212	0.662	0.178119
Hsc70-4	1.2858e-05	0.432181	0.97	1	0.180835
CG14523	1.37481e-05	0.789818	0.697	0.206	0.193354
Glt	8.1215e-14	1.73644	1	0.235	1.14221e-09
Scamp	1.41417e-05	0.785965	0.727	0.471	0.198888
CG5953	1.51422e-05	-0.417199	0.121	0.632	0.21296
RpL32	1.51632e-05	-0.35383	1	1	0.213256
sra	1.62942e-05	-0.715511	0.273	0.676	0.229162
RhoGAP68F	1.65296e-05	-0.481125	0.333	0.75	0.232473
schlank	1.67464e-05	0.685543	0.879	0.838	0.235522
Idgf2	1.71692e-05	0.786975	0.939	0.897	0.241467
CG5527	1.72453e-05	0.361492	0.303	0.015	0.242538
RpS25	1.84506e-05	-0.327971	1	1	0.25949
Spase25	1.84657e-05	0.659529	0.818	0.735	0.259702
whd	1.85894e-05	-0.591851	0.212	0.662	0.261441
RpS27A	2.03389e-05	-0.399721	1	1	0.286046
CG33459	2.12223e-05	0.743008	0.667	0.265	0.29847
RpS28b	2.24102e-05	-0.312283	1	1	0.315177
Hsc70-3	2.262e-05	0.92707	0.818	0.647	0.318128
apolpp	0.154506	1.73652	0.182	0.088	1
Eip75B	2.39458e-05	-0.549819	0.576	0.926	0.336774
hdly	2.3962e-05	-0.535092	0.515	0.882	0.337002
CG7872	2.39818e-05	0.696576	0.576	0.191	0.33728
lncRNA:CR44832	2.39827e-05	-0.507035	0.091	0.529	0.337292
RpL38	2.46814e-05	-0.386454	1	1	0.347119
udd	2.47506e-05	-0.475074	0.303	0.706	0.348092
alrm	2.50235e-05	-0.43083	0.273	0.706	0.351931
Ip259	2.54986e-05	-0.509936	0.727	0.956	0.358612
Cat	2.55444e-05	-0.470397	0.152	0.559	0.359257
RpS14b	2.63097e-05	-0.621641	0.939	0.985	0.370019
CG10433	2.87846e-05	-0.451886	0.091	0.529	0.404827
RpS23	2.89605e-05	-0.255403	1	1	0.4073
MFS18	2.99915e-05	0.315409	0.424	0.074	0.4218
CG6767	3.05017e-05	0.58698	0.848	0.721	0.428975
CNBP	3.08622e-05	0.416731	1	0.985	0.434046
RpS30	3.08622e-05	-0.28795	1	1	0.434046
CG15211	3.08823e-05	0.70427	0.848	0.897	0.434329
Pli	3.15964e-05	-0.321959	0.152	0.588	0.444372
Myc	3.19463e-05	-0.621044	0.667	0.882	0.449293
CG7414	3.23989e-05	0.644379	0.848	0.75	0.455658
lok	3.52505e-05	-0.264907	0	0.397	0.495762
jhamt	3.52505e-05	-0.266277	0	0.397	0.495762
msi	3.9594e-05	-0.504508	0.667	0.897	0.55685
Tim17b	4.48193e-05	0.453468	0.879	0.941	0.630339
eIF4H1	4.51902e-05	0.764397	0.879	0.779	0.635555
CG6762	4.60075e-05	-0.36653	0.03	0.456	0.64705
tral	4.61662e-05	-0.468059	0.424	0.824	0.649281
Cyp305a1	4.93885e-05	0.431434	0.273	0.015	0.694601
ATPsynF	4.94078e-05	0.320023	0.939	1	0.694872
RpS15	4.94103e-05	-0.300126	1	1	0.694907
lncRNA:CR42491	5.06224e-05	0.477137	0.424	0.103	0.711954
CG9686	5.09193e-05	-0.645978	0.364	0.706	0.716128
FucTB	5.12293e-05	0.349073	0.364	0.059	0.720488
par-1	5.13582e-05	-0.550902	0.394	0.779	0.722302
Nnf1a	5.17013e-05	-0.353835	0.061	0.456	0.727127
fry	5.19536e-05	-0.343433	0.03	0.426	0.730676
Nop17l	5.22279e-05	-0.331072	0.061	0.5	0.734533
CG1640	5.25757e-05	-0.374986	0.273	0.75	0.739425
ct	5.5411e-05	0.637051	0.818	0.75	0.779301
Hsp60A	5.67798e-05	0.681855	0.818	0.779	0.798551
Rbm13	5.71186e-05	0.793637	0.697	0.382	0.803317
CG17337	5.86861e-05	0.724933	0.758	0.471	0.825361
Frl	5.90107e-05	0.690741	0.848	0.691	0.829926
rdgB	5.9938e-05	-0.341482	0.061	0.456	0.842968
CG1544	6.13345e-05	0.418328	0.333	0.044	0.862609
fend	6.20414e-05	-0.429054	0.152	0.603	0.872551
alphaTub84D	6.24179e-05	0.624431	0.788	0.691	0.877845
CG5590	6.29543e-05	-0.390112	0.333	0.75	0.885389
mge	6.71788e-05	0.580169	0.788	0.647	0.944803
sel	7.08894e-05	0.532691	0.727	0.324	0.996989
Rel	7.25549e-05	-0.487823	0.242	0.618	1
Rheb	7.46995e-05	-0.303592	0.333	0.794	1
CG14701	7.55244e-05	0.378046	0.455	0.118	1
twr	7.68535e-05	0.670688	0.848	0.838	1
dnc	7.70598e-05	-0.555513	0.515	0.809	1
CBP	7.94554e-05	-0.482903	0.485	0.824	1
Cht2	8.16166e-05	0.554842	0.636	0.25	1
CG11857	8.19397e-05	0.81497	0.727	0.485	1
SNF4Agamma	8.19397e-05	-0.58438	0.303	0.691	1
Pgant6	8.22958e-05	0.488435	0.485	0.132	1
wnd	8.22958e-05	-0.290024	0	0.368	1
Vha16-1	8.55501e-05	0.434819	0.939	0.956	1
corto	8.63012e-05	-0.372425	0.061	0.456	1
BtbVII	8.65804e-05	-0.355225	0.182	0.603	1
RpL4	8.8246e-05	-0.258069	0.97	1	1
eater	9.25095e-05	0.531852	0.545	0.191	1
Arf102F	9.35079e-05	0.653363	0.818	0.853	1
RpL6	9.36984e-05	-0.274998	1	1	1
CG2765	9.40546e-05	0.383811	0.485	0.147	1
CG34424	9.48438e-05	-0.304796	0.091	0.5	1
BthD	9.48976e-05	-0.48676	0.182	0.574	1
cic	9.59943e-05	-0.452628	0.303	0.706	1
Lsd-2	9.83548e-05	-0.547735	0.364	0.765	1
lncRNA:CR42868	9.85881e-05	-0.673285	0.424	0.765	1
CG9281	9.89342e-05	0.697773	0.727	0.515	1
COX7C	9.94587e-05	0.37349	0.97	0.971	1
CG3662	0.000100135	-0.458516	0.273	0.662	1
cora	0.000100444	-0.487368	0.333	0.676	1
CG11125	0.000101629	-0.330666	0.03	0.397	1
CG12239	0.000107656	-0.367423	0.152	0.529	1
CG4390	0.000108063	-0.463665	0.485	0.838	1
Act5C	0.000108672	0.523502	0.879	0.985	1
RpS8	0.000108772	-0.272693	1	1	1
Ugalt	0.000110206	0.563669	0.515	0.176	1
p24-1	0.000115118	0.746703	0.697	0.485	1
CG2852	0.000115418	0.341232	1	0.985	1
RpL15	0.000115418	-0.303471	1	1	1
RpS16	0.000115418	-0.304177	1	1	1
Tim8	0.000117739	0.645471	0.788	0.676	1
MFS9	0.000120878	-0.621208	0.333	0.706	1
CG32409	0.000122218	0.691329	0.606	0.294	1
CG4572	0.000123564	-0.408766	0.242	0.632	1
CG43187	0.000124388	-0.309355	0	0.353	1
TfIIA-S	0.000126017	-0.445737	0.545	0.853	1
Vta1	0.000129125	-0.377854	0.242	0.618	1
hrg	0.000129671	-0.419007	0.212	0.588	1
Hsp26	0.000133024	0.740649	0.545	0.191	1
sbb	0.000135169	-0.523565	0.515	0.824	1
kud	0.000137271	0.607363	0.818	0.75	1
CG17734	0.000138937	0.73786	0.727	0.5	1
Prosalpha5	0.000139589	-0.445795	0.606	0.897	1
ncd	0.000139697	-0.311357	0.091	0.485	1
Gale	0.000140318	0.729773	0.848	0.765	1
cpo	0.000141639	-0.488357	0.424	0.765	1
opm	0.000142337	0.392762	0.515	0.162	1
eca	0.000144953	0.39563	0.879	0.912	1
maf-S	0.000150298	-0.365797	0.364	0.721	1
l(2)k09913	0.000154182	-0.414169	0.152	0.515	1
CG6084	0.000156888	0.852848	0.758	0.485	1
14-3-3zeta	0.000164053	0.285039	0.97	1	1
Rap1	0.000164772	0.531801	0.879	0.838	1
Clc	0.000167239	0.514576	0.848	0.765	1
l(2)37Cc	0.000167724	0.451586	0.848	0.824	1
vig	0.000169131	0.549721	0.848	0.706	1
Idgf1	0.000170452	0.563651	0.576	0.191	1
bys	0.000175264	0.552578	0.667	0.338	1
PGRP-LF	0.000175825	-0.276217	0.121	0.529	1
trx	0.000175932	-0.441502	0.273	0.647	1
Ran	0.000177967	0.484898	0.848	0.868	1
CG11377	0.000184145	0.381472	0.515	0.162	1
sty	0.000186153	0.405061	0.909	0.926	1
JhI-26	0.000186703	-0.301881	0	0.338	1
Nrt	0.000189799	-0.463996	0.242	0.603	1
shot	0.000190474	-0.415757	0.394	0.779	1
CG9003	0.000190946	-0.345182	0.091	0.471	1
Bruce	0.000203676	-0.347779	0.061	0.426	1
Adgf-A	0.000204844	-0.374671	0.273	0.647	1
EDTP	0.00020801	-0.351828	0.212	0.588	1
bun	0.000208328	-0.488563	0.667	0.882	1
for	0.000211289	-0.329705	0.091	0.471	1
Arf51F	0.000214282	0.534163	0.758	0.574	1
msb1l	0.000217033	-0.306102	0.121	0.5	1
alc	0.000220631	-0.322185	0.394	0.75	1
olf186-M	0.000222866	-0.569762	0.333	0.721	1
Vha26	0.000222944	0.438599	0.879	0.897	1
CG17896	0.000225415	0.782535	0.848	0.809	1
eEF1beta	0.000231517	-0.250207	1	1	1
Hr4	0.000239882	-0.443061	0.182	0.588	1
stas	0.000249195	0.528016	0.636	0.324	1
CCT5	0.000250117	0.623826	0.818	0.779	1
CG18745	0.000250365	0.33549	0.273	0.029	1
CG12643	0.000261315	-0.413782	0.333	0.75	1
eIF3m	0.00026355	-0.39015	0.758	0.941	1
CG1545	0.000267586	-0.349025	0.061	0.397	1
CG42711	0.000271225	0.670815	0.485	0.132	1
14-3-3epsilon	0.00027425	0.402001	0.939	0.985	1
Rbfox1	0.000275133	-0.486961	0.364	0.691	1
emc	0.000277789	-0.514463	0.455	0.75	1
vkg	1.10747e-13	1.78346	1	0.25	1.55754e-09
SIFa	0.000297413	-0.310934	0.182	0.559	1
His4r	0.00029812	-0.379956	0.879	0.985	1
OstDelta	0.000299684	0.712561	0.788	0.691	1
cer	0.000300712	-0.300845	0.212	0.588	1
CG8839	0.000307431	-0.379423	0.515	0.809	1
CG12159	0.000307917	-0.268799	0.061	0.397	1
lncRNA:roX1	0.000314423	-0.509363	0.818	0.971	1
CG43125	0.000322511	0.267937	0.182	0	1
Nhe2	0.000324949	0.465338	0.424	0.118	1
CG11658	0.000336963	-0.316551	0.03	0.368	1
AnxB9	0.000343653	-0.441407	0.606	0.853	1
Pino	0.000344597	-0.376095	0.152	0.515	1
Ugt35a	0.000379208	-0.3094	0.061	0.397	1
Pink1	0.000380017	-0.303683	0.212	0.544	1
mRpS28	0.000380712	-0.299014	0.364	0.662	1
CG10737	0.000390475	-0.306106	0.152	0.515	1
mio	0.000397788	-0.31131	0.091	0.412	1
mRpL1	0.000401594	-0.319214	0.273	0.662	1
La	0.000408274	0.58662	0.727	0.574	1
CG17593	0.000408611	0.400925	0.576	0.265	1
galectin	0.000415498	-0.304454	0.152	0.515	1
Smyd5	0.000416017	0.551134	0.545	0.265	1
Smr	0.000417227	-0.334093	0.667	0.897	1
CG32369	0.00041847	-0.518244	0.212	0.588	1
Rab18	0.000427295	-0.425632	0.364	0.647	1
RpS12	0.000427354	-0.338593	1	1	1
gce	0.00043702	-0.431186	0.364	0.735	1
Marc	0.000446867	0.326994	0.364	0.074	1
CG31635	0.000450182	-0.373819	0.394	0.765	1
ATP8B	0.000454268	-0.408647	0.485	0.824	1
SNRPG	0.000459856	0.409607	0.879	0.897	1
C1GalTA	0.000469422	0.545684	0.606	0.353	1
KrT95D	0.000471931	-0.310766	0.121	0.456	1
SsRbeta	0.00047468	0.699469	0.758	0.603	1
CG15695	0.000479352	0.40113	0.485	0.176	1
PAN2	0.000481453	-0.264681	0.03	0.368	1
drongo	0.000483257	-0.256943	0.152	0.529	1
eff	0.000487369	0.456153	0.879	0.926	1
CG32486	0.00048802	-0.314421	0.091	0.426	1
CG17508	0.000488797	-0.414513	0.364	0.735	1
COX5A	0.000496076	0.299404	0.909	0.985	1
CG33460	0.000510045	-0.672052	0.424	0.75	1
NtR	0.000510717	0.624198	0.758	0.632	1
CG4658	0.000519436	-0.299267	0.121	0.471	1
kra	0.000526527	0.414203	0.818	0.926	1
Uhg4	0.000530098	0.496039	0.758	0.603	1
Tspo	0.000530646	-0.336075	0.303	0.721	1
CG32278	0.000544131	0.459731	0.697	0.426	1
Roe1	0.000550203	0.670493	0.697	0.456	1
mre11	0.000554819	-0.287311	0.091	0.441	1
cnc	0.000562933	-0.339707	0.273	0.618	1
Flo1	0.000571294	-0.265705	0.394	0.853	1
mew	0.00058276	-0.276934	0.03	0.338	1
Gpo1	0.000582979	0.461873	0.485	0.162	1
RpS19a	0.000591023	-0.290741	1	1	1
Nop56	0.000599939	0.534046	0.788	0.868	1
Phb2	0.00060155	0.505488	0.818	0.824	1
Atet	0.000607275	-0.384127	0.242	0.603	1
TTLL12	0.00061763	-0.306708	0.152	0.485	1
Ten-m	0.000650965	0.515126	0.485	0.176	1
Ostgamma	0.000661288	0.593493	0.818	0.75	1
Smg6	0.000666301	-0.307654	0.121	0.441	1
CG8034	0.000669707	-0.280168	0.182	0.559	1
Hlc	0.000669937	-0.291533	0.303	0.647	1
MFS10	0.000670583	-0.375772	0.273	0.574	1
CG10214	0.000675049	0.496646	0.515	0.221	1
mtSSB	0.000690334	0.38358	0.758	0.5	1
CG33303	0.00069611	0.495929	0.788	0.588	1
EMC3	0.000705926	0.632704	0.667	0.456	1
CG1785	0.000710883	0.549215	0.545	0.25	1
fru	0.000713705	-0.390744	0.364	0.706	1
CG7083	0.00071966	-0.352575	0.091	0.412	1
RpLP2	0.000730748	-0.319257	1	1	1
l(1)G0193	0.000737793	-0.393987	0.152	0.471	1
Manf	0.00073959	0.637445	0.788	0.676	1
RpII18	0.000739609	0.571187	0.758	0.75	1
kibra	0.00074427	-0.274934	0.061	0.382	1
RpS26	0.000750225	-0.363098	1	1	1
CG3792	0.00075247	0.571516	0.606	0.353	1
FoxK	0.000756353	-0.270452	0.121	0.456	1
CG8501	0.000765308	0.83299	0.485	0.162	1
CG4080	0.000766993	-0.328001	0.212	0.574	1
ergic53	0.000769836	0.480653	0.667	0.471	1
Rab2	0.000771438	-0.373605	0.455	0.765	1
lncRNA:roX2	0.000779461	-0.325859	0.424	0.735	1
CG10082	0.000790268	-0.333897	0.273	0.618	1
SrpRbeta	0.000795478	0.527636	0.667	0.382	1
Gel	0.000809186	0.47417	0.848	0.868	1
eIF3a	0.000817434	-0.421652	0.455	0.809	1
CG8602	0.000817556	-0.339488	0.364	0.706	1
Esyt2	0.000823803	-0.410853	0.515	0.838	1
AGO2	0.000840206	-0.270493	0.182	0.515	1
CG8635	0.000843902	-0.366799	0.515	0.868	1
Pcf11	0.000858015	-0.337687	0.212	0.529	1
KdelR	0.000866519	0.730051	0.788	0.912	1
RpL37A	0.000900659	-0.311829	1	1	1
Tom20	0.000923663	0.342546	0.879	0.985	1
ftz-f1	0.000929439	-0.293393	0.091	0.412	1
SpdS	0.000941081	0.723339	0.636	0.412	1
AOX1	0.000941271	-0.273074	0.03	0.324	1
RpS14a	0.000948516	-0.279846	1	1	1
Ski6	0.000949077	0.467437	0.333	0.088	1
PH4alphaEFB	0.000952569	0.602331	0.667	0.441	1
mt:srRNA	0.000986592	-0.341803	0.333	0.721	1
Gmap	0.000988217	-0.311267	0.485	0.824	1
Sr-CI	0.00100192	0.717112	0.727	0.5	1
CG1307	0.00100505	0.534466	0.727	0.574	1
Lk	0.00105766	-0.326235	0.121	0.426	1
mRpL38	0.00108447	-0.290498	0.182	0.5	1
Mes2	0.00109162	-0.384475	0.212	0.544	1
Npc2g	0.00109448	0.46024	0.152	0	1
CG43085	0.00111089	-0.473508	0.273	0.588	1
REPTOR	0.00112311	-0.364922	0.515	0.868	1
E(Pc)	0.00113087	-0.318381	0.273	0.618	1
lncRNA:Hsromega	0.00113386	0.464353	0.939	0.941	1
Irc	0.00114487	-0.418145	0.424	0.691	1
CG7920	0.00114635	-0.314905	0.424	0.721	1
Arf79F	0.00116822	0.419999	0.788	0.926	1
Pis	0.00118778	-0.376085	0.242	0.529	1
lbk	0.00125596	-0.409835	0.455	0.706	1
Vago	0.00129052	-0.38199	0	0.265	1
mthl6	0.00129052	-0.544523	0	0.265	1
Gip	0.00130535	0.290444	0.545	0.25	1
CG16721	0.00130937	-0.261292	0.121	0.426	1
Srp68	0.00131476	-0.275599	0.212	0.529	1
prtp	0.00131814	0.608909	0.758	0.647	1
fat-spondin	0.00132485	0.607344	0.394	0.118	1
CG3505	0.00134063	0.400191	0.697	0.471	1
Spase12	0.00134251	0.481011	0.788	0.868	1
Vps2	0.0013477	-0.348431	0.273	0.559	1
Prosbeta6	0.00136856	-0.324233	0.545	0.882	1
Csl4	0.0013731	0.449898	0.485	0.221	1
Gat	0.00139619	-0.376726	0.303	0.647	1
Rcd2	0.00140566	-0.298239	0.03	0.309	1
CG7630	0.00142492	0.267496	0.97	0.971	1
CG4259	0.00150308	0.58444	0.818	0.853	1
cwo	0.00152414	-0.37688	0.424	0.721	1
Ntf-2	0.00154514	0.500071	0.758	0.676	1
CG9171	0.00155197	0.423259	0.485	0.221	1
CG4364	0.00159636	-0.324485	0.636	0.897	1
ATP6AP2	0.00162513	0.453937	0.788	0.838	1
Prosbeta3	0.00162814	-0.295084	0.576	0.794	1
stg	0.00166734	0.69177	0.697	0.559	1
Snap29	0.00173298	-0.31932	0.091	0.382	1
CG1607	0.00173523	-0.494674	0.242	0.544	1
Spp	0.00173794	0.637738	0.667	0.529	1
CHOp24	0.00175783	0.523349	0.758	0.779	1
CG31778	0.00176495	0.348716	0.333	0.074	1
CG8323	0.00178051	0.303697	0.182	0.015	1
Poc1	0.00183381	-0.287674	0.182	0.471	1
shrb	0.00184614	-0.295898	0.485	0.765	1
Plod	0.00185334	0.820067	0.636	0.412	1
CG9917	0.00185921	0.595774	0.576	0.309	1
mnb	0.00193896	-0.258832	0.242	0.574	1
AdSL	0.00199521	0.62694	0.545	0.294	1
FASN1	0.00202262	0.696886	0.545	0.25	1
mod	0.00204115	0.432606	0.818	0.897	1
Arpc2	0.00204622	0.502272	0.636	0.426	1
nmo	0.0020509	0.576321	0.697	0.485	1
Cam	0.00206246	-0.421967	0.879	0.985	1
Tom40	0.00206784	0.50571	0.667	0.574	1
asrij	0.00207149	-0.286879	0.242	0.559	1
cindr	0.00209075	0.600526	0.697	0.588	1
Tlk	0.0021096	-0.349246	0.485	0.809	1
Bx42	0.00212238	-0.30096	0.273	0.574	1
CG6878	0.00214268	0.532309	0.697	0.662	1
Mbs	0.00219319	-0.283804	0.212	0.515	1
CG4409	0.00222566	-0.275525	0.061	0.338	1
Kaz1-ORFB	0.00223226	0.335121	0.455	0.162	1
ena	0.00225821	0.448368	0.364	0.118	1
Prosbeta4	0.00226627	-0.397669	0.455	0.809	1
CG42815	0.00226802	0.279633	0.242	0.044	1
tna	0.00228167	-0.39946	0.394	0.779	1
LTV1	0.00230679	-0.339069	0.515	0.75	1
CG17544	0.00230868	-0.369871	0.333	0.647	1
Act57B	0.00234747	-0.275747	0.091	0.368	1
Hex-A	0.00235532	-0.403723	0.515	0.794	1
CG12384	0.00236317	-0.366967	0.697	0.868	1
Orct2	0.00237708	0.272861	0.333	0.088	1
HmgZ	0.0023855	-0.411004	0.939	0.985	1
CG5390	0.00243359	-0.30685	0.364	0.662	1
l(3)L1231	0.00248156	-0.258804	0.273	0.574	1
yellow-f	0.00248199	0.295024	0.212	0.029	1
vib	0.0025169	0.415815	0.727	0.618	1
Hsc70Cb	0.0025205	0.503846	0.606	0.368	1
Rpn6	0.00252923	0.545696	0.667	0.471	1
MESK2	0.00253167	-0.527071	0.333	0.603	1
CG42389	0.00255333	-0.365001	0.545	0.853	1
eIF3i	0.00255462	-0.267518	0.788	0.971	1
Nipped-B	0.00255964	-0.265707	0.485	0.868	1
mura	0.00257481	-0.2707	0.152	0.441	1
CG34232	0.00260495	0.510023	0.212	0.029	1
Nmdmc	0.00262143	0.383371	0.636	0.382	1
CG3348	0.0027075	0.801323	0.242	0.044	1
CG32816	0.0027075	0.369036	0.242	0.044	1
CG43236	0.00273345	0.404736	0.212	0.029	1
VhaAC45	0.00276512	0.424858	0.818	0.853	1
CG3164	0.00279635	-0.380039	0.333	0.632	1
Ilp4	0.00300797	0.250892	0.212	0.029	1
Sec61alpha	0.00301991	0.500867	0.788	0.809	1
Mtpalpha	0.00308219	-0.306777	0.242	0.515	1
CG5830	0.00309815	-0.271521	0.242	0.574	1
Reg-5	0.0031956	-0.278296	0.182	0.515	1
eIF3c	0.00323566	-0.325119	0.636	0.912	1
ctp	0.0033595	0.39506	0.97	0.926	1
CG14818	0.00337548	-0.324863	0.333	0.618	1
eIF5B	0.0033971	0.526081	0.758	0.574	1
CG18731	0.00342996	-0.255295	0.121	0.382	1
CG7324	0.00348652	-0.254608	0.152	0.426	1
GstD7	0.00351322	0.552075	0.424	0.191	1
tank	0.00352138	-0.290163	0.182	0.456	1
Thiolase	0.00354397	-0.350909	0.424	0.662	1
ref(2)P	0.0036008	-0.25269	0.242	0.515	1
CG6523	0.0036712	-0.257804	0.455	0.765	1
ATPsynCF6	0.00368994	0.252749	0.97	0.985	1
mt:CoIII	0.00390905	-0.404812	1	1	1
Hydr2	0.00394	-0.283974	0.303	0.574	1
Xrp1	0.00403474	-0.404189	0.667	0.897	1
mt:ND2	0.00411973	-0.389897	0.545	0.794	1
CG34449	0.00418956	-0.347912	0.424	0.662	1
CG18081	0.0042314	0.53534	0.727	0.809	1
Zip99C	0.00445804	-0.284095	0.152	0.426	1
Sodh-2	0.00455514	-0.307235	0.667	0.882	1
mRpL12	0.00458289	0.414963	0.727	0.632	1
Pabp2	0.00458732	0.415866	0.606	0.382	1
Ufm1	0.00459068	0.496271	0.697	0.618	1
Ars2	0.00462174	-0.273655	0.273	0.588	1
CCT3	0.00474302	0.368642	0.818	0.882	1
GstO3	0.00483109	-0.297605	0.212	0.544	1
CG9107	0.00489467	0.385263	0.576	0.324	1
TM9SF2	0.00493638	0.46081	0.758	0.809	1
Smox	0.00497462	-0.338688	0.333	0.618	1
Sf3b2	0.00504438	-0.254079	0.303	0.588	1
Rsf1	0.00516708	-0.306675	0.303	0.588	1
Ubi-p5E	0.00520441	-0.322572	0.273	0.515	1
HSPC300	0.00521659	0.493994	0.636	0.471	1
SerRS	0.00525846	0.509056	0.667	0.471	1
Rcd5	0.00533452	-0.293619	0.242	0.529	1
Pfdn2	0.00533524	0.518439	0.788	0.824	1
CTPsyn	0.0054206	0.356053	0.636	0.426	1
mRpS35	0.00552369	0.281266	0.424	0.176	1
Mybbp1A	0.00553693	0.291592	0.303	0.088	1
Vti1b	0.0055742	-0.288668	0.364	0.647	1
Ubi-p63E	0.00563651	-0.256915	0.424	0.721	1
l(2)37Cg	0.00574267	0.544763	0.576	0.368	1
zfh1	0.00578987	-0.416986	0.545	0.75	1
mt:lrRNA	0.00586783	-0.533018	1	1	1
CG10420	0.00594788	0.310724	0.394	0.162	1
sima	0.00600318	-0.271245	0.394	0.706	1
PNUTS	0.00603329	-0.253827	0.333	0.588	1
mxt	0.00611507	-0.278913	0.152	0.397	1
Surf4	0.00620694	0.372968	0.727	0.809	1
cv-2	0.00624407	-0.32188	0.242	0.544	1
Fer1HCH	0.00633685	-0.302794	0.909	0.985	1
Dsp1	0.00640453	-0.29459	0.515	0.824	1
dnk	0.00658746	0.371208	0.545	0.309	1
PSR	0.00660633	-0.290837	0.273	0.544	1
Nup62	0.00663144	-0.250204	0.273	0.529	1
CG7637	0.00670213	0.615736	0.727	0.838	1
gb	0.0067955	-0.310617	0.242	0.5	1
Gnpnat	0.00703849	0.288654	0.364	0.132	1
CG1371	0.0071686	0.355766	0.485	0.265	1
kdn	0.00717955	0.42368	0.455	0.265	1
CG8939	0.00719826	0.314803	0.515	0.294	1
Sem1	0.00721611	0.540911	0.758	0.721	1
Cyp28a5	0.00722198	-0.259988	0.273	0.559	1
wdb	0.00733345	-0.288181	0.455	0.691	1
CG10166	0.00739385	0.461644	0.576	0.412	1
Csk	0.00743893	-0.266294	0.242	0.559	1
P58IPK	0.00748014	0.395771	0.424	0.221	1
bbc	0.00749677	0.444185	0.576	0.353	1
cv-c	0.00756937	-0.295046	0.273	0.559	1
Jafrac2	0.00765853	0.626667	0.606	0.397	1
CG11137	0.0077061	0.578012	0.697	0.544	1
CG1552	0.00777443	-0.28781	0.091	0.324	1
l(1)10Bb	0.00798616	0.503289	0.545	0.324	1
lark	0.00805633	-0.302487	0.424	0.676	1
CG6937	0.00815454	0.411379	0.515	0.294	1
D1	0.00823612	-0.339826	0.515	0.75	1
rdx	0.00836445	-0.300729	0.273	0.544	1
srp	0.00856707	-0.313214	0.394	0.618	1
Crz	0.00866451	0.505987	0.515	0.309	1
ras	0.00870782	0.560565	0.697	0.676	1
CG14210	0.0089958	0.398824	0.667	0.559	1
CalpB	0.00902786	0.30434	0.424	0.206	1
PCNA	0.00927472	0.510405	0.636	0.471	1
Elp3	0.00942749	0.292342	0.333	0.132	1
CG8668	0.00955636	0.489422	0.636	0.441	1
CG3760	0.00980165	0.383183	0.727	0.691	1
r-l	0.00988516	0.337663	0.485	0.25	1
NimB5	0.0101385	0.251016	0.848	0.956	1
spin	0.0102156	0.396036	0.485	0.265	1
CG9286	0.0102853	0.334243	0.455	0.25	1
Sap-r	0.0103848	-0.26578	0.455	0.75	1
CG12025	0.0103937	-0.277275	0.182	0.397	1
THG	0.0106484	0.307912	0.333	0.118	1
Syx6	0.0106694	0.459781	0.364	0.162	1
Nlp	0.0107	0.280036	0.939	1	1
Sec61gamma	0.0107724	0.692884	0.697	0.779	1
UQCR-Q	0.0109238	0.322047	0.909	1	1
CG5888	0.0110491	0.502959	0.485	0.279	1
cact	0.0113739	-0.31323	0.152	0.397	1
CG42342	0.0114174	-0.316842	0.242	0.471	1
CG5323	0.0114491	0.41545	0.545	0.353	1
mRpS10	0.0114985	0.478587	0.606	0.471	1
TORIP	0.0115641	-0.250109	0.212	0.456	1
CG12288	0.0116104	0.319894	0.364	0.162	1
Hsc70-5	0.0116833	0.418409	0.606	0.529	1
CG31460	0.0117174	0.391023	0.424	0.221	1
AP-1sigma	0.0118204	0.428489	0.636	0.471	1
CG15168	0.0118301	0.377852	0.576	0.456	1
CG10077	0.0118455	-0.264716	0.545	0.779	1
Uggt	0.011857	0.403304	0.333	0.147	1
CG17278	0.0119375	0.600166	0.667	0.5	1
Pomp	0.0119534	0.345692	0.758	0.75	1
Akap200	0.0121666	-0.290358	0.455	0.662	1
CG10512	0.0122945	-0.281203	0.485	0.735	1
sd	0.0125299	-0.259031	0.242	0.471	1
Gs1l	0.0126524	0.486004	0.697	0.559	1
JhI-21	0.0127751	0.392445	0.485	0.279	1
U2A	0.013046	0.349147	0.424	0.206	1
CG7220	0.0131407	-0.320386	0.485	0.676	1
CHES-1-like	0.0135393	-0.275205	0.242	0.456	1
CG11444	0.0135512	0.43914	0.636	0.559	1
fne	0.0135687	-0.449824	0.394	0.632	1
His2Av	0.0136611	0.277516	0.879	0.941	1
bmm	0.0141228	-0.288272	0.303	0.559	1
Arp3	0.0143745	0.412512	0.545	0.353	1
CG10359	0.0146687	0.49125	0.273	0.088	1
CG10038	0.0146806	-0.506956	0.091	0.309	1
Psc	0.0153268	-0.272992	0.152	0.382	1
Col4a1	8.42876e-15	1.84474	1	0.25	1.18542e-10
CG5044	0.0153971	-0.258266	0.303	0.544	1
CG8320	0.0160483	0.402204	0.636	0.515	1
RpLP0-like	0.0161885	0.362089	0.697	0.618	1
Bsg	0.0163955	0.341859	0.788	0.765	1
CG32576	0.0164744	0.435289	0.485	0.309	1
Eno	0.0166186	0.272548	0.818	0.912	1
Pdha	0.0169064	0.35333	0.636	0.588	1
Naa20A	0.0170443	0.270671	0.364	0.162	1
Tet	0.0171542	-0.279514	0.212	0.412	1
Sod1	0.0173287	0.265445	0.788	0.868	1
bel	0.017481	0.456217	0.667	0.809	1
CG9849	0.0176226	0.466312	0.333	0.147	1
bor	0.0177576	0.273724	0.455	0.221	1
CG12107	0.017762	0.403554	0.455	0.279	1
Fkbp59	0.0177946	0.384974	0.667	0.662	1
CG14184	0.0179403	-0.251479	0.273	0.485	1
Hsp68	0.0181201	0.352702	0.212	0.059	1
Cchl	0.0181645	0.547595	0.727	0.676	1
r2d2	0.0184642	0.330242	0.364	0.162	1
Spn27A	0.0185277	0.396914	0.727	0.676	1
mRpS33	0.0185526	0.482018	0.545	0.382	1
Ahcy	0.0187272	0.415709	0.758	0.765	1
Cyp6v1	0.0194164	0.336809	0.545	0.338	1
Pits	0.0196643	-0.2652	0.606	0.838	1
CG13315	0.0199074	0.367796	0.303	0.118	1
CG34163	0.0203065	0.37743	0.606	0.397	1
jim	0.020952	-0.260992	0.242	0.441	1
MFS14	0.0213355	0.434557	0.333	0.147	1
Jupiter	0.0216031	-0.257394	0.606	0.765	1
Rip11	0.0217644	0.605919	0.606	0.5	1
CG9922	0.0221107	0.376262	0.667	0.676	1
hoe1	0.022276	0.268972	0.182	0.044	1
CG11779	0.0222921	0.460779	0.455	0.25	1
CG1703	0.0222921	0.420146	0.455	0.25	1
AsnRS	0.0223878	0.304814	0.606	0.485	1
ida	0.0227466	0.251114	0.152	0.029	1
sun	0.0228779	0.310999	0.848	0.897	1
CG2453	0.0229768	0.263467	0.303	0.118	1
Acph-1	0.0230838	0.335527	0.424	0.235	1
CG6650	0.0244508	0.336016	0.273	0.103	1
CG5599	0.0247581	0.263415	0.424	0.235	1
rogdi	0.0247737	0.294983	0.394	0.206	1
Baldspot	0.0248665	0.336644	0.636	0.559	1
CG5903	0.0248731	0.252817	0.848	0.882	1
x16	0.0253758	0.382924	0.515	0.353	1
CrebA	0.0254281	0.490503	0.606	0.471	1
GstT3	0.0257119	0.350552	0.333	0.147	1
Ets21C	0.0261636	0.282045	0.242	0.088	1
SERCA	0.0265602	0.334045	0.606	0.382	1
Pym	0.0266028	0.334714	0.364	0.191	1
Vha13	0.0269559	0.336184	0.909	0.971	1
CG6287	0.0278304	-0.263681	0.03	0.191	1
RFeSP	0.0278511	0.307189	0.818	0.912	1
pirk	0.0279484	-0.27669	0.121	0.353	1
LSm3	0.0280654	0.439126	0.576	0.485	1
mRpL30	0.0280833	0.448566	0.636	0.529	1
Rdl	0.0282582	-0.428219	0.364	0.574	1
CG5114	0.0290362	0.390724	0.485	0.279	1
Pdf	0.0292624	0.312968	0.303	0.147	1
CG9302	0.0293517	0.327305	0.455	0.294	1
lncRNA:CR43264	0.0295879	0.496778	0.242	0.088	1
CG33129	0.029725	0.511061	0.667	0.75	1
CG10470	0.0299499	0.409683	0.697	0.632	1
CG2862	0.0300628	0.3645	0.788	0.868	1
Cnx99A	0.0306431	0.441964	0.455	0.294	1
Rab1	0.0306731	-0.296226	0.667	0.882	1
nSyb	0.0308214	-0.375461	0.333	0.529	1
CG11089	0.0308854	0.253377	0.455	0.265	1
GlcAT-P	0.0316588	0.492938	0.727	0.662	1
lncRNA:CR34335	0.032385	-0.673198	0.939	1	1
Antp	0.0324029	-0.603282	0.03	0.191	1
SmD1	0.0326146	0.377619	0.636	0.544	1
ghi	0.0326655	0.580495	0.758	0.735	1
ND-B16.6	0.0326904	0.318841	0.818	0.868	1
SmF	0.0327048	0.489664	0.667	0.603	1
Rpb10	0.0336564	0.497982	0.697	0.706	1
nudC	0.034087	0.328112	0.515	0.382	1
CG7638	0.0342187	0.312698	0.515	0.309	1
gpp	0.0343073	0.385128	0.606	0.456	1
LpR2	0.0345607	-0.432864	0.273	0.471	1
Hat1	0.0347927	0.291349	0.424	0.279	1
Idgf3	0.0353079	0.345149	0.758	0.868	1
GILT2	0.0354999	-0.276312	0.121	0.309	1
TM9SF4	0.0356416	0.328573	0.424	0.25	1
CG30283	0.035699	0.401546	0.758	0.882	1
CG5033	0.0363678	0.272531	0.424	0.235	1
Obp99a	0.0379767	-0.348161	0.545	0.75	1
CG15717	0.0380669	0.338695	0.636	0.515	1
Snx3	0.0384012	0.372567	0.545	0.441	1
CG9547	0.0387766	0.415993	0.636	0.515	1
CG3756	0.0388377	0.320048	0.424	0.235	1
lace	0.0397182	0.269855	0.424	0.25	1
Catsup	0.041101	0.326462	0.606	0.471	1
ZnT63C	0.041773	0.399701	0.333	0.176	1
Rrp40	0.0418911	0.4085	0.545	0.368	1
spidey	0.0428707	0.640569	0.636	0.603	1
CG34200	0.043035	0.413957	0.727	0.809	1
CG30499	0.0430906	0.482403	0.667	0.647	1
CG7737	0.0434986	0.255209	0.242	0.088	1
St3	0.0440904	0.34076	0.242	0.103	1
CG4593	0.0450038	0.35602	0.424	0.265	1
CG1418	0.0456592	0.425522	0.485	0.338	1
CG15814	0.045672	0.36993	0.515	0.382	1
CG11583	0.0459571	0.482052	0.606	0.544	1
ReepB	0.0466766	0.384017	0.758	0.941	1
clu	0.0467602	0.383788	0.515	0.338	1
NimC1	0.0471852	0.275037	0.394	0.206	1
CG43658	0.0474534	0.352004	0.303	0.147	1
Edem2	0.0474534	0.251158	0.303	0.147	1
CG1416	0.0476286	0.256661	0.606	0.544	1
VhaPPA1-1	0.0479813	0.459553	0.697	0.809	1
CG3408	0.0492511	0.325642	0.242	0.103	1
UQCR-11	0.0515704	0.341939	0.818	0.882	1
eIF2alpha	0.0515704	-0.269819	0.697	0.941	1
CG13631	0.0515832	0.332266	0.667	0.544	1
ACC	0.0525401	0.266622	0.273	0.118	1
CG33494	0.053178	-0.305527	0.697	0.912	1
ATPsynB	0.0545161	0.258856	0.879	0.956	1
CG4045	0.0548178	0.306332	0.606	0.5	1
CG4619	0.0549095	0.251573	0.242	0.103	1
pan	0.0557888	-0.251389	0.424	0.588	1
CG6126	0.0559111	0.480065	0.545	0.5	1
CG34195	0.0564058	0.299619	0.242	0.103	1
Ost48	0.0574654	0.36786	0.758	0.838	1
Hrb27C	0.0582742	0.286173	0.818	1	1
Xbp1	0.0586652	0.423491	0.758	0.868	1
mRpS7	0.0586913	0.433161	0.576	0.426	1
Uhg3	0.0588173	0.297914	0.455	0.309	1
SmD3	0.0593353	0.296925	0.727	0.691	1
Rpb8	0.0599593	0.462879	0.545	0.471	1
CG5589	0.060357	0.370442	0.303	0.147	1
CG16743	0.061794	0.520746	0.303	0.147	1
Stip1	0.061939	0.322128	0.515	0.397	1
CG17271	0.0622975	0.519756	0.606	0.515	1
CG3071	0.0629194	0.329953	0.394	0.25	1
GCS2beta	0.0633733	0.33841	0.606	0.515	1
mRpL13	0.0639871	0.377242	0.545	0.397	1
Tgi	0.0642076	-0.258639	0.394	0.588	1
CG12163	0.0650072	-0.558984	0.515	0.691	1
mRpL17	0.0665652	0.295585	0.485	0.324	1
Pisd	0.0673291	0.279488	0.606	0.544	1
CG8460	0.0684612	0.312243	0.364	0.221	1
nrv1	0.0686873	0.295618	0.545	0.397	1
Surf6	0.0689474	0.398116	0.515	0.397	1
CG2972	0.0690705	0.28572	0.455	0.338	1
CG11563	0.0699526	0.445033	0.545	0.441	1
CG14229	0.0701275	0.324074	0.455	0.265	1
CG18508	0.0719017	0.258648	0.394	0.235	1
Mvl	0.0720427	0.392696	0.545	0.412	1
CG31650	0.0723322	0.377902	0.394	0.25	1
CG4511	0.0726886	0.256036	0.545	0.382	1
ThrRS	0.0735082	0.314807	0.636	0.618	1
l(2)09851	0.0735551	0.431153	0.424	0.279	1
loj	0.0737592	0.298071	0.455	0.309	1
Mcm6	0.0751333	0.305496	0.455	0.309	1
Sec24CD	0.075224	0.464545	0.394	0.25	1
CG33052	0.0756097	0.334748	0.515	0.412	1
AIMP1	0.0758577	0.346056	0.606	0.5	1
koi	0.0774698	-0.261524	0.394	0.574	1
Jwa	0.0779504	0.386288	0.758	0.824	1
Clbn	0.0782397	0.268303	0.333	0.191	1
mRpL20	0.0785877	0.28842	0.364	0.25	1
Top1	0.078616	0.275685	0.576	0.5	1
NaCP60E	0.0788817	0.436582	0.333	0.221	1
Rpb12	0.0801679	0.317285	0.667	0.662	1
CG12730	0.0812907	0.278643	0.394	0.25	1
alpha-Est9	0.0815807	0.399909	0.333	0.191	1
EMC1	0.0818747	0.254815	0.636	0.559	1
mst	0.082011	0.278062	0.364	0.235	1
CG17660	0.0827785	0.405326	0.545	0.5	1
velo	0.0829521	0.313309	0.424	0.294	1
CG32441	0.0840663	0.282046	0.667	0.662	1
LPCAT	0.0841356	0.27169	0.182	0.074	1
CG7519	0.0843281	0.41057	0.515	0.456	1
pit	0.0843727	0.371876	0.576	0.441	1
Shmt	0.0844762	0.44942	0.576	0.544	1
RPA3	0.0847739	0.319183	0.606	0.544	1
CG2846	0.0850923	0.396379	0.455	0.353	1
VhaAC39-1	0.0853994	0.253553	0.667	0.662	1
Swip-1	0.085459	0.361691	0.636	0.529	1
CG42239	0.0857457	0.318582	0.545	0.441	1
Sec22	0.0860524	0.315163	0.424	0.294	1
bcn92	0.0864971	0.283073	0.545	0.456	1
mRpL54	0.0872442	-0.263154	0.424	0.618	1
RpI12	0.0873161	0.256198	0.455	0.294	1
ND-ACP	0.0874097	0.291495	0.909	0.926	1
Nmd3	0.0877487	0.345111	0.394	0.25	1
CG31637	0.0879146	0.251152	0.394	0.265	1
Cypl	0.0889053	0.292512	0.455	0.294	1
CG9143	0.0902961	0.279897	0.273	0.147	1
CG1542	0.0933972	0.277052	0.485	0.368	1
CG3702	0.0937416	0.290654	0.576	0.515	1
lncRNA:CR43283	0.0939612	0.682633	0.273	0.515	1
Vha14-1	0.094336	0.336821	0.758	0.868	1
l(3)02640	0.0946515	0.293074	0.424	0.309	1
PIG-O	0.0950504	0.281385	0.212	0.103	1
Tango5	0.0964771	0.274898	0.394	0.265	1
Mys45A	0.0976474	0.406638	0.424	0.294	1
Alg11	0.0980432	0.354969	0.606	0.559	1
CaBP1	0.0984478	0.457443	0.667	0.735	1
CG9515	0.0990691	0.298259	0.303	0.176	1
Taf13	0.0996909	0.498064	0.667	0.662	1
mRpL21	0.100161	0.314195	0.485	0.353	1
tko	0.101373	0.319892	0.667	0.647	1
CG7394	0.101788	0.325181	0.545	0.426	1
Syx16	0.101855	0.295859	0.424	0.324	1
eIF3j	0.102266	0.258632	0.636	0.647	1
ksh	0.102386	0.434206	0.576	0.647	1
CG6724	0.103797	0.289063	0.394	0.265	1
CG32066	0.104185	0.253764	0.576	0.397	1
CG11076	0.105802	0.265001	0.576	0.456	1
egh	0.106716	0.341845	0.697	0.647	1
CG8611	0.106961	0.401451	0.242	0.118	1
Spn28Dc	0.109765	0.257648	0.303	0.176	1
mRpS21	0.110419	0.369115	0.576	0.485	1
borr	0.110477	0.273702	0.333	0.191	1
CG12811	0.111101	0.366055	0.545	0.412	1
Nup107	0.111551	0.30645	0.394	0.265	1
lncRNA:CR40469	0.112608	-0.344423	0.455	0.632	1
nclb	0.112894	0.272618	0.606	0.588	1
CG1628	0.112921	0.398004	0.515	0.456	1
CG5969	0.113632	0.444648	0.576	0.588	1
Npc2a	0.117307	0.344393	0.667	0.676	1
Dp1	0.119432	0.308354	0.667	0.735	1
CG14721	0.11976	0.337226	0.273	0.147	1
Kr-h2	0.119799	0.352775	0.636	0.632	1
CG9911	0.120211	0.354121	0.485	0.471	1
luna	0.120249	0.274188	0.545	0.412	1
CG31705	0.120696	0.26118	0.636	0.471	1
CG4866	0.12101	0.259155	0.606	0.426	1
deltaCOP	0.121734	0.28208	0.545	0.471	1
CG14806	0.123199	0.449814	0.485	0.382	1
Spase22-23	0.126549	0.455036	0.667	0.735	1
zip	0.128667	0.256114	0.545	0.5	1
CG18178	0.129124	0.371906	0.424	0.324	1
CG7484	0.130951	0.390568	0.606	0.588	1
Fib	0.132797	0.282266	0.879	0.912	1
Ibf2	0.13323	0.320531	0.424	0.294	1
Gpdh1	0.136305	0.393277	0.394	0.294	1
kuz	0.138809	0.255735	0.697	0.647	1
Arl4	0.139089	0.275997	0.515	0.5	1
CG40160	0.140922	0.2554	0.273	0.162	1
Gadd45	0.144485	0.422835	0.424	0.279	1
mRpS14	0.146674	0.487002	0.515	0.441	1
Rpt6	0.148617	0.308898	0.545	0.485	1
Dcr-2	0.15081	0.311553	0.182	0.088	1
mRpL52	0.151356	0.313955	0.576	0.485	1
Prx3	0.152245	0.332897	0.576	0.515	1
Argk	0.152583	0.363137	0.606	0.515	1
CG17219	0.154426	0.27661	0.273	0.176	1
Pxn	1.11901e-13	1.86019	0.97	0.221	1.57378e-09
CG14434	0.156165	0.373848	0.545	0.456	1
flr	0.156447	0.374022	0.485	0.368	1
Dak1	0.157177	0.262967	0.697	0.75	1
mRpL33	0.159749	0.302127	0.576	0.632	1
trv	0.161469	-0.410897	0.152	0.294	1
CG4972	0.165234	0.305955	0.515	0.426	1
CG15922	0.166882	0.265134	0.455	0.309	1
mRpS18C	0.169492	0.322165	0.424	0.324	1
wge	0.169841	0.35932	0.515	0.441	1
Hsp23	0.169961	0.504911	0.455	0.382	1
ND-B22	0.171766	0.388793	0.727	0.838	1
Ykt6	0.174324	0.261288	0.424	0.338	1
norpA	0.17626	0.252804	0.333	0.206	1
CG31937	0.177692	0.31066	0.455	0.382	1
Inos	0.178786	0.335867	0.333	0.25	1
HipHop	0.179587	0.265286	0.394	0.294	1
Spt-I	0.180639	0.257997	0.424	0.309	1
tth	0.181975	0.305683	0.515	0.456	1
CG12128	0.183717	0.256446	0.424	0.294	1
Uch-L5	0.188002	0.267359	0.424	0.338	1
CG6769	0.188749	0.290365	0.576	0.5	1
Srp14	0.189999	0.274489	0.636	0.632	1
PGAP5	0.191463	0.284049	0.152	0.074	1
Tim23	0.195387	0.335208	0.606	0.632	1
ATPCL	0.199395	0.30025	0.455	0.368	1
chn	0.201331	0.441365	0.394	0.309	1
Atox1	0.202725	0.273576	0.576	0.559	1
lwr	0.203725	0.313059	0.697	0.809	1
CG11790	0.203842	0.453391	0.545	0.544	1
Gfat2	0.207297	0.31102	0.606	0.676	1
Acon	0.21029	0.324753	0.515	0.485	1
Ref1	0.210457	0.261215	0.576	0.618	1
Rtnl1	0.210753	0.274113	0.879	0.824	1
bif	0.213127	0.322559	0.515	0.485	1
LKRSDH	0.214572	0.255737	0.364	0.279	1
Pat1	0.215435	0.252981	0.424	0.368	1
Ms	0.216337	0.303522	0.606	0.647	1
Brms1	0.220145	0.251676	0.394	0.309	1
Capa	0.220701	-0.782254	0.091	0.191	1
Trl	0.221203	0.314468	0.303	0.221	1
Eip55E	0.221906	0.30841	0.606	0.647	1
ATPsynO	0.222148	0.253558	0.818	0.926	1
Npc2h	0.222669	0.369815	0.182	0.103	1
Pdp1	0.223462	0.322359	0.667	0.809	1
Tim9a	0.224728	0.41233	0.636	0.632	1
CG1358	0.225025	0.3766	0.212	0.132	1
rept	0.225614	0.297711	0.394	0.294	1
Yeti	0.226667	0.294075	0.758	0.853	1
robl	0.229705	0.250635	0.515	0.5	1
CG33774	0.236127	0.280622	0.606	0.721	1
l(2)SH0834	0.237648	0.29634	0.576	0.485	1
Pde6	0.239054	0.480647	0.455	0.397	1
CG3625	0.23925	0.319835	0.455	0.382	1
CG10674	0.239697	0.263221	0.606	0.632	1
ND-B17.2	0.241587	0.270232	0.727	0.765	1
eIF4G1	0.24421	0.269943	0.667	0.838	1
UGP	0.244322	0.305879	0.485	0.456	1
UQCR-C2	0.246799	0.456014	0.758	0.853	1
Got2	0.247473	0.266705	0.576	0.544	1
viaf	0.251361	0.256489	0.515	0.5	1
POLDIP2	0.253145	0.282397	0.364	0.265	1
CG32069	0.253728	0.327024	0.545	0.559	1
CG34117	0.262331	0.409763	0.515	0.485	1
CG10165	0.262826	0.26323	0.333	0.265	1
U2af38	0.268865	0.306633	0.394	0.309	1
PCB	0.27062	0.683512	0.242	0.147	1
Dph5	0.273744	0.348054	0.606	0.706	1
MED22	0.284862	0.261804	0.455	0.353	1
CG42668	0.286695	0.265264	0.576	0.618	1
Stt3B	0.289313	0.382137	0.606	0.721	1
msk	0.293513	0.503514	0.576	0.618	1
cpa	0.294647	0.251324	0.515	0.471	1
Taldo	0.294691	0.250452	0.455	0.397	1
CG31145	0.295907	0.257856	0.182	0.103	1
Mip	0.302564	-0.269934	0.061	0.132	1
CG10483	0.302761	0.317158	0.182	0.118	1
CG11357	0.303167	0.494496	0.545	0.603	1
rin	0.307799	0.379116	0.667	0.765	1
Pfdn5	0.309523	0.295355	0.636	0.735	1
Tudor-SN	0.310151	0.379689	0.606	0.765	1
alpha-Man-IIa	0.31208	0.356378	0.152	0.088	1
Art1	0.314312	0.275917	0.576	0.574	1
CG13220	0.314397	0.424965	0.576	0.721	1
Sc2	0.317171	0.385023	0.515	0.5	1
Rpi	0.31719	0.287518	0.636	0.75	1
Nup188	0.320042	0.269619	0.182	0.118	1
Dhfr	0.321989	0.311865	0.333	0.279	1
Sec13	0.324112	0.265157	0.667	0.691	1
rad	0.333119	0.276507	0.394	0.324	1
l(2)tid	0.33356	0.401866	0.424	0.412	1
Lamp1	0.334901	0.256323	0.788	0.897	1
CG32687	0.336451	0.250507	0.273	0.206	1
CG4743	0.337956	0.28116	0.182	0.118	1
mRpL16	0.338096	0.296766	0.455	0.441	1
prage	0.338902	0.257064	0.303	0.235	1
Qsox1	0.341049	0.340732	0.242	0.176	1
Der-1	0.351934	0.269119	0.545	0.588	1
Pcd	0.351972	0.294087	0.515	0.5	1
VhaM9.7-a	0.353276	0.314681	0.485	0.456	1
lili	0.35337	0.258523	0.303	0.235	1
Phf5a	0.354376	0.389181	0.455	0.441	1
CG9422	0.357429	0.325924	0.303	0.25	1
Dad1	0.365303	0.272088	0.788	0.985	1
CG6712	0.374202	0.275655	0.455	0.412	1
CG15093	0.374308	0.34175	0.788	0.882	1
Bet1	0.380722	0.361721	0.424	0.426	1
Mob2	0.382578	0.255979	0.576	0.559	1
tsu	0.3898	0.279743	0.636	0.765	1
NAT1	0.391397	0.276006	0.485	0.485	1
ND-13A	0.395872	0.287593	0.606	0.691	1
CG5287	0.395927	0.347137	0.303	0.265	1
cv-d	0.406306	0.256623	0.545	0.559	1
Prip	0.410038	0.328521	0.515	0.529	1
O-fut1	0.414587	0.284275	0.364	0.353	1
Hrb98DE	0.414932	0.27264	0.545	0.559	1
CG8397	0.415109	0.297492	0.545	0.632	1
mys	0.416146	0.255373	0.364	0.324	1
fog	0.422328	0.307735	0.485	0.456	1
RtcB	0.437936	0.250089	0.333	0.294	1
wcd	0.457944	0.283211	0.273	0.221	1
Rpn12	0.479244	0.311843	0.424	0.456	1
CG8010	0.481742	0.271345	0.394	0.324	1
Ugt58Fa	0.494252	0.262431	0.424	0.426	1
CG9586	0.495121	0.342571	0.364	0.338	1
CG5862	0.496138	0.428645	0.364	0.353	1
AspRS	0.497883	0.280195	0.667	0.735	1
mRpS34	0.504407	0.296078	0.424	0.412	1
mRpL11	0.504407	0.286089	0.455	0.397	1
Rpn1	0.506839	0.366058	0.394	0.412	1
GramD1B	0.519794	0.252091	0.182	0.147	1
CG4293	0.526017	0.253065	0.364	0.309	1
CG15771	0.531576	0.273447	0.303	0.279	1
Rac1	0.543278	0.400985	0.606	0.618	1
GstD3	0.555497	0.274584	0.667	0.838	1
dco	0.560036	0.278519	0.394	0.353	1
Idh	0.564293	0.462748	0.485	0.559	1
Tango14	0.567585	0.297457	0.455	0.426	1
Rpb5	0.585466	0.354517	0.424	0.515	1
mRpL36	0.588147	0.27191	0.515	0.471	1
SdhD	0.596729	0.33924	0.515	0.5	1
mRpL14	0.599618	0.524428	0.515	0.529	1
SoxN	0.610506	0.281382	0.303	0.265	1
ND-AGGG	0.638646	0.276158	0.606	0.75	1
GCS2alpha	0.640932	0.280482	0.485	0.588	1
ttm50	0.658617	0.322658	0.394	0.382	1
Gart	0.67001	0.282332	0.303	0.279	1
pico	0.677598	0.277579	0.212	0.265	1
CG3328	0.678099	0.26796	0.121	0.103	1
corn	0.687927	0.268386	0.121	0.103	1
ND-19	0.699236	0.270592	0.727	0.779	1
E(bx)	0.702741	0.309425	0.333	0.309	1
Kap-alpha3	0.718422	0.303229	0.606	0.721	1
olf186-F	0.737483	0.340283	0.242	0.221	1
CG6950	0.743125	0.319453	0.394	0.426	1
CG17841	0.761553	0.306347	0.394	0.426	1
Pgi	0.770578	0.259119	0.576	0.706	1
Pfdn1	0.784147	0.328613	0.545	0.544	1
CG10638	0.801384	0.274826	0.333	0.353	1
CG5446	0.804685	0.324251	0.455	0.588	1
RhoL	0.823906	0.25888	0.424	0.412	1
SdhC	0.870086	0.250323	0.758	0.824	1
CG2147	0.870774	0.328637	0.273	0.265	1
Vps20	0.879768	0.412721	0.424	0.529	1
nsl1	0.881003	0.255197	0.364	0.441	1
CG5112	0.910445	0.271868	0.455	0.515	1
mRpL18	0.927548	0.251493	0.394	0.485	1
path	0.93136	0.260487	0.273	0.294	1
Kank	0.944433	0.261577	0.364	0.412	1
pst	0.955522	0.464679	0.242	0.279	1
mRpL43	0.976768	0.257302	0.364	0.382	1

## Sheet: Monoaminergic neurons
Columna1	p_val	avg_logFC	pct.1	pct.2	p_val_adj
Pdcd4	2.36435e-20	-0.810753	0.831	0.991	3.32522e-16
REPTOR-BP	1.14985e-19	-0.828588	0.597	0.948	1.61714e-15
LTV1	1.56124e-15	-0.620023	0.371	0.809	2.19573e-11
eEF1alpha1	3.46265e-15	-0.419696	0.984	1	4.86987e-11
CG5059	9.05947e-15	-0.746376	0.323	0.757	1.27412e-10
RpL39	2.09689e-14	-0.388032	0.992	1	2.94906e-10
Hsc70-4	4.25728e-14	0.513449	0.968	0.974	5.98744e-10
unk	5.17349e-14	-0.664711	0.484	0.878	7.276e-10
RpL15	1.22338e-13	-0.327973	0.984	1	1.72056e-09
ATPsynC	4.87126e-13	0.320013	0.992	1	6.85094e-09
Fer2LCH	5.64287e-13	-0.513684	0.863	0.991	7.93613e-09
pix	6.91574e-12	-0.44479	0.573	0.913	9.7263e-08
Hsp83	7.94787e-12	0.720592	0.879	0.783	1.11779e-07
Fkbp12	8.27102e-12	0.413205	0.96	1	1.16324e-07
Non1	8.72453e-12	-0.510374	0.653	0.913	1.22702e-07
smt3	2.08022e-11	0.442654	0.927	0.974	2.92563e-07
ATPsynE	2.94727e-11	0.409569	0.911	0.965	4.14504e-07
CG42566	3.0146e-11	-0.583621	0.226	0.617	4.23973e-07
eEF2	6.96146e-11	-0.376671	0.863	0.991	9.7906e-07
lncRNA:CR42862	7.14608e-11	-0.563421	0.718	0.93	1.00502e-06
CG9336	7.23565e-11	-0.394945	0.105	0.487	1.01762e-06
tsr	9.94497e-11	0.400948	0.944	0.991	1.39866e-06
Sirup	1.03554e-10	-0.533466	0.339	0.687	1.45639e-06
RpL5	1.05221e-10	-0.272517	0.968	1	1.47982e-06
CG6770	1.05838e-10	-0.582407	0.815	1	1.48851e-06
HmgZ	2.13723e-10	-0.481332	0.895	1	3.0058e-06
RpL29	2.43542e-10	-0.315205	0.952	1	3.42518e-06
hoip	3.2359e-10	0.612748	0.653	0.339	4.55097e-06
RpS3	6.24166e-10	-0.357597	0.919	1	8.77827e-06
eIF3m	6.32214e-10	-0.435077	0.661	0.913	8.89146e-06
Gapdh1	8.70273e-10	0.395626	0.992	1	1.22395e-05
jhamt	1.16761e-09	-0.327	0.073	0.4	1.64213e-05
awd	1.25763e-09	0.483212	0.879	0.983	1.76873e-05
Vti1b	1.29951e-09	-0.428031	0.274	0.643	1.82763e-05
CG14265	1.45261e-09	-0.315272	0	0.261	2.04295e-05
RpS29	1.52527e-09	-0.289063	0.984	1	2.14514e-05
RpL41	1.61636e-09	-0.325302	0.992	1	2.27325e-05
CG12384	1.63361e-09	-0.482257	0.613	0.843	2.2975e-05
lncRNA:CR34335	2.18212e-09	-0.521908	0.968	1	3.06893e-05
RpL32	2.36508e-09	-0.285701	1	1	3.32626e-05
ATPsynF	5.53937e-09	0.327569	0.968	0.991	7.79057e-05
Ldh	6.46972e-09	0.448408	0.944	0.965	9.09902e-05
COX7A	7.68167e-09	0.413135	0.903	0.991	0.000108035
RpL3	8.55208e-09	-0.296179	0.927	1	0.000120276
eIF3l	1.07307e-08	-0.359617	0.54	0.843	0.000150916
Rab7	1.21654e-08	-0.386868	0.556	0.861	0.000171094
CG15891	1.25658e-08	-0.413709	0.306	0.626	0.000176725
RpS6	1.46178e-08	-0.324708	0.879	1	0.000205584
Nph	2.14535e-08	0.530152	0.685	0.461	0.000301723
CG42258	2.16348e-08	-0.479174	0.524	0.791	0.000304272
Nplp2	2.5141e-08	-0.519877	0.508	0.878	0.000353583
CG32486	2.90498e-08	-0.395579	0.29	0.626	0.000408556
RpL7A	3.09295e-08	-0.259659	0.984	1	0.000434992
eIF3g1	3.82965e-08	-0.416848	0.669	0.878	0.000538601
CG2082	3.90977e-08	-0.402827	0.298	0.661	0.00054987
eIF3b	4.17497e-08	-0.370615	0.556	0.852	0.000587168
vsg	4.55505e-08	-0.382398	0.323	0.652	0.000640622
RpL24-like	4.8765e-08	-0.385779	0.798	0.983	0.000685831
cype	4.93287e-08	0.2542	0.968	1	0.000693758
CNBP	5.54709e-08	0.413592	0.903	0.93	0.000780143
CG44325	6.84538e-08	-0.425585	0.306	0.67	0.000962735
Hsp26	7.97182e-08	0.76988	0.685	0.443	0.00112116
Drat	8.11834e-08	-0.320584	0.887	0.991	0.00114176
Thor	8.18885e-08	-0.484717	0.419	0.722	0.00115168
fabp	9.52889e-08	0.602703	0.823	0.878	0.00134014
RpS12	1.02278e-07	-0.262511	0.976	1	0.00143844
CG42394	1.13674e-07	-0.644506	0.766	0.965	0.00159871
CG8157	1.22127e-07	-0.70989	0.363	0.757	0.00171759
Cyp1	1.3628e-07	0.261646	0.984	1	0.00191664
RpL9	1.6155e-07	-0.306746	0.895	0.991	0.00227204
udd	1.7932e-07	-0.347417	0.218	0.53	0.00252195
CG31635	1.82715e-07	-0.364716	0.395	0.713	0.0025697
unc-104	2.4742e-07	-0.379832	0.718	0.957	0.00347971
MtnA	2.48334e-07	-0.350218	0.363	0.661	0.00349257
RpL4	2.54826e-07	-0.256559	0.96	1	0.00358387
Tim8	2.65172e-07	0.489184	0.742	0.583	0.00372937
REPTOR	2.85192e-07	-0.393784	0.46	0.791	0.00401094
CG1572	3.1034e-07	-0.319189	0.218	0.539	0.00436462
TMS1	3.54809e-07	-0.326051	0.613	0.887	0.00499004
Rab39	3.75275e-07	-0.349137	0.363	0.661	0.00527787
CG13227	3.79663e-07	-0.254489	0.032	0.261	0.00533959
Nlp	3.9988e-07	0.439971	0.831	0.896	0.00562391
CG15098	4.11166e-07	-0.349224	0.194	0.487	0.00578264
Tspo	4.36629e-07	-0.381735	0.355	0.626	0.00614075
CG42392	5.62821e-07	-0.383997	0.669	0.896	0.00791551
CG11267	6.50202e-07	0.448391	0.831	0.817	0.00914445
Hsp27	6.7898e-07	0.754483	0.476	0.2	0.00954918
His3.3B	7.12901e-07	-0.35989	0.823	0.991	0.0100262
ringer	7.38153e-07	-0.343996	0.871	0.983	0.0103814
Syt4	7.67753e-07	-0.277075	0.766	0.965	0.0107977
p23	7.68625e-07	0.371437	0.863	0.896	0.0108099
Ip259	7.88116e-07	-0.373898	0.653	0.904	0.0110841
InR	8.79035e-07	-0.407891	0.677	0.887	0.0123627
CG13603	9.56741e-07	-0.285882	0.266	0.583	0.0134556
CG9338	9.57901e-07	-0.334819	0.089	0.339	0.0134719
CG11658	1.06794e-06	-0.350448	0.202	0.478	0.0150195
Act42A	1.07207e-06	0.333249	0.879	0.939	0.0150775
ytr	1.11419e-06	-0.311265	0.323	0.6	0.01567
COX6B	1.144e-06	0.334075	0.911	0.991	0.0160891
Glut4EF	1.15025e-06	-0.334846	0.782	0.991	0.0161771
nmo	1.1618e-06	0.420587	0.952	0.991	0.0163395
NHP2	1.29879e-06	0.531407	0.565	0.313	0.0182662
CG4364	1.36945e-06	-0.311601	0.331	0.635	0.0192599
Cp1	1.38088e-06	-0.326534	0.613	0.87	0.0194207
CG9003	1.46831e-06	-0.314601	0.185	0.47	0.0206503
tau	1.68645e-06	-0.324556	0.766	0.965	0.0237183
Mpcp2	1.77061e-06	-0.27654	0.815	0.974	0.0249018
Fkbp39	2.24737e-06	0.593203	0.653	0.513	0.031607
Hsp67Bc	2.49556e-06	0.6291	0.823	0.687	0.0350975
RpL38	2.89006e-06	-0.292408	0.976	1	0.0406459
uex	2.93513e-06	0.508808	0.847	0.809	0.0412797
Jafrac1	3.36639e-06	0.412151	0.855	0.843	0.0473449
RpS14b	4.34077e-06	-0.316842	0.806	0.983	0.0610486
ATPsynO	4.4548e-06	0.345872	0.863	0.896	0.0626523
Ilp5	4.45617e-06	0.858681	0.435	0.226	0.0626715
Lk	5.08014e-06	-0.324967	0.169	0.417	0.0714471
Tpi	5.43068e-06	0.286448	0.968	0.991	0.0763771
bigmax	5.67777e-06	-0.272151	0.169	0.417	0.0798522
Smox	6.64146e-06	-0.34449	0.548	0.783	0.0934055
mRpS28	8.43259e-06	-0.256385	0.516	0.774	0.118596
NPF	8.85029e-06	0.380031	0.258	0.052	0.12447
NFAT	1.20357e-05	-0.261053	0.387	0.678	0.16927
Chmp1	1.24516e-05	-0.282902	0.621	0.852	0.175119
dpr7	1.32688e-05	0.409456	0.903	0.939	0.186613
pAbp	1.40885e-05	-0.250406	0.927	1	0.198141
lncRNA:CR42491	1.43006e-05	0.32832	0.29	0.078	0.201123
eEF5	1.66144e-05	-0.258013	0.903	1	0.233665
CG4116	1.68395e-05	0.376608	0.169	0.009	0.236831
CG4577	1.77816e-05	-0.379624	0.766	0.922	0.250081
SNF4Agamma	1.87677e-05	-0.287143	0.452	0.73	0.263949
betaTub56D	2.03599e-05	0.291844	0.992	1	0.286341
eIF3k	2.30664e-05	-0.294792	0.742	0.896	0.324406
prominin-like	2.32178e-05	-0.304708	0.411	0.696	0.326535
CG9691	2.41448e-05	-0.263898	0.234	0.487	0.339573
eIF3d1	2.6279e-05	-0.25523	0.565	0.791	0.369587
Hsp68	2.99597e-05	0.501566	0.274	0.07	0.421354
Flo1	3.61104e-05	-0.267183	0.629	0.887	0.507856
CG17508	3.69018e-05	-0.256565	0.403	0.652	0.518988
Mnn1	3.81029e-05	-0.272097	0.395	0.643	0.535879
Zcchc7	3.89387e-05	-0.257306	0.097	0.304	0.547634
alc	4.2783e-05	-0.288201	0.411	0.678	0.6017
shep	4.30429e-05	0.277214	1	1	0.605355
CG43222	4.44673e-05	0.381767	0.879	0.974	0.625388
fok	5.34734e-05	-0.255348	0.653	0.904	0.75205
Adf1	5.66898e-05	-0.252694	0.323	0.565	0.797286
UQCR-14	5.84414e-05	0.298084	0.895	0.974	0.82192
CanB	5.86739e-05	0.288574	0.911	0.957	0.825189
nop5	6.00749e-05	0.499812	0.5	0.278	0.844894
ox	6.0787e-05	0.346043	0.798	0.913	0.854909
CG4199	6.15062e-05	-0.305853	0.185	0.409	0.865023
Pfdn6	6.30853e-05	0.406116	0.782	0.774	0.887232
Ilp2	6.64334e-05	0.780571	0.629	0.6	0.93432
CG45050	7.09915e-05	-0.262077	0.831	0.965	0.998425
tna	9.2938e-05	-0.330598	0.831	1	1
CG5758	9.77729e-05	-0.29782	0.306	0.557	1
CG10082	0.000109521	-0.301745	0.452	0.643	1
eIF3c	0.000110514	-0.27355	0.403	0.652	1
mt:CoII	0.000112865	0.318472	0.984	1	1
Sod1	0.000119853	0.295337	0.823	0.948	1
LSm3	0.000124475	0.358384	0.46	0.209	1
CG12099	0.000126151	-0.256204	0.282	0.504	1
Uhg4	0.000142655	0.503415	0.613	0.47	1
Ctr9	0.000144493	-0.275647	0.371	0.6	1
Nop60B	0.000145747	0.382002	0.54	0.33	1
Pdf	0.000147078	0.259685	0.258	0.078	1
Ran	0.000177449	0.343592	0.806	0.817	1
Sidpn	0.000187009	-0.281445	0.339	0.574	1
COX4	0.000189848	0.265239	0.927	0.974	1
lncRNA:CR40469	0.000195496	-0.433718	0.258	0.504	1
IA-2	0.000211582	-0.341836	0.984	1	1
CG1354	0.000252679	-0.265466	0.468	0.678	1
CG34404	0.000282175	-0.281672	0.266	0.461	1
Ptth	0.000293724	0.347671	0.169	0.026	1
Trx-2	0.000295641	0.330352	0.855	0.93	1
SmE	0.000299363	0.45886	0.669	0.583	1
CG1648	0.000312362	-0.337805	0.339	0.574	1
GlyP	0.000355831	0.317387	0.903	0.939	1
CG46301	0.000391225	-0.300034	0.702	0.896	1
Taf6	0.000424118	-0.253925	0.169	0.348	1
CG13096	0.000467037	0.33807	0.282	0.113	1
Crz	0.000522375	0.291752	0.403	0.209	1
CG33144	0.000555946	-0.368829	0.347	0.583	1
svr	0.000595774	-0.261096	0.677	0.843	1
Atg8a	0.000602895	-0.252965	0.831	0.974	1
SmD3	0.000696529	0.370061	0.524	0.357	1
CG5955	0.000700227	0.320283	0.266	0.096	1
Alg-2	0.000703411	0.33185	0.734	0.652	1
Mdh2	0.000714782	0.280268	0.879	0.878	1
CG13920	0.00071992	0.362127	0.823	0.835	1
Rab3	0.000752824	-0.268509	0.685	0.861	1
NaCP60E	0.000777454	-0.251343	0.597	0.8	1
MYPT-75D	0.000787762	-0.342106	0.185	0.374	1
Octbeta2R	0.000978192	-0.289128	0.355	0.6	1
sty	0.000992655	-0.280037	0.306	0.522	1
Ms	0.00102107	0.881291	0.734	0.661	1
kek1	0.00105915	0.5021	0.919	0.861	1
CG4250	0.0010603	-0.261532	0.282	0.461	1
Rbp1-like	0.00109562	0.29484	0.895	0.939	1
mtt	0.00109858	-0.318269	0.185	0.365	1
La	0.00115109	0.340125	0.54	0.391	1
Pal2	0.00117121	-0.279544	0.79	0.957	1
mRpL12	0.00119768	0.414305	0.613	0.461	1
Argk	0.00123726	0.304806	0.944	0.991	1
dlg1	0.00137366	0.337238	0.903	0.93	1
mt:Cyt-b	0.00139162	0.333478	0.992	0.991	1
nub	0.0014249	-0.456937	0.137	0.304	1
Gat	0.00158269	0.810477	0.645	0.548	1
CG6330	0.00194281	-0.254817	0.734	0.887	1
CG12817	0.00210522	-0.26809	0.298	0.47	1
CG34132	0.00265926	0.285728	0.726	0.704	1
CG14423	0.00295605	0.648101	0.258	0.13	1
CG6084	0.00300115	0.400895	0.452	0.278	1
eEF1delta	0.00312052	0.386436	0.573	0.487	1
Sc2	0.00317318	0.376463	0.548	0.409	1
lwr	0.00336594	0.286344	0.806	0.87	1
rin	0.00339952	0.291634	0.847	0.922	1
CCT3	0.00340962	0.358791	0.621	0.487	1
CG17734	0.00355653	0.410928	0.685	0.67	1
vvl	0.00366617	-0.30859	0.315	0.496	1
Xrp1	0.00390093	-0.51678	0.508	0.67	1
alphaTub84D	0.00393951	0.297697	0.758	0.748	1
CG7637	0.00399107	0.296274	0.742	0.67	1
dod	0.0043707	0.307205	0.645	0.557	1
CG10470	0.00441689	0.360934	0.621	0.522	1
futsch	0.00463666	0.274068	0.976	0.991	1
Dak1	0.00475566	0.260095	0.839	0.878	1
SNRPG	0.00509043	0.290513	0.718	0.774	1
CG5065	0.00526472	0.33996	0.766	0.843	1
Mkp3	0.00606397	-0.310949	0.895	0.922	1
Syx1A	0.00687213	0.256561	0.984	0.991	1
Proc	0.00722188	-0.684715	0.242	0.409	1
DAT	0.00756834	0.586615	0.573	0.461	1
Fib	0.00765484	0.34097	0.492	0.339	1
Dbi	0.00771074	0.326447	0.411	0.27	1
dpr19	0.00771108	0.350979	0.694	0.635	1
Npc2a	0.00775552	0.318544	0.476	0.348	1
GABA-B-R1	0.00791674	0.388196	0.766	0.783	1
Hr4	0.00792806	0.454523	0.532	0.391	1
CG42817	0.00793855	-0.251275	0.508	0.687	1
mtSSB	0.00807314	0.269384	0.411	0.27	1
Optix	0.00842704	0.384583	0.21	0.087	1
CG2269	0.00856322	-0.481542	0.976	0.991	1
mirr	0.00869426	-0.298268	0.21	0.365	1
RpII18	0.00895919	0.377363	0.645	0.6	1
spt4	0.00900374	0.335667	0.508	0.365	1
luna	0.00940597	0.358973	0.847	0.852	1
CG7185	0.00949164	0.292676	0.589	0.47	1
CCT5	0.00988546	0.274428	0.516	0.409	1
mRpL52	0.0101785	0.330125	0.508	0.374	1
dysc	0.0104748	0.268156	0.976	0.974	1
Uhg2	0.0106524	0.342663	0.444	0.313	1
grp	0.0109462	0.340075	0.669	0.626	1
CG3939	0.0110481	0.272175	0.339	0.2	1
Pfdn5	0.0112407	0.304757	0.685	0.722	1
ND-ACP	0.0115096	0.293822	0.806	0.87	1
disco	0.0126737	-0.440998	0.073	0.174	1
SmF	0.0145095	0.292748	0.532	0.443	1
Inos	0.0150397	0.374288	0.548	0.478	1
CG3598	0.0156748	0.265047	0.153	0.061	1
Hrb98DE	0.0158126	0.314877	0.815	0.843	1
Arc1	0.0160779	-0.503052	0.097	0.2	1
CG8397	0.0192929	0.301962	0.548	0.426	1
Nipped-B	0.0195363	0.428495	0.766	0.835	1
PIP4K	0.0205559	0.262864	0.782	0.852	1
CG8498	0.0207005	0.289021	0.71	0.713	1
ND-B12	0.0210382	0.250061	0.782	0.826	1
Obp99a	0.0210677	0.372043	0.702	0.722	1
CG15236	0.0212304	0.291819	0.435	0.304	1
Cngl	0.021736	0.418489	0.944	0.948	1
Pomp	0.0219668	0.324118	0.661	0.652	1
Pur-alpha	0.0225353	0.316091	0.71	0.687	1
alrm	0.0226358	0.638336	0.565	0.513	1
Rpb10	0.0232478	0.255513	0.653	0.583	1
Obp44a	0.0234565	0.318602	0.79	0.939	1
Set	0.0235081	0.256627	0.637	0.617	1
SsRbeta	0.0236178	0.317679	0.548	0.478	1
P32	0.0237927	0.355134	0.581	0.504	1
Rpb11	0.0239918	0.291591	0.573	0.496	1
Task6	0.0241963	0.335579	0.621	0.522	1
CG31997	0.0245918	0.317658	0.25	0.139	1
Sh	0.0246382	0.251261	0.976	0.983	1
PDCD-5	0.025111	0.283947	0.556	0.478	1
CG5281	0.0252601	0.379559	0.71	0.652	1
ND-30	0.0253846	0.281511	0.685	0.696	1
Roc1a	0.0262077	0.263507	0.766	0.852	1
san	0.0268343	0.316948	0.5	0.365	1
MCTS1	0.0274571	0.384358	0.613	0.574	1
SC35	0.0286679	0.291235	0.613	0.565	1
CG11191	0.0326573	0.280871	0.363	0.252	1
CG8860	0.0329652	0.276389	0.734	0.8	1
ct	0.0335923	-0.314086	0.21	0.322	1
FoxP	0.0336385	0.379582	0.484	0.435	1
CG30089	0.0346034	0.362903	0.266	0.165	1
prtp	0.0349938	0.306312	0.661	0.609	1
Chro	0.0350322	0.283881	0.315	0.2	1
ple	0.0381041	0.302327	0.484	0.322	1
CG11000	0.0388184	0.278177	0.839	0.93	1
MFS3	0.0388441	0.309132	0.75	0.791	1
scro	0.0397712	0.475653	0.323	0.217	1
Tbh	0.0403015	-0.591737	0.145	0.243	1
CG7220	0.0406903	0.343164	0.565	0.478	1
CG43902	0.042048	-0.318536	0.315	0.409	1
Pde6	0.0428495	0.460444	0.758	0.73	1
Dh31-R	0.0472526	0.344488	0.347	0.243	1
bma	0.0508197	0.411576	0.516	0.435	1
CG11030	0.0526632	0.355439	0.315	0.217	1
CG5446	0.0526993	0.316491	0.653	0.696	1
Cdk7	0.0534838	0.253788	0.21	0.122	1
Ten-a	0.0552627	0.399096	0.919	0.948	1
CG31712	0.0566192	0.343689	0.702	0.696	1
CG14883	0.0567614	0.334162	0.532	0.496	1
CG6024	0.0569282	0.311931	0.653	0.661	1
flw	0.0576546	0.370899	0.718	0.748	1
Antp	0.0598139	-0.627886	0.048	0.113	1
Myc	0.0599513	0.25985	0.702	0.643	1
CG7607	0.0605174	0.279802	0.331	0.243	1
SpdS	0.0627713	0.256346	0.411	0.304	1
CG1402	0.0634637	0.368163	0.234	0.139	1
Uhg5	0.0643769	0.335618	0.435	0.348	1
AstC	0.0650882	-0.285679	0.331	0.209	1
CG9922	0.0651983	0.282057	0.581	0.522	1
SerT	0.06541	-0.350169	0.315	0.417	1
Rgk1	0.0683605	0.330969	0.645	0.67	1
HDAC1	0.0693569	0.29282	0.508	0.435	1
GstZ2	0.0693807	0.274847	0.645	0.652	1
beat-Ia	0.0782954	0.265864	0.25	0.165	1
CG8671	0.0797017	0.277416	0.726	0.713	1
sdt	0.0802924	0.265855	0.887	0.904	1
CG2865	0.0823913	0.257596	0.621	0.539	1
lov	0.0830228	0.322238	0.153	0.087	1
AnxB9	0.0831704	-0.462095	0.258	0.357	1
DnaJ-1	0.0881627	0.294412	0.468	0.409	1
kcc	0.0900798	0.256829	0.75	0.748	1
Trh	0.0924249	-0.467984	0.435	0.504	1
nAChRalpha3	0.0960735	0.308278	0.565	0.696	1
fd102C	0.0995659	0.332592	0.306	0.226	1
CG12567	0.100196	0.274764	0.355	0.287	1
glo	0.101875	0.289967	0.589	0.574	1
spi	0.102281	0.286814	0.653	0.626	1
Hrb87F	0.113164	0.251003	0.548	0.522	1
cpo	0.115772	0.307533	0.879	0.922	1
AANATL7	0.116561	0.369496	0.597	0.6	1
Crk	0.119687	0.300454	0.702	0.765	1
DIP-alpha	0.12873	0.476551	0.137	0.078	1
lncRNA:roX2	0.129108	-0.252832	0.685	0.757	1
CG9657	0.130197	0.256842	0.234	0.165	1
tnc	0.130781	0.288459	0.29	0.209	1
CG1677	0.134917	0.300269	0.766	0.809	1
CG5021	0.135732	0.301518	0.508	0.452	1
sNPF	0.138395	-0.602137	0.194	0.27	1
Ets65A	0.139454	0.268151	0.21	0.139	1
natalisin	0.139742	0.272296	0.258	0.191	1
Baldspot	0.144225	0.326242	0.661	0.661	1
Taf10b	0.148589	0.270534	0.718	0.748	1
CG8289	0.152496	0.254284	0.427	0.4	1
scaf6	0.157543	0.312496	0.444	0.365	1
sick	0.158306	0.251341	0.427	0.348	1
Rh7	0.158556	0.358408	0.25	0.183	1
Rab26	0.162505	0.254297	0.734	0.713	1
JIL-1	0.164553	0.326603	0.621	0.617	1
slpr	0.166225	0.255769	0.379	0.322	1
vg	0.169959	-0.344793	0.073	0.122	1
Hel25E	0.175538	0.271081	0.613	0.643	1
Fas2	0.18091	0.57969	0.669	0.661	1
fred	0.182825	0.297835	0.548	0.478	1
Rab27	0.197008	0.368589	0.718	0.713	1
SPR	0.211851	0.39412	0.589	0.522	1
GluRIB	0.218722	0.260339	0.742	0.722	1
CG42389	0.231781	0.251435	0.734	0.748	1
hdc	0.250504	0.271924	0.556	0.522	1
Aac11	0.269265	0.250636	0.629	0.678	1
beat-Vc	0.272456	0.261104	0.427	0.383	1
Ipp	0.288163	0.269771	0.645	0.687	1
p130CAS	0.306794	0.348275	0.589	0.652	1
Epac	0.320061	0.296448	0.315	0.278	1
CG4133	0.323991	0.283451	0.379	0.365	1
Tdc2	0.326888	-0.592588	0.121	0.157	1
CG31522	0.332059	0.256217	0.468	0.443	1
CAH1	0.340389	0.256413	0.339	0.304	1
CG32982	0.366783	0.252115	0.419	0.496	1
rut	0.369234	0.280633	0.492	0.452	1
CG9164	0.375486	0.272192	0.508	0.452	1
MFS9	0.401841	0.310853	0.573	0.609	1
CG17193	0.413678	0.263262	0.565	0.539	1
G9a	0.420619	0.258002	0.581	0.6	1
pros	0.422854	0.282073	0.21	0.174	1
mgl	0.433185	0.432598	0.387	0.374	1
mrj	0.469282	0.25127	0.46	0.452	1
dpr17	0.474766	0.250757	0.508	0.504	1
CG14024	0.479298	0.256335	0.597	0.626	1
Wnt4	0.49384	0.32808	0.121	0.096	1
Nhe3	0.503472	0.262389	0.444	0.426	1
CG45263	0.518579	0.506338	0.492	0.487	1
eys	0.524662	0.317786	0.427	0.409	1
beat-Ic	0.524989	0.279662	0.379	0.374	1
lncRNA:CR45223	0.532179	0.281119	0.169	0.139	1
Maf1	0.5357	0.253322	0.621	0.696	1
CG43085	0.544909	0.263125	0.427	0.4	1
dpr6	0.583179	0.259075	0.589	0.626	1
CG14075	0.620399	-0.421511	0.145	0.165	1
VGlut	0.63588	-0.303726	0.629	0.678	1
heph	0.653764	0.318673	0.645	0.713	1
CG9650	0.665772	0.414084	0.331	0.33	1
Gyc89Db	0.678085	0.277192	0.395	0.409	1
lncRNA:CR44832	0.696231	0.296982	0.435	0.557	1
Gs2	0.698646	0.422601	0.565	0.617	1
CG42541	0.702304	0.370416	0.548	0.617	1
CG12239	0.702781	0.348246	0.371	0.4	1
CG43373	0.738702	0.262324	0.194	0.183	1
NetB	0.810972	0.252799	0.444	0.504	1
CG3655	0.835762	0.318315	0.226	0.217	1
CG42668	0.910523	0.388575	0.395	0.426	1
CG13739	0.920174	0.324852	0.25	0.261	1
CG9932	0.927893	0.365144	0.476	0.504	1
cdi	0.95166	0.284649	0.685	0.748	1
CG7191	0.987292	-0.258367	0.202	0.209	1
Octbeta3R	0.987455	0.292697	0.524	0.574	1
CG42342	0.997716	0.378638	0.645	0.687	1

## Sheet: Muscle cells
Columna1	p_val	avg_logFC	pct.1	pct.2	p_val_adj
CG42566	3.03918e-09	-0.591631	0.097	0.674	4.2743e-05
CtsB1	5.4258e-08	-0.835502	0.145	0.696	0.000763085
Atg8a	1.38347e-07	-0.775395	0.403	0.935	0.00194572
Vta1	5.21786e-07	-0.597648	0.113	0.609	0.0073384
Sirup	6.19889e-07	-0.943244	0.323	0.826	0.00871811
CG32188	0.0412621	-3.01687	0.081	0.217	1
Cp1	1.48985e-06	-0.74831	0.226	0.696	0.0209532
CG6770	1.75695e-06	-0.650428	0.597	1	0.0247098
Pih1D1	2.10724e-06	-0.466162	0.048	0.435	0.0296362
awd	2.16438e-06	0.499591	1	0.957	0.0304398
Kap-alpha3	2.85207e-06	-0.563816	0.194	0.696	0.0401116
Tsp42Ee	5.23303e-06	-0.686264	0.306	0.783	0.0735973
CG7115	6.41986e-06	-0.513582	0.048	0.413	0.0902889
CG32189	0.00837915	-2.88494	0.097	0.304	1
Rpn3	1.05244e-05	-0.34131	0.048	0.413	0.148015
CG2182	1.64048e-05	-0.453202	0.065	0.413	0.230717
CG9338	1.83592e-05	-0.923397	0.355	0.848	0.258204
Pde1c	1.83957e-05	-0.539989	0.081	0.435	0.258717
CG14109	1.90976e-05	-0.39483	0.081	0.457	0.268589
lcs	0.0123502	-2.71729	0.032	0.174	1
Lsm12	2.39289e-05	-0.347018	0.081	0.435	0.336535
c12.1	2.5661e-05	-0.293236	0.081	0.457	0.360897
CG14265	0.00146253	-2.61341	0.081	0.326	1
Rbp9	2.66198e-05	-0.397516	0.016	0.304	0.374381
Fkbp12	2.67973e-05	0.577488	0.903	0.891	0.376877
pdgy	2.69986e-05	-0.376441	0.097	0.478	0.379708
galla-1	2.99056e-05	-0.385799	0.177	0.63	0.420593
CG34166	3.39998e-05	-0.887321	0.048	0.37	0.478173
CG9336	3.91798e-05	-0.662848	0.387	0.848	0.551024
Pdcd4	3.93553e-05	-0.600975	0.403	0.87	0.553493
Cyt-c-p	3.97062e-05	0.883757	0.855	0.87	0.558428
Wdfy2	4.01122e-05	-0.403797	0.081	0.413	0.564138
CG8481	4.03683e-05	-0.486429	0.113	0.478	0.567739
p38a	4.2746e-05	-0.479505	0.032	0.326	0.601179
nuf	4.78419e-05	-0.356944	0.065	0.413	0.672849
lncRNA:CR43283	4.97585e-05	-0.447476	0.113	0.5	0.699803
CG32486	5.15471e-05	-0.374028	0.065	0.391	0.724958
Marf	5.96906e-05	-0.290766	0.129	0.522	0.839489
RpL39	6.2204e-05	-0.274248	1	1	0.874837
yip2	6.6607e-05	-0.32006	0.145	0.522	0.936761
slim	6.7866e-05	-0.330854	0.048	0.348	0.954468
fry	7.17304e-05	-0.262845	0.016	0.283	1
CG3630	7.18751e-05	-0.697296	0.129	0.457	1
Ras85D	7.48371e-05	-0.372962	0.145	0.543	1
CG42319	8.3832e-05	-0.883833	0.129	0.5	1
CG14298	0.000101841	-0.682645	0.016	0.261	1
RpL3	0.000104444	-0.29737	1	1	1
zormin	0.000108491	-0.492965	0.242	0.674	1
CG7378	0.000121961	-0.378451	0.081	0.413	1
RNaseX25	0.000125237	-0.310245	0.032	0.304	1
bigmax	0.000126275	-0.420741	0.081	0.413	1
CG11699	0.000129477	-0.332787	0.194	0.63	1
Yippee	0.000134748	-0.316236	0.065	0.37	1
Met	0.000141479	-0.503451	0.081	0.391	1
CG13460	0.247995	-2.54696	0.065	0.13	1
TfIIA-S	0.000149878	-0.491982	0.323	0.717	1
Peritrophin-15a	0.107978	-2.33635	0.081	0.196	1
MFS17	0.000150089	-0.381838	0.081	0.413	1
trx	0.000153661	-0.456991	0.161	0.543	1
CG13227	0.00015922	-0.319354	0.016	0.261	1
CG14207	0.000179991	-0.60257	0.5	0.826	1
Alg11	0.000180067	-0.438896	0.097	0.413	1
CG13868	0.000180524	-0.410237	0.081	0.391	1
REPTOR-BP	0.000198041	-0.362609	0.355	0.783	1
Flo1	0.000201858	-0.38698	0.29	0.717	1
Fer2LCH	0.000204414	-0.45876	0.677	0.978	1
CG14903	0.000211728	-0.406718	0.032	0.283	1
Der-2	0.000211958	-0.272772	0.048	0.326	1
Pkn	0.000211958	-0.35961	0.048	0.326	1
CG7017	0.0637331	-2.20465	0.032	0.13	1
Cyp6a17	0.000234888	-0.33491	0.097	0.413	1
CG43427	0.000237154	-0.373222	0.161	0.5	1
kune	0.000237487	-0.298016	0.081	0.391	1
D19B	0.000239161	-0.276204	0.032	0.283	1
COQ7	0.000243306	-0.250568	0.113	0.457	1
Paip2	0.000245407	-0.393094	0.194	0.565	1
CG12237	0.00024569	-0.285978	0.081	0.391	1
Calr	0.000248685	0.65158	0.823	0.783	1
Vinc	0.00025282	-0.510104	0.129	0.457	1
CG12262	0.000267096	-0.479478	0.145	0.478	1
Arc1	0.0002771	-0.534561	0.226	0.63	1
UbcE2H	0.000286144	-0.356392	0.129	0.457	1
fau	0.000287841	-0.604599	0.274	0.609	1
conu	0.000292416	-0.340665	0.032	0.283	1
CG15784	0.000306341	-0.432349	0	0.196	1
CG4563	0.000306341	-0.67903	0	0.196	1
rl	0.000315728	-0.386359	0.161	0.522	1
CG8547	0.000320363	-0.456794	0.177	0.522	1
U2af50	0.000343976	-0.393921	0.194	0.543	1
fok	0.00034594	-0.362826	0.21	0.609	1
Eno	0.00034847	0.526671	0.903	0.957	1
CG8369	0.000352473	-0.341923	0.194	0.587	1
cathD	0.000359164	-0.456674	0.129	0.435	1
lolal	0.000363079	-0.467661	0.242	0.609	1
disco-r	0.00038071	-0.391108	0.129	0.478	1
Phae1	0.000381051	-0.530116	0.016	0.239	1
CG10527	0.000385593	-0.563869	0.468	0.826	1
Max	0.000396839	-0.428242	0.113	0.435	1
Fem-1	0.000407674	-0.274917	0.065	0.348	1
Tsp42Ei	0.000410205	-0.357646	0.048	0.304	1
CG8321	0.00041758	-0.404548	0.032	0.261	1
PI31	0.00042835	-0.323363	0.097	0.391	1
Lk6	0.00044415	-0.588275	0.403	0.826	1
LysD	0.0167863	-2.15965	0.048	0.196	1
Galphai	0.000455816	-0.31716	0.081	0.37	1
sowah	0.000458282	-0.256735	0.048	0.304	1
GILT3	0.000458282	-0.374828	0.048	0.304	1
CG12384	0.000465786	-0.354542	0.371	0.804	1
rudhira	0.000466138	-0.28309	0.194	0.565	1
RpL11	0.000496947	-0.321697	0.984	1	1
ringer	0.000499303	-0.607058	0.403	0.739	1
Rab18	0.000512555	-0.353949	0.145	0.478	1
pyd	0.000517523	-0.46776	0.113	0.413	1
CG13603	0.000530588	-0.308124	0.048	0.304	1
mxt	0.000558999	-0.305928	0.145	0.478	1
CG31715	0.000559584	-0.251749	0.194	0.587	1
Trs31	0.000565926	-0.368303	0.129	0.435	1
shn	0.000574111	-0.274114	0.032	0.261	1
how	0.0005813	-0.537868	0.194	0.543	1
CG5902	0.000591647	-0.264982	0.048	0.304	1
whd	0.000591647	-0.316113	0.048	0.304	1
KrT95D	0.00060067	-0.368972	0.129	0.435	1
CanA1	0.000610789	-0.477463	0.016	0.217	1
CG12522	0.259593	-2.08511	0.081	0.152	1
Rpt6	0.000616273	-0.354335	0.161	0.5	1
Chmp1	0.000617325	-0.273971	0.323	0.739	1
CG11486	0.000619177	-0.452848	0.29	0.696	1
godzilla	0.00062183	-0.270792	0.065	0.326	1
Neurochondrin	0.000622623	-0.538891	0.226	0.587	1
CG4829	0.000642705	-0.656178	0.081	0.348	1
Zip99C	0.000645768	-0.296112	0.032	0.261	1
TpnC73F	0.000651169	-0.731159	0.387	0.761	1
Esyt2	0.000656525	-0.382394	0.129	0.435	1
cpb	0.000659317	-0.391472	0.161	0.478	1
E(spl)mbeta-HLH	0.000666249	-0.354457	0.016	0.217	1
MED18	0.000666249	-0.372848	0.016	0.217	1
Rcd1	0.000695703	-0.270324	0.016	0.217	1
CG15674	0.000707814	-0.295688	0	0.174	1
CG15126	0.000707814	-0.419387	0	0.174	1
CG3106	0.000707814	-0.545555	0	0.174	1
CG17145	0.000707814	-0.622305	0	0.174	1
CG15550	0.000707814	-0.894068	0	0.174	1
CG13947	0.0455487	-2.07425	0.081	0.217	1
Pli	0.000713183	-0.316346	0.065	0.326	1
Akap200	0.000713498	-0.323569	0.258	0.652	1
Fkbp39	0.000721958	0.85726	0.613	0.435	1
Syb	0.000737494	-0.454905	0.29	0.652	1
CG45076	0.000744734	-0.493619	0.274	0.652	1
CG32147	0.000756053	-0.432864	0.194	0.565	1
Atg14	0.000756811	-0.338138	0.048	0.283	1
CG13124	0.000788644	-0.51262	0.29	0.609	1
Dg	0.000802065	-0.323679	0.161	0.478	1
Rab1	0.000813319	-0.417382	0.548	0.935	1
Aac11	0.000819656	-0.30051	0.129	0.413	1
cold	0.000850536	-0.364712	0.065	0.304	1
CG7523	0.000854402	-0.326916	0.129	0.435	1
Adf1	0.000911008	-0.448027	0.065	0.304	1
Treh	0.000930003	-0.295554	0.097	0.37	1
csw	0.000975398	-0.271474	0.113	0.413	1
ttk	0.000975445	-0.349142	0.065	0.304	1
Glut4EF	0.000984953	-0.44908	0.355	0.826	1
CNBP	0.000992896	0.569636	0.823	0.826	1
atilla	0.0010164	-0.59174	0.258	0.63	1
Atf3	0.00102098	-0.360389	0.194	0.522	1
ref(2)P	0.00105621	-0.322237	0.161	0.478	1
CG10912	0.00111593	-0.573821	0.032	0.239	1
maf-S	0.00114369	-0.324119	0.226	0.565	1
Kaz-m1	0.047829	-1.86076	0.081	0.217	1
Scgbeta	0.00118919	-0.255223	0.097	0.37	1
CG4768	0.00120559	-0.346565	0.032	0.239	1
CG7953	0.00120559	-0.870404	0.032	0.239	1
CG1572	0.00121651	-0.670717	0.419	0.804	1
eEF1delta	0.00123787	0.872337	0.629	0.543	1
wgn	0.00124717	-0.384656	0.081	0.326	1
Jon25Bii	0.00126633	-0.949035	0.129	0.413	1
Lmpt	0.00127213	-0.503475	0.274	0.63	1
Arpc5	0.00127641	-0.420089	0.161	0.478	1
Rab5	0.00132255	-0.392054	0.177	0.478	1
RpS14b	0.00136531	-0.403028	0.823	0.978	1
Phae2	0.00143408	-0.99503	0.016	0.196	1
CG7879	0.00146253	-0.400511	0.081	0.326	1
CG13324	0.000229666	-1.85479	0.032	0.283	1
AnxB9	0.00147722	-0.316212	0.435	0.87	1
alphaTub84B	0.00148312	0.347857	0.984	1	1
Fer1HCH	0.0015474	-0.457414	0.532	0.848	1
CG10311	0.00157143	-0.624536	0.226	0.5	1
CG31689	0.00157445	-0.270694	0.032	0.239	1
CG5612	0.00159448	-0.482593	0.048	0.261	1
CG34325	0.00161548	-0.579574	0.145	0.413	1
CG5611	0.00162193	-0.287461	0	0.152	1
betaTub60D	0.00162193	-0.288505	0	0.152	1
CG6839	0.00162193	-0.356666	0	0.152	1
CG8389	0.00162193	-0.363444	0	0.152	1
CG10911	0.00162193	-0.397893	0	0.152	1
CG12115	0.00162193	-0.606093	0	0.152	1
Sur	0.00162915	-0.267144	0.016	0.196	1
Hipk	0.00163412	-0.272405	0.258	0.652	1
CG14253	0.00165191	-0.412073	0.048	0.261	1
bc10	0.00171124	-0.330528	0.048	0.261	1
grk	0.00177246	-0.311303	0.016	0.196	1
CG13102	0.00177246	-0.465615	0.016	0.196	1
Alas	0.00177253	-0.299794	0.048	0.261	1
Ubc6	0.00181589	-0.408895	0.242	0.587	1
CG12163	0.00182266	-0.300616	0.306	0.739	1
veil	0.00184285	-0.339075	0.032	0.217	1
Arfip	0.00184839	-0.377684	0.016	0.196	1
CG17636	0.00192729	-0.283421	0.016	0.196	1
zda	0.00192909	-0.266507	0.129	0.413	1
CG15098	0.00195912	-0.313138	0.258	0.609	1
A16	0.0019687	-0.288853	0.048	0.261	1
pcs	0.00212306	-0.348783	0.145	0.413	1
vir-1	0.0021661	-0.337865	0.177	0.5	1
CG32302	0.00732776	-1.83613	0.065	0.239	1
CG12506	0.00332623	-1.79521	0.016	0.174	1
RpL32	0.00235575	-0.251979	0.968	1	1
Syt4	0.00237849	-0.331614	0.161	0.457	1
babos	0.00247287	-0.691878	0.242	0.543	1
Cyp1	0.00247967	0.317151	0.952	0.978	1
Sidpn	0.00249988	-0.270758	0.032	0.217	1
lncRNA:alphagamma-element:CR32865	0.00250631	-0.280308	0.048	0.261	1
Ssdp	0.00252284	-0.316334	0.177	0.478	1
Pdk1	0.00252284	-0.378155	0.177	0.478	1
mthl3	0.00255327	-0.263659	0.081	0.326	1
Ms	0.00255853	0.741186	0.629	0.587	1
Ras64B	0.00259654	-0.358076	0.29	0.674	1
mats	0.0026421	-0.323351	0.097	0.348	1
MtnD	0.00269464	-0.941173	0.032	0.217	1
lncRNA:roX2	0.0027268	-0.397583	0.226	0.522	1
CG10650	0.0027754	-0.31633	0.048	0.261	1
Nph	0.00293337	0.986881	0.629	0.609	1
Jon25Bi	0.00304087	-0.980564	0.129	0.37	1
Ald	0.00310001	0.382188	0.919	0.978	1
CG33521	0.00312088	-0.430749	0.194	0.5	1
scramb2	0.00312524	-0.308719	0.065	0.283	1
parvin	0.00313998	-0.324918	0.129	0.391	1
TMS1	0.00322239	-0.348896	0.145	0.391	1
Vps24	0.00327908	-0.349644	0.177	0.457	1
RpL38	0.00329523	-0.320728	0.984	0.978	1
CG13506	0.00331629	-0.325479	0.177	0.478	1
CG14302	0.0157364	-1.68644	0.129	0.304	1
PNUTS	0.00333157	-0.283278	0.145	0.413	1
CG9568	0.00336508	-0.549066	0.032	0.217	1
lncRNA:CR31781	0.00343672	-0.33376	0.081	0.304	1
Cyp6a9	0.00346788	-0.28267	0.016	0.174	1
Capa	0.00346788	-0.434939	0.016	0.174	1
CG9328	0.00347071	-0.285415	0.226	0.565	1
spidey	0.00351439	-0.268559	0.145	0.435	1
CG43897	0.00354323	-0.305321	0.323	0.652	1
grn	0.00362028	-0.26002	0.032	0.217	1
CG4250	0.00365711	-0.300543	0.177	0.478	1
CG18649	0.15455	-1.67286	0.081	0.174	1
RpL41	0.00367739	-0.272399	1	1	1
Tsp42Ea	0.00368453	-0.300026	0.129	0.391	1
CG15818	0.00369303	-0.264257	0	0.13	1
CG10702	0.00376779	-0.288719	0.016	0.174	1
CG42258	0.00376977	-0.305971	0.21	0.522	1
Kank	0.0038781	-0.41144	0.129	0.37	1
CG13461	0.104529	-1.65368	0.032	0.109	1
CG5346	0.00399046	-0.323828	0.145	0.413	1
stck	0.0040219	-0.41029	0.274	0.587	1
Frq1	0.00404306	-0.536805	0.226	0.5	1
CG9932	0.00412711	-0.282605	0.113	0.348	1
Hsc70-4	0.00418053	0.294558	0.984	0.978	1
CG2017	0.0041909	-0.25786	0.048	0.239	1
Frq2	0.0041909	-0.317308	0.048	0.239	1
CG12105	0.0041909	-0.338052	0.048	0.239	1
RyR	0.00423409	-0.273604	0.081	0.304	1
CG9003	0.00450732	-0.283035	0.065	0.261	1
Rab2	0.00467885	-0.258766	0.306	0.674	1
Gapdh1	0.00483481	0.49246	0.935	0.957	1
LysS	0.00489087	-0.981422	0.081	0.283	1
Fas3	0.00504251	-0.443779	0.242	0.543	1
Rsf1	0.00508889	-0.298199	0.21	0.522	1
SmydA-9	0.0051194	-0.424474	0.032	0.196	1
CG1648	0.0051829	-0.485082	0.597	0.935	1
Nop60B	0.00519259	0.79155	0.581	0.457	1
ND-B14.7	0.00527941	-0.283421	0.371	0.783	1
Asph	0.00542439	-0.370151	0.258	0.543	1
lncRNA:CR43855	0.00543655	-0.297697	0.065	0.261	1
Pax	0.00547538	-0.464065	0.403	0.761	1
kay	0.00553246	-0.254169	0.323	0.652	1
AstA-R2	0.00569614	-0.623682	0.097	0.304	1
CG14135	0.00571129	-0.250963	0.032	0.196	1
Pde9	0.00586101	-0.341516	0.113	0.348	1
RpI1	0.00588998	0.510047	0.194	0.022	1
bt	0.00604023	-0.787216	0.484	0.696	1
CG11796	0.00609083	0.941889	0.194	0.022	1
jp	0.0061055	-0.316463	0.226	0.522	1
mt:ND3	0.00614847	-0.265597	0.242	0.543	1
GstO3	0.00619529	-0.35761	0.113	0.326	1
CG15012	0.00634958	-0.297875	0.387	0.717	1
Zasp66	0.0063539	-0.540082	0.613	0.87	1
La	0.00635535	0.854747	0.484	0.348	1
crb	0.00636421	-0.273586	0.032	0.196	1
CG8629	0.00117459	-1.54053	0.097	0.348	1
flw	0.00664027	-0.506126	0.435	0.739	1
ics	0.00664052	-0.280518	0.339	0.652	1
CG5830	0.00669606	-0.252452	0.177	0.435	1
Prm	0.00675208	-0.269358	0.468	0.761	1
Zasp52	0.00681717	-0.283737	0.226	0.522	1
Csk	0.0069217	-0.326547	0.097	0.304	1
Jra	0.00694914	-0.278172	0.081	0.283	1
wls	0.00702737	-0.270816	0.016	0.152	1
CG13946	0.0179926	-1.51326	0.016	0.13	1
hig	0.00761519	-0.582823	0.113	0.348	1
msb1l	0.00762637	-0.285804	0.016	0.152	1
peng	0.0076649	0.68143	0.274	0.087	1
Klp64D	0.00767832	-0.31861	0.048	0.217	1
Tm2	0.00774801	-0.380243	0.581	0.891	1
Mf	0.007762	-0.519976	0.677	0.87	1
wap	0.00779315	-0.279556	0.065	0.239	1
slow	0.0079427	-0.281197	0.016	0.152	1
CG42673	0.00801792	-0.257292	0.113	0.348	1
Pebp1	0.03005	-1.49914	0.177	0.348	1
ATPsynF	0.00825225	0.30548	0.919	0.891	1
CG14418	0.00827074	-0.35204	0.016	0.152	1
tin	0.0083784	-0.255638	0	0.109	1
CG17047	0.0083784	-0.259714	0	0.109	1
CG13806	0.0083784	-0.308447	0	0.109	1
Drs	0.0083784	-0.447291	0	0.109	1
Cpr49Af	0.0083784	-0.508696	0	0.109	1
Cat	0.00837915	-0.33305	0.097	0.304	1
CG7714	0.27934	-1.499	0.081	0.152	1
CG5023	0.00857642	-0.575001	0.484	0.761	1
Jon65Aiv	0.0209044	-1.45192	0.194	0.391	1
Gel	0.00865295	-0.420694	0.129	0.348	1
Ag5r2	0.0087435	-0.428101	0.048	0.217	1
CG1927	0.00902867	-0.283663	0.226	0.522	1
Mlc1	0.00910032	-0.536158	0.71	0.87	1
ckn	0.00963761	-0.337537	0.065	0.239	1
Mlp60A	0.00983556	-0.525983	0.677	0.935	1
CG10737	0.0100898	-0.310902	0.29	0.565	1
CG7630	0.0101905	0.374742	0.935	0.957	1
Cp110	0.0102595	-0.251475	0.048	0.217	1
MED22	0.0103761	-0.266443	0.097	0.304	1
CG3819	0.0105407	-0.757217	0.065	0.239	1
apt	0.0108148	-0.28724	0.129	0.348	1
nop5	0.0111979	0.917801	0.468	0.348	1
CG32772	0.0112278	-0.25444	0.097	0.304	1
CG10433	0.0114925	-0.411729	0.306	0.543	1
betaggt-II	0.0115144	-0.314967	0.032	0.174	1
r-l	0.0115184	0.560406	0.21	0.043	1
NUCB1	0.0119145	-0.285971	0.226	0.457	1
CG4660	0.012045	0.466086	0.129	0	1
TwdlP	0.012045	0.429886	0.129	0	1
ome	0.0123502	-0.261514	0.032	0.174	1
Ag5r	0.0123502	-0.583208	0.032	0.174	1
MtnE	0.0850335	-1.43814	0.145	0.261	1
sima	0.0126408	-0.278473	0.177	0.435	1
Tsp42El	0.0130534	-0.355125	0.194	0.435	1
CG3348	0.0133274	0.769402	0.21	0.043	1
NPF	0.0133274	0.425638	0.21	0.043	1
COX4	0.0136959	0.359478	0.871	0.913	1
CG13364	0.0137348	0.606352	0.726	0.783	1
CG5903	0.0140282	0.456946	0.661	0.674	1
Oatp74D	0.0140671	-0.377323	0.161	0.391	1
NLaz	0.0148136	-0.7565	0.048	0.196	1
l(2)efl	0.014876	-0.8128	0.177	0.37	1
Nrt	0.0150426	-0.290738	0.161	0.391	1
su(r)	0.0151193	-0.317569	0.097	0.283	1
mRpL12	0.0152239	0.804647	0.565	0.478	1
Pglym78	0.0152779	0.536582	0.774	0.761	1
l(2)05714	0.0152866	-0.284856	0.048	0.196	1
unk	0.0152979	-0.272398	0.242	0.5	1
beat-IIIc	0.0154968	-0.250238	0.129	0.348	1
wupA	0.0155061	-0.50872	0.758	0.913	1
CG10918	0.124543	-1.40048	0.048	0.13	1
Faf2	0.0157492	-0.293645	0.113	0.304	1
CG12213	0.0158263	-0.267682	0.065	0.239	1
Cpr78Cc	0.0160048	0.606252	0.161	0.022	1
CG11089	0.0160048	0.387112	0.161	0.022	1
Mlc2	0.0161928	-0.337362	0.79	0.957	1
CG7655	0.0163822	-0.302273	0.145	0.348	1
Ccz1	0.0166255	-0.267439	0.016	0.13	1
pot	0.0167863	-0.341026	0.048	0.196	1
CG8997	0.0167863	-0.90244	0.048	0.196	1
Obp56a	0.0224797	-1.33414	0.177	0.413	1
sinu	0.0173141	-0.317511	0.048	0.196	1
CG31789	0.00397043	-1.32017	0.065	0.261	1
Usp47	0.0180039	-0.250836	0.161	0.37	1
Nopp140	0.0182032	0.834957	0.355	0.196	1
His3.3B	0.0183333	-0.270907	0.419	0.717	1
CG5177	0.0193778	-0.305446	0.435	0.739	1
CG1461	0.0194572	0.412452	0.113	0	1
ProRS-m	0.0194572	0.36935	0.113	0	1
LysC	0.000707814	-1.30664	0	0.174	1
hth	0.0201122	-0.328327	0.532	0.826	1
Thor	0.020273	-0.392688	0.629	0.935	1
CG34445	0.0203308	-0.310952	0.258	0.522	1
DOR	0.0204723	-0.559776	0.194	0.391	1
obst-E	0.0204949	0.932114	0.242	0.087	1
CG9672	0.0207973	-0.369502	0.048	0.196	1
CG4562	0.0207973	-0.389008	0.048	0.196	1
CG32073	0.110899	-1.30099	0.032	0.109	1
CG34446	0.0209573	-0.377915	0.258	0.5	1
fl(2)d	0.0213132	-0.27421	0.081	0.239	1
CG43349	0.0214337	-0.315181	0.048	0.196	1
Tsp42Eo	0.0224366	-0.388736	0.097	0.261	1
Jon65Aiii	0.0704035	-1.25533	0.242	0.391	1
MtnA	0.0229959	-0.716092	0.419	0.739	1
GlnRS	0.0240807	-0.277899	0.113	0.283	1
UQCR-Q	0.0242336	0.34163	0.871	0.935	1
CG31075	0.0245199	-0.303434	0.032	0.152	1
CG44325	0.0245668	-0.340032	0.532	0.826	1
mod	0.0245738	0.696378	0.565	0.609	1
Tsr1	0.0249571	0.520062	0.21	0.065	1
Sf3a1	0.0253569	-0.27069	0.032	0.152	1
CG8519	0.0253569	-0.277494	0.032	0.152	1
Nop56	0.0255157	0.745053	0.468	0.391	1
UBL3	0.0256057	-0.291348	0.145	0.348	1
deltaTry	0.002333	-1.24191	0.097	0.326	1
sit	0.0261499	0.642622	0.145	0.022	1
CG32564	0.0263885	0.980736	0.306	0.152	1
eIF4H1	0.0265047	0.616192	0.677	0.696	1
mRpL42	0.0266353	0.579523	0.565	0.478	1
CG34305	0.0269927	0.693601	0.145	0.022	1
Cda4	0.0275121	0.561947	0.177	0.043	1
CG6073	0.0278589	0.402222	0.145	0.022	1
CG15043	0.000452462	-1.23813	0.032	0.261	1
pkaap	0.0280179	-0.314542	0.032	0.152	1
DCTN5-p25	0.0284049	-0.278479	0.113	0.283	1
mirr	0.0284049	-0.417206	0.113	0.283	1
UQCR-11	0.028571	0.314733	0.823	0.935	1
UQCR-C2	0.028763	0.39835	0.79	0.87	1
CG1146	0.0289568	-0.264285	0.032	0.152	1
CG5011	0.0291286	-0.350339	0.081	0.239	1
mt:CoIII	0.0291966	-0.282828	0.952	0.978	1
l(2)k09848	0.0299165	0.43531	0.177	0.043	1
yip7	0.112141	-1.19267	0.21	0.326	1
CG5773	0.030604	0.848156	0.339	0.174	1
CG15829	0.0308921	-0.577615	0.097	0.261	1
Act57B	0.0310598	-0.354236	0.806	0.913	1
CG13920	0.0317267	-0.269375	0.306	0.565	1
noc	0.0324993	-0.299419	0.065	0.196	1
eIF2beta	0.0326557	0.573578	0.677	0.804	1
AIF	0.0331927	0.584769	0.226	0.087	1
Bacc	0.0340847	-0.292131	0.871	1	1
CG41128	0.0341966	0.472211	0.677	0.696	1
Pka-C3	0.0347616	-0.37606	0.242	0.435	1
Inx3	0.0354756	-0.342454	0.081	0.217	1
Tom7	0.0362533	0.449017	0.806	0.913	1
shep	0.0373401	0.732382	0.742	0.696	1
Roe1	0.0380253	0.856194	0.323	0.196	1
CHMP2B	0.0382246	-0.266607	0.113	0.283	1
spri	0.0382417	-0.379039	0.065	0.196	1
CG6933	0.0258586	-1.11723	0.113	0.283	1
Bet1	0.0390928	-0.365216	0.097	0.239	1
Surf6	0.0392869	0.682132	0.274	0.13	1
lncRNA:CR45018	0.0403373	-0.278033	0.016	0.109	1
app	0.0409933	0.447752	0.226	0.087	1
LysE	0.00861085	-1.09803	0.016	0.152	1
COX7C	0.0417352	0.303991	0.871	0.913	1
Antp	0.041822	-0.278829	0.129	0.304	1
CG42815	0.043172	0.600546	0.274	0.109	1
Hsp67Bc	0.0434529	0.775665	0.387	0.283	1
Jon99Fi	0.0446213	0.266899	0.242	0.087	1
CG34282	0.0448187	-0.836008	0.048	0.174	1
CG17134	0.779223	-1.0959	0.113	0.13	1
Mp20	0.045321	-0.683698	0.565	0.739	1
CG13323	0.0825445	-1.07967	0.177	0.304	1
Rrp40	0.0456	0.543198	0.242	0.109	1
Tom40	0.0463556	0.735956	0.355	0.239	1
Peritrophin-A	0.04663	0.295057	0.129	0.022	1
srl	0.0466771	0.412671	0.194	0.065	1
CG30423	0.0474362	-0.253435	0.371	0.63	1
kdn	0.0476835	0.747612	0.5	0.413	1
LysB	0.0388723	-1.04883	0.048	0.174	1
CG34278	0.0480774	0.619116	0.129	0.022	1
Act87E	0.00014464	-1.04535	0.355	0.739	1
CG32241	0.0502945	0.855121	0.226	0.087	1
Gpo1	0.0505685	0.664601	0.323	0.196	1
betaTub56D	0.0506997	0.290511	0.952	1	1
CG6937	0.0507927	0.508781	0.242	0.109	1
CG13315	0.0508267	0.589102	0.161	0.043	1
roh	0.0517667	0.269498	0.903	0.957	1
Neb-cGP	0.0528535	0.281554	0.871	0.957	1
nrv3	0.0529261	0.422845	0.694	0.783	1
COX5A	0.0532352	0.333576	0.887	0.935	1
CG4928	0.00225711	-1.03001	0.161	0.413	1
Vha13	0.054617	0.898524	0.855	0.891	1
Pdf	0.0553413	0.581995	0.21	0.087	1
CG9757	0.056786	-0.803519	0.145	0.304	1
QIL1	0.0568391	0.583287	0.565	0.63	1
sls	0.0580225	-0.505405	0.419	0.63	1
mnd	0.0580313	0.812078	0.274	0.152	1
Msp300	0.0585145	0.435453	0.823	0.891	1
CG5028	0.0586482	-0.275266	0.258	0.457	1
CG10910	0.0591896	-0.407518	0.097	0.239	1
Adk1	0.0601558	-0.277499	0.403	0.63	1
CG8545	0.061303	0.284532	0.226	0.087	1
Ts	0.0618765	0.484085	0.21	0.087	1
CG2059	0.0620874	-0.267476	0.048	0.152	1
sqd	0.0627854	0.369935	0.823	0.891	1
CG30195	0.0633055	-0.324742	0.161	0.304	1
CG8664	0.000610789	-1.00262	0.016	0.217	1
SPR	0.0656172	0.41067	0.129	0.304	1
SIFa	0.0684859	0.300387	0.194	0.391	1
RanGAP	0.0687842	0.414027	0.113	0.022	1
CR12628	0.0687842	0.384506	0.113	0.022	1
Rbf	0.0687842	0.382168	0.113	0.022	1
CG1671	0.0687842	0.347908	0.113	0.022	1
obst-A	0.0687842	0.347081	0.113	0.022	1
rept	0.0687842	0.291352	0.113	0.022	1
Cyp9f3	0.0687842	0.285805	0.113	0.022	1
bys	0.0687842	0.265397	0.113	0.022	1
sm	0.0695336	0.291469	0.306	0.609	1
frm	0.356433	1.01723	0.194	0.152	1
Vha55	0.684315	1.02627	0.565	0.761	1
Dop1R1	0.0703581	0.548527	0.177	0.065	1
Hsp83	2.61226e-05	1.03086	0.774	0.652	0.367388
CG4741	0.0705488	0.53328	0.21	0.087	1
Tk	0.0708946	0.346296	0.113	0.022	1
lama	0.0708946	0.260122	0.113	0.022	1
ssp7	0.0710552	0.641002	0.145	0.043	1
Ak6	0.0710552	0.440887	0.145	0.043	1
UQCR-6.4	0.0711866	0.489173	0.742	0.848	1
ND-B22	0.0724772	0.351598	0.774	0.783	1
Chchd2	0.0726298	0.470381	0.661	0.783	1
geminin	0.0727901	0.730672	0.242	0.13	1
CG4753	0.0730579	0.495733	0.113	0.022	1
cype	0.0740021	0.321583	0.935	0.913	1
CG13560	0.59761	1.03491	0.161	0.13	1
Hand	0.0750892	-0.354253	0.194	0.37	1
CG12909	0.0767915	0.330837	0.145	0.043	1
verm	0.0772249	0.465124	0.177	0.065	1
fabp	0.0779509	0.637337	0.661	0.761	1
Muc55B	0.0793497	-0.407015	0.048	0.152	1
aPKC	0.0797171	0.372584	0.161	0.348	1
smt3	0.0798939	0.357347	0.839	0.891	1
bsf	0.0802602	0.526897	0.242	0.13	1
Fib	0.0806047	0.650394	0.516	0.543	1
CG1789	0.0808578	0.265617	0.177	0.065	1
CG7299	0.161579	1.05128	0.371	0.283	1
RFeSP	0.0831593	0.376792	0.823	0.913	1
sesB	0.0835721	0.302568	1	1	1
Xrp1	0.083898	-0.273034	0.468	0.696	1
Egfr	0.0844928	-0.286298	0.065	0.174	1
ACC	0.0846574	0.629507	0.194	0.087	1
Gp210	0.0846574	0.399315	0.194	0.087	1
CG11131	0.691397	1.07075	0.161	0.152	1
l(3)87Df	0.0866747	0.47396	0.242	0.13	1
Cpr47Eb	0.0872252	-0.511094	0.129	0.261	1
Tim8	0.0891857	0.500383	0.484	0.435	1
alrm	0.0919656	0.464308	0.339	0.652	1
ppan	0.0921695	0.363457	0.194	0.087	1
NHP2	0.0923989	0.430315	0.452	0.37	1
Hsc70-5	0.0937274	0.643676	0.468	0.457	1
ND-ACP	0.0945127	0.350476	0.806	0.87	1
kon	0.0946788	-0.266127	0.081	0.196	1
Ggamma30A	0.0947146	0.454761	0.629	0.609	1
COX7A	0.0948354	0.31746	0.823	0.913	1
CG15093	0.0949789	0.598225	0.565	0.63	1
sun	0.0958685	0.384173	0.806	0.891	1
CG1703	0.098275	0.56087	0.258	0.152	1
CG8520	0.100208	0.461153	0.194	0.087	1
Mhc	0.100219	-0.291375	0.661	0.87	1
TrpRS	0.103591	0.580382	0.226	0.13	1
ATPsynD	0.104089	0.270766	0.903	0.913	1
Vha14-1	0.0481907	1.07644	0.742	0.761	1
CG9253	0.104811	0.583217	0.29	0.196	1
CG11350	0.298863	1.07852	0.145	0.087	1
spoon	0.106797	0.611098	0.435	0.37	1
Samtor	0.107282	0.386891	0.161	0.065	1
Hsp60A	0.000149885	1.10841	0.597	0.348	1
CG5958	0.109592	0.481247	0.129	0.043	1
CG32165	0.109592	0.412402	0.129	0.043	1
Gapdh2	0.109601	0.295597	0.903	1	1
lncRNA:CR43264	0.109701	0.436412	0.161	0.065	1
mRpL17	0.110243	0.466878	0.387	0.283	1
mtSSB	0.110321	0.675038	0.306	0.217	1
CG15201	0.110899	-0.327813	0.032	0.109	1
Vha16-1	0.582011	1.11592	0.839	0.913	1
CCT8	0.111716	0.422069	0.516	0.457	1
CG16885	0.119812	1.11672	0.161	0.065	1
CG12480	0.112163	0.542876	0.161	0.065	1
CG8628	0.112163	0.473447	0.161	0.065	1
rost	0.11236	0.515634	0.129	0.043	1
CG34232	0.112534	-0.825471	0.129	0.239	1
RNASEK	0.113127	0.467975	0.79	0.913	1
Hsp26	6.83854e-06	1.12383	0.597	0.196	0.0961773
CG3955	0.115183	0.543821	0.129	0.043	1
kra	0.117328	0.284072	0.71	0.848	1
CG5955	0.118061	0.389937	0.129	0.043	1
Tm1	0.119301	-0.320897	0.823	0.957	1
CG7296	0.993188	1.13229	0.21	0.239	1
CG7839	0.120996	0.282106	0.129	0.043	1
Mdh2	0.121231	0.425754	0.79	0.826	1
Ldh	0.121914	0.719789	0.629	0.826	1
FASN1	0.122308	0.719447	0.226	0.13	1
l(2)09851	0.12245	0.308148	0.161	0.065	1
Pdp1	0.123496	0.435765	0.71	0.761	1
CG16758	0.123987	0.304997	0.129	0.043	1
CG16884	0.0703581	1.13312	0.177	0.065	1
Wnt4	0.124555	0.25017	0.032	0.109	1
Hmgs	0.124754	-0.271113	0.323	0.5	1
RhoGAP102A	0.125134	-0.304653	0.081	0.174	1
vkg	0.125192	0.507161	0.242	0.13	1
TwdlN	0.125214	0.713142	0.194	0.087	1
Dh31	0.125766	0.623717	0.371	0.304	1
Ntf-2	0.12638	0.552937	0.516	0.565	1
CG17278	0.127028	-0.276956	0.177	0.304	1
CG15423	0.127863	0.673281	0.161	0.065	1
Rrp46	0.128027	0.321482	0.21	0.109	1
VhaAC39-1	0.128733	0.88007	0.565	0.609	1
vig2	0.128801	0.419179	0.629	0.696	1
CG11300	0.129136	0.519418	0.29	0.152	1
ND-MLRQ	0.129263	0.288312	0.839	0.957	1
Sox14	0.131858	0.276642	0.032	0.109	1
CG12975	0.1327	0.512987	0.177	0.087	1
CG6712	0.133335	0.453938	0.242	0.152	1
muc	0.1338	0.548191	0.403	0.37	1
TwdlO	0.136188	0.861939	0.226	0.13	1
CG3420	0.136792	0.603525	0.29	0.217	1
CG43797	0.137774	-0.301507	0.048	0.13	1
Pgm	0.13844	0.7103	0.419	0.413	1
Glt	0.140876	0.502695	0.177	0.087	1
Gpdh1	0.142515	0.785796	0.339	0.261	1
Ran	0.144705	0.660442	0.516	0.652	1
SNRPG	0.145201	0.497244	0.468	0.435	1
CG10214	0.146537	0.296821	0.177	0.087	1
CG43774	0.148121	0.817414	0.145	0.065	1
TTLL4A	0.148121	0.285823	0.145	0.065	1
CG17816	0.150243	0.772858	0.258	0.174	1
Muc18B	0.151026	-0.385817	0.113	0.217	1
Nsun2	0.15134	0.279105	0.145	0.065	1
apolpp	0.831619	1.13679	0.21	0.217	1
Fum2	0.154613	0.514727	0.145	0.065	1
pre-rRNA:CR45845	0.155003	0.277271	0.532	0.761	1
lncRNA:CR34335	0.155667	-0.656909	0.919	0.978	1
asrij	0.156588	0.288027	0.21	0.109	1
Tpi	0.157541	0.423143	0.71	0.783	1
Mpcp2	0.16084	0.292079	0.871	0.891	1
l(1)G0156	0.161453	0.528955	0.645	0.717	1
CG7465	0.347632	1.14007	0.242	0.196	1
CG2021	0.162501	0.392084	0.194	0.109	1
Col4a1	0.074348	1.14236	0.274	0.152	1
CG44245	0.163809	-0.327552	0.274	0.413	1
asRNA:CR42860	0.164569	-0.286551	0.097	0.196	1
bond	0.164753	0.347114	0.145	0.065	1
Nup93-1	0.164753	0.280686	0.145	0.065	1
natalisin	0.16547	0.298675	0.194	0.109	1
wds	0.168242	0.377473	0.145	0.065	1
CG14777	0.168479	0.633605	0.194	0.109	1
CG10576	0.168485	0.556754	0.565	0.696	1
CG43085	0.169109	0.428549	0.226	0.413	1
CG13185	0.171476	0.479819	0.113	0.043	1
mRpS17	0.174205	0.575615	0.29	0.217	1
fh	0.175572	0.288821	0.113	0.043	1
CG14667	0.175572	0.2608	0.113	0.043	1
GlyP	0.178548	0.566001	0.516	0.565	1
brat	0.179039	0.285628	0.258	0.478	1
scny	0.179115	0.540602	0.21	0.13	1
CG13390	0.179741	0.315879	0.113	0.043	1
Mtr3	0.179741	0.312452	0.113	0.043	1
Acon	0.18041	0.294719	0.661	0.739	1
Fum1	0.181294	0.570848	0.548	0.565	1
gprs	0.181648	0.277239	0.081	0.174	1
mRpS18A	0.181825	0.652135	0.387	0.37	1
fne	0.182359	0.414036	0.565	0.543	1
Nlp	0.182634	0.53338	0.694	0.848	1
CG2862	0.182894	0.366439	0.565	0.652	1
CG44098	0.183983	0.342766	0.113	0.043	1
Gmd	0.188299	0.342681	0.113	0.043	1
ATPsynO	0.190208	0.287754	0.806	0.913	1
Idh3b	0.190828	0.57559	0.419	0.413	1
CG3756	0.192242	0.390837	0.161	0.087	1
CAH1	0.588497	1.1572	0.355	0.435	1
Act5C	0.198234	0.3772	0.887	0.935	1
brm	0.200865	0.26857	0.194	0.109	1
Stip1	0.201267	0.391126	0.21	0.13	1
Crz	0.202357	0.630115	0.306	0.239	1
CG4679	0.203358	0.379134	0.161	0.087	1
CG1368	0.20483	0.717342	0.258	0.174	1
alphaTub84D	0.205548	0.545197	0.403	0.37	1
Vha68-2	0.162843	1.16826	0.468	0.435	1
Bap55	0.207949	0.299921	0.21	0.13	1
CG3588	0.209641	0.765227	0.226	0.152	1
P32	0.209965	0.761421	0.452	0.478	1
CG15019	0.21043	0.662826	0.468	0.5	1
lark	0.210577	0.254256	0.258	0.457	1
CG8939	0.211025	0.418448	0.161	0.087	1
ND-MWFE	0.214905	0.411659	0.677	0.739	1
SpdS	0.223004	0.455998	0.226	0.152	1
CG15908	0.223777	0.543686	0.177	0.109	1
alphaTry	0.224421	-0.440582	0.194	0.283	1
CG2691	0.225023	0.306528	0.129	0.065	1
mRpL28	0.22593	0.279359	0.323	0.565	1
clu	0.226024	0.575699	0.242	0.174	1
CG11370	0.226981	0.402106	0.161	0.087	1
zyd	0.229579	0.477397	0.129	0.065	1
cac	0.229909	0.489702	0.226	0.152	1
Vha26	0.232348	1.18207	0.597	0.717	1
CG11267	2.06014e-05	1.1911	0.742	0.696	0.289738
mbf1	0.233324	0.643322	0.435	0.478	1
Shmt	0.23448	0.522754	0.274	0.217	1
PyK	0.234596	0.366178	0.71	0.913	1
CG9471	0.23547	0.359508	0.177	0.109	1
bol	0.235773	0.268425	0.29	0.5	1
vtd	0.237443	0.396659	0.194	0.348	1
CG31324	0.240788	0.365926	0.258	0.391	1
Pgi	0.241993	0.468357	0.516	0.522	1
Hsc70Cb	0.242303	0.359325	0.339	0.283	1
CG1636	0.243642	0.390136	0.129	0.065	1
CkIIalpha	0.245881	0.360749	0.468	0.478	1
CG1371	0.247679	0.5526	0.258	0.196	1
Echs1	0.247926	0.451503	0.516	0.565	1
Vha100-4	0.0535863	1.20109	0.161	0.043	1
CG17029	0.248461	0.312649	0.129	0.065	1
IA-2	0.248734	0.372274	0.5	0.783	1
Tom20	0.2492	0.311571	0.597	0.761	1
Cul1	0.251533	0.444631	0.226	0.152	1
CG7006	0.251726	0.365015	0.177	0.109	1
Alr	0.253346	0.26278	0.129	0.065	1
Baldspot	0.253522	0.556657	0.355	0.326	1
CG17896	0.254688	0.450668	0.5	0.587	1
CG10953	0.255909	0.485735	0.177	0.109	1
mge	0.256115	0.625526	0.435	0.435	1
Ubqn	0.256439	0.453804	0.29	0.239	1
Bsg	0.257198	0.292439	0.677	0.696	1
lncRNA:CR40469	0.257567	-0.311753	0.274	0.391	1
beat-IIa	0.258298	0.523424	0.129	0.065	1
serp	0.258298	0.259273	0.129	0.065	1
Cpr49Ag	0.259255	0.484102	0.129	0.239	1
CG7290	0.341417	1.21694	0.113	0.065	1
CG14421	0.265979	-0.284452	0.097	0.174	1
rad	0.269319	0.760888	0.323	0.283	1
CG31446	0.104905	1.22377	0.161	0.065	1
prc	0.273087	0.818599	0.194	0.13	1
CG2781	0.273124	0.415797	0.177	0.109	1
CG2658	0.273124	0.251733	0.177	0.109	1
loh	0.273555	0.258637	0.129	0.065	1
CG1622	0.274024	0.343813	0.145	0.087	1
VhaSFD	0.277503	0.713917	0.484	0.522	1
CG3702	0.278875	0.509048	0.145	0.087	1
CG8177	0.115117	1.33547	0.323	0.239	1
Vha44	0.282811	0.828372	0.532	0.652	1
SCAP	0.283785	0.460193	0.145	0.087	1
CG33506	0.284432	0.261069	0.081	0.152	1
para	0.284463	0.281891	0.242	0.391	1
ATPCL	0.287703	0.309788	0.21	0.348	1
aay	0.288753	0.379758	0.145	0.087	1
Der-1	0.290195	0.376655	0.194	0.13	1
Cpr67B	0.291114	0.338751	0.177	0.109	1
bor	0.29133	0.468325	0.29	0.239	1
CG5114	0.293778	0.332114	0.145	0.087	1
Nurf-38	0.294535	0.44166	0.565	0.609	1
Cpr11A	0.295733	0.410439	0.177	0.109	1
msk	0.29597	0.686102	0.355	0.348	1
CG34200	0.297991	0.510931	0.516	0.587	1
CG13731	0.0700481	1.35096	0.226	0.109	1
CG16787	0.298863	0.285443	0.145	0.087	1
CG11811	0.29893	0.495867	0.306	0.261	1
Pen	0.30349	0.497481	0.194	0.13	1
CG4302	0.30349	0.366949	0.194	0.13	1
CG9034	0.308042	0.399499	0.613	0.739	1
alphaCOP	0.309612	0.464441	0.242	0.196	1
rump	0.30992	0.275745	0.21	0.348	1
CCT4	0.314298	0.472549	0.484	0.522	1
CG6178	0.314466	0.255568	0.145	0.087	1
Vha36-1	0.314817	0.504459	0.613	0.717	1
Acn	0.315054	0.30403	0.177	0.304	1
Pfdn5	0.316176	0.533273	0.468	0.565	1
CG8237	0.316299	0.321969	0.081	0.152	1
CG8149	0.319121	0.278072	0.177	0.304	1
VhaAC45	0.320962	0.832875	0.629	0.696	1
CG7675	0.321837	0.278551	0.194	0.13	1
CG33128	0.326534	0.858972	0.194	0.13	1
P5cr	0.328804	0.281938	0.161	0.109	1
ND-ASHI	0.329481	0.336904	0.613	0.696	1
Phf5a	0.332693	0.42871	0.306	0.261	1
CG13220	0.335007	0.295835	0.339	0.565	1
unc80	0.335184	0.366934	0.113	0.065	1
CCT7	0.335723	0.315308	0.484	0.543	1
Jafrac1	0.339587	0.402959	0.629	0.783	1
CG6180	0.340045	0.38802	0.274	0.457	1
Sf3a2	0.340893	0.255991	0.129	0.217	1
CG32603	0.0449299	1.44801	0.226	0.087	1
CG5770	0.341417	0.553466	0.113	0.065	1
CG3246	0.341417	0.428643	0.113	0.065	1
CG7322	0.341417	0.399528	0.113	0.065	1
RhoGAP18B	0.341417	0.29756	0.113	0.065	1
Ahcy	0.342556	0.470276	0.484	0.587	1
wdp	0.344229	0.593855	0.177	0.13	1
ND-51	0.344231	0.330024	0.565	0.63	1
nonA	0.345767	0.255236	0.129	0.217	1
CG10598	0.205764	1.48882	0.258	0.196	1
RfC38	0.347724	0.292936	0.113	0.065	1
Droj2	0.348055	0.558028	0.403	0.457	1
CG15515	0.34969	0.584872	0.161	0.109	1
woc	0.351568	0.3656	0.226	0.174	1
Crk	0.35217	0.293155	0.339	0.304	1
7B2	0.352462	0.463696	0.516	0.587	1
Uhg2	0.353518	0.253957	0.21	0.348	1
CG10424	0.354104	0.359953	0.113	0.065	1
CG6724	0.354322	0.418303	0.177	0.13	1
CG3714	0.35504	0.345104	0.161	0.109	1
Mccc1	0.35504	0.260408	0.161	0.109	1
jeb	0.355138	0.661823	0.29	0.261	1
CG5767	0.0279035	1.51079	0.274	0.109	1
prtp	0.359384	0.275297	0.258	0.391	1
CSN5	0.359438	0.451659	0.177	0.13	1
Hrb27C	0.360069	0.359698	0.71	0.87	1
28SrRNA-Psi:CR45859	0.360232	0.416127	0.113	0.196	1
thetaTry	0.360558	0.449194	0.113	0.065	1
CG31224	0.360558	0.297663	0.113	0.065	1
CG2865	0.36061	0.327291	0.355	0.326	1
kirre	0.360939	0.389104	0.177	0.283	1
ND-30	0.362585	0.398671	0.548	0.652	1
zld	0.364639	0.276828	0.323	0.283	1
CG42813	0.364693	0.314836	0.226	0.37	1
slmo	0.366092	0.556419	0.21	0.174	1
rib	0.367085	0.292351	0.113	0.065	1
Clbn	0.367085	0.277166	0.113	0.065	1
Ank2	0.368411	0.424481	0.355	0.348	1
CG40198	0.373685	0.384518	0.113	0.065	1
yps	0.377083	0.333067	0.5	0.543	1
CG15422	0.380361	0.647433	0.177	0.13	1
Caf1-55	0.380361	0.315748	0.177	0.13	1
ERp60	0.380509	0.305234	0.484	0.5	1
Ythdf	0.381124	0.427149	0.129	0.217	1
Ubr1	0.381371	0.397053	0.194	0.152	1
Pgant5	0.38256	0.273975	0.161	0.109	1
Ggamma1	0.382644	0.284914	0.629	0.783	1
mRpL18	0.383791	0.457812	0.274	0.239	1
kek1	0.38821	0.341005	0.21	0.326	1
CG9344	0.392297	0.298331	0.29	0.413	1
beat-IIIb	0.393923	0.310557	0.113	0.065	1
CG3209	0.394218	0.258104	0.226	0.37	1
Dscam2	0.394221	0.423161	0.097	0.152	1
Larp4B	0.395647	0.289746	0.242	0.391	1
l(2)tid	0.395749	0.458251	0.258	0.217	1
CG2875	0.396236	0.402909	0.129	0.087	1
mbm	0.396236	0.364045	0.129	0.087	1
CG17544	0.396236	0.30845	0.129	0.087	1
Rbcn-3A	0.396836	0.348707	0.194	0.152	1
CG5065	0.399087	0.353005	0.161	0.261	1
B52	0.399897	0.403443	0.532	0.652	1
mei-P26	0.400241	0.674431	0.355	0.348	1
Sms	0.401972	0.422684	0.29	0.261	1
nclb	0.40232	0.436658	0.226	0.196	1
CG6404	0.402607	0.390798	0.129	0.087	1
SmD2	0.40308	0.444249	0.419	0.478	1
Inos	0.403406	0.281056	0.29	0.478	1
CG4045	0.404012	0.285812	0.145	0.239	1
Clect27	0.407214	0.886098	0.226	0.196	1
ScsbetaG	0.407353	0.415728	0.194	0.152	1
CG31673	0.409038	0.429207	0.129	0.087	1
CG9799	0.409038	0.379405	0.129	0.087	1
CG14629	0.409038	0.293701	0.129	0.087	1
nero	0.413116	0.337948	0.177	0.13	1
NiPp1	0.415531	0.289153	0.129	0.087	1
Lim1	0.415531	0.255086	0.129	0.087	1
CG8726	0.417296	0.307052	0.177	0.283	1
PH4alphaEFB	0.418733	0.337727	0.177	0.13	1
CG12310	0.418901	-0.844822	0.226	0.326	1
EMC8-9	0.419199	0.288977	0.194	0.304	1
Nckx30C	0.420882	0.597611	0.21	0.174	1
p38b	0.420882	0.50913	0.21	0.174	1
CG3939	0.420882	0.287278	0.21	0.174	1
hebe	0.421563	0.784667	0.306	0.304	1
CG8661	0.422216	0.807892	0.177	0.283	1
beta-PheRS	0.423436	0.383287	0.194	0.152	1
Hsc70-3	0.423527	0.359061	0.581	0.696	1
CG9107	0.424395	0.299613	0.177	0.13	1
Sep2	0.427283	0.38454	0.274	0.457	1
CG9485	0.428696	0.328798	0.129	0.087	1
CG1607	0.429676	0.61468	0.29	0.283	1
SmF	0.429676	0.528252	0.29	0.283	1
dUTPase	0.43025	0.641999	0.323	0.348	1
CG3902	0.430382	0.455493	0.387	0.391	1
ND-B14	0.431691	0.264272	0.581	0.63	1
CG13230	0.431716	-0.258103	0.226	0.304	1
dlg1	0.433126	0.257824	0.548	0.565	1
Prx3	0.434354	0.437253	0.371	0.37	1
tsu	0.434354	0.364928	0.371	0.37	1
Pitslre	0.434844	0.358555	0.258	0.413	1
CG8671	0.434946	0.264619	0.258	0.391	1
Dak1	0.434969	0.507502	0.403	0.435	1
Pngl	0.435369	0.343318	0.129	0.087	1
CG4908	0.435369	0.279977	0.129	0.087	1
CG3940	0.435852	0.288845	0.177	0.13	1
CG34132	0.443734	0.414809	0.5	0.587	1
Mgstl	0.444868	0.468568	0.258	0.239	1
Men	0.445174	0.48764	0.468	0.5	1
Syx1A	0.446915	0.287444	0.548	0.761	1
shi	0.448745	0.51752	0.387	0.435	1
l(2)37Cc	0.449882	0.49815	0.5	0.652	1
Trf4-1	0.452693	0.322207	0.21	0.174	1
CG42540	0.452834	0.275577	0.177	0.261	1
CG8132	0.456194	0.289994	0.145	0.109	1
CG1824	0.456695	0.298807	0.194	0.152	1
Appl	0.457102	0.355364	0.371	0.565	1
Sec61beta	0.45946	0.356283	0.565	0.717	1
Npc2a	0.459955	0.846196	0.306	0.283	1
nej	0.462248	0.265542	0.258	0.37	1
MRP	0.462377	0.28097	0.194	0.152	1
AdSL	0.463591	0.317309	0.21	0.174	1
Faa	0.464742	0.282349	0.097	0.152	1
CG10565	0.46619	0.46592	0.274	0.261	1
DnaJ-1	0.468099	0.316608	0.145	0.217	1
CG2680	0.469164	0.345786	0.145	0.109	1
Rab6	0.469357	0.29336	0.242	0.37	1
Dhit	0.471225	0.294209	0.355	0.543	1
hoe1	0.472222	0.481635	0.161	0.13	1
Atpalpha	0.473745	0.511003	0.677	0.87	1
CG14817	0.475776	0.476946	0.387	0.413	1
mRpL47	0.47593	0.53863	0.323	0.304	1
Fst	0.476346	-0.382668	0.258	0.304	1
CG46301	0.477328	0.339301	0.129	0.196	1
elm	0.477678	0.429316	0.371	0.37	1
Obp99a	0.478153	0.46416	0.548	0.674	1
stai	0.481686	0.345728	0.274	0.413	1
CG12926	0.482336	0.350147	0.145	0.109	1
E(Pc)	0.482336	0.2793	0.145	0.109	1
Sema1a	0.484783	0.542417	0.258	0.239	1
CG11686	0.484783	0.360962	0.21	0.304	1
CCT1	0.485528	0.371786	0.403	0.435	1
smal	0.488997	0.308915	0.145	0.109	1
CTPsyn	0.488997	0.254978	0.145	0.109	1
plum	0.490903	0.446601	0.226	0.326	1
CG32103	0.4957	0.259438	0.177	0.261	1
mbo	0.495707	0.306224	0.145	0.109	1
CG14613	0.496755	0.474362	0.177	0.152	1
RhoGAP100F	0.499518	0.399152	0.194	0.304	1
CG2970	0.500925	0.319049	0.29	0.283	1
mmd	0.502862	0.360742	0.21	0.174	1
CG11030	0.503752	0.383793	0.161	0.13	1
Nup75	0.505986	0.277291	0.097	0.152	1
mRpS2	0.506066	0.270974	0.226	0.348	1
Dp	0.508443	0.394194	0.21	0.326	1
CG13954	0.510189	0.335001	0.161	0.13	1
CG4502	0.511706	0.340687	0.113	0.174	1
mRpL55	0.512275	0.390701	0.419	0.457	1
CG5399	0.513628	0.431427	0.274	0.239	1
CG3638	0.516127	0.327383	0.145	0.109	1
Dhpr	0.517962	0.436219	0.194	0.174	1
CG14210	0.518608	0.276022	0.371	0.37	1
Arf79F	0.519063	0.377057	0.613	0.761	1
CG1416	0.52093	0.372922	0.29	0.283	1
Rcc1	0.521317	0.370517	0.177	0.152	1
betaCOP	0.521318	0.259156	0.145	0.217	1
Cdc42	0.521465	0.329015	0.226	0.326	1
CG43222	0.525995	0.349093	0.29	0.283	1
tyf	0.525995	0.270991	0.242	0.348	1
Sam-S	0.526227	0.373293	0.516	0.696	1
dod	0.526652	0.253372	0.226	0.326	1
mav	0.529754	0.347769	0.161	0.13	1
CG11779	0.529754	0.289908	0.161	0.13	1
Cchl	0.531189	0.307721	0.452	0.522	1
qkr58E-2	0.533553	0.305925	0.145	0.217	1
Dscam1	0.533847	0.258254	0.194	0.283	1
vig	0.53479	0.465406	0.468	0.609	1
CG9286	0.536359	0.279078	0.161	0.13	1
Nfs1	0.536515	0.40524	0.21	0.196	1
CSN7	0.537104	0.286412	0.226	0.326	1
PCB	0.537549	0.267958	0.274	0.391	1
Ilp5	0.539725	0.293866	0.145	0.217	1
AstA	0.543006	0.331914	0.161	0.13	1
CG11583	0.543823	0.434567	0.161	0.239	1
CG43729	0.546023	0.517431	0.355	0.522	1
Myc	0.546154	0.45993	0.452	0.543	1
Gip	0.5464	0.328896	0.177	0.261	1
Tet	0.547758	0.348424	0.194	0.283	1
CG12811	0.549998	0.319855	0.113	0.087	1
CG5787	0.549998	0.316254	0.113	0.087	1
CG7966	0.549998	0.267709	0.113	0.087	1
MFS3	0.550113	0.447061	0.323	0.478	1
Spn27A	0.551106	0.29882	0.145	0.109	1
Jon74E	0.551106	-0.316122	0.113	0.152	1
Con	0.552188	0.256672	0.177	0.261	1
Dic1	0.552443	0.373407	0.323	0.326	1
ras	0.555047	0.537966	0.274	0.283	1
Manf	0.557418	0.293094	0.419	0.457	1
bma	0.557925	0.417006	0.113	0.087	1
CG9135	0.558006	0.38141	0.177	0.261	1
Naa15-16	0.558781	0.397758	0.258	0.261	1
Fdh	0.562037	0.464562	0.419	0.457	1
cpo	0.562037	0.345149	0.355	0.543	1
CG42709	0.563189	0.250605	0.161	0.13	1
CG4341	0.565908	0.322759	0.113	0.087	1
CG9368	0.565908	0.304069	0.113	0.087	1
CG4825	0.565908	0.291697	0.113	0.087	1
CG7637	0.566491	0.60247	0.355	0.413	1
Su(var)205	0.566987	0.265513	0.339	0.5	1
ND-AGGG	0.567375	0.320364	0.565	0.696	1
Uhg1	0.569075	0.340888	0.226	0.326	1
mRpL41	0.569075	0.31578	0.226	0.326	1
mEFTs	0.572781	0.486355	0.194	0.174	1
CG11076	0.573165	0.65304	0.242	0.239	1
CG31030	0.57352	0.466634	0.274	0.413	1
Lon	0.573944	0.395761	0.113	0.087	1
Mipp1	0.575994	0.321915	0.194	0.261	1
SsRbeta	0.576472	0.361196	0.387	0.413	1
bel	0.577529	0.467293	0.468	0.587	1
CG8157	0.577892	0.654518	0.613	0.848	1
SF2	0.578016	0.361665	0.419	0.478	1
ND-B15	0.580025	0.353227	0.532	0.674	1
Tlk	0.581277	0.344189	0.339	0.478	1
CG9947	0.581854	0.380394	0.194	0.283	1
hoip	1.28337e-06	1.55784	0.613	0.261	0.0180493
CG14688	0.582035	0.363619	0.113	0.087	1
CG12355	0.582035	0.32814	0.113	0.087	1
eIF4G1	0.583519	0.361429	0.435	0.522	1
CRIF	0.585394	0.391368	0.274	0.261	1
mRpS23	0.585394	0.344327	0.226	0.326	1
mRpS16	0.586101	0.390858	0.387	0.413	1
CG30457	0.23128	1.69853	0.274	0.217	1
Cyt-c1	0.588925	0.303979	0.71	0.87	1
Gat	0.592091	0.843364	0.355	0.565	1
CG6195	0.592686	0.534584	0.29	0.304	1
Dbi	0.592789	0.279424	0.403	0.565	1
Lcp65Ag3	0.270975	1.99283	0.323	0.283	1
CG14721	0.598373	0.383895	0.113	0.087	1
CG6024	0.598373	0.361384	0.113	0.087	1
Prosbeta6	0.600315	0.257001	0.355	0.5	1
Tudor-SN	0.600684	0.46077	0.371	0.435	1
Nup358	0.601541	0.356784	0.129	0.109	1
mask	0.601573	0.421197	0.323	0.348	1
CG12404	0.601691	0.350248	0.242	0.239	1
mRpL9	0.601927	0.326768	0.226	0.326	1
Aps	0.603489	0.484779	0.274	0.283	1
CG7627	0.60662	0.259812	0.113	0.087	1
CG4866	0.607472	0.344418	0.242	0.239	1
CG33051	0.609216	0.444113	0.129	0.109	1
CG17776	0.610442	0.362353	0.339	0.391	1
CG6028	0.610654	0.535515	0.323	0.457	1
jus	0.610795	0.282854	0.194	0.174	1
CG12099	0.610795	0.261187	0.194	0.174	1
mRpS29	0.610795	0.256909	0.161	0.217	1
ND-B14.5A	0.612595	0.392694	0.548	0.63	1
kcc	0.613064	0.363436	0.226	0.326	1
AstC	0.613278	0.396012	0.242	0.239	1
CG17683	0.614751	0.344383	0.21	0.196	1
Ref1	0.61519	0.260892	0.339	0.5	1
Indy	0.62371	0.287768	0.194	0.174	1
PlexA	0.62371	0.279745	0.161	0.217	1
SmD3	0.624151	0.405841	0.419	0.522	1
CG13321	0.624292	0.512048	0.274	0.261	1
tko	0.624666	0.484561	0.387	0.457	1
Rpb5	0.624962	0.302346	0.242	0.239	1
Pka-C1	0.629107	0.447404	0.403	0.457	1
Rab27	0.631356	0.384108	0.258	0.261	1
atms	0.632499	0.258399	0.129	0.109	1
Tim9a	0.635331	0.330104	0.323	0.5	1
Xbp1	0.635414	0.257446	0.468	0.739	1
HnRNP-K	0.636742	0.366909	0.242	0.239	1
Tsp66E	0.637837	0.268615	0.339	0.478	1
Surf4	0.638333	0.393388	0.403	0.478	1
Ns1	0.640343	0.261267	0.129	0.109	1
lncRNA:CR31451	0.640919	0.508652	0.355	0.413	1
x16	0.641298	0.326661	0.226	0.326	1
Pgk	0.643157	0.515981	0.548	0.717	1
CG6329	0.643741	0.276131	0.306	0.435	1
CG5599	0.645911	0.442698	0.145	0.196	1
UQCR-C1	0.646324	0.256356	0.71	0.891	1
Frl	0.646356	0.29461	0.306	0.413	1
CG31098	0.648228	0.304872	0.129	0.109	1
CG17691	0.651316	0.259611	0.355	0.522	1
CG42307	0.656152	0.322472	0.129	0.109	1
HisRS	0.656577	0.50186	0.306	0.348	1
CG42361	0.660533	0.304073	0.145	0.13	1
CG34291	0.661191	0.286003	0.226	0.196	1
CG9281	0.661436	0.281549	0.323	0.457	1
CG3040	0.661855	0.3107	0.129	0.174	1
CG7054	0.662717	0.46506	0.161	0.152	1
zfh2	0.666661	0.551655	0.145	0.196	1
CG15168	0.667209	0.336626	0.306	0.326	1
CG31126	0.669242	0.454458	0.29	0.304	1
fred	0.669359	0.535386	0.097	0.13	1
eIF5	0.67087	0.368591	0.242	0.326	1
sel	0.671687	0.274708	0.177	0.239	1
CG34117	0.672025	0.300979	0.226	0.304	1
ND-23	0.672422	0.252159	0.468	0.674	1
Usp14	0.67256	0.250767	0.194	0.261	1
brp	0.673636	0.267834	0.145	0.196	1
CG13044	0.67491	-0.87972	0.226	0.174	1
Bka	0.676998	0.441789	0.161	0.152	1
Rpn8	0.678004	0.367533	0.258	0.37	1
CG12034	0.678037	0.287275	0.113	0.152	1
cmpy	0.683144	0.362375	0.145	0.13	1
Lcp65Ag2	0.00647199	2.00475	0.371	0.152	1
Corin	0.686027	0.273757	0.097	0.13	1
mEFTu1	0.687443	0.34039	0.355	0.413	1
Thiolase	0.688383	0.358887	0.306	0.435	1
CG11180	0.691113	0.382168	0.177	0.239	1
CG14270	0.691266	0.330443	0.129	0.174	1
Lcp65Ag1	0.0197487	2.18153	0.274	0.109	1
mRpL44	0.69181	0.335254	0.258	0.348	1
babo	0.693689	0.28651	0.113	0.152	1
Stt3A	0.697621	0.349138	0.177	0.174	1
Nlg3	0.697635	0.266109	0.21	0.196	1
CG10638	0.698379	0.345344	0.145	0.13	1
lwr	0.702522	0.469593	0.516	0.717	1
VhaPPA1-1	0.702756	0.751724	0.484	0.696	1
Sec61alpha	0.702757	0.303684	0.5	0.674	1
GstE9	0.702848	0.351429	0.097	0.13	1
Pcd	0.703229	0.4628	0.355	0.413	1
CG8635	0.705272	0.316138	0.355	0.5	1
scf	0.705901	0.575246	0.274	0.304	1
Pect	0.705909	0.380101	0.161	0.152	1
gish	0.708393	0.368199	0.29	0.391	1
GluRIB	0.708923	0.322488	0.145	0.196	1
CG31937	0.70927	0.302571	0.242	0.239	1
mRpL13	0.711481	0.268583	0.242	0.326	1
DENR	0.71177	0.37685	0.29	0.326	1
CG6610	0.716058	0.252005	0.145	0.196	1
Gyg	0.716702	0.258453	0.194	0.261	1
Uch	0.717189	0.306171	0.161	0.217	1
Gyf	0.717528	0.309619	0.29	0.304	1
ZnT63C	0.720528	0.359182	0.161	0.152	1
Lcch3	0.721151	0.376259	0.129	0.174	1
nAChRalpha6	0.721441	0.550314	0.435	0.478	1
CG9231	0.722929	0.319289	0.306	0.326	1
Rok	0.724052	0.348234	0.161	0.217	1
CG11137	0.727954	0.26247	0.323	0.435	1
NP15.6	0.72888	0.275376	0.532	0.696	1
CG10628	0.729211	0.342038	0.145	0.13	1
cora	0.729823	0.337501	0.323	0.457	1
Irp-1B	0.730938	0.426225	0.161	0.217	1
Smr	0.732445	0.406883	0.565	0.696	1
SCOT	0.734086	0.26709	0.21	0.283	1
Pkc53E	0.734838	0.43078	0.226	0.304	1
CG12173	0.735014	0.29713	0.242	0.304	1
lace	0.73525	0.352432	0.161	0.152	1
CG4627	0.736258	0.308777	0.129	0.174	1
CNPYb	0.736925	0.32444	0.097	0.13	1
Sytbeta	0.73699	0.286495	0.145	0.13	1
CG7564	0.738684	0.270944	0.081	0.109	1
mor	0.738684	0.268663	0.081	0.109	1
Aldh	0.739064	0.357392	0.484	0.696	1
Sh	0.739289	0.441863	0.387	0.5	1
CG44422	0.739822	0.405469	0.226	0.239	1
ATP6AP2	0.741543	0.720867	0.548	0.696	1
mRpS10	0.741719	0.30132	0.29	0.391	1
CG5390	0.742648	0.30635	0.161	0.152	1
Cnx99A	0.743847	0.275967	0.339	0.348	1
CG6769	0.743891	0.27981	0.21	0.196	1
trv	0.745124	0.267045	0.29	0.37	1
lncRNA:Hsromega	0.745599	0.281006	0.726	0.891	1
grp	0.746601	0.258775	0.21	0.283	1
Fitm	0.746697	0.34207	0.177	0.174	1
mRpL36	0.74696	0.412194	0.242	0.326	1
Srp14	0.747784	0.31133	0.306	0.435	1
CG5946	0.748625	0.423842	0.339	0.37	1
nAChRalpha1	0.74953	0.610545	0.194	0.196	1
CG30172	0.74955	0.288869	0.613	0.761	1
Inx2	0.751419	0.373838	0.21	0.217	1
Pka-R1	0.759894	0.383216	0.339	0.478	1
His2Av	0.760448	0.283178	0.532	0.696	1
mRpS35	0.760919	0.267627	0.177	0.174	1
kud	0.769146	0.424087	0.355	0.435	1
heph	0.769783	0.564793	0.339	0.391	1
mRpS33	0.769783	0.518498	0.339	0.391	1
Jon99Cii	0.770803	-0.347693	0.129	0.109	1
CG7394	0.771759	0.336226	0.242	0.261	1
PhKgamma	0.771776	0.526124	0.226	0.239	1
Hrb87F	0.771779	0.354567	0.323	0.37	1
nmo	0.774688	0.502616	0.355	0.478	1
dbe	0.775223	0.294616	0.177	0.174	1
TyrRS	0.776381	0.271927	0.306	0.413	1
AlaRS	0.776958	0.260988	0.194	0.196	1
cpx	0.777266	0.407817	0.371	0.413	1
CG13096	0.777902	0.3533	0.21	0.217	1
Txl	0.778018	0.331531	0.242	0.261	1
CG8498	0.778567	0.339732	0.468	0.565	1
Cpr65Ax2	0.00366079	2.21018	0.21	0.022	1
fbp	0.779295	0.317794	0.323	0.326	1
RpII18	0.781088	0.28124	0.371	0.522	1
Srp19	0.781217	0.278294	0.29	0.391	1
eIF5B	0.781968	0.272554	0.306	0.413	1
CG15765	0.78386	0.315335	0.194	0.196	1
ND-75	0.78746	0.345214	0.419	0.478	1
hang	0.787514	0.319715	0.161	0.152	1
Csl4	0.790779	0.289105	0.194	0.196	1
SRPK	0.791243	0.300477	0.21	0.217	1
Ttd14	0.793176	0.306403	0.339	0.37	1
CG14075	0.793391	0.463526	0.113	0.109	1
san	0.795099	0.32027	0.242	0.326	1
mRpL21	0.797624	0.436904	0.226	0.239	1
Idh	0.798498	0.266911	0.403	0.457	1
eRF3	0.798563	0.297121	0.29	0.326	1
CG6094	0.804057	0.251889	0.177	0.174	1
lig	0.804122	0.316527	0.226	0.239	1
REG	0.804231	0.396729	0.371	0.565	1
Pka-R2	0.804452	0.268387	0.274	0.348	1
mRpL14	0.810353	0.284497	0.274	0.348	1
Atx2	0.810634	0.36568	0.21	0.261	1
CG10585	0.811	0.350884	0.113	0.109	1
GstE6	0.811633	0.306644	0.194	0.196	1
px	0.811633	0.274996	0.194	0.196	1
SmD1	0.81426	0.329711	0.258	0.283	1
mRpL34	0.818105	0.405459	0.21	0.217	1
Obp83g	0.818977	0.700579	0.129	0.13	1
CG8907	0.818977	0.483157	0.129	0.13	1
bru3	0.819322	0.379574	0.516	0.696	1
CG12121	0.819842	0.324042	0.113	0.109	1
mRpL30	0.819939	0.33476	0.323	0.413	1
Cbp20	0.822208	0.257417	0.226	0.283	1
rdgA	0.822538	0.534834	0.258	0.304	1
TSG101	0.823696	0.305273	0.21	0.261	1
CG13928	0.827052	0.291773	0.323	0.348	1
jdp	0.829096	0.34576	0.452	0.565	1
Cpr47Eg	0.00808501	2.27126	0.274	0.087	1
Gp93	0.834059	0.273091	0.274	0.348	1
CG5885	0.83491	0.252973	0.468	0.565	1
bnb	0.835563	0.401579	0.129	0.13	1
mRpL27	0.837176	0.267538	0.29	0.37	1
CG5969	0.84133	0.323211	0.242	0.261	1
eIF6	0.841383	0.323571	0.274	0.326	1
CG15282	0.844507	0.27703	0.306	0.326	1
Fs(2)Ket	0.845183	0.309963	0.194	0.239	1
ClC-c	0.845183	0.252411	0.194	0.239	1
CG7339	0.8465	0.268293	0.113	0.109	1
Sec31	0.846682	0.258642	0.177	0.217	1
CG5037	0.8478	0.322682	0.161	0.196	1
egh	0.849261	0.422755	0.323	0.435	1
norpA	0.849433	0.449829	0.194	0.217	1
Set	0.851543	0.34341	0.258	0.283	1
CG2918	0.85194	0.433008	0.29	0.326	1
mRpL51	0.85194	0.259799	0.29	0.326	1
Ten-a	0.852921	0.439417	0.516	0.609	1
Gabat	0.854489	0.424548	0.435	0.565	1
nolo	0.855427	0.266345	0.113	0.109	1
CG42340	0.855427	0.260033	0.113	0.109	1
Hydr2	0.856111	0.313835	0.145	0.174	1
prim	0.856388	0.262656	0.145	0.152	1
cwo	0.856558	0.297793	0.21	0.261	1
CG10932	0.857228	0.305588	0.323	0.37	1
Pfdn6	0.858514	0.398383	0.403	0.565	1
LeuRS	0.858793	0.452312	0.194	0.239	1
Sod1	0.858818	0.352308	0.565	0.761	1
CSN6	0.859446	0.454845	0.161	0.174	1
SerRS	0.859482	0.349961	0.274	0.326	1
CG14321	0.860579	0.276286	0.129	0.13	1
bbc	0.860791	0.440272	0.177	0.217	1
S6k	0.86144	0.333037	0.355	0.478	1
pan	0.863335	0.336487	0.355	0.457	1
Gk2	0.86381	0.276433	0.145	0.174	1
Pabp2	0.864049	0.378224	0.242	0.304	1
Eglp4	0.866971	0.369766	0.242	0.261	1
l(2)37Cg	0.867862	0.300328	0.177	0.217	1
RpII33	0.86895	0.331716	0.129	0.13	1
CG32164	0.86895	0.312587	0.129	0.13	1
Snap24	0.86895	0.278359	0.129	0.13	1
CG10863	0.869776	0.277864	0.21	0.261	1
Got2	0.870213	0.452433	0.435	0.565	1
mRpL43	0.873404	0.286734	0.226	0.283	1
CG7920	0.875466	0.283068	0.435	0.565	1
Mitofilin	0.875898	0.285857	0.274	0.348	1
CR41597	0.877103	0.400946	0.29	0.348	1
Spase22-23	0.877928	0.286188	0.355	0.478	1
RnpS1	0.878039	0.405025	0.258	0.304	1
ND-B17.2	0.878856	0.301278	0.468	0.696	1
Paics	0.880124	0.303808	0.145	0.152	1
CG42750	0.880893	0.531093	0.129	0.152	1
ttm50	0.883031	0.394569	0.226	0.239	1
CCT2	0.884472	0.307693	0.419	0.522	1
bonsai	0.885545	0.276079	0.258	0.326	1
Tsp42Ec	0.885735	0.397379	0.129	0.13	1
e(y)2	0.886984	0.287699	0.145	0.174	1
Syngr	0.888062	0.29266	0.145	0.152	1
ND-B17	0.890237	0.261611	0.5	0.739	1
CG7191	0.891308	0.271945	0.113	0.109	1
Rpb12	0.891692	0.298997	0.274	0.304	1
CG11279	0.893942	0.418614	0.274	0.348	1
c12.2	0.894147	0.302847	0.129	0.13	1
oys	0.89601	0.333417	0.145	0.152	1
Karybeta3	0.897751	0.35073	0.306	0.391	1
regucalcin	0.898092	0.85902	0.21	0.239	1
Tnpo	0.899216	0.269059	0.242	0.261	1
CG32809	0.901088	0.254277	0.097	0.109	1
Art1	0.901759	0.422824	0.242	0.304	1
schlank	0.902218	0.321213	0.403	0.5	1
Pp2B-14D	0.902489	0.263869	0.145	0.174	1
mRpL37	0.902489	0.256924	0.145	0.174	1
dpr7	0.902917	0.341719	0.258	0.304	1
unc-104	0.902973	0.341132	0.21	0.261	1
CG3625	0.904348	0.385474	0.323	0.391	1
CG11417	0.904762	0.287547	0.161	0.174	1
PIG-T	0.904853	0.323196	0.21	0.239	1
Usp10	0.905114	0.36043	0.194	0.217	1
CHES-1-like	0.905114	0.332501	0.194	0.217	1
Eps-15	0.905405	0.365213	0.129	0.152	1
CG2046	0.906838	0.338069	0.161	0.196	1
CG34288	0.908104	0.279292	0.113	0.13	1
VhaM9.7-b	0.909663	0.952312	0.597	0.826	1
Rae1	0.910255	0.298188	0.145	0.174	1
Ero1L	0.910466	0.260872	0.097	0.109	1
Nplp2	0.910811	0.599358	0.758	0.978	1
Ih	0.911542	0.442677	0.306	0.37	1
CG3226	0.912113	0.313502	0.194	0.217	1
wal	0.913986	0.369258	0.484	0.609	1
CG42724	0.914261	0.352152	0.161	0.196	1
REPTOR	0.91434	0.274196	0.387	0.457	1
mRpL20	0.916507	0.435905	0.242	0.283	1
SamDC	0.916822	0.350831	0.113	0.13	1
Alg-2	0.916956	0.250021	0.419	0.543	1
Phb2	0.917322	0.455622	0.419	0.565	1
CG2915	0.919653	0.387897	0.177	0.196	1
Nnp-1	0.919653	0.278481	0.177	0.196	1
CG14543	0.919944	0.343322	0.161	0.174	1
CG12974	0.921691	0.472128	0.161	0.196	1
bur	0.921798	0.403934	0.129	0.152	1
CG15347	0.921798	0.392619	0.129	0.152	1
osa	0.922909	0.391573	0.242	0.283	1
CG7781	0.924123	0.375909	0.468	0.609	1
ND-13B	0.925072	0.36947	0.484	0.674	1
Naa20A	0.926936	0.310784	0.177	0.196	1
Sep4	0.9279	0.277885	0.145	0.152	1
MYPT-75D	0.929128	0.330833	0.161	0.196	1
CG41378	0.929657	0.404527	0.21	0.261	1
flfl	0.930007	0.395375	0.129	0.152	1
CCT6	0.930873	0.446038	0.371	0.478	1
mRpL3	0.931414	0.370418	0.339	0.413	1
CG12279	0.931628	0.282496	0.226	0.283	1
CG43313	0.934225	0.265183	0.177	0.196	1
Eaat1	0.934289	0.375096	0.113	0.13	1
Pmp70	0.934289	0.348392	0.113	0.13	1
Syn	0.935155	0.267673	0.161	0.174	1
LpR2	0.935893	0.309235	0.145	0.152	1
CG6388	0.935893	0.308325	0.145	0.152	1
dpr14	0.938671	0.295477	0.097	0.109	1
CG5323	0.940172	0.350754	0.194	0.217	1
CG11885	0.941519	0.261926	0.177	0.196	1
Smyd5	0.943034	0.25506	0.113	0.13	1
CCT3	0.945582	0.334268	0.403	0.5	1
mago	0.946785	0.414156	0.339	0.478	1
viaf	0.947436	0.26225	0.371	0.478	1
CG1662	0.948092	0.276021	0.097	0.109	1
CG12531	0.948092	0.2745	0.097	0.109	1
larp	0.948146	0.346987	0.323	0.413	1
Vha100-2	0.94837	0.848877	0.274	0.348	1
CG9331	0.948561	0.354981	0.242	0.283	1
Prosalpha5	0.949045	0.258155	0.419	0.543	1
Sply	0.951897	0.254101	0.145	0.152	1
Hers	0.951897	0.253281	0.145	0.152	1
Sfxn1-3	0.952066	0.272244	0.355	0.435	1
CG6878	0.954245	0.268674	0.339	0.413	1
Rgk2	0.95752	0.288583	0.097	0.109	1
PCNA	0.960507	0.305572	0.274	0.348	1
AdSS	0.961775	0.288095	0.532	0.739	1
bi	0.962545	0.665079	0.21	0.239	1
AIMP1	0.963165	0.28994	0.274	0.326	1
Rdl	0.963681	0.383132	0.5	0.63	1
Galt	0.965643	0.259154	0.161	0.174	1
TM4SF	0.965675	0.32869	0.339	0.413	1
CG32373	0.966954	0.257136	0.097	0.109	1
Lfg	0.967921	0.29962	0.145	0.152	1
roq	0.968305	0.286339	0.194	0.217	1
Ars2	0.972756	0.291391	0.21	0.239	1
CG33169	0.972756	0.253633	0.21	0.239	1
CG9877	0.97386	-0.382926	0.177	0.174	1
slgA	0.975367	0.338945	0.403	0.478	1
CG6126	0.976392	0.408643	0.097	0.109	1
NetB	0.976392	0.349149	0.097	0.109	1
Hem	0.976392	0.297508	0.097	0.109	1
CG9065	0.977982	0.467551	0.371	0.5	1
GstZ2	0.979133	0.444116	0.29	0.37	1
CG13850	0.979565	0.317621	0.21	0.239	1
gce	0.984647	0.342993	0.274	0.326	1
mRpS25	0.985894	0.257891	0.355	0.435	1
ND-B14.5B	0.989824	0.253421	0.532	0.761	1
lid	0.990084	0.3503	0.226	0.261	1
CG17734	0.991284	0.592744	0.323	0.391	1
Act42A	0.991831	0.340796	0.387	0.522	1
CG9682	0.197986	2.74686	0.21	0.13	1
mRpS18C	0.993859	0.330329	0.274	0.326	1
CG9853	0.996477	0.425672	0.194	0.217	1
Ptp99A	0.997094	0.651217	0.323	0.391	1
CG31140	0.997159	0.331217	0.339	0.435	1
CanB	1	0.563356	0.242	0.304	1
ABCB7	1	0.422956	0.161	0.174	1
CG10340	1	0.385929	0.339	0.413	1
CG8036	1	0.348706	0.306	0.37	1
Men-b	1	0.331063	0.339	0.413	1
SPARC	1	0.316418	0.306	0.348	1

## Sheet: Neurons X
Columna1	p_val	avg_logFC	pct.1	pct.2	p_val_adj
CG12239	0.17842	-2.52061	0.503	0.383	1
CG42566	2.19013e-18	-0.602969	0.094	0.5	3.08021e-14
CG5059	9.98108e-17	-0.846938	0.201	0.65	1.40374e-12
RpL8	1.80624e-15	-0.648983	0.832	0.967	2.54029e-11
CG8157	2.29574e-15	-0.647439	0.166	0.583	3.22873e-11
Nplp2	4.68381e-15	-0.779142	0.277	0.733	6.58731e-11
ATPsynC	1.35747e-14	0.491411	0.984	0.983	1.90915e-10
RpL15	3.76465e-14	-0.548141	0.953	1	5.2946e-10
RpL41	1.26107e-13	-0.610585	0.977	1	1.77358e-09
RpS29	1.45879e-13	-0.548117	0.949	1	2.05164e-09
Cyp6a17	1.5336e-13	-0.325946	0.038	0.283	2.15686e-09
lncRNA:CR44832	0.120486	-2.41303	0.614	0.533	1
RpS6	5.60194e-13	-0.605167	0.756	0.967	7.87856e-09
RpS3	7.0948e-13	-0.655767	0.791	0.95	9.97812e-09
Non1	1.06345e-12	-0.716579	0.403	0.833	1.49564e-08
lncRNA:CR40469	1.20883e-35	-1.51263	0.021	0.417	1.7001e-31
CG14331	0.000111268	-1.39213	0.075	0.217	1
RpS23	2.34547e-12	-0.550425	0.869	0.983	3.29866e-08
Gapdh1	4.5351e-12	0.611734	0.977	0.933	6.37816e-08
Cyp28d1	5.8301e-12	-0.555881	0.042	0.267	8.19946e-08
RpS15Aa	7.83474e-12	-0.519223	0.839	0.983	1.10188e-07
Ldh	1.14863e-11	0.709276	0.928	0.883	1.61543e-07
Sirup	3.0893e-11	-0.699662	0.257	0.65	4.34479e-07
RpS14a	4.22761e-11	-0.545468	0.838	0.967	5.94572e-07
RpS16	4.98301e-11	-0.54274	0.867	0.95	7.00811e-07
Eno	5.25304e-11	0.504077	0.984	0.983	7.38787e-07
RpL35	7.79666e-11	-0.448869	0.86	1	1.09652e-06
RpS26	8.53652e-11	-0.506065	0.949	0.983	1.20058e-06
RpL32	8.64914e-11	-0.532598	0.941	0.967	1.21642e-06
RpL9	1.15102e-10	-0.606147	0.777	0.95	1.61879e-06
RpS18	1.98208e-10	-0.474402	0.876	0.983	2.78759e-06
RpL27	4.38745e-10	-0.457066	0.89	0.983	6.17051e-06
betaTub56D	6.90451e-10	0.513405	0.965	0.933	9.7105e-06
sty	6.93073e-10	-0.792665	0.175	0.517	9.74737e-06
Zip99C	7.94721e-10	-0.383766	0.079	0.333	1.1177e-05
RpS30	1.04688e-09	-0.47822	0.841	0.967	1.47233e-05
PyK	1.18727e-09	0.567416	0.916	0.917	1.66978e-05
RpS21	1.29179e-09	-0.471508	0.895	0.983	1.81677e-05
CG31357	1.30829e-09	-0.357876	0.117	0.417	1.83997e-05
Thor	1.44459e-09	-0.782458	0.253	0.617	2.03168e-05
pAbp	1.57728e-09	-0.500051	0.897	0.95	2.21828e-05
alphaTub84B	1.58277e-09	0.450466	0.976	0.967	2.22601e-05
Lip4	1.61365e-09	-0.609399	0.096	0.367	2.26944e-05
Hsc70-4	1.61374e-09	0.579132	0.871	0.817	2.26956e-05
RpL31	2.73728e-09	-0.412175	0.944	1	3.84972e-05
CG30053	2.79907e-09	-1.16733	0.021	0.167	3.93661e-05
l(1)G0193	3.16309e-09	-0.347093	0.054	0.267	4.44857e-05
RpL7A	3.51178e-09	-0.431132	0.916	0.983	4.93897e-05
Pdcd4	3.60346e-09	-0.610578	0.668	0.917	5.0679e-05
RpL21	3.64806e-09	-0.416638	0.951	0.983	5.13064e-05
AGO2	3.75173e-09	-0.31873	0.115	0.4	5.27643e-05
Vti1b	3.97253e-09	-0.502579	0.194	0.517	5.58696e-05
fabp	4.16149e-09	0.650147	0.832	0.65	5.85272e-05
Adgf-D	4.27822e-09	-0.251243	0.012	0.133	6.01689e-05
Fkbp12	4.87219e-09	0.451002	0.941	0.95	6.85225e-05
RpL30	4.90376e-09	-0.439792	0.85	0.933	6.89665e-05
IP3K2	5.49865e-09	-0.385953	0.009	0.117	7.7333e-05
tsr	7.74581e-09	0.527763	0.883	0.917	0.000108937
RpS11	8.4112e-09	-0.420779	0.946	0.983	0.000118295
RpS28b	9.58208e-09	-0.438623	0.923	1	0.000134762
LTV1	1.42107e-08	-0.574124	0.223	0.533	0.000199859
CG4364	1.61438e-08	-0.399156	0.199	0.533	0.000227047
RpL19	1.61875e-08	-0.410585	0.927	0.983	0.000227661
fok	1.9744e-08	-0.672372	0.389	0.733	0.000277679
RpL4	2.04544e-08	-0.469578	0.818	0.933	0.000287671
cer	2.1256e-08	-0.263823	0.073	0.3	0.000298944
CG15098	3.06852e-08	-0.456603	0.126	0.4	0.000431557
awd	3.4855e-08	0.531991	0.883	0.817	0.000490201
smt3	3.97625e-08	0.531253	0.85	0.783	0.00055922
RpL36	4.70831e-08	-0.443922	0.949	1	0.000662176
RpL11	5.53984e-08	-0.454905	0.871	0.933	0.000779124
RpL17	6.51867e-08	-0.373443	0.925	1	0.000916785
Capr	7.39103e-08	-0.304227	0.185	0.517	0.00103947
MtnA	7.39208e-08	-0.926382	0.346	0.683	0.00103962
RpS14b	1.00447e-07	-0.496795	0.749	0.917	0.00141268
RpL35A	1.01192e-07	-0.417316	0.883	0.967	0.00142316
CG17691	1.16071e-07	-0.3437	0.152	0.433	0.00163242
RpS17	1.1702e-07	-0.432988	0.918	1	0.00164576
Lk6	1.37061e-07	-0.501972	0.646	0.95	0.00192763
RpS9	1.43148e-07	-0.402135	0.925	0.983	0.00201324
unk	1.54667e-07	-0.600332	0.443	0.767	0.00217523
RpL3	1.61209e-07	-0.392557	0.906	1	0.00226725
REPTOR-BP	1.74405e-07	-0.563239	0.422	0.75	0.00245283
CrebA	1.75759e-07	-0.465893	0.075	0.283	0.00247187
lncRNA:CR42862	2.37625e-07	-0.512033	0.489	0.8	0.00334196
Ip259	2.40787e-07	-0.506866	0.436	0.75	0.00338643
stau	2.64277e-07	-0.325918	0.143	0.417	0.00371679
Lsd-2	2.82628e-07	-0.30373	0.028	0.167	0.00397488
GlyP	3.05562e-07	0.576979	0.806	0.733	0.00429742
RpS27	3.11398e-07	-0.357621	0.967	0.983	0.0043795
CG15891	3.36272e-07	-0.334474	0.182	0.467	0.00472933
CG42392	3.45524e-07	-0.4924	0.462	0.817	0.00485945
mt:ND3	4.182e-07	-0.580492	0.438	0.783	0.00588157
eIF3c	4.2183e-07	-0.378563	0.23	0.533	0.00593262
eIF3k	5.29246e-07	-0.46835	0.45	0.767	0.00744332
HLH3B	5.70256e-07	-0.505387	0.024	0.15	0.00802007
Hsp68	5.82594e-07	0.941256	0.311	0	0.00819361
futsch	1.15328e-06	0.548565	0.895	0.85	0.0162197
RpL29	1.21293e-06	-0.438375	0.899	0.967	0.0170587
RpS24	1.23826e-06	-0.366154	0.902	1	0.0174149
eIF3l	1.39871e-06	-0.435173	0.309	0.6	0.0196714
CG12868	1.4515e-06	-0.315424	0.026	0.15	0.0204139
CG4116	1.48728e-06	0.694205	0.293	0	0.0209171
CG34229	1.55077e-06	-0.287308	0.061	0.233	0.0218101
Hsp83	1.7302e-13	1.12142	0.801	0.567	2.43335e-09
RpS19a	1.56402e-06	-0.301899	0.895	0.967	0.0219963
RpL23	1.7997e-06	-0.369932	0.969	1	0.0253109
RpL38	1.80075e-06	-0.492248	0.951	0.933	0.0253257
hoip	1.9323e-06	0.819381	0.466	0.183	0.0271759
His3.3B	2.00035e-06	-0.599809	0.702	0.867	0.0281329
eEF5	2.16077e-06	-0.363461	0.838	0.967	0.0303891
ATPsynF	2.66481e-06	0.379546	0.883	0.95	0.037478
Tspo	2.67917e-06	-0.291406	0.176	0.45	0.0376799
eIF3b	2.79538e-06	-0.385311	0.332	0.633	0.0393143
FoxK	3.11328e-06	-0.255658	0.122	0.35	0.0437852
Uhg7	3.13067e-06	-0.577679	0.314	0.583	0.0440298
CG4025	3.27824e-06	-0.260434	0.054	0.217	0.0461052
RpL5	3.63848e-06	-0.374856	0.909	0.967	0.0511715
RpS13	3.70938e-06	-0.296813	0.974	0.983	0.0521688
RpL18A	3.80945e-06	-0.308447	0.963	1	0.0535762
CG3598	3.81736e-06	0.767537	0.312	0.033	0.0536873
bru3	4.04079e-06	0.460359	0.969	0.95	0.0568297
CG45050	4.06764e-06	-0.443117	0.735	0.95	0.0572073
Glut4EF	4.18708e-06	-0.437084	0.642	0.933	0.0588871
Mnn1	4.56814e-06	-0.373188	0.277	0.567	0.0642464
RpL10Ab	4.68107e-06	-0.290853	0.953	0.983	0.0658346
shep	4.78605e-06	0.439757	0.984	0.983	0.067311
Ilp5	5.18644e-06	1.12949	0.426	0.15	0.0729421
ogre	5.29462e-06	-0.432186	0.152	0.383	0.0744635
lncRNA:CR43283	5.43224e-06	-0.295469	0.154	0.4	0.0763991
Pgk	5.46588e-06	0.461328	0.864	0.883	0.0768721
RpS27A	6.75114e-06	-0.322123	0.956	0.983	0.094948
Dfd	6.78702e-06	-0.561633	0.03	0.15	0.0954527
Gat	6.82045e-06	-0.255656	0.831	0.567	0.0959228
RpL13	6.97426e-06	-0.295778	0.944	1	0.098086
Cyp1	7.4774e-06	0.360074	0.935	0.917	0.105162
Fer2LCH	8.41108e-06	-0.450841	0.754	0.917	0.118293
RpS5a	8.44757e-06	-0.311064	0.901	1	0.118807
Syx1A	9.11786e-06	0.366513	0.977	0.917	0.128234
Msr-110	9.5619e-06	-0.518916	0.079	0.25	0.134479
InR	9.5747e-06	-0.477246	0.51	0.817	0.134659
Ilp2	1.03759e-05	0.933839	0.623	0.467	0.145927
Hrb98DE	1.04809e-05	0.613932	0.719	0.65	0.147403
tna	1.08505e-05	-0.5165	0.738	0.983	0.152602
CG2082	1.11922e-05	-0.454079	0.213	0.467	0.157407
eIF3m	1.13716e-05	-0.40474	0.49	0.767	0.159931
RpS12	1.21335e-05	-0.303131	0.963	1	0.170646
CG7781	1.22891e-05	0.36951	0.935	0.917	0.172835
ewg	1.23666e-05	-0.296588	0.141	0.367	0.173924
RpL34b	1.25772e-05	-0.294889	0.894	0.95	0.176886
TfIIA-S	1.26571e-05	-0.375259	0.421	0.717	0.178009
Treh	1.29155e-05	-0.488681	0.161	0.383	0.181644
Tpi	1.3108e-05	0.362634	0.93	0.967	0.184351
CG32486	1.39271e-05	-0.413046	0.199	0.45	0.19587
Hsp23	1.40231e-05	0.499441	0.649	0.483	0.197221
RpL14	1.41362e-05	-0.322304	0.976	0.983	0.198812
l(3)L1231	1.44087e-05	-0.345698	0.291	0.583	0.202644
CG12262	1.46455e-05	-0.255826	0.061	0.217	0.205975
CG42258	1.65413e-05	-0.385206	0.332	0.617	0.232637
Gapdh2	1.82481e-05	0.312069	0.995	1	0.256641
bma	1.9276e-05	0.98967	0.422	0.15	0.271097
maf-S	2.04043e-05	-0.305897	0.414	0.733	0.286967
lncRNA:CR34335	2.14749e-05	-0.755876	0.942	0.95	0.302023
CG30419	2.19809e-05	-0.369332	0.204	0.45	0.309139
RpL28	2.34289e-05	-0.291962	0.958	0.983	0.329504
RpS8	2.77973e-05	-0.296927	0.962	1	0.390941
bic	2.94919e-05	-0.316222	0.721	0.9	0.414774
Ms	3.39754e-05	0.797816	0.618	0.467	0.47783
CG1545	3.58546e-05	-0.465751	0.202	0.433	0.504259
RpL24-like	3.6518e-05	-0.379466	0.558	0.817	0.51359
CG7888	4.02814e-05	-0.898654	0.187	0.383	0.566518
mnd	4.25275e-05	-0.56634	0.183	0.383	0.598107
CG1572	4.4767e-05	-0.305067	0.152	0.367	0.629604
CG17075	5.53709e-05	-0.272654	0.051	0.183	0.778737
Hsp67Bc	5.94958e-05	0.630513	0.7	0.6	0.836749
RpL37A	6.79668e-05	-0.308912	0.944	0.95	0.955885
rudhira	7.25406e-05	-0.33036	0.445	0.7	1
lncRNA:CR42651	7.63121e-05	-0.322308	0.023	0.117	1
CG31706	7.98078e-05	-0.406229	0.223	0.45	1
RNASEK	8.04144e-05	0.3627	0.867	0.933	1
Herc4	8.60637e-05	-0.266725	0.098	0.267	1
COX7A	9.24961e-05	0.37116	0.817	0.933	1
lncRNA:CR42491	9.80163e-05	0.62852	0.291	0.067	1
CanB	0.000105926	0.519419	0.745	0.75	1
Rack1	0.000110295	-0.344875	0.836	0.95	1
AstA	0.224008	1.14763	0.15	0.1	1
RpL12	0.000111819	-0.255784	0.942	1	1
CG6330	0.000112918	-0.350181	0.393	0.667	1
tsh	0.000115635	-0.340872	0.038	0.15	1
Sidpn	0.000117806	-0.462273	0.209	0.417	1
Pgi	0.000118949	0.424605	0.799	0.817	1
CG31030	0.000119567	0.495701	0.74	0.75	1
sno	0.000121116	-0.349779	0.267	0.517	1
tun	0.000123707	-0.264401	0.178	0.383	1
CG9328	0.000124625	-0.298197	0.216	0.45	1
eEF2	0.000125441	-0.308964	0.716	0.9	1
CG44838	0.000127017	-0.341907	0.452	0.75	1
CG7646	0.000128402	0.392103	0.843	0.833	1
Tpc1	0.000129552	-0.251368	0.073	0.217	1
RpL26	0.000130565	-0.263277	0.96	0.983	1
eEF1gamma	0.000139192	-0.317489	0.661	0.883	1
dally	0.000139636	-0.612579	0.417	0.683	1
CG9691	0.00014067	-0.550509	0.267	0.5	1
COX5A	0.000150136	0.355404	0.836	0.9	1
wech	0.000158025	-0.279003	0.335	0.633	1
CG46301	0.000181582	-0.507595	0.447	0.767	1
CG33129	0.000183458	0.659165	0.606	0.5	1
Vha14-1	0.000183578	0.424121	0.743	0.783	1
Pglym78	0.000186728	0.281583	0.962	1	1
Nlp	0.000195494	0.530439	0.71	0.7	1
MFS3	0.000205827	0.622316	0.64	0.533	1
natalisin	0.105448	1.16438	0.173	0.1	1
CG13920	0.000237147	0.574084	0.674	0.633	1
HDAC1	0.000241575	0.573432	0.335	0.117	1
Calr	0.000250375	0.394941	0.805	0.85	1
CG42795	0.000258606	-0.332793	0.119	0.283	1
tipE	0.000259345	-0.260653	0.253	0.483	1
mt:Cyt-b	0.00026472	0.257856	0.991	1	1
kra	0.000277808	0.352463	0.789	0.833	1
sbb	0.000284761	0.346298	0.935	0.933	1
Paip2	0.000290645	-0.322627	0.237	0.467	1
RpL39	0.000299121	-0.251586	0.984	0.95	1
Hug	0.000300486	-0.27123	0.284	0.533	1
RpL23A	0.000324401	-0.330744	0.916	0.983	1
Dpy-30L1	0.000330612	-0.329481	0.173	0.367	1
Hs3st-A	0.000332414	-0.26831	0.244	0.483	1
VGlut	0.000343337	0.738592	0.607	0.417	1
ana	0.000401507	-0.251839	0.044	0.15	1
alrm	0.000440875	-0.359381	0.759	0.533	1
lncRNA:roX2	0.000491122	-0.348832	0.541	0.767	1
ATPsynE	0.000492517	0.435767	0.752	0.783	1
lncRNA:CR42549	0.00051288	-0.283766	0.07	0.2	1
CG12163	0.000535208	-0.259538	0.288	0.517	1
RpL34a	0.000552652	-0.310487	0.585	0.85	1
CG13868	0.000555492	-0.293151	0.386	0.633	1
TyrR	0.000562381	-0.327676	0.112	0.267	1
Hsp27	0.000565594	0.72647	0.41	0.217	1
CG16791	0.00058293	-0.295108	0.428	0.683	1
Nph	0.000658004	0.676052	0.489	0.35	1
nAChRalpha6	0.000692431	0.42588	0.948	0.967	1
blw	0.000702558	0.271648	0.859	0.9	1
AstCC	0.0434955	1.18235	0.115	0.033	1
CG9336	0.00074527	-0.32928	0.147	0.317	1
prt	0.000756556	-0.624242	0.098	0.233	1
Jafrac1	0.000774823	0.51362	0.658	0.6	1
Dop2R	0.000781856	-0.404273	0.333	0.533	1
eIF1A	0.000813437	-0.267093	0.585	0.817	1
mt:srRNA	0.00082108	-0.317547	0.113	0.267	1
bi	0.00311903	1.18853	0.316	0.15	1
alc	0.000888142	-0.262744	0.326	0.55	1
Sod1	0.000888925	0.402751	0.716	0.767	1
CG43222	0.000903691	0.490903	0.668	0.617	1
CG14423	1.3396e-12	1.21112	0.557	0.067	1.88402e-08
Sh	0.00091407	0.354292	0.951	0.967	1
Ho	0.000939102	-0.251289	0.086	0.217	1
nAChRbeta1	0.000978493	0.414276	0.749	0.65	1
CG13551	0.00100587	-0.267137	0.499	0.783	1
Met	0.0010139	-0.346912	0.234	0.433	1
dpr19	0.00105526	0.572074	0.576	0.467	1
CG11267	0.0010876	0.446629	0.693	0.667	1
Nop56	0.00109041	0.570076	0.387	0.2	1
CG1910	0.00112727	-0.306372	0.227	0.417	1
Mpcp2	0.00113336	-0.349414	0.647	0.8	1
Hel25E	0.00115652	0.660623	0.475	0.367	1
CG6770	0.00119746	-0.338189	0.756	0.867	1
Xrp1	0.00135335	-0.779681	0.394	0.617	1
mfas	0.00138055	-0.324154	0.101	0.233	1
CG34383	0.00152766	-0.287404	0.283	0.483	1
nmo	0.00156674	0.279273	0.901	0.9	1
Rdl	0.00167613	0.264617	0.972	0.983	1
uex	0.00171214	0.457591	0.67	0.617	1
Cyp9f2	0.00175117	-0.327142	0.089	0.217	1
CG11247	0.00184031	-0.336434	0.126	0.267	1
SIFa	0.00185537	0.602867	0.461	0.3	1
CG44325	0.00191	-0.295763	0.297	0.517	1
alphaTub84D	0.00195857	0.567099	0.51	0.417	1
Hsp70Bc	0.00206301	0.567234	0.164	0.017	1
Cngl	0.00229741	0.516072	0.902	0.883	1
Rbp1-like	0.00235085	0.4085	0.752	0.783	1
Eip78C	0.00238496	-0.382496	0.188	0.35	1
GluRIA	0.00240018	-0.25846	0.3	0.5	1
rad	0.00253207	0.592816	0.681	0.55	1
lncRNA:CR43334	0.00261704	-0.30811	0.293	0.517	1
Wbp2	0.00264269	-0.2516	0.145	0.3	1
CG30172	0.00265885	0.273357	0.902	0.883	1
Cip4	0.0027332	0.725788	0.436	0.3	1
Fkbp39	0.00277008	0.607229	0.436	0.283	1
Uhg4	0.0029439	0.543891	0.475	0.333	1
ATPsynD	0.00294637	0.267499	0.798	0.817	1
CG13784	0.00298951	-0.338861	0.236	0.417	1
eff	0.00305024	0.268764	0.834	0.883	1
CG1552	0.00307559	-0.671683	0.321	0.5	1
Argk	0.00308619	0.272845	0.869	0.867	1
Dh31	0.000229674	1.22492	0.473	0.267	1
beat-Ic	0.00313195	-0.587427	0.356	0.567	1
mt:ND2	0.00321162	-0.301944	0.428	0.667	1
Tom7	0.00333931	0.389871	0.728	0.8	1
Ten-a	0.00356289	0.432703	0.937	0.95	1
slo	0.00361839	0.383009	0.855	0.9	1
Trx-2	0.00364061	0.328471	0.742	0.783	1
CG11000	0.00380232	0.431999	0.764	0.767	1
NHP2	0.00407577	0.539723	0.354	0.2	1
Rap1	0.00407633	0.365654	0.743	0.767	1
eEF1alpha1	0.00408032	-0.26455	0.967	0.983	1
sdt	0.0043042	0.455079	0.822	0.8	1
l(3)72Ab	0.00432539	0.358157	0.176	0.033	1
shi	0.0044392	0.304489	0.792	0.867	1
dpr10	0.00464603	0.530478	0.38	0.233	1
CG43693	0.00472354	-0.348737	0.283	0.45	1
dysc	0.00479955	0.284863	0.913	0.883	1
Cyp4g15	0.00486742	-0.359307	0.283	0.45	1
Bsg	0.00502455	0.278044	0.902	0.95	1
Vha26	0.00507221	0.284619	0.778	0.767	1
Syt7	0.0051164	-0.250675	0.471	0.717	1
CG10395	0.00531486	-0.274855	0.148	0.283	1
CG5065	0.00537164	0.451081	0.66	0.617	1
CG42817	0.00546577	-0.519001	0.25	0.417	1
CG17193	0.00554439	-0.256402	0.239	0.417	1
Act42A	0.00565111	0.336119	0.716	0.75	1
Vha100-1	0.00568683	0.482021	0.565	0.483	1
mlt	0.0057431	-0.275283	0.11	0.233	1
Pur-alpha	0.00596695	0.581819	0.593	0.533	1
CG7637	0.00607861	0.589965	0.459	0.35	1
GstZ2	0.00610837	0.502727	0.613	0.633	1
CG43778	0.00625529	-0.334142	0.222	0.383	1
prtp	0.00626417	0.497797	0.419	0.267	1
ATPsyndelta	0.00635547	0.32634	0.728	0.767	1
Pkc53E	0.00635915	0.38554	0.74	0.683	1
cpx	0.00647011	-0.253112	0.908	0.933	1
jdp	0.00686725	0.380163	0.75	0.667	1
eEF1delta	0.00687104	0.572245	0.422	0.3	1
CG1307	0.00688701	0.365036	0.237	0.083	1
UQCR-Q	0.00747797	0.293043	0.791	0.917	1
Nlg3	0.00751804	0.252362	0.716	0.617	1
UQCR-11	0.00776479	0.280585	0.806	0.817	1
CG42668	0.00858578	0.552872	0.452	0.317	1
lncRNA:Hsromega	0.00873032	0.315982	0.92	0.933	1
CG32683	0.00944562	0.732561	0.421	0.3	1
REPTOR	0.00945662	-0.253945	0.396	0.617	1
Spred	0.00971982	-0.276202	0.564	0.767	1
flw	0.00972403	0.434547	0.665	0.667	1
CG5955	0.00973943	0.384959	0.204	0.067	1
CD98hc	0.0103591	0.262476	0.745	0.733	1
VhaM9.7-b	0.0104402	-0.302639	0.373	0.55	1
Hsp67Ba	0.010475	0.318431	0.131	0.017	1
scaf6	0.0104786	0.593845	0.323	0.2	1
ATPsynO	0.0110221	0.367002	0.705	0.783	1
Toll-6	0.0112203	0.376284	0.627	0.483	1
CG7191	0.0116977	0.791482	0.171	0.05	1
glo	0.0117726	0.477127	0.438	0.317	1
MED26	0.0125558	0.510603	0.565	0.517	1
P32	0.0131565	0.525404	0.426	0.333	1
SkpA	0.0132276	0.3676	0.665	0.717	1
Dak1	0.013299	0.305587	0.716	0.783	1
CG11563	0.0133943	0.333629	0.148	0.033	1
B52	0.0134888	0.380811	0.64	0.633	1
sqd	0.013618	0.316424	0.764	0.85	1
Rm62	0.0138133	0.303913	0.702	0.717	1
CG9394	0.0138412	-0.315991	0.098	0.2	1
ATP6AP2	0.0139666	0.351859	0.675	0.7	1
Crk	0.0140688	0.385165	0.592	0.517	1
nrm	0.0141133	0.675107	0.522	0.433	1
CCT3	0.0142739	0.563186	0.346	0.25	1
SK	0.0144855	0.284562	0.731	0.7	1
sima	0.0145027	-0.390386	0.344	0.517	1
sif	0.0145982	-0.331272	0.597	0.85	1
CG31229	0.0149625	0.410302	0.232	0.1	1
CG14418	0.0153762	0.305981	0.117	0.017	1
Pgm	0.0158497	0.428663	0.604	0.583	1
SerRS	0.0161436	0.389111	0.281	0.15	1
Act57B	0.0164149	0.527431	0.237	0.117	1
egh	0.017081	0.463703	0.607	0.567	1
CG14855	0.0179589	0.284862	0.115	0.017	1
MYPT-75D	0.01833	-0.440318	0.229	0.367	1
Mp	0.0188392	0.546792	0.492	0.383	1
CG43085	0.0190387	-0.683313	0.34	0.483	1
CG14591	0.0191402	0.500532	0.426	0.333	1
slgA	0.0192916	0.30895	0.696	0.683	1
CG31221	0.0196206	0.313661	0.832	0.75	1
sNPF	0.019761	0.896273	0.295	0.167	1
Ntf-2	0.0205082	0.425925	0.517	0.45	1
Pfdn6	0.0220028	0.416956	0.489	0.417	1
CG13739	0.0220818	0.605997	0.332	0.2	1
CG12065	0.0221953	-0.283302	0.092	0.183	1
CG42340	0.022224	0.625881	0.37	0.267	1
dpr7	0.0225436	0.271716	0.761	0.833	1
beat-IIIb	0.0226101	0.485356	0.487	0.367	1
Art1	0.022683	0.295263	0.265	0.133	1
mmd	0.022902	0.385909	0.806	0.867	1
Sem1	0.0235467	0.458054	0.48	0.417	1
Ran	0.0252821	0.453894	0.527	0.517	1
Eaat1	0.0263803	-0.754464	0.274	0.383	1
Trim9	0.0283349	-0.290041	0.185	0.3	1
Hr4	0.0288449	0.284954	0.558	0.45	1
Dhx15	0.0288464	0.336292	0.126	0.033	1
Rab27	0.0293173	0.48375	0.504	0.433	1
mtSSB	0.0300588	0.285733	0.215	0.1	1
scro	0.0309381	0.333079	0.105	0.017	1
CG33170	0.031454	0.37461	0.597	0.6	1
grn	0.0314878	-0.398049	0.096	0.183	1
CG32700	0.031552	0.423759	0.599	0.5	1
CG17734	0.031612	0.476025	0.515	0.483	1
Sec61beta	0.0316568	0.469041	0.55	0.583	1
DnaJ-1	0.0334694	0.361944	0.321	0.2	1
gish	0.0335139	0.390695	0.693	0.75	1
ADPS	0.0336587	0.370577	0.244	0.133	1
VhaPPA1-1	0.0343231	0.371955	0.63	0.683	1
CG12355	0.0347441	-0.277778	0.208	0.317	1
CG13928	0.034758	0.268458	0.736	0.767	1
CG6937	0.0352038	0.268277	0.143	0.05	1
CG4729	0.0361787	0.402802	0.389	0.283	1
FoxP	0.0366975	0.43864	0.356	0.25	1
mub	0.0369216	0.451044	0.515	0.433	1
SC35	0.0389392	0.454524	0.459	0.4	1
Hs3st-B	0.0396828	0.298323	0.208	0.1	1
CG45263	0.0402034	0.561633	0.553	0.5	1
CG2918	0.0406948	0.437129	0.23	0.133	1
eIF4B	0.0407149	0.454843	0.387	0.3	1
heph	0.0407374	0.582688	0.639	0.583	1
Pomp	0.0407744	0.456343	0.447	0.417	1
Unc-115a	0.0408063	0.265018	0.14	0.05	1
Tsp66E	0.0420067	0.25476	0.838	0.867	1
UBL3	0.0425869	0.378845	0.504	0.45	1
Dh31-R	0.0426403	0.361741	0.162	0.067	1
CNBP	0.0428356	0.281661	0.709	0.767	1
CG10321	0.0429714	0.280845	0.14	0.05	1
Hsp26	1.57522e-12	1.2847	0.684	0.283	2.21539e-08
vig2	0.0440569	0.37156	0.557	0.533	1
kcc	0.0442514	0.343401	0.681	0.7	1
CG4612	0.0452168	0.354106	0.618	0.633	1
ND-AGGG	0.0453256	0.309272	0.599	0.583	1
CG40045	0.0472458	0.260683	0.705	0.75	1
CG14767	0.0473334	0.34571	0.548	0.517	1
CG13248	0.0473736	0.40999	0.251	0.15	1
Dsk	0.0475039	0.935946	0.227	0.117	1
p23	0.048254	0.334339	0.637	0.717	1
PNUTS	0.0487355	0.446758	0.408	0.333	1
ImpL2	0.0491181	0.924303	0.269	0.167	1
emc	0.0496977	0.347819	0.625	0.567	1
Eb1	0.049765	0.342359	0.606	0.6	1
CG42674	0.0500729	-0.318619	0.307	0.45	1
Mad	0.0508879	0.459892	0.311	0.217	1
shakB	0.0511346	0.75498	0.569	0.533	1
HmgZ	0.0514427	-0.283831	0.803	0.95	1
Gs2	0.0517485	-0.546252	0.785	0.667	1
CG5721	0.0522019	0.258626	0.134	0.05	1
Jwa	0.0535669	0.408014	0.37	0.283	1
Non2	0.0537514	0.406029	0.501	0.5	1
Cbp53E	0.0547979	0.423495	0.791	0.767	1
dod	0.0554694	0.397065	0.379	0.3	1
CG3420	0.0556535	0.313414	0.232	0.133	1
CG10470	0.0562204	0.456331	0.36	0.283	1
Octbeta1R	0.0568899	0.474118	0.396	0.3	1
grp	0.0569748	0.449898	0.435	0.4	1
Maf1	0.0569938	0.347401	0.476	0.417	1
ab	0.0571204	-0.263312	0.363	0.517	1
spen	0.0572826	-0.266176	0.838	0.917	1
CG7519	0.0575179	0.35345	0.169	0.083	1
CG4887	0.0577289	0.389432	0.188	0.1	1
Eh	0.0577711	0.429887	0.269	0.183	1
lncRNA:CR44978	0.0578967	0.284614	0.134	0.05	1
alpha-Man-Ib	0.0584456	0.396824	0.223	0.133	1
Picot	0.0592075	-0.350184	0.173	0.267	1
spab	0.0599472	0.502586	0.351	0.25	1
mod	0.0609038	0.451761	0.391	0.333	1
ERp60	0.0620798	0.490856	0.442	0.417	1
dlg1	0.062718	0.250961	0.791	0.8	1
Obp44a	0.0634524	-0.406653	0.937	0.867	1
Sf3b6	0.0645586	0.373287	0.386	0.3	1
Tm1	0.0660978	0.255751	0.792	0.917	1
jef	0.0664662	0.434346	0.531	0.5	1
CG8635	0.0676724	0.362075	0.241	0.15	1
La	0.0684438	0.344947	0.29	0.2	1
CG31126	0.0692729	0.356568	0.253	0.167	1
CG43737	0.070641	0.461709	0.62	0.583	1
hig	0.0717165	-0.384614	0.302	0.4	1
Octbeta3R	0.0721174	0.499899	0.506	0.467	1
CG30197	0.0740457	-0.515447	0.18	0.283	1
CG12107	0.0743603	0.382868	0.258	0.167	1
SerT	0.0747103	-0.273308	0.07	0.133	1
EloC	0.0748829	0.389347	0.558	0.567	1
CG12567	0.0754014	0.326108	0.255	0.167	1
mam	0.0766497	-0.29339	0.452	0.6	1
RhoGAP71E	0.0770675	0.380444	0.576	0.567	1
Dop1R1	0.0785893	0.380457	0.187	0.1	1
Frl	0.0786166	0.255454	0.457	0.383	1
Cyt-c1	0.0790132	0.304362	0.546	0.533	1
Hrb87F	0.0807077	0.338574	0.461	0.4	1
GCS2alpha	0.0814061	0.443963	0.45	0.4	1
Sik3	0.0822454	0.408344	0.305	0.217	1
CG3939	0.0824203	0.310112	0.162	0.083	1
CG13921	0.0834851	0.344629	0.195	0.117	1
CCT5	0.0848906	0.449627	0.319	0.25	1
Fum1	0.0883317	0.302773	0.461	0.383	1
Ca-alpha1T	0.0888076	0.490328	0.45	0.383	1
CG33116	0.0905417	0.344969	0.175	0.1	1
CG14321	0.0914214	0.361633	0.386	0.333	1
Trxr-1	0.0919113	0.41181	0.332	0.267	1
SiaT	0.0931411	0.310438	0.162	0.083	1
CCT8	0.093239	0.380266	0.26	0.183	1
SmF	0.0943425	0.295505	0.332	0.267	1
Pde9	0.0952341	0.267512	0.67	0.717	1
CG9705	0.0957214	0.322549	0.37	0.283	1
JIL-1	0.0969942	0.417985	0.48	0.417	1
Hrs	0.0990047	0.278913	0.117	0.05	1
CG15449	0.102021	0.406496	0.154	0.083	1
CG6610	0.102791	0.257811	0.176	0.1	1
Uhg5	0.103146	0.355179	0.298	0.217	1
Socs36E	0.103704	0.341131	0.377	0.317	1
rump	0.104266	0.373052	0.361	0.3	1
CG5056	0.104532	0.316191	0.152	0.083	1
Tk	0.000719408	1.47083	0.164	0	1
Rop	0.106073	0.261045	0.611	0.633	1
CG8498	0.10671	0.339348	0.534	0.567	1
RSG7	0.107355	0.355469	0.581	0.583	1
Rbp1	0.107533	0.349087	0.485	0.45	1
vvl	0.108279	0.285878	0.462	0.383	1
CG8079	0.108397	0.319182	0.136	0.067	1
CG1607	0.108752	0.349623	0.543	0.533	1
Phf5a	0.109623	0.426648	0.353	0.3	1
CG9922	0.109672	0.374643	0.325	0.267	1
vir-1	0.109704	-0.281349	0.159	0.233	1
spas	0.111755	0.323414	0.169	0.1	1
CG32225	0.113527	0.278239	0.34	0.25	1
Pfdn1	0.113658	0.280461	0.372	0.283	1
Eaat2	0.114428	0.35765	0.297	0.217	1
CG33090	0.11541	0.322255	0.19	0.117	1
Psn	0.115833	0.25511	0.171	0.1	1
CG17816	0.116134	0.262487	0.593	0.6	1
SmD2	0.118188	0.330875	0.429	0.383	1
CG15168	0.119653	0.271536	0.267	0.183	1
UQCR-C2	0.119735	0.331821	0.607	0.683	1
Mip	0.000886972	1.564	0.253	0.067	1
SmE	0.121456	0.415506	0.447	0.433	1
beat-IIIc	0.121703	0.287219	0.37	0.267	1
Task6	0.122242	0.441019	0.415	0.383	1
Pvf3	0.123096	0.437272	0.442	0.383	1
CG1677	0.124565	0.436055	0.602	0.65	1
Ptp99A	0.125038	0.50631	0.812	0.917	1
Pfdn2	0.126131	0.417194	0.424	0.4	1
CG4409	0.12628	-0.2894	0.346	0.417	1
His2Av	0.126623	0.340168	0.536	0.55	1
CG11858	0.127552	0.317522	0.204	0.133	1
CG15765	0.128515	0.495812	0.487	0.467	1
CSN5	0.129211	0.315586	0.166	0.1	1
VhaAC39-1	0.130088	0.326088	0.574	0.633	1
CG17684	0.130198	0.302899	0.129	0.067	1
SpdS	0.130961	0.257924	0.232	0.15	1
CG32204	0.131037	0.395329	0.223	0.15	1
rin	0.131723	0.285505	0.644	0.75	1
CG10576	0.13178	0.280194	0.346	0.267	1
CG31323	0.133277	0.314366	0.215	0.133	1
CG5934	0.13361	0.372602	0.33	0.283	1
beat-Va	0.135899	0.305683	0.279	0.2	1
Gp93	0.136563	0.341733	0.368	0.3	1
Vmat	0.138272	-0.44097	0.431	0.383	1
CG3902	0.139738	0.279984	0.164	0.1	1
mRpL35	0.13997	0.308943	0.26	0.183	1
Tim17b	0.140313	0.254821	0.616	0.667	1
CG4972	0.143206	0.274153	0.211	0.133	1
Nup358	0.14335	0.251933	0.108	0.05	1
DAT	0.145141	0.356704	0.105	0.05	1
CG6084	0.146138	0.323187	0.251	0.183	1
Actbeta	0.146147	0.438284	0.339	0.3	1
Ubr3	0.146697	0.39908	0.464	0.467	1
ND-15	0.14758	0.343288	0.525	0.55	1
SmB	0.149496	0.365614	0.48	0.483	1
CG15916	0.151358	0.283115	0.201	0.133	1
Hacd1	0.155281	0.357074	0.264	0.2	1
AstA-R1	0.157201	0.46404	0.229	0.167	1
CG14762	0.158115	0.418286	0.499	0.517	1
unc-13-4A	0.15885	0.498677	0.489	0.483	1
cdi	0.16227	0.275196	0.642	0.633	1
Sfxn1-3	0.162419	0.321112	0.578	0.65	1
RpII18	0.165482	0.268473	0.435	0.4	1
nrv2	0.166088	-0.289445	0.635	0.717	1
CG6878	0.166487	0.340044	0.344	0.3	1
dpr20	0.16719	0.265651	0.23	0.167	1
CG2993	0.167516	0.35082	0.373	0.333	1
CG44098	0.170077	0.393396	0.241	0.183	1
CG32017	0.173357	0.291317	0.632	0.617	1
EndoB	0.1751	0.284115	0.318	0.25	1
CG8300	0.175495	0.278637	0.14	0.083	1
LSm3	0.17586	0.377195	0.206	0.15	1
Mdh2	0.17702	0.289764	0.586	0.667	1
CG34132	0.177311	0.292969	0.483	0.467	1
NPF	1.56122e-06	1.67958	0.332	0.033	0.021957
Droj2	0.179818	0.369679	0.431	0.417	1
pont	0.180427	0.251191	0.159	0.1	1
CG3618	0.180937	0.360357	0.283	0.233	1
fkh	0.181021	0.354603	0.101	0.05	1
CG15537	0.181558	0.648631	0.218	0.15	1
EndoA	0.182331	0.339134	0.531	0.55	1
lark	0.184273	0.305632	0.485	0.467	1
Stt3B	0.184653	0.273628	0.206	0.15	1
Uck	0.188921	0.251366	0.232	0.167	1
Atox1	0.188951	0.324975	0.333	0.283	1
fwe	0.189905	0.261473	0.625	0.683	1
Uhg1	0.192887	0.381504	0.298	0.25	1
Rbp	0.193899	0.356354	0.569	0.583	1
CSN6	0.194133	0.289675	0.206	0.15	1
Vha44	0.204038	0.324526	0.564	0.633	1
PMP34	0.205278	0.303758	0.23	0.183	1
Xe7	0.205534	0.382228	0.358	0.317	1
CG9813	0.205881	0.30992	0.316	0.25	1
SmD1	0.209118	0.350567	0.298	0.25	1
Pp4-19C	0.210267	0.250736	0.169	0.117	1
CG5174	0.211611	0.295548	0.429	0.4	1
dpr14	0.212648	0.347478	0.557	0.6	1
Akap200	0.217417	0.296543	0.546	0.6	1
cg	0.218915	0.3208	0.588	0.6	1
Galphas	0.219017	0.264471	0.553	0.533	1
eRF1	0.21947	0.367995	0.415	0.417	1
GlcAT-S	0.219682	0.25841	0.206	0.15	1
CG13404	0.22016	0.257289	0.168	0.117	1
mago	0.222316	0.307488	0.332	0.3	1
AstC	0.000913113	1.891	0.339	0.15	1
Bap55	0.2257	0.25156	0.283	0.233	1
l(2)41Ab	0.229591	0.272356	0.15	0.1	1
RhoBTB	0.23038	0.313736	0.279	0.233	1
DIP-zeta	0.231958	0.361443	0.154	0.1	1
CG11444	0.23623	0.313175	0.356	0.35	1
Sep2	0.237008	0.343543	0.445	0.45	1
Naa30A	0.237594	0.335066	0.145	0.1	1
CG3655	0.239418	0.262937	0.136	0.083	1
prim	0.239738	0.306271	0.297	0.25	1
CG9413	0.239756	0.373506	0.37	0.35	1
mRpL27	0.241424	0.317963	0.248	0.2	1
elB	0.245695	0.374138	0.354	0.3	1
CG3625	0.246265	0.28047	0.56	0.6	1
Su(var)205	0.246474	0.287419	0.534	0.567	1
Pdxk	0.246499	0.2516	0.112	0.067	1
CG14806	0.24767	0.40957	0.279	0.25	1
Hsc70-3	0.247851	0.273478	0.6	0.617	1
Hsc70Cb	0.248827	0.33526	0.342	0.317	1
Arpc5	0.256369	0.331715	0.298	0.267	1
CG5021	0.260751	0.271129	0.265	0.217	1
CG14502	0.262023	0.277027	0.112	0.067	1
mRpS26	0.263212	0.265948	0.271	0.217	1
CG3226	0.264616	0.277789	0.25	0.2	1
Pli	0.26543	0.420112	0.428	0.417	1
Atg1	0.265824	0.342608	0.244	0.2	1
Den1	0.265881	0.318831	0.279	0.233	1
CG14210	0.267623	0.256125	0.178	0.133	1
CG3760	0.267828	0.294258	0.34	0.3	1
CG6123	0.268043	0.378817	0.298	0.25	1
Sxl	0.268913	0.255807	0.728	0.733	1
CG9384	0.269621	0.327779	0.147	0.1	1
tsu	0.270355	0.303958	0.401	0.4	1
CG43689	0.270963	0.505637	0.244	0.2	1
Ykt6	0.272983	0.285151	0.297	0.25	1
eIF2beta	0.273319	0.273418	0.45	0.433	1
CG17493	0.274065	0.279605	0.455	0.45	1
mEFTu1	0.27673	0.290933	0.342	0.317	1
Sytbeta	0.27939	0.263136	0.531	0.533	1
Scamp	0.280433	0.392527	0.394	0.4	1
me31B	0.282238	0.360174	0.41	0.417	1
SmD3	0.283282	0.276541	0.365	0.333	1
Ipp	0.2846	0.337052	0.412	0.417	1
Lrp4	0.291073	0.309741	0.506	0.517	1
PDCD-5	0.293257	0.351445	0.344	0.317	1
GABA-B-R2	0.296394	0.284644	0.276	0.233	1
CkIIalpha	0.299112	0.268474	0.558	0.6	1
Rpn1	0.301349	0.298423	0.223	0.183	1
Bka	0.302648	0.25891	0.141	0.1	1
CanB2	0.305632	0.257606	0.492	0.5	1
CG8726	0.307587	0.287182	0.449	0.433	1
CG3253	0.307949	0.25932	0.175	0.133	1
CG1402	0.308849	0.363457	0.106	0.067	1
sina	0.30983	0.317906	0.52	0.533	1
NC2alpha	0.311432	0.2691	0.14	0.1	1
Cka	0.312585	0.322179	0.501	0.5	1
Fim	0.313607	0.337708	0.447	0.45	1
OstDelta	0.31381	0.262181	0.276	0.233	1
Tomosyn	0.314334	0.388793	0.469	0.5	1
hdc	0.318354	-0.380848	0.422	0.383	1
Sytalpha	0.323721	0.360013	0.241	0.2	1
CG8929	0.324415	0.286467	0.41	0.383	1
Hk	0.324692	0.283471	0.64	0.717	1
kud	0.324929	0.32031	0.349	0.333	1
lncRNA:CR46006	0.327372	0.315235	0.12	0.083	1
Ostgamma	0.33099	0.301618	0.314	0.283	1
Gad1	0.331368	0.447779	0.394	0.367	1
CG31191	0.331714	0.302371	0.222	0.183	1
Gycbeta100B	0.336955	0.32091	0.201	0.167	1
Pen	0.338797	0.311818	0.154	0.117	1
CG2046	0.340322	0.261125	0.169	0.133	1
robo2	0.340821	-0.581159	0.192	0.233	1
gol	0.340842	0.25575	0.241	0.2	1
CG8369	0.346377	-0.428899	0.539	0.617	1
Dh44	0.348817	0.300825	0.175	0.133	1
Fib	0.352239	0.25607	0.309	0.283	1
esn	0.35382	0.284709	0.188	0.15	1
CkIIbeta	0.355752	0.258042	0.49	0.483	1
DIP-gamma	0.356583	0.294505	0.218	0.183	1
CG9917	0.357122	0.268408	0.218	0.183	1
CG5446	0.359824	0.323915	0.473	0.517	1
Men-b	0.359929	0.3895	0.386	0.4	1
Tudor-SN	0.360228	0.334164	0.267	0.25	1
beat-IIb	0.363241	0.442467	0.295	0.267	1
dock	0.365095	0.27006	0.297	0.267	1
CG10418	0.369695	0.27889	0.236	0.2	1
CG11388	0.371589	0.378791	0.271	0.25	1
beat-Ia	0.372018	0.354565	0.223	0.183	1
Syx7	0.373981	0.283406	0.277	0.25	1
Nos	0.376873	0.339537	0.12	0.083	1
CG6006	0.379358	0.564753	0.169	0.133	1
Optix	0.379984	0.326115	0.192	0.15	1
Lcch3	0.381892	0.303954	0.496	0.533	1
CG4133	0.382309	0.275659	0.295	0.267	1
Eps-15	0.383044	0.299463	0.312	0.283	1
nkd	0.383131	0.289141	0.546	0.583	1
Stt3A	0.387762	0.26045	0.29	0.267	1
amon	0.388848	0.351476	0.494	0.517	1
Prosbeta2	0.393064	0.310604	0.344	0.35	1
Nop60B	0.394867	0.375464	0.305	0.3	1
QIL1	0.396764	0.265504	0.482	0.533	1
Pex19	0.401974	0.290054	0.417	0.417	1
Gie	0.402431	0.250918	0.414	0.433	1
Aos1	0.403821	0.261972	0.248	0.217	1
Vps60	0.405473	0.312657	0.347	0.333	1
mge	0.406521	0.296945	0.462	0.5	1
Hr38	0.406986	-0.737042	0.312	0.383	1
mEFTs	0.413019	0.260157	0.195	0.167	1
ssx	0.414159	0.253962	0.243	0.217	1
CG12279	0.4191	0.288777	0.295	0.283	1
CG7220	0.420693	0.36961	0.295	0.283	1
CG8417	0.425389	0.34444	0.309	0.3	1
Prx3	0.425845	0.349333	0.274	0.267	1
CG42339	0.42678	0.255004	0.182	0.15	1
nop5	0.431929	0.311565	0.243	0.217	1
RhoGDI	0.436217	0.316192	0.353	0.35	1
CG13220	0.438671	0.282463	0.272	0.25	1
Dph5	0.439968	0.260364	0.195	0.167	1
CG17059	0.441496	0.322171	0.421	0.467	1
CG4341	0.442409	0.344608	0.33	0.317	1
dpr8	0.443294	0.29401	0.558	0.6	1
side-VIII	0.446058	0.254525	0.215	0.183	1
Pdk	0.446378	0.313232	0.396	0.417	1
Ent3	0.454004	0.276092	0.351	0.35	1
Scgalpha	0.454819	0.295315	0.34	0.333	1
Mgat2	0.455539	0.272143	0.253	0.233	1
fred	0.461622	0.456699	0.37	0.367	1
rut	0.46169	0.34457	0.363	0.367	1
Prosbeta1	0.465747	0.326591	0.401	0.45	1
CG18815	0.468299	0.286109	0.468	0.533	1
Tsp97E	0.483146	0.258812	0.539	0.6	1
mbf1	0.484621	0.267333	0.531	0.617	1
CG44837	0.485854	0.340986	0.344	0.35	1
Inos	0.491561	0.295163	0.363	0.367	1
ct	0.50011	0.267766	0.353	0.333	1
Sec61alpha	0.500626	0.292407	0.393	0.4	1
CG33639	0.501565	0.417908	0.276	0.25	1
fl(2)d	0.503681	0.325823	0.339	0.35	1
Dscam3	0.508849	0.296872	0.173	0.15	1
CG15236	0.512627	0.274763	0.192	0.167	1
CG31705	0.514394	-0.521932	0.473	0.517	1
CG6024	0.524174	0.305301	0.445	0.467	1
CG13108	0.526222	0.263626	0.309	0.3	1
Rgk1	0.526648	0.349857	0.372	0.483	1
Akh	0.528514	0.435458	0.248	0.233	1
CG7430	0.529116	0.292198	0.4	0.433	1
Alg-2	0.532426	0.259421	0.443	0.483	1
Syx6	0.536116	0.289415	0.373	0.4	1
Roc1a	0.536939	0.261142	0.579	0.767	1
CCAP-R	0.538741	0.297749	0.175	0.15	1
Sh3beta	0.540432	0.28084	0.403	0.433	1
lncRNA:CR45332	0.544671	0.276897	0.223	0.2	1
su(w[a])	0.549299	0.308748	0.29	0.283	1
CG44153	0.554375	0.381609	0.25	0.25	1
CG12038	0.55482	0.288175	0.433	0.467	1
CG9686	0.558479	-0.531796	0.614	0.667	1
Nxt1	0.558746	0.2909	0.309	0.317	1
nAChRalpha3	0.56069	0.396979	0.545	0.6	1
Dscam2	0.566999	0.270491	0.534	0.7	1
CG32032	0.568621	0.290492	0.243	0.233	1
eas	0.569847	0.359058	0.3	0.317	1
CCT1	0.571471	0.279857	0.246	0.233	1
CG34351	0.57295	0.254193	0.171	0.15	1
wrd	0.57327	0.275066	0.277	0.283	1
RhoGAP19D	0.573644	0.278632	0.447	0.483	1
mRpS18A	0.588124	0.297596	0.328	0.333	1
CG4660	0.592429	0.282927	0.241	0.233	1
Tmtc3	0.594541	0.282227	0.267	0.267	1
CG42750	0.595345	0.304385	0.621	0.683	1
U2af38	0.609772	0.267949	0.223	0.217	1
CG11279	0.61274	0.276679	0.222	0.217	1
AP-1gamma	0.618912	0.301435	0.332	0.333	1
CG2765	0.622093	0.294142	0.222	0.217	1
ITP	0.625854	0.291748	0.276	0.333	1
CG43867	0.626277	0.281784	0.403	0.433	1
Doa	0.630133	0.269287	0.211	0.267	1
CG5455	0.631112	0.25683	0.194	0.183	1
bru1	0.636847	0.321093	0.276	0.267	1
Rpb5	0.641715	0.25874	0.237	0.233	1
Tif-IA	0.641886	0.270849	0.293	0.3	1
Tim8	0.644708	0.260083	0.433	0.483	1
CG1316	0.647507	0.259862	0.293	0.3	1
CG42239	0.651423	0.256782	0.204	0.2	1
twz	0.655002	0.268312	0.15	0.133	1
Lk	0.655643	0.635386	0.204	0.233	1
Crz	0.65611	0.683819	0.239	0.233	1
Pka-R1	0.657298	0.263785	0.531	0.6	1
luna	0.657454	0.283014	0.717	0.817	1
cnc	0.658282	-0.350304	0.119	0.133	1
hwt	0.664033	0.277271	0.569	0.667	1
CG11319	0.669304	0.322757	0.297	0.3	1
Sep1	0.675199	0.256686	0.173	0.167	1
CG43658	0.675967	0.475383	0.314	0.333	1
Kr-h2	0.676018	0.283622	0.393	0.433	1
CG32278	0.676578	0.273581	0.363	0.4	1
lqf	0.694305	0.250199	0.557	0.683	1
Echs1	0.702239	0.345263	0.239	0.25	1
Myo81F	0.703121	0.330717	0.216	0.217	1
dco	0.704077	0.281568	0.298	0.317	1
CG14075	0.716895	0.432153	0.22	0.217	1
EMC8-9	0.72174	0.257313	0.307	0.317	1
spidey	0.725397	0.260727	0.412	0.45	1
mAChR-A	0.76125	0.283768	0.342	0.417	1
REG	0.761399	0.288603	0.36	0.4	1
Toll-7	0.766534	0.265154	0.291	0.3	1
lncRNA:CR45223	0.772024	0.765268	0.106	0.1	1
CCHa2	0.79088	0.575879	0.204	0.2	1
CG17839	0.792399	0.335498	0.258	0.317	1
robo3	0.851495	0.275599	0.161	0.167	1
CG9164	0.85162	0.275734	0.305	0.35	1
beat-IV	0.870086	0.25733	0.232	0.25	1
Prosbeta4	0.870096	0.254322	0.372	0.433	1
CG5805	0.912813	0.266558	0.213	0.233	1
Nrk	0.913172	0.286921	0.291	0.333	1
CG43373	0.917701	0.250925	0.162	0.167	1
Tsp5D	0.940733	-0.297587	0.272	0.267	1
Flo2	0.958205	0.27713	0.415	0.5	1
SKIP	0.977617	0.375752	0.337	0.4	1

## Sheet: Neuropeptidergic cells
Columna1	p_val	avg_logFC	pct.1	pct.2	p_val_adj
Fkbp12	1.82085e-109	1.06626	0.973	0.952	2.56084e-105
mt:lrRNA	1.25817e-90	-0.876916	0.996	1	1.76949e-86
Pdcd4	6.8275e-75	-0.924211	0.726	0.965	9.60219e-71
awd	7.65573e-70	0.891726	0.912	0.87	1.0767e-65
kay	2.94754e-69	-1.43035	0.088	0.606	4.14541e-65
Xrp1	1.3825e-67	-1.35712	0.454	0.872	1.94435e-63
CG5059	2.97336e-67	-0.85408	0.233	0.758	4.18174e-63
CG30172	1.17565e-66	0.741326	0.951	0.916	1.65343e-62
RpL39	1.67637e-65	-0.518284	0.961	0.998	2.35764e-61
Eno	3.81923e-65	0.847138	0.984	0.978	5.37137e-61
REPTOR-BP	5.98123e-65	-0.804776	0.458	0.892	8.412e-61
unk	6.30178e-62	-0.838074	0.423	0.884	8.86282e-58
unc-104	9.94157e-59	-0.801288	0.513	0.912	1.39818e-54
puc	2.99314e-58	-1.06924	0.264	0.727	4.20955e-54
CG42258	6.36041e-58	-0.745592	0.352	0.82	8.94528e-54
CG45050	5.48476e-57	-0.693596	0.673	0.974	7.71377e-53
Ldh	2.70156e-56	0.961734	0.953	0.888	3.79947e-52
pAbp	4.22e-56	-0.539719	0.955	0.996	5.935e-52
Gapdh1	5.57492e-56	0.832013	0.984	0.983	7.84056e-52
CG42566	4.20585e-55	-0.68356	0.115	0.565	5.91511e-51
lncRNA:CR34335	5.79775e-55	-0.813942	0.949	0.991	8.15396e-51
CG43736	7.93942e-55	-0.917353	0.401	0.844	1.1166e-50
Arc1	2.70602e-54	-1.56951	0.057	0.492	3.80574e-50
Nrg	4.6838e-53	-0.679243	0.593	0.96	6.5873e-49
lncRNA:CR42862	1.25402e-52	-0.744138	0.462	0.868	1.76366e-48
CG9821	2.55939e-52	-0.659734	0.994	1	3.59953e-48
Pdk1	1.63095e-50	-0.808486	0.337	0.791	2.29377e-46
pre-rRNA:CR45845	1.73096e-50	-0.827337	0.305	0.734	2.43442e-46
His3.3B	2.39078e-50	-0.654563	0.701	0.965	3.36239e-46
ATPsynC	5.24019e-50	0.475735	1	0.983	7.36981e-46
RpL29	2.47076e-49	-0.423835	0.937	0.991	3.47488e-45
COX6B	4.45035e-48	0.682494	0.9	0.855	6.25898e-44
InR	4.22598e-47	-0.695417	0.517	0.897	5.94341e-43
MtnA	4.07908e-46	-0.691621	0.209	0.615	5.73682e-42
Glut4EF	2.02411e-45	-0.653332	0.646	0.96	2.8467e-41
Cyp1	1.10277e-44	0.469826	0.98	0.993	1.55094e-40
glec	1.74838e-43	-0.756617	0.452	0.837	2.45892e-39
CG8157	1.1856e-42	-0.48608	0.188	0.662	1.66743e-38
COX7A	7.48282e-41	0.632489	0.853	0.84	1.05238e-36
crp	7.99037e-41	-0.74243	0.552	0.895	1.12376e-36
CG11486	1.05163e-39	-0.671561	0.622	0.919	1.47902e-35
Gadd45	2.50101e-39	-1.06479	0.094	0.439	3.51742e-35
RpL41	2.91203e-39	-0.372257	0.986	0.996	4.09548e-35
14-3-3epsilon	3.29555e-39	0.448301	0.988	0.996	4.63486e-35
RpS14b	6.23774e-39	-0.532768	0.644	0.971	8.77276e-35
CG10082	9.74593e-39	-0.592712	0.337	0.723	1.37067e-34
CG2082	2.88348e-38	-0.430052	0.178	0.594	4.05532e-34
CG7879	3.38878e-38	-0.677882	0.202	0.567	4.76597e-34
CG11791	3.76057e-38	-0.769648	0.127	0.486	5.28887e-34
fok	5.75425e-38	-0.621194	0.481	0.855	8.09278e-34
Sirup	1.25272e-37	-0.519875	0.235	0.611	1.76183e-33
tsr	1.42313e-37	0.487334	0.922	0.961	2.00149e-33
Hsp83	3.76838e-37	0.973185	0.697	0.536	5.29985e-33
lncRNA:roX1	1.99667e-36	-0.547919	0.793	0.971	2.80811e-32
Unr	2.06973e-36	-0.514888	0.861	0.993	2.91087e-32
HmgD	2.47221e-36	-0.816868	0.869	0.971	3.47692e-32
sif	4.00554e-36	-0.620171	0.464	0.828	5.63339e-32
REPTOR	5.54798e-36	-0.562406	0.425	0.804	7.80268e-32
CG42392	8.25675e-36	-0.603432	0.521	0.875	1.16123e-31
l(1)G0469	8.23329e-35	-0.703755	0.067	0.383	1.15793e-30
LTV1	9.47634e-35	-0.488009	0.272	0.622	1.33275e-30
SNF4Agamma	1.26554e-34	-0.532605	0.307	0.668	1.77985e-30
Hsc70-4	1.36453e-34	0.481602	0.883	0.914	1.91907e-30
Tpi	1.58661e-34	0.628369	0.975	0.954	2.23141e-30
CG9328	1.61298e-34	-0.495172	0.233	0.62	2.2685e-30
CNBP	2.74855e-34	0.620002	0.779	0.829	3.86556e-30
sr	7.01929e-34	-0.963326	0.317	0.673	9.87193e-30
CG9686	9.264e-33	-0.576529	0.299	0.651	1.30289e-28
IscU	3.30851e-32	-0.428524	0.427	0.787	4.65309e-28
mt:ND2	3.39448e-32	-0.511419	0.374	0.717	4.774e-28
nmo	3.40595e-32	0.613902	0.906	0.883	4.79012e-28
CG44325	5.23546e-32	-0.479175	0.256	0.604	7.36316e-28
shrb	7.4162e-32	-0.435849	0.395	0.743	1.04301e-27
levy	9.16015e-32	0.511883	0.902	0.908	1.28828e-27
CG1572	9.55167e-32	-0.613664	0.192	0.539	1.34335e-27
CG42613	9.68076e-32	-0.52584	0.569	0.899	1.3615e-27
COX4	9.72124e-32	0.541888	0.857	0.859	1.36719e-27
sty	1.67464e-31	-0.651732	0.209	0.545	2.35521e-27
7B2	1.93025e-31	0.505776	0.888	0.862	2.7147e-27
Cyt-c-p	2.6044e-31	0.527176	0.93	0.95	3.66283e-27
sesB	6.4697e-31	0.392961	0.971	0.98	9.09898e-27
Non1	7.50056e-31	-0.485149	0.46	0.778	1.05488e-26
ATPsynF	1.14118e-30	0.477331	0.892	0.95	1.60495e-26
Thor	6.65982e-30	-0.597726	0.29	0.642	9.36637e-26
vari	7.72262e-30	-0.442357	0.162	0.484	1.08611e-25
lola	7.90445e-30	-0.528541	0.724	0.969	1.11168e-25
HmgZ	8.97301e-30	-0.75247	0.898	0.972	1.26196e-25
Arc2	1.78131e-29	-0.532474	0.016	0.262	2.50524e-25
mt:CoIII	2.31114e-29	-0.345601	0.969	0.996	3.25039e-25
stj	1.41412e-28	-0.405388	0.237	0.572	1.98882e-24
Lk6	1.43259e-28	-0.462632	0.646	0.925	2.01479e-24
ATPsynE	1.73761e-28	0.513418	0.824	0.842	2.44378e-24
CG9691	2.01038e-28	-0.441899	0.141	0.433	2.8274e-24
CG31635	3.13208e-28	-0.341113	0.344	0.688	4.40496e-24
Df31	3.57433e-28	0.376648	0.986	0.993	5.02693e-24
Act5C	3.81238e-28	0.385491	0.98	0.983	5.36172e-24
DCP2	3.90584e-28	-0.47896	0.397	0.734	5.49317e-24
CG42394	4.0671e-28	-0.650581	0.675	0.945	5.71997e-24
CG43222	4.53796e-28	0.721306	0.732	0.659	6.38219e-24
COX5B	5.04832e-28	0.521518	0.865	0.906	7.09996e-24
Oatp74D	9.02976e-28	-0.443716	0.086	0.371	1.26994e-23
CG7781	1.91364e-27	0.457028	0.928	0.936	2.69134e-23
CG12868	1.91574e-27	-0.558433	0.053	0.321	2.6943e-23
Imp	2.04661e-27	-0.437399	0.965	0.998	2.87835e-23
COX5A	2.30162e-27	0.482036	0.849	0.886	3.237e-23
CG13868	2.4959e-27	-0.40496	0.335	0.659	3.51024e-23
ctrip	3.31746e-27	-0.510741	0.19	0.488	4.66568e-23
wech	4.2454e-27	-0.429775	0.354	0.694	5.97072e-23
Sin3A	5.63712e-27	-0.486078	0.262	0.571	7.92804e-23
Rtnl1	1.02925e-26	-0.31847	0.894	0.994	1.44753e-22
Atf3	1.26738e-26	-0.415561	0.245	0.571	1.78244e-22
NaPi-III	1.48948e-26	-0.444947	0.53	0.855	2.0948e-22
CG9336	1.96967e-26	-0.276455	0.143	0.44	2.77014e-22
jhamt	4.04361e-26	-0.334017	0.037	0.281	5.68693e-22
eIF3l	6.23828e-26	-0.381238	0.372	0.672	8.77352e-22
Tsp42Ee	8.01094e-26	-0.561031	0.526	0.855	1.12666e-21
Pdp1	1.2021e-25	-0.465139	0.881	0.991	1.69063e-21
Shab	1.26024e-25	-0.439986	0.274	0.571	1.7724e-21
Rab7	2.24819e-25	-0.383184	0.342	0.642	3.16185e-21
Chmp1	7.40709e-25	-0.371822	0.423	0.739	1.04173e-20
CG7083	9.37533e-25	-0.354156	0.049	0.29	1.31855e-20
Fer2LCH	1.09939e-24	-0.388821	0.712	0.923	1.54619e-20
Smg6	1.13608e-24	-0.380778	0.178	0.459	1.59779e-20
lncRNA:Hsromega	1.26891e-24	-0.434186	0.888	0.989	1.78459e-20
CG4230	1.30351e-24	-0.479089	0.397	0.71	1.83325e-20
CG9413	1.3297e-24	-0.461617	0.391	0.708	1.87009e-20
COX7C	1.64388e-24	0.475818	0.865	0.875	2.31196e-20
Lis-1	1.67524e-24	-0.35709	0.511	0.824	2.35606e-20
tai	1.962e-24	-0.399552	0.593	0.905	2.75935e-20
RNASEK	2.6803e-24	0.382842	0.892	0.963	3.76958e-20
Fer1HCH	3.1757e-24	-0.351928	0.722	0.945	4.46631e-20
par-1	3.25777e-24	-0.440878	0.44	0.743	4.58172e-20
ftz-f1	4.25455e-24	-0.488889	0.09	0.345	5.9836e-20
CG44774	4.84356e-24	-0.591632	0.511	0.804	6.81198e-20
UQCR-11	5.39434e-24	0.517403	0.834	0.809	7.5866e-20
UbcE2H	6.47711e-24	-0.398745	0.104	0.361	9.10941e-20
mt:ATPase6	7.25527e-24	-0.360163	0.949	0.998	1.02038e-19
rudhira	8.32949e-24	-0.384429	0.483	0.796	1.17146e-19
cdc14	8.69232e-24	-0.406596	0.468	0.804	1.22249e-19
Adf1	8.83875e-24	-0.3226	0.227	0.536	1.24308e-19
phyl	9.09181e-24	-0.406117	0.352	0.651	1.27867e-19
Gs2	1.18938e-23	-0.304873	0.333	0.644	1.67274e-19
CG5830	1.56574e-23	-0.361693	0.288	0.587	2.20205e-19
Nplp2	1.62888e-23	-0.266939	0.495	0.879	2.29086e-19
hoip	1.70648e-23	0.756643	0.481	0.253	2.39999e-19
Psc	2.20898e-23	-0.455559	0.272	0.583	3.10671e-19
ATPsynO	2.35849e-23	0.555668	0.755	0.769	3.31698e-19
ATPsynCF6	2.43311e-23	0.482413	0.808	0.835	3.42193e-19
CG13907	3.32687e-23	-0.4499	0.217	0.501	4.67891e-19
Wbp2	5.50162e-23	-0.342457	0.188	0.466	7.73748e-19
CG18135	7.73574e-23	-0.337892	0.108	0.372	1.08795e-18
mt:ND1	9.18558e-23	-0.419122	0.65	0.943	1.29186e-18
ogre	9.97566e-23	-0.528379	0.153	0.409	1.40298e-18
Hsp67Bc	1.21673e-22	1.03194	0.63	0.455	1.71121e-18
mt:ND5	1.44679e-22	-0.385695	0.644	0.945	2.03477e-18
Mkp3	1.73184e-22	-0.556049	0.746	0.95	2.43566e-18
Spn55B	1.82441e-22	-0.439905	0.104	0.347	2.56585e-18
CG8369	2.13293e-22	-0.320945	0.243	0.527	2.99975e-18
Alk	2.17614e-22	-0.41875	0.65	0.927	3.06053e-18
orb2	2.68678e-22	-0.367442	0.38	0.706	3.77868e-18
Idgf6	2.86269e-22	-0.266154	0.115	0.371	4.02609e-18
Pglym78	3.11672e-22	0.489544	0.975	0.982	4.38336e-18
Appl	4.01889e-22	-0.383549	0.871	0.982	5.65217e-18
CG40191	4.3042e-22	-0.368783	0.225	0.501	6.05343e-18
UQCR-14	5.91004e-22	0.533134	0.806	0.84	8.31188e-18
PI31	9.16808e-22	-0.313565	0.321	0.602	1.2894e-17
CG14265	1.01034e-21	-0.253656	0.008	0.191	1.42094e-17
AMPdeam	1.09354e-21	-0.361236	0.297	0.578	1.53796e-17
fabp	1.30071e-21	0.648528	0.681	0.708	1.82932e-17
PHGPx	1.42931e-21	-0.356739	0.346	0.626	2.01019e-17
Uhg7	1.45654e-21	-0.357829	0.387	0.675	2.04848e-17
cv-2	1.61551e-21	-0.520283	0.121	0.374	2.27205e-17
Dak1	1.85295e-21	0.654807	0.748	0.655	2.60599e-17
CG1648	1.91926e-21	-0.551946	0.309	0.607	2.69925e-17
CASK	3.01458e-21	-0.404187	0.587	0.919	4.2397e-17
AnxB9	3.48327e-21	-0.79324	0.254	0.545	4.89888e-17
Smg5	4.17502e-21	-0.350468	0.196	0.468	5.87175e-17
Cp1	4.47095e-21	-0.325859	0.431	0.714	6.28794e-17
ref(2)P	4.53998e-21	-0.361423	0.241	0.505	6.38503e-17
RpL22	4.91223e-21	-0.404868	0.634	0.941	6.90856e-17
nSyb	7.54996e-21	0.427187	0.933	0.963	1.06183e-16
CG16711	8.12781e-21	-0.390319	0.403	0.699	1.14309e-16
chic	8.57497e-21	0.388524	0.941	0.985	1.20598e-16
Rab14	1.30496e-20	-0.264952	0.434	0.747	1.8353e-16
CG14441	1.35294e-20	-0.42717	0.119	0.35	1.90278e-16
UBL3	1.66628e-20	-0.276871	0.376	0.679	2.34346e-16
COX8	1.99831e-20	0.434955	0.818	0.884	2.81042e-16
CG30403	2.16706e-20	-0.456364	0.037	0.233	3.04775e-16
CG42554	2.32773e-20	-0.286207	0.08	0.306	3.27372e-16
mt:ND4	2.36503e-20	-0.351614	0.673	0.95	3.32619e-16
CG15098	3.10526e-20	-0.31648	0.166	0.411	4.36724e-16
CG1545	5.89309e-20	-0.305026	0.088	0.306	8.28804e-16
lbk	7.23385e-20	-0.298703	0.28	0.541	1.01737e-15
PyK	7.56872e-20	0.482922	0.902	0.95	1.06447e-15
Nlp	8.0839e-20	0.583796	0.679	0.761	1.13692e-15
cora	9.69817e-20	-0.312494	0.329	0.591	1.36395e-15
CG1910	1.04188e-19	-0.420082	0.278	0.536	1.4653e-15
vsg	1.49417e-19	-0.287072	0.235	0.492	2.10141e-15
CG32369	2.49057e-19	-0.279733	0.354	0.646	3.50274e-15
l(3)L1231	2.52033e-19	-0.311614	0.35	0.633	3.54459e-15
mt:ND3	2.54814e-19	-0.386247	0.407	0.69	3.5837e-15
GlcAT-P	3.22172e-19	-0.343398	0.294	0.567	4.53102e-15
CG5746	3.58854e-19	-0.350192	0.339	0.609	5.04692e-15
CalpA	4.16853e-19	-0.319935	0.123	0.347	5.86263e-15
pix	4.68719e-19	-0.29576	0.446	0.719	6.59206e-15
CG10375	5.27217e-19	-0.312188	0.249	0.512	7.41478e-15
Tspo	5.49174e-19	-0.280293	0.249	0.501	7.72358e-15
CG34404	5.54032e-19	-0.347445	0.18	0.42	7.79191e-15
shep	5.93576e-19	0.365416	0.992	0.998	8.34805e-15
Myb	7.84988e-19	-0.26026	0.215	0.473	1.10401e-14
Spred	9.60748e-19	-0.384572	0.626	0.895	1.3512e-14
CG9338	9.67105e-19	-0.403275	0.074	0.279	1.36014e-14
Zip99C	1.05791e-18	-0.252045	0.082	0.299	1.48785e-14
CG15628	1.20029e-18	-0.365756	0.493	0.785	1.68809e-14
FoxK	1.63472e-18	-0.271044	0.141	0.378	2.29907e-14
blw	1.84192e-18	0.402274	0.845	0.895	2.59047e-14
Ref1	2.1538e-18	-0.324311	0.474	0.771	3.0291e-14
Dhit	2.43842e-18	-0.402193	0.845	0.98	3.42939e-14
Dyb	2.47526e-18	-0.342388	0.252	0.495	3.48121e-14
CG12605	2.95585e-18	-0.295174	0.323	0.604	4.1571e-14
Act42A	3.12482e-18	0.554612	0.748	0.806	4.39475e-14
UQCR-Q	3.22009e-18	0.419871	0.804	0.853	4.52874e-14
CG10077	3.96454e-18	-0.290623	0.691	0.945	5.57573e-14
wge	4.2352e-18	-0.330706	0.198	0.433	5.95639e-14
CG3008	4.3312e-18	-0.309449	0.121	0.339	6.09141e-14
ATPsynbeta	4.36448e-18	0.379198	0.906	0.95	6.1382e-14
unc-119	4.49225e-18	-0.306267	0.421	0.708	6.31791e-14
CG14207	9.03591e-18	-0.383961	0.513	0.791	1.27081e-13
lncRNA:CR42491	9.32301e-18	0.36549	0.241	0.057	1.31119e-13
CG9425	1.0417e-17	-0.286345	0.35	0.617	1.46504e-13
ATPsynD	1.23004e-17	0.432055	0.798	0.868	1.72993e-13
CG5953	1.24102e-17	-0.312765	0.051	0.24	1.74537e-13
Caper	1.304e-17	-0.256222	0.436	0.73	1.83395e-13
hang	1.50589e-17	-0.288909	0.29	0.552	2.11788e-13
Jarid2	1.81909e-17	-0.25072	0.278	0.541	2.55837e-13
Ca-alpha1D	1.83579e-17	-0.284067	0.309	0.561	2.58186e-13
Hsp26	2.29103e-17	0.683962	0.497	0.308	3.2221e-13
CG7222	2.35745e-17	-0.267056	0.241	0.484	3.31552e-13
mam	3.23504e-17	-0.362723	0.46	0.741	4.54976e-13
CG15270	3.70364e-17	-0.283728	0.166	0.396	5.2088e-13
CG4467	4.61411e-17	-0.354236	0.35	0.606	6.48928e-13
sbr	4.73859e-17	-0.263283	0.11	0.319	6.66436e-13
dl	6.45762e-17	-0.471537	0.012	0.161	9.082e-13
ATPsyndelta	7.23169e-17	0.439918	0.769	0.807	1.01706e-12
simj	7.26235e-17	-0.380383	0.184	0.407	1.02138e-12
Past1	7.64667e-17	-0.326412	0.188	0.406	1.07543e-12
eIF5	7.93702e-17	-0.276038	0.438	0.741	1.11626e-12
Antp	8.36475e-17	-0.846457	0.016	0.169	1.17642e-12
Neb-cGP	1.03815e-16	0.405574	0.767	0.873	1.46006e-12
Bacc	1.13823e-16	-0.299889	0.99	0.998	1.6008e-12
Hk	1.41881e-16	-0.28899	0.495	0.806	1.99541e-12
cathD	1.60544e-16	-0.268251	0.348	0.606	2.25789e-12
aPKC	1.67774e-16	-0.29794	0.352	0.591	2.35957e-12
hig	3.0739e-16	-0.335835	0.245	0.494	4.32314e-12
CaMKII	3.15239e-16	0.480679	0.779	0.853	4.43353e-12
Rab18	4.02256e-16	-0.273946	0.247	0.468	5.65732e-12
Cow	4.96911e-16	-0.256999	0.47	0.747	6.98856e-12
Tsp42Ef	5.11004e-16	-0.466625	0.184	0.411	7.18676e-12
ewg	5.63396e-16	-0.251339	0.151	0.369	7.9236e-12
CG10527	5.95101e-16	-0.465191	0.241	0.462	8.36951e-12
Edc3	6.40294e-16	-0.328297	0.145	0.354	9.00509e-12
CG10737	7.16347e-16	-0.29811	0.129	0.33	1.00747e-11
path	7.56467e-16	-0.366833	0.315	0.56	1.06389e-11
Hsp67Ba	7.58077e-16	0.344151	0.141	0.011	1.06616e-11
hh	7.81439e-16	-0.28776	0.004	0.134	1.09902e-11
VhaM9.7-a	8.92253e-16	0.457408	0.796	0.853	1.25486e-11
RhoGEF2	9.77674e-16	-0.278187	0.022	0.172	1.375e-11
Sidpn	9.84649e-16	-0.378465	0.264	0.505	1.38481e-11
BuGZ	1.08706e-15	-0.290248	0.299	0.528	1.52884e-11
CG15784	1.1714e-15	-0.434752	0	0.123	1.64746e-11
Hers	1.2177e-15	-0.257936	0.339	0.587	1.71257e-11
lqf	1.7997e-15	-0.257986	0.526	0.796	2.53109e-11
Met	1.88364e-15	-0.262951	0.29	0.523	2.64915e-11
E2f2	2.56317e-15	-0.288715	0.074	0.253	3.60484e-11
CanB	2.77529e-15	0.470441	0.804	0.873	3.90317e-11
CG7646	3.06405e-15	0.381211	0.836	0.921	4.30928e-11
lid	3.55256e-15	-0.27977	0.344	0.587	4.99633e-11
ITP	4.3362e-15	-0.681321	0.245	0.472	6.09843e-11
Su(Tpl)	5.08702e-15	-0.256748	0.389	0.661	7.15438e-11
Jra	5.11915e-15	-0.301539	0.141	0.339	7.19957e-11
cer	5.46004e-15	-0.256432	0.133	0.339	7.679e-11
uzip	5.7969e-15	-0.264697	0.256	0.486	8.15277e-11
Vha26	6.13328e-15	0.454655	0.8	0.85	8.62585e-11
CG31030	6.24176e-15	0.449671	0.824	0.846	8.77841e-11
ATPsynG	7.87327e-15	0.342749	0.859	0.95	1.1073e-10
CG9628	8.01594e-15	-0.289785	0.035	0.191	1.12736e-10
CG5151	8.92689e-15	-0.339134	0.311	0.539	1.25548e-10
spir	1.16248e-14	-0.309741	0.207	0.42	1.63492e-10
Cp110	1.31583e-14	-0.250533	0.329	0.558	1.85058e-10
Ku80	1.42713e-14	-0.274182	0.035	0.183	2.00712e-10
Lk	1.51378e-14	-0.857548	0.112	0.306	2.12898e-10
Galphao	1.57494e-14	-0.302752	0.775	0.976	2.21499e-10
Vha13	1.74837e-14	0.311795	0.885	0.963	2.45891e-10
RpL24-like	1.83875e-14	-0.275507	0.62	0.872	2.58602e-10
agt	2.27831e-14	-0.252606	0.051	0.211	3.20421e-10
CHMP2B	2.45755e-14	-0.257256	0.133	0.319	3.45629e-10
Vha16-1	2.52071e-14	0.268601	0.967	0.998	3.54513e-10
sima	2.6519e-14	-0.252213	0.376	0.631	3.72964e-10
Mes4	2.76558e-14	-0.26572	0.102	0.284	3.88951e-10
stai	2.91882e-14	-0.296257	0.775	0.963	4.10504e-10
CG7630	3.13058e-14	0.350587	0.849	0.928	4.40285e-10
da	4.21441e-14	-0.266299	0.252	0.464	5.92715e-10
sun	4.40265e-14	0.44263	0.714	0.738	6.19188e-10
CG42795	4.7045e-14	-0.292984	0.178	0.378	6.61641e-10
cib	4.95429e-14	-0.373177	0.579	0.846	6.96772e-10
CG10283	5.16417e-14	-0.275175	0.063	0.228	7.26289e-10
Pkc98E	5.58078e-14	-0.274333	0.585	0.844	7.84881e-10
Mid1	6.71418e-14	-0.278325	0.628	0.888	9.44282e-10
CG17734	8.56093e-14	0.59762	0.575	0.429	1.20401e-09
CG14438	9.75272e-14	-0.292358	0.131	0.319	1.37162e-09
CG42361	1.37198e-13	0.617437	0.505	0.343	1.92956e-09
Myc	1.4212e-13	-0.272385	0.483	0.75	1.99877e-09
Ndae1	1.64369e-13	-0.250255	0.352	0.585	2.31168e-09
GlyP	1.7797e-13	0.547732	0.757	0.769	2.50297e-09
miple1	2.41597e-13	0.32596	0.978	0.987	3.39781e-09
Hug	2.57871e-13	-0.797119	0.252	0.457	3.62669e-09
CG42674	3.32404e-13	-0.378881	0.29	0.519	4.67492e-09
Proc	3.55105e-13	-0.837391	0.211	0.415	4.9942e-09
Nph	3.71837e-13	0.635904	0.503	0.391	5.22952e-09
lbm	3.88661e-13	-0.408483	0.098	0.268	5.46613e-09
Irbp18	3.94921e-13	-0.295753	0.17	0.352	5.55416e-09
CG31140	4.98328e-13	-0.264273	0.718	0.928	7.00849e-09
CG8910	5.69101e-13	-0.296514	0.135	0.317	8.00384e-09
Pcd	6.08267e-13	0.597822	0.564	0.446	8.55467e-09
rhea	1.21643e-12	-0.329001	0.297	0.528	1.71079e-08
CG9098	1.36695e-12	-0.253522	0.147	0.33	1.92248e-08
Vha14-1	1.86084e-12	0.427371	0.746	0.833	2.61708e-08
fs(1)h	1.94367e-12	-0.277278	0.71	0.949	2.73357e-08
spen	2.13791e-12	-0.288295	0.836	0.978	3.00675e-08
CG6762	2.99671e-12	-0.265652	0.125	0.292	4.21457e-08
lncRNA:roX2	3.50975e-12	-0.31123	0.642	0.877	4.93611e-08
sbb	3.96698e-12	0.380147	0.851	0.93	5.57916e-08
CG4022	4.0864e-12	-0.251822	0.174	0.358	5.74712e-08
CtBP	4.13395e-12	-0.270929	0.605	0.866	5.81399e-08
CG6610	5.20059e-12	0.326061	0.297	0.125	7.31412e-08
fru	9.41591e-12	-0.424087	0.074	0.22	1.32425e-07
blanks	1.16312e-11	-0.25894	0.008	0.11	1.63581e-07
Msp300	1.39691e-11	-0.295843	0.71	0.938	1.96461e-07
Ald	1.81911e-11	0.327641	0.998	0.998	2.5584e-07
CG32368	2.32171e-11	-0.266357	0.035	0.156	3.26526e-07
roh	2.66757e-11	0.355769	0.777	0.872	3.75168e-07
lwr	3.50978e-11	0.468814	0.652	0.661	4.93615e-07
lncRNA:CR40469	3.71515e-11	-0.314121	0.204	0.411	5.22498e-07
CG6310	3.88718e-11	-0.34265	0.063	0.198	5.46693e-07
Ilp5	4.6359e-11	1.40924	0.305	0.161	6.51992e-07
Ntf-2	5.75444e-11	0.506616	0.626	0.6	8.09304e-07
alphaTub84D	6.23702e-11	0.551614	0.609	0.56	8.77175e-07
CG5973	6.92155e-11	-0.285099	0.057	0.189	9.73446e-07
Su(z)2	1.14552e-10	-0.252177	0.135	0.294	1.61105e-06
mt:srRNA	1.43845e-10	-0.25234	0.139	0.294	2.02303e-06
Ptth	1.51083e-10	1.24531	0.106	0.013	2.12482e-06
hdc	2.90737e-10	0.321585	0.378	0.585	4.08892e-06
dpr7	3.34981e-10	0.492522	0.697	0.714	4.71118e-06
Pde8	3.44516e-10	-0.272911	0.207	0.376	4.84528e-06
Sh	3.57249e-10	0.34305	0.922	0.971	5.02435e-06
porin	3.82269e-10	0.257151	0.933	0.982	5.37623e-06
p23	3.96737e-10	0.359616	0.693	0.785	5.57971e-06
CG6329	4.25204e-10	0.343513	0.847	0.903	5.98006e-06
ND-ACP	4.36751e-10	0.385928	0.691	0.743	6.14246e-06
rho	4.89883e-10	-0.341977	0.049	0.169	6.88971e-06
VhaAC39-1	5.74373e-10	0.513087	0.65	0.653	8.07798e-06
CG11000	5.82448e-10	0.552948	0.757	0.758	8.19154e-06
pros	6.16578e-10	-0.450102	0.106	0.253	8.67155e-06
Eip75B	7.28433e-10	-0.309879	0.877	0.967	1.02447e-05
Pgk	1.11705e-09	0.396269	0.92	0.96	1.57102e-05
qvr	1.14534e-09	0.529241	0.656	0.606	1.6108e-05
GluClalpha	1.36173e-09	0.512874	0.634	0.606	1.91513e-05
CG14312	1.44128e-09	0.434777	0.681	0.739	2.02702e-05
Gs1l	1.92021e-09	0.560443	0.589	0.497	2.70059e-05
CG13364	2.65196e-09	0.336081	0.663	0.749	3.72972e-05
Got2	3.17282e-09	0.436827	0.339	0.187	4.46225e-05
CG30423	3.75853e-09	0.394731	0.667	0.692	5.28599e-05
Sod1	5.06673e-09	0.346562	0.699	0.798	7.12585e-05
Frq1	6.06682e-09	-0.309186	0.65	0.844	8.53237e-05
ND-B22	6.17457e-09	0.437524	0.679	0.71	8.68391e-05
CG14274	6.39581e-09	-0.37103	0.074	0.2	8.99507e-05
Mdh2	7.06139e-09	0.456146	0.681	0.69	9.93114e-05
RFeSP	1.92773e-08	0.341809	0.732	0.793	0.000271116
bma	1.99149e-08	0.507736	0.391	0.248	0.000280083
5-HT2A	2.7522e-08	-0.29343	0.094	0.222	0.000387069
PMCA	2.82671e-08	0.343827	0.728	0.754	0.000397548
NHP2	4.31244e-08	0.499839	0.397	0.275	0.000606501
CG4612	4.45901e-08	0.416337	0.691	0.761	0.000627115
Tom7	4.92884e-08	0.332927	0.661	0.758	0.000693193
pan	5.36774e-08	0.414645	0.712	0.765	0.00075492
bin3	6.38427e-08	-0.266565	0.207	0.336	0.000897884
Gapdh2	8.13557e-08	0.25419	0.996	0.998	0.00114419
SelT	9.76541e-08	0.472794	0.511	0.413	0.00137341
Pfdn6	1.23343e-07	0.467668	0.569	0.572	0.00173469
Ten-a	1.45124e-07	0.386895	0.912	0.95	0.00204102
eIF1A	1.75236e-07	0.297727	0.775	0.844	0.00246452
mtSSB	1.76972e-07	0.371923	0.346	0.217	0.00248894
cbt	1.83736e-07	-0.298576	0.155	0.286	0.00258406
jim	1.96128e-07	-0.329099	0.818	0.938	0.00275835
kek1	2.12588e-07	0.603653	0.663	0.646	0.00298984
SmD2	2.40258e-07	0.498626	0.509	0.461	0.00337899
Crk	2.49195e-07	0.500657	0.532	0.47	0.00350468
twit	2.83314e-07	-0.543581	0.188	0.321	0.00398453
NPF	3.55719e-07	2.09615	0.153	0.057	0.00500283
Nlg3	3.66491e-07	0.533756	0.654	0.618	0.00515432
CG6770	3.93022e-07	-0.267391	0.789	0.923	0.00552746
Ran	4.51299e-07	0.369032	0.628	0.705	0.00634707
Hs3st-B	5.20248e-07	0.289409	0.209	0.101	0.00731677
Nlg2	6.9669e-07	0.472767	0.622	0.639	0.00979825
Hrb98DE	7.42476e-07	0.444972	0.626	0.637	0.0104422
Sec61gamma	7.86731e-07	0.389678	0.63	0.703	0.0110646
SkpA	8.37237e-07	0.305941	0.681	0.806	0.0117749
Csp	8.82328e-07	0.413132	0.667	0.662	0.0124091
side-II	8.95709e-07	0.567144	0.434	0.334	0.0125973
CG42750	1.15413e-06	0.548909	0.575	0.523	0.0162317
Akh	1.25729e-06	-1.52532	0.1	0.202	0.0176826
CG5065	1.76855e-06	0.464489	0.673	0.692	0.024873
CG17816	1.90687e-06	0.352206	0.634	0.655	0.0268182
Rsf1	2.664e-06	0.423906	0.673	0.721	0.0374665
SNRPG	2.94493e-06	0.4208	0.544	0.561	0.0414175
klg	3.06725e-06	0.669007	0.658	0.67	0.0431378
Set	3.33796e-06	0.444649	0.47	0.387	0.0469451
DopEcR	4.1124e-06	0.423794	0.665	0.644	0.0578369
CG11267	4.25299e-06	0.328877	0.679	0.758	0.0598141
Pomp	4.51834e-06	0.474536	0.497	0.466	0.0635459
MFS3	4.63028e-06	0.453539	0.622	0.615	0.0651203
SpdS	4.71515e-06	0.287366	0.258	0.15	0.0663138
CG8245	5.67159e-06	0.467717	0.495	0.415	0.0797652
UQCR-C2	7.66374e-06	0.346685	0.667	0.712	0.107783
Vmat	8.57093e-06	-0.297245	0.217	0.343	0.120542
CG14186	8.63833e-06	-0.318513	0.288	0.413	0.121489
ND-B16.6	8.73759e-06	0.363877	0.656	0.712	0.122885
ATPsyngamma	9.21125e-06	0.295763	0.761	0.864	0.129547
Rap1	9.96287e-06	0.267041	0.806	0.905	0.140118
CG43324	1.04065e-05	0.270497	0.699	0.765	0.146357
eIF1	1.09712e-05	0.292432	0.701	0.833	0.154299
Roc1a	1.22759e-05	0.360857	0.626	0.67	0.172648
Pfdn2	1.35375e-05	0.422388	0.54	0.532	0.190391
Fas3	1.5352e-05	0.707124	0.352	0.257	0.21591
CG3760	1.87328e-05	0.400161	0.427	0.339	0.263459
Rpb5	2.09291e-05	0.386247	0.362	0.255	0.294346
Pdf	2.45245e-05	1.43298	0.17	0.081	0.344913
CG6712	2.61145e-05	0.274397	0.192	0.103	0.367275
Hsp27	2.77111e-05	0.392563	0.337	0.242	0.389729
Sptr	3.04658e-05	0.260357	0.215	0.121	0.428471
5-HT1A	3.06015e-05	0.57827	0.538	0.483	0.430379
ND-B14	3.54243e-05	0.416698	0.63	0.67	0.498207
Sec61beta	3.61958e-05	0.365829	0.593	0.679	0.509057
CG2862	3.64001e-05	0.410802	0.507	0.534	0.511931
nAChRalpha6	4.252e-05	0.281682	0.949	0.974	0.598001
Tsp42Ej	5.06559e-05	0.32304	0.689	0.734	0.712425
Pfdn5	5.91859e-05	0.388851	0.526	0.512	0.832391
ND-15	6.80826e-05	0.403737	0.575	0.593	0.957514
Tim9a	7.79027e-05	0.375746	0.417	0.35	1
Dop1R1	8.11445e-05	0.350487	0.223	0.138	1
B52	9.1008e-05	0.305905	0.677	0.756	1
Nop56	9.37282e-05	0.395188	0.387	0.303	1
Nop60B	0.000103021	0.417992	0.454	0.38	1
AP-2sigma	0.000121696	0.255509	0.744	0.864	1
Jafrac1	0.000124564	0.335554	0.609	0.754	1
PIP4K	0.000125364	0.45062	0.536	0.516	1
Pgm	0.0001307	0.444204	0.593	0.6	1
Pka-C1	0.000137555	0.255505	0.781	0.894	1
Non2	0.000149743	0.416565	0.558	0.587	1
AANAT1	0.000153961	0.366871	0.292	0.202	1
Capa	0.000164777	-1.39245	0.072	0.139	1
CG9919	0.000177041	0.426219	0.64	0.65	1
Sms	0.000177214	0.373572	0.413	0.332	1
Men	0.000214899	0.409321	0.579	0.569	1
Inos	0.000217998	0.488887	0.411	0.339	1
VAChT	0.000254697	0.439519	0.505	0.464	1
CG11360	0.000272759	0.360283	0.479	0.428	1
aay	0.000319697	0.423924	0.286	0.204	1
SC35	0.000389555	0.40309	0.472	0.422	1
asRNA:CR45520	0.000400782	0.269723	0.155	0.086	1
DnaJ-1	0.000420727	0.277223	0.344	0.248	1
CG43737	0.000422996	0.339695	0.652	0.694	1
Phb2	0.000438568	0.373959	0.448	0.38	1
mRpL55	0.000527906	0.312624	0.429	0.356	1
Vha36-1	0.000591165	0.265643	0.773	0.872	1
CCT3	0.000647577	0.370582	0.429	0.376	1
CG5885	0.00067245	0.365635	0.46	0.439	1
Pvf3	0.000725868	0.67331	0.389	0.321	1
ND-MLRQ	0.000739484	0.261436	0.759	0.875	1
CG11137	0.000781236	0.406846	0.499	0.486	1
Ms	0.000833437	0.288444	0.446	0.618	1
ND-B15	0.000955897	0.350825	0.546	0.567	1
Parp	0.00100105	0.332902	0.366	0.292	1
luna	0.00100559	0.405949	0.632	0.672	1
CG17514	0.00101012	0.369656	0.546	0.538	1
spt4	0.00107485	0.335516	0.372	0.295	1
CG40498	0.00112173	0.364241	0.558	0.539	1
Ktl	0.00119148	0.422559	0.509	0.481	1
GstZ2	0.00128364	0.423458	0.536	0.644	1
Dad1	0.00130713	0.342149	0.517	0.534	1
dpr21	0.00133705	0.408179	0.558	0.569	1
Vha68-1	0.00135135	0.375058	0.642	0.664	1
CG31460	0.00140516	0.328774	0.344	0.27	1
Eaat2	0.00142611	0.333293	0.245	0.176	1
lncRNA:noe	0.00144704	-0.478131	0.235	0.327	1
CG42339	0.00171065	0.299287	0.168	0.106	1
CG5676	0.00172358	0.303334	0.618	0.723	1
Fife	0.00178162	0.365302	0.466	0.422	1
NP15.6	0.00179707	0.338527	0.56	0.578	1
Rab27	0.00181329	0.384549	0.485	0.437	1
SIFa	0.00207932	-0.290699	0.266	0.356	1
CaBP1	0.00216287	0.350271	0.393	0.33	1
sdt	0.0022716	0.30404	0.761	0.875	1
La	0.00229815	0.271276	0.315	0.253	1
p120ctn	0.00239283	0.279601	0.658	0.774	1
Hsp60A	0.00260659	0.34367	0.515	0.484	1
AIMP3	0.00284752	0.384584	0.507	0.506	1
eEF1delta	0.00285999	0.332806	0.45	0.451	1
beat-Ic	0.0029565	0.523368	0.417	0.38	1
vig2	0.00299672	0.346799	0.571	0.657	1
CG7971	0.00306507	0.325002	0.626	0.675	1
eIF4H1	0.00328527	0.271321	0.593	0.631	1
vig	0.00336434	0.337457	0.646	0.694	1
CG43729	0.00338442	0.323304	0.679	0.703	1
CG42342	0.00356402	0.374125	0.616	0.609	1
SmF	0.00361844	0.306885	0.393	0.35	1
dj-1beta	0.00364996	0.353341	0.487	0.475	1
ND-B17	0.00366347	0.333301	0.519	0.484	1
CG13408	0.00384596	0.395939	0.219	0.158	1
SelD	0.00394743	0.2717	0.258	0.185	1
nAChRbeta1	0.00403933	0.390994	0.628	0.661	1
CG45263	0.00418849	0.52131	0.511	0.49	1
CG13108	0.00421686	0.449454	0.331	0.27	1
Dop1R2	0.00428773	0.28548	0.184	0.123	1
GluRIB	0.00437043	0.353253	0.542	0.528	1
P32	0.00461594	0.325985	0.436	0.413	1
Ptp99A	0.00463519	0.419042	0.73	0.862	1
CG9368	0.00465166	0.323247	0.391	0.323	1
Sema2b	0.00489031	0.379739	0.297	0.239	1
Pfdn1	0.00516661	0.311427	0.454	0.424	1
CG3262	0.00521361	0.388766	0.44	0.391	1
mago	0.00551443	0.374122	0.46	0.429	1
CG14075	0.00563738	-0.912204	0.082	0.136	1
CG10470	0.00766674	0.385683	0.429	0.404	1
uex	0.00793517	0.355469	0.587	0.655	1
Cyt-c1	0.00889762	0.336011	0.571	0.596	1
PPP4R2r	0.00897193	0.337966	0.36	0.317	1
Hrb87F	0.00925439	0.338657	0.472	0.453	1
Cals	0.0093529	0.307183	0.601	0.73	1
SmE	0.0102418	0.344759	0.466	0.488	1
Rpn9	0.0103019	0.28266	0.37	0.328	1
ct	0.0103181	0.525381	0.431	0.376	1
mahe	0.011123	0.372625	0.448	0.428	1
Fkbp39	0.0115472	0.329383	0.417	0.417	1
Phf5a	0.0122071	0.276672	0.368	0.328	1
Hel25E	0.0122281	0.347367	0.499	0.521	1
EMRE	0.0123427	0.262483	0.53	0.508	1
beat-IIa	0.0129038	0.398609	0.431	0.409	1
l(1)10Bb	0.0137628	0.253165	0.294	0.231	1
ND-13B	0.013972	0.340235	0.485	0.472	1
CG17715	0.0149124	0.314182	0.321	0.268	1
mRpS18A	0.0150014	0.303827	0.409	0.371	1
CG8223	0.0154962	0.270493	0.303	0.25	1
CG32017	0.0155274	0.592555	0.558	0.587	1
lncRNA:CR45312	0.0160509	0.3842	0.157	0.108	1
beat-VII	0.0162191	0.369638	0.411	0.382	1
CG34132	0.0182715	0.285196	0.501	0.527	1
Mlf	0.0184421	0.338576	0.622	0.677	1
Gprk2	0.0199413	0.274893	0.472	0.451	1
dpr1	0.0203789	0.412255	0.544	0.541	1
CG17493	0.0218668	0.328646	0.483	0.457	1
lncRNA:CR44978	0.0221216	0.303559	0.145	0.103	1
Gs1	0.0225181	0.410299	0.474	0.466	1
mRpS24	0.0226233	0.269661	0.333	0.275	1
CG2680	0.0229096	0.312838	0.301	0.246	1
SmB	0.0241764	0.331023	0.519	0.576	1
CG43795	0.0270133	0.306563	0.223	0.174	1
D1	0.0282463	0.315419	0.585	0.661	1
nop5	0.0282856	0.282153	0.356	0.308	1
CG10465	0.0285666	0.304107	0.391	0.358	1
spab	0.0286712	0.437107	0.29	0.239	1
CG6878	0.0294411	0.34081	0.411	0.387	1
ND-PDSW	0.0296235	0.269557	0.599	0.661	1
Arl4	0.0309232	0.304007	0.573	0.622	1
mRpL35	0.0314751	0.292496	0.309	0.264	1
CG8860	0.032055	0.282061	0.532	0.651	1
Rac1	0.032248	0.295699	0.611	0.708	1
jdp	0.0331312	0.377345	0.759	0.831	1
CG10674	0.0339147	0.323687	0.401	0.374	1
CG31221	0.0355376	-0.342521	0.736	0.866	1
CG18815	0.0380047	0.396946	0.521	0.541	1
ND-30	0.0394672	0.311155	0.511	0.501	1
Gp93	0.040509	0.284325	0.337	0.301	1
fz	0.0418736	0.35632	0.354	0.327	1
GABA-B-R1	0.0418909	0.287579	0.654	0.723	1
acj6	0.0435034	0.543749	0.108	0.077	1
CG32700	0.0437584	0.477025	0.575	0.607	1
Gad1	0.0448471	0.289824	0.268	0.332	1
CG14817	0.0450242	0.255632	0.378	0.347	1
Lim1	0.0472026	0.414708	0.372	0.363	1
GlcAT-S	0.048244	0.257471	0.164	0.123	1
CG44242	0.0484439	0.293928	0.517	0.543	1
Scamp	0.0494707	0.37324	0.481	0.484	1
Maf1	0.049765	0.303283	0.425	0.4	1
natalisin	0.0518708	0.551798	0.08	0.117	1
fred	0.0520162	0.336099	0.391	0.367	1
Con	0.0523196	0.368635	0.493	0.49	1
Hr38	0.0529274	-0.433117	0.282	0.338	1
CG4101	0.0558889	0.324855	0.438	0.424	1
CG8036	0.0594853	0.287485	0.417	0.396	1
CG32544	0.059799	0.28384	0.303	0.262	1
side	0.0598837	0.327229	0.521	0.556	1
lov	0.0642904	0.256353	0.141	0.105	1
CG11444	0.0655607	0.34021	0.44	0.417	1
l(1)G0156	0.0697893	0.257137	0.611	0.628	1
Octalpha2R	0.0720244	0.380386	0.434	0.42	1
PDCD-5	0.07332	0.280727	0.374	0.352	1
CCT5	0.0738134	0.272091	0.395	0.393	1
CG11811	0.0773862	0.33976	0.409	0.398	1
CG44153	0.0781224	0.368206	0.274	0.242	1
AstA	0.078678	0.695018	0.119	0.086	1
CG18428	0.0788337	0.254125	0.315	0.277	1
Ccn	0.0800723	0.286728	0.204	0.169	1
CG32982	0.0805256	0.344461	0.299	0.268	1
RnpS1	0.0832706	0.270747	0.393	0.354	1
Tsp97E	0.0837061	0.287508	0.566	0.617	1
CG11317	0.089766	0.365993	0.315	0.288	1
Scsalpha1	0.0910429	0.274278	0.546	0.576	1
Nedd8	0.0910611	0.263244	0.458	0.484	1
Tim8	0.0917742	0.309561	0.481	0.521	1
dod	0.0918598	0.276295	0.419	0.417	1
l(2)37Cc	0.0939057	0.331597	0.425	0.406	1
vvl	0.0982854	0.258587	0.382	0.477	1
cmpy	0.101748	0.34995	0.538	0.58	1
eIF3j	0.101892	0.318424	0.403	0.389	1
Crz	0.102166	1.17153	0.264	0.213	1
beat-Ib	0.106669	0.265316	0.333	0.31	1
Tapdelta	0.109435	0.304847	0.519	0.591	1
CG6024	0.112548	0.302901	0.466	0.483	1
beat-Ia	0.112572	0.556102	0.239	0.213	1
caps	0.113052	0.280187	0.225	0.196	1
TER94	0.116064	0.264307	0.427	0.415	1
CG7637	0.118435	0.254719	0.401	0.446	1
AGBE	0.119137	0.263139	0.166	0.136	1
Fkbp59	0.126479	0.275392	0.44	0.451	1
Cnx99A	0.128975	0.28914	0.456	0.461	1
CG13920	0.13888	0.251563	0.63	0.771	1
Fib	0.139136	0.28661	0.35	0.33	1
Octbeta1R	0.143416	0.343946	0.444	0.435	1
CG10565	0.14658	0.289113	0.299	0.272	1
ND-B17.2	0.147891	0.284127	0.532	0.593	1
CG9922	0.155865	0.260349	0.397	0.38	1
CG43902	0.156717	0.334814	0.233	0.206	1
twz	0.158482	0.283081	0.135	0.11	1
Spn	0.161274	0.280947	0.534	0.617	1
tko	0.165387	0.277688	0.384	0.369	1
Prosalpha5	0.171258	0.302052	0.468	0.501	1
Droj2	0.174367	0.297071	0.524	0.571	1
prtp	0.179972	0.266141	0.409	0.404	1
Prosbeta2	0.180015	0.288593	0.44	0.461	1
beat-Vb	0.191948	0.298184	0.188	0.163	1
CG42322	0.192369	0.279539	0.444	0.428	1
CG13739	0.193577	0.404475	0.348	0.33	1
His2Av	0.195001	0.252762	0.569	0.69	1
Pfdn4	0.196312	0.316147	0.509	0.572	1
mspo	0.197618	0.427098	0.519	0.583	1
AstC	0.20886	0.881896	0.217	0.182	1
Optix	0.211194	0.391215	0.204	0.183	1
dpr6	0.213767	0.304744	0.374	0.437	1
EloC	0.215611	0.258641	0.54	0.615	1
beat-IV	0.225499	0.266023	0.204	0.185	1
mRpL52	0.226573	0.286305	0.37	0.356	1
CG7191	0.228639	0.413533	0.166	0.143	1
CG43867	0.231525	0.30384	0.462	0.475	1
twr	0.233266	0.260741	0.479	0.549	1
kdn	0.233351	0.265016	0.301	0.279	1
CG12107	0.241707	0.273456	0.315	0.295	1
ND-19	0.24342	0.280632	0.493	0.523	1
CG3566	0.250912	0.254681	0.399	0.396	1
CG9391	0.256862	0.257199	0.436	0.462	1
Syn1	0.258569	0.365103	0.415	0.429	1
Mp	0.259594	0.302536	0.444	0.453	1
CG30463	0.265698	0.280298	0.252	0.228	1
ND-ASHI	0.273833	0.26121	0.528	0.569	1
GCS2alpha	0.2791	0.333628	0.427	0.437	1
Pfk	0.280754	0.254509	0.579	0.651	1
Dh31	0.282646	0.639067	0.321	0.301	1
Rab26	0.282716	0.399445	0.505	0.56	1
CG31715	0.299231	0.276679	0.495	0.541	1
dpr13	0.304165	0.253852	0.47	0.483	1
CG14321	0.316647	0.28815	0.468	0.49	1
beat-VI	0.317434	0.310894	0.421	0.431	1
CG13300	0.325882	0.253805	0.194	0.176	1
CG1161	0.329451	0.311436	0.489	0.516	1
VGlut	0.334235	0.772598	0.503	0.593	1
CG8397	0.339442	0.286504	0.389	0.391	1
CG42340	0.347003	0.340351	0.403	0.409	1
beat-IIIb	0.363159	0.324214	0.378	0.391	1
robl	0.374371	0.253881	0.505	0.587	1
Task6	0.377723	0.328625	0.393	0.396	1
beat-Va	0.382593	0.290776	0.235	0.224	1
Corin	0.390524	0.296249	0.344	0.343	1
dpr11	0.40575	0.326468	0.321	0.321	1
Atox1	0.411155	0.293809	0.384	0.387	1
ND-B18	0.413463	0.263934	0.513	0.6	1
Dh44	0.421215	0.533212	0.149	0.132	1
Pp2B-14D	0.424825	0.261579	0.321	0.319	1
CG5446	0.427765	0.254025	0.524	0.569	1
Tom40	0.461588	0.258766	0.333	0.33	1
mbf1	0.489754	0.254574	0.569	0.668	1
beat-Vc	0.490428	0.322265	0.204	0.204	1
ERp60	0.496559	0.267078	0.46	0.516	1
wry	0.558795	0.301727	0.47	0.528	1
CG3618	0.562228	0.269266	0.28	0.275	1
DIP-theta	0.562334	0.324909	0.141	0.132	1
Ubc10	0.570816	0.261206	0.417	0.435	1
CG17193	0.573969	0.25586	0.294	0.294	1
nAChRalpha3	0.575457	0.3128	0.485	0.576	1
Sod2	0.576307	0.269941	0.417	0.461	1
br	0.581627	0.281787	0.454	0.477	1
CG7220	0.583583	0.27994	0.35	0.358	1
pico	0.59846	0.277504	0.458	0.494	1
Mip	0.599556	-0.700954	0.112	0.119	1
CG14591	0.603583	0.295508	0.405	0.428	1
CG17716	0.609248	0.359575	0.511	0.596	1
Gfrl	0.64084	0.264018	0.268	0.264	1
Nplp1	0.646811	-1.036	0.237	0.268	1
Dd	0.651979	0.260866	0.356	0.371	1
CG43689	0.661368	0.271349	0.19	0.193	1
Syt7	0.677549	0.261074	0.511	0.582	1
Pkc53E	0.679161	0.27845	0.669	0.765	1
CG12071	0.733746	0.269976	0.491	0.543	1
heph	0.744528	0.289814	0.611	0.712	1
CG43658	0.763317	0.267245	0.323	0.336	1
shakB	0.765439	0.336164	0.446	0.49	1
dpr10	0.808685	0.270532	0.241	0.253	1
CG10804	0.813334	0.2529	0.339	0.367	1
CG13585	0.865361	0.252875	0.515	0.563	1
Dsk	0.873016	-0.789913	0.182	0.176	1
bi	0.880884	0.27567	0.327	0.345	1
beat-IIIc	0.883436	0.301628	0.299	0.316	1
Bgb	0.901591	0.284664	0.47	0.53	1
CG30116	0.909063	0.305677	0.335	0.371	1
jigr1	0.917206	0.272058	0.387	0.417	1
Mmp2	0.917259	0.340042	0.311	0.317	1
CG8861	0.939002	0.326206	0.337	0.361	1
CG12594	0.977056	0.253856	0.227	0.237	1
Ilp2	0.981102	0.287626	0.37	0.499	1
Kank	0.992975	0.264946	0.468	0.53	1
ImpL2	0.998627	-0.316259	0.18	0.176	1

[truncated: 6 more sheets: Neuroblats, OLE, Prothoracic gland, UNs 1, C32.changes, Hoja1]
