# Supplementary figures and images for: Single cell transcriptome atlas of the Drosophila larval brain
Source: eLife journal article supplement (doi:10.7554/elife.50354), 2019-11-20

**Figure 3 - Figure supplement 1**

**A**

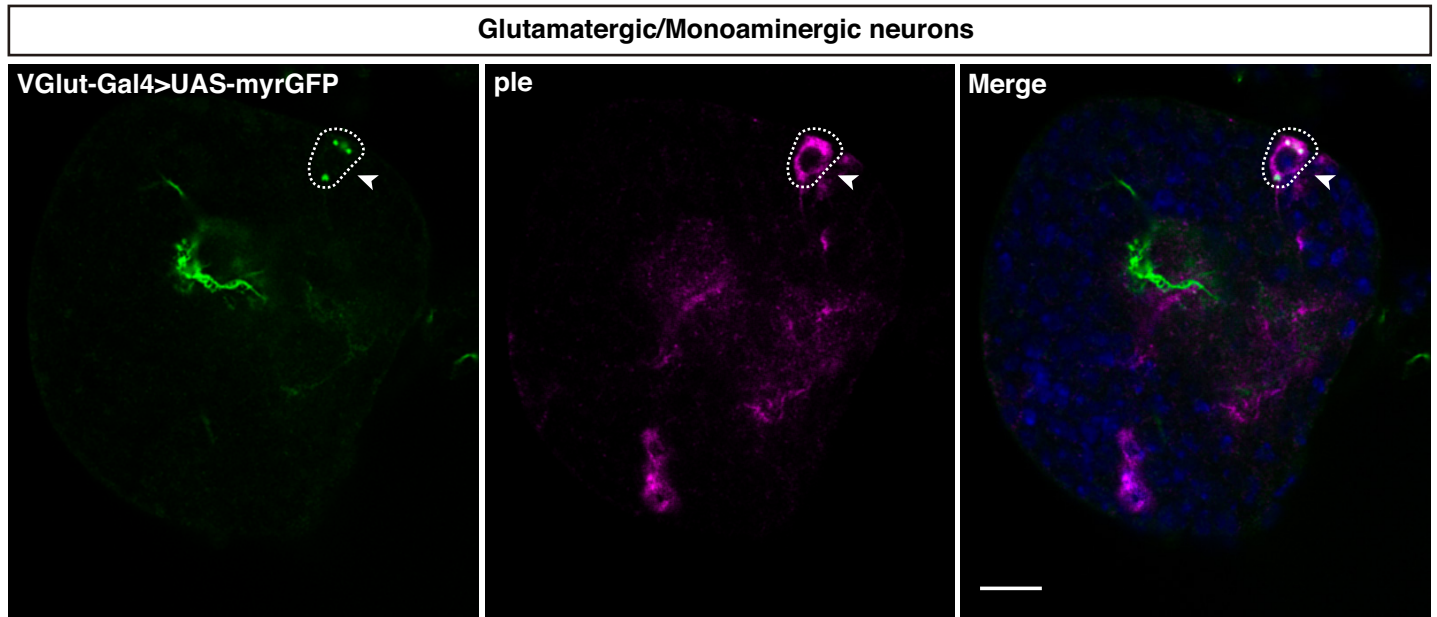

**B**

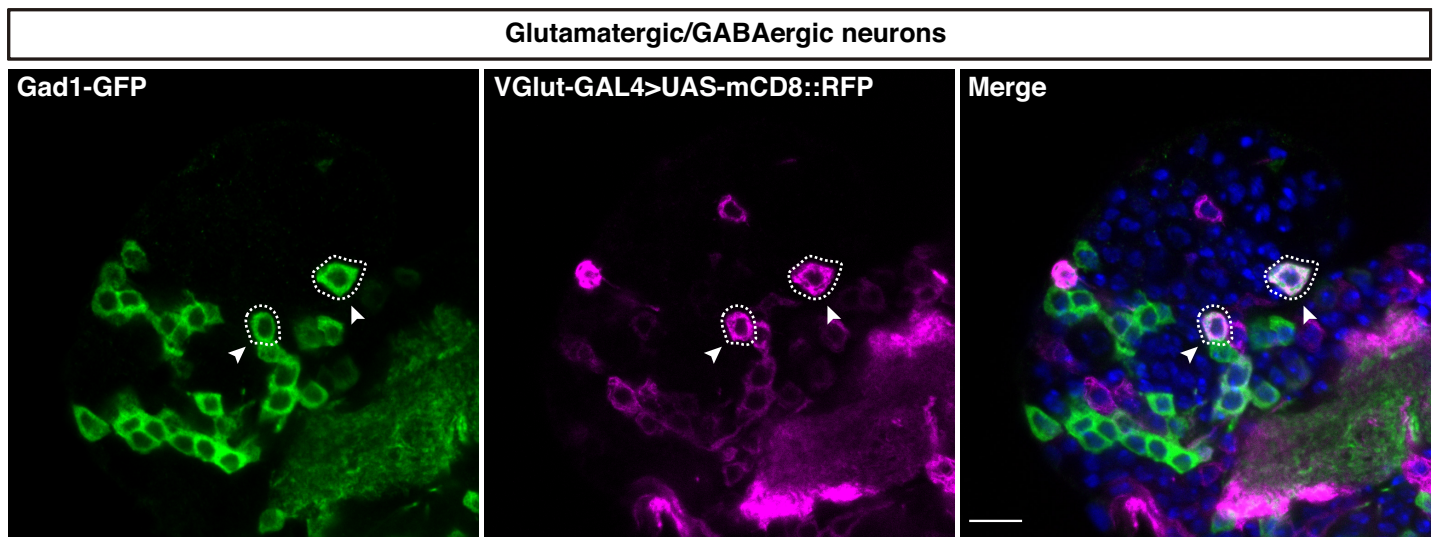

**C**

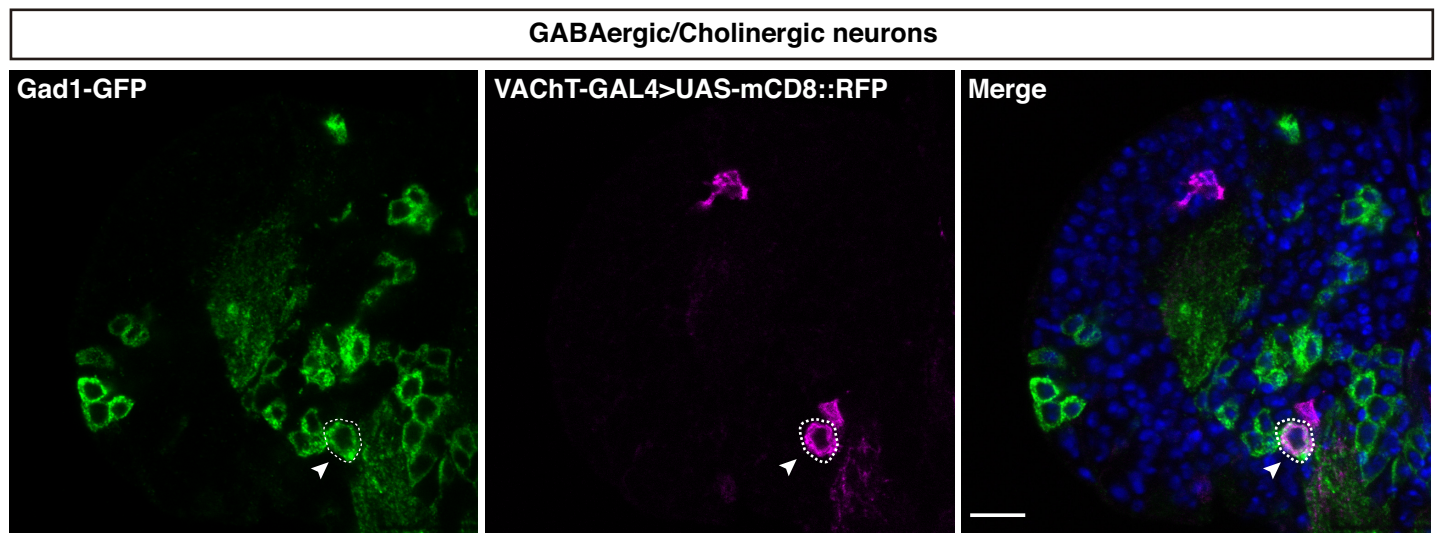

Supplement: supp [file elife-50354-supp-v1.zip]

# Figure 7 - Figure supplement 3

## A

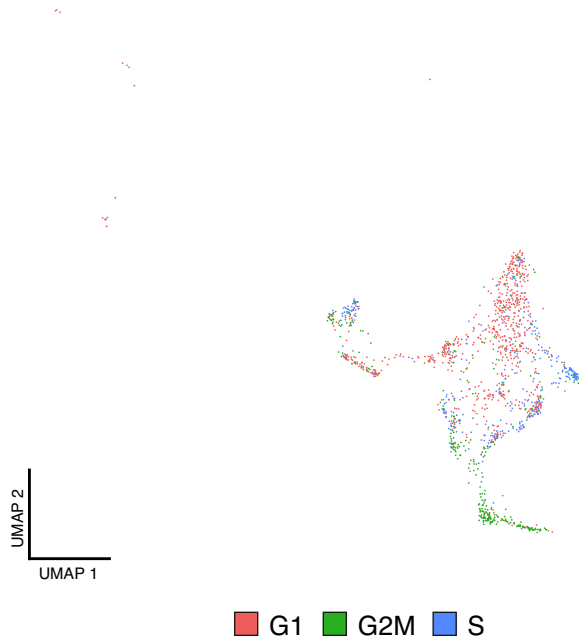

## B

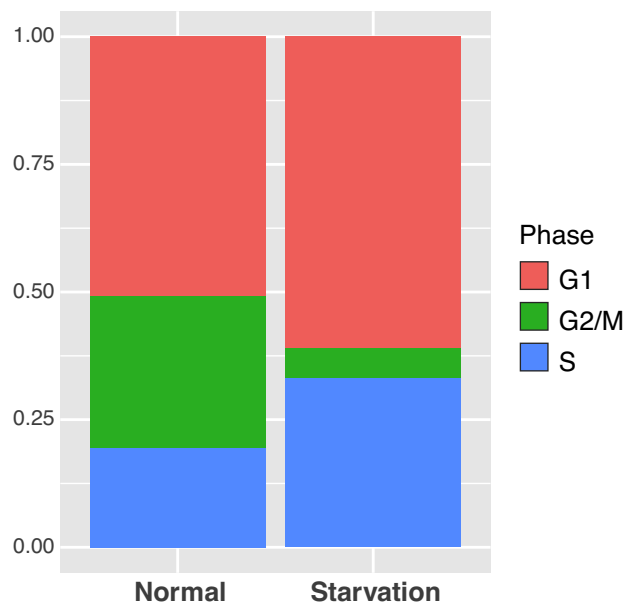

Supplement: supp [file elife-50354-supp-v1.zip]

## Normal

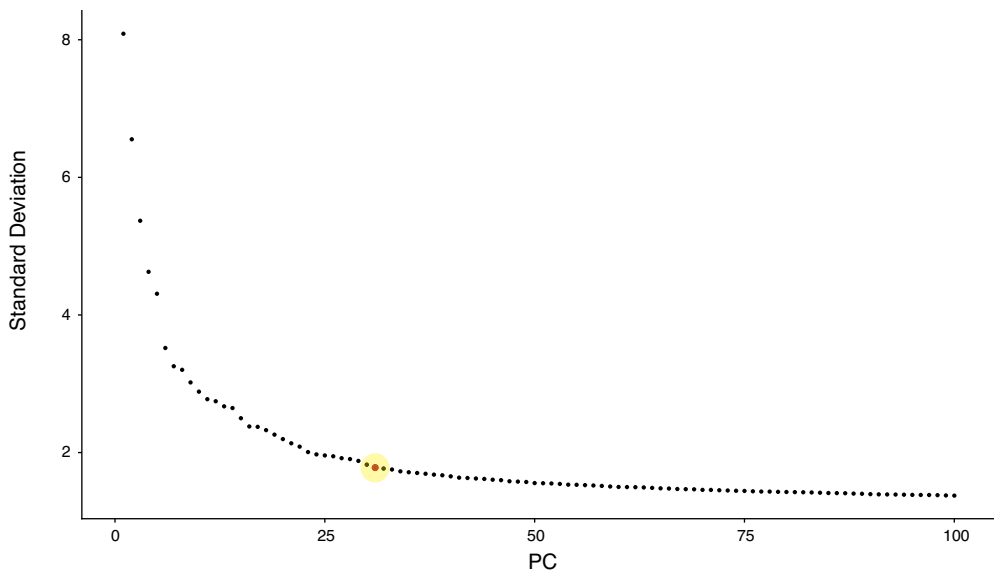

## Starvation

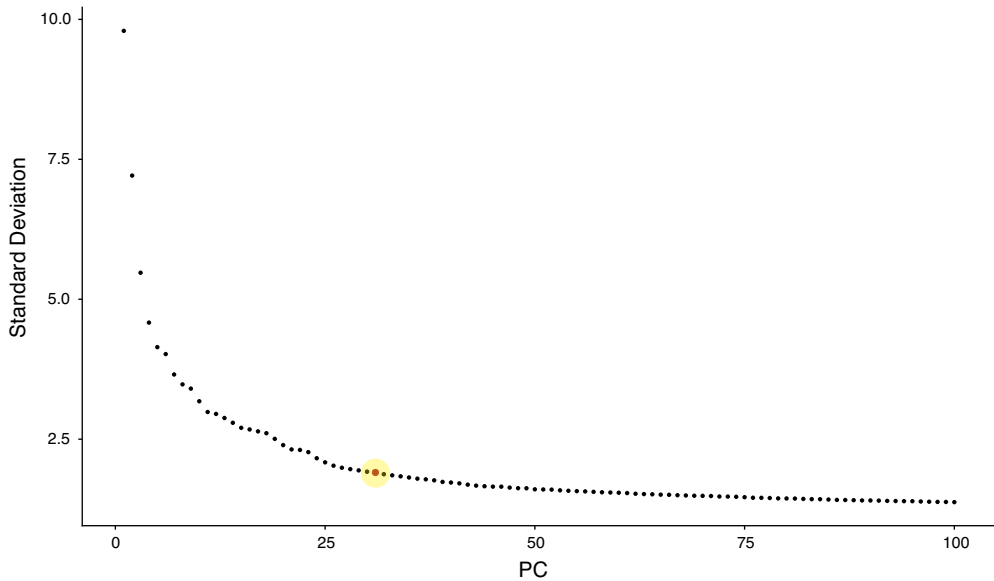

Supplement: supp [file elife-50354-supp-v1.zip › elife_poa_e50354_Supplementary_file_3.pdf]

Figure 2 - Figure supplement 1

A

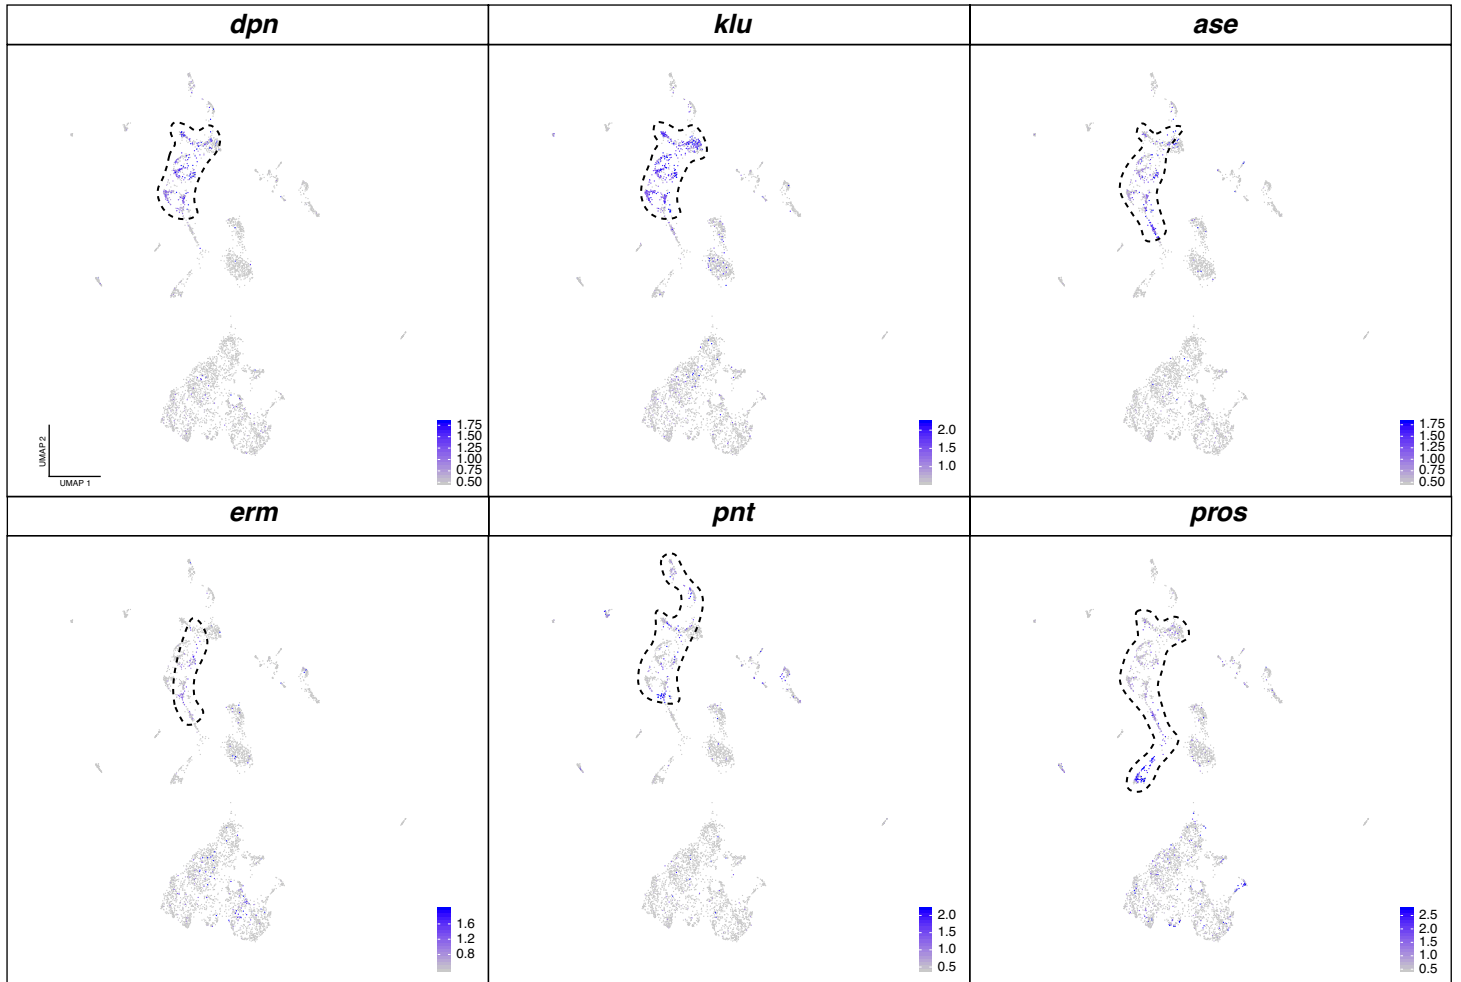

B

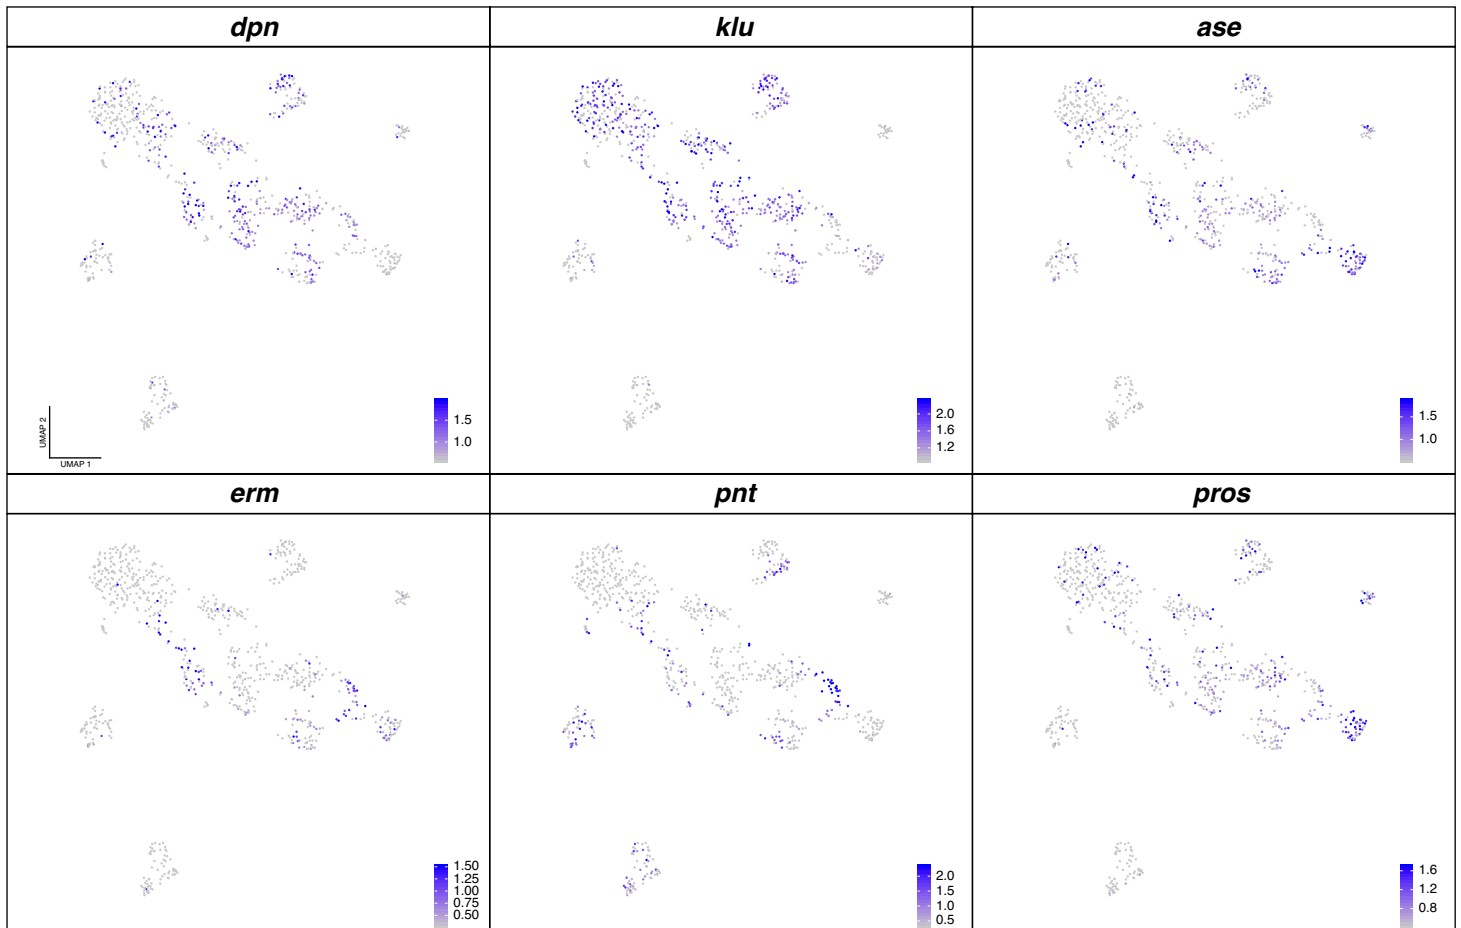

Supplement: supp [file elife-50354-supp-v1.zip › elife_poa_e50354_Figure_2_figure_supplement_1.pdf]

Figure 8 - Figure supplement 1

A

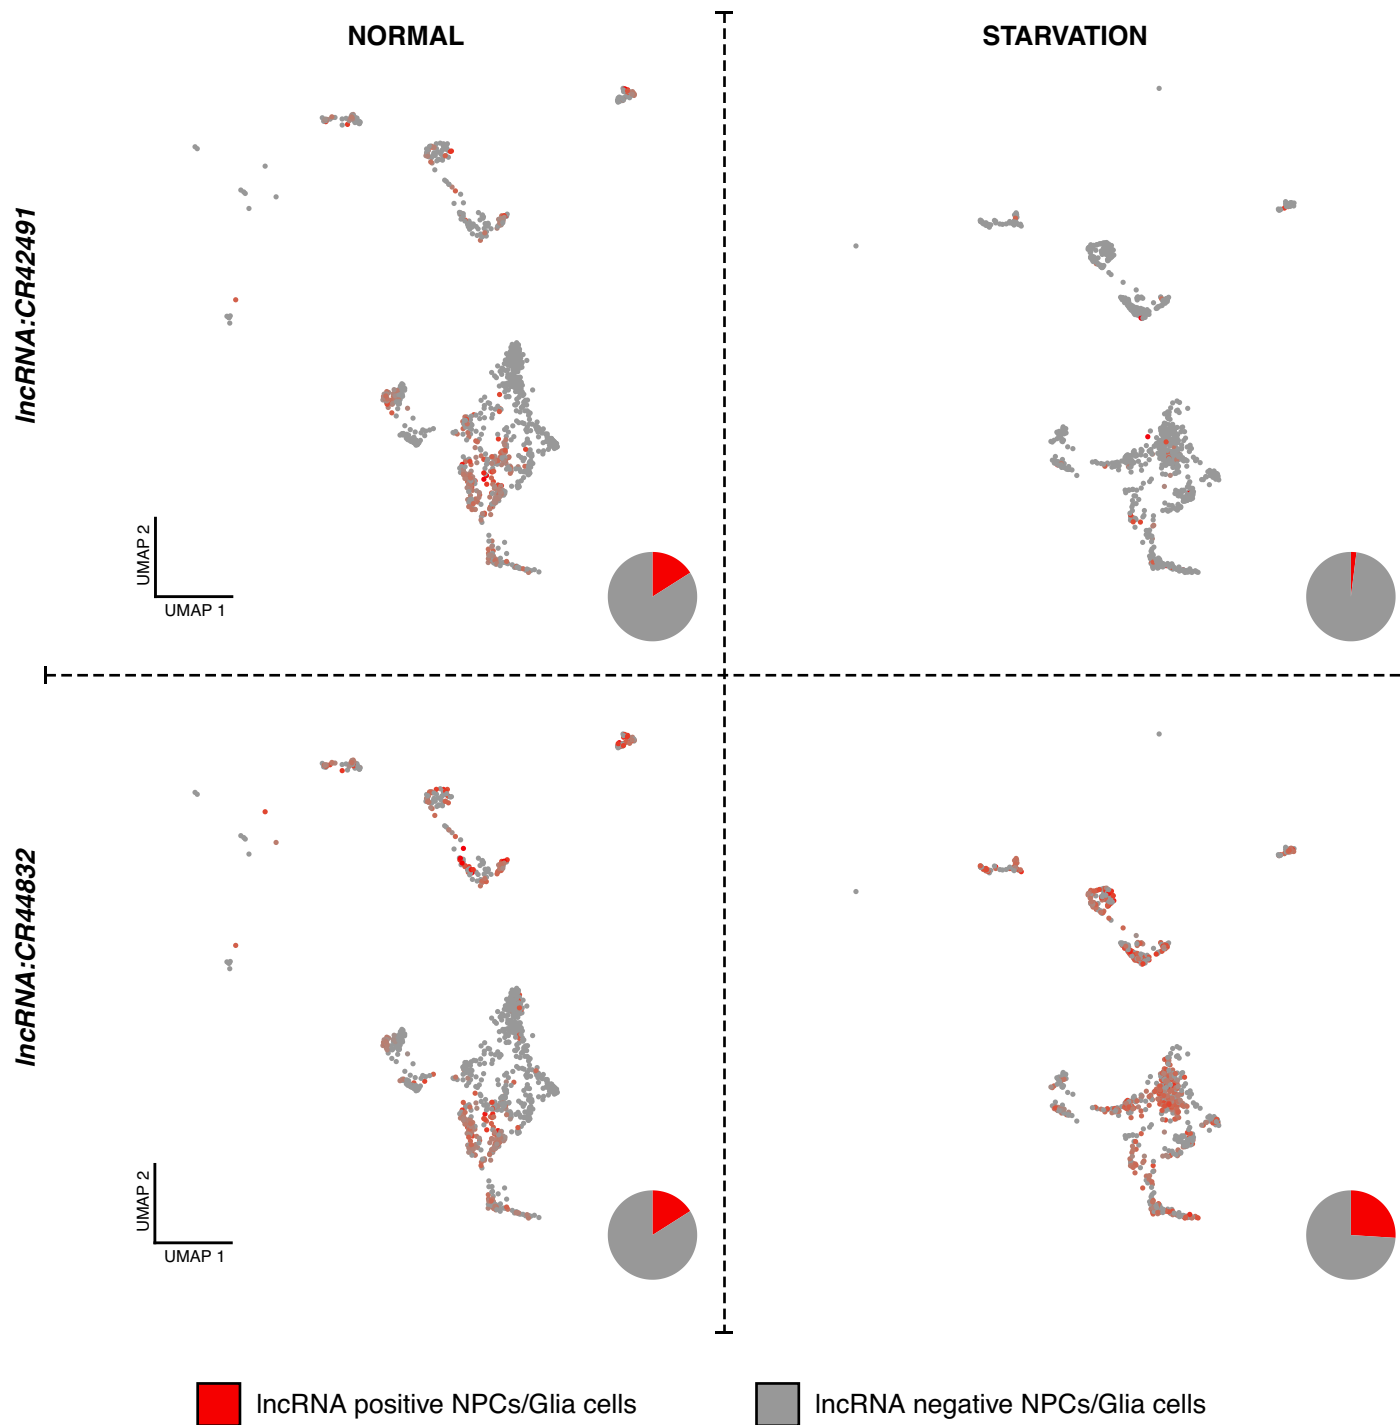

Supplement: supp [file elife-50354-supp-v1.zip › elife_poa_e50354_Figure_8_figure_supplement_1.pdf]

**A**

Initial UMAP plot

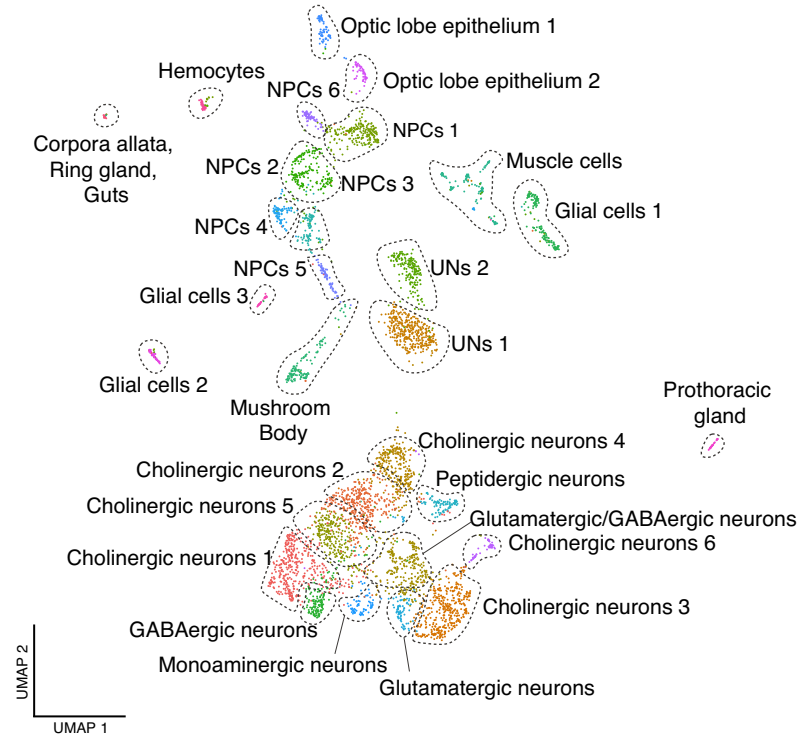

Simplified UMAP plot

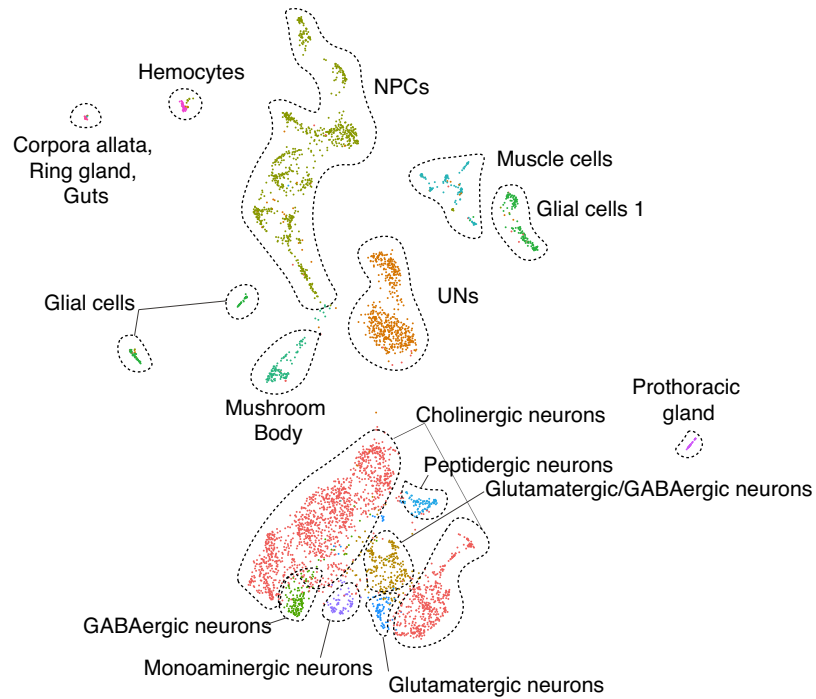

**B**

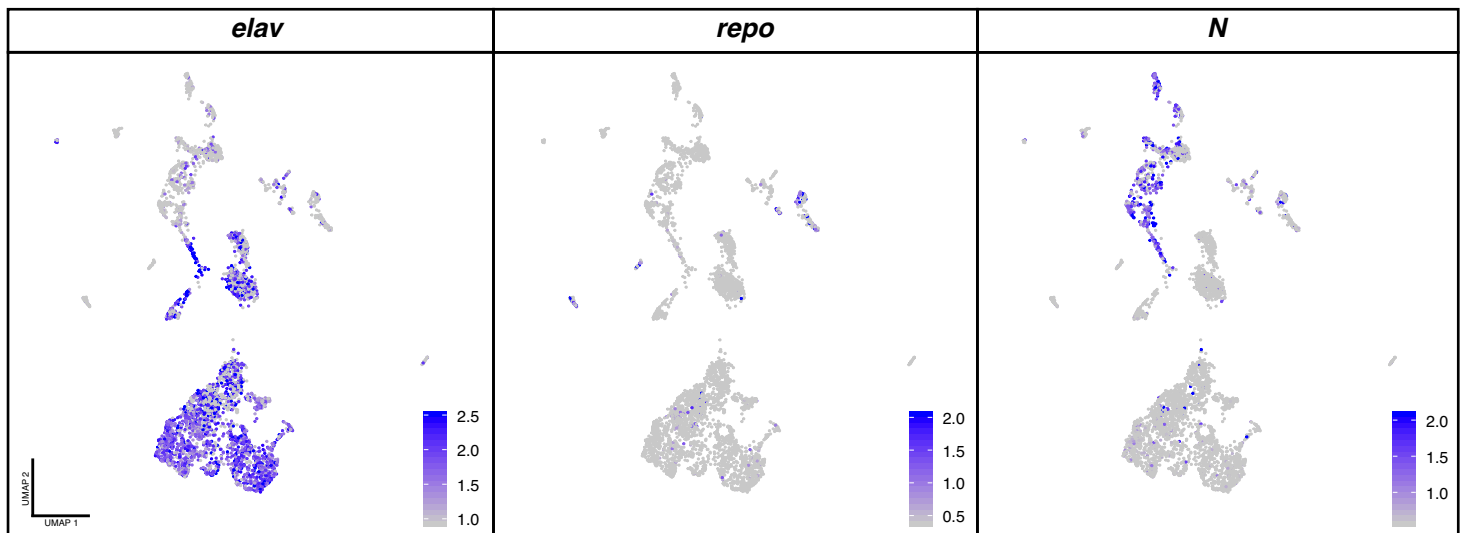

Supplement: supp [file elife-50354-supp-v1.zip › elife_poa_e50354_Figure_1_figure_supplement_1.pdf]

# Figure 3 - Figure supplement 2

**A**

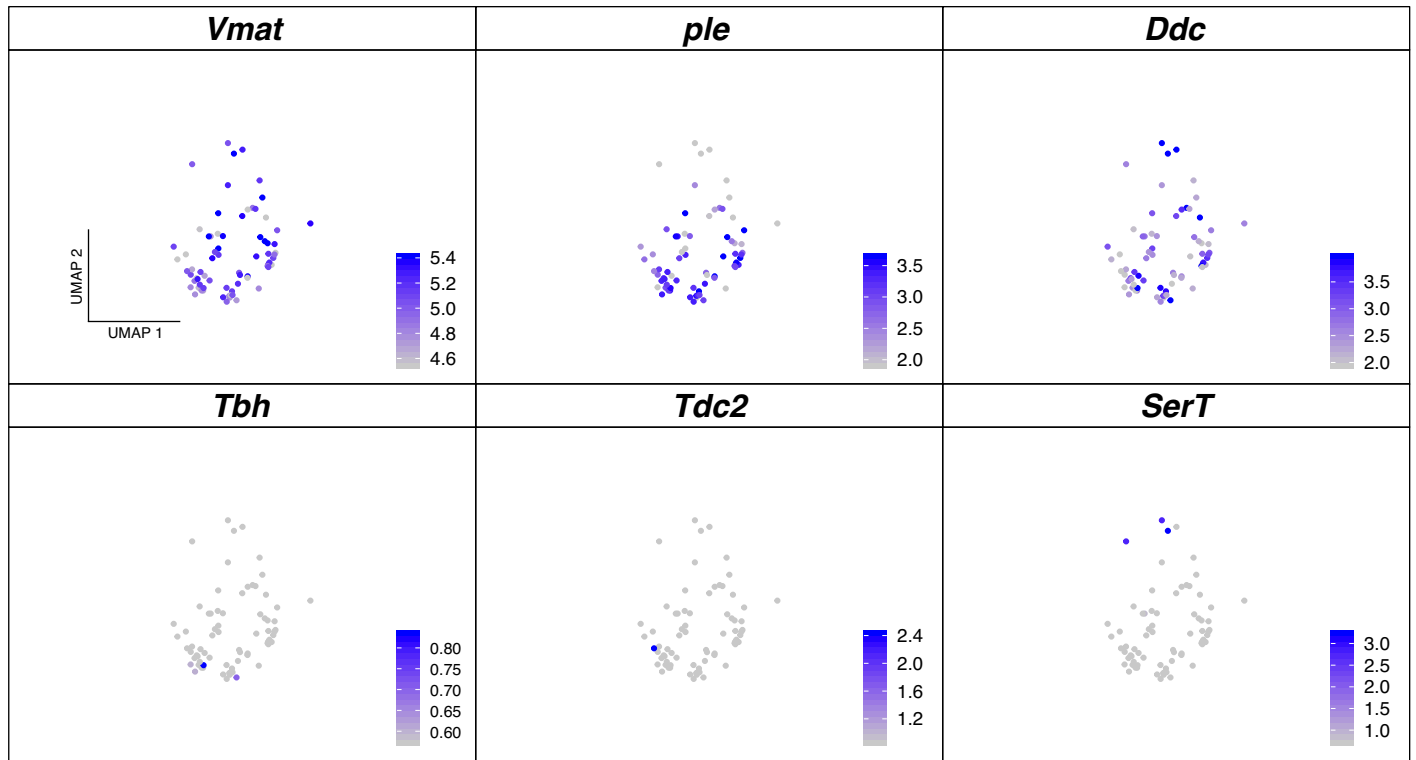

**B**

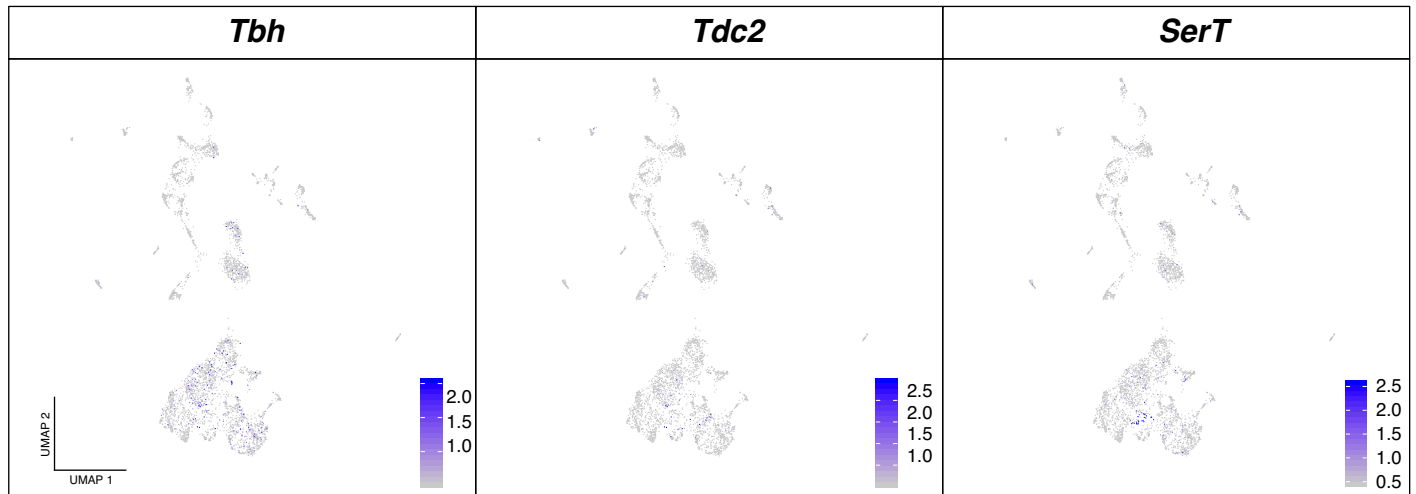

Supplement: supp [file elife-50354-supp-v1.zip › elife_poa_e50354_Figure_3_figure_supplement_2.pdf]

Figure 1 - Figure supplement 2

A

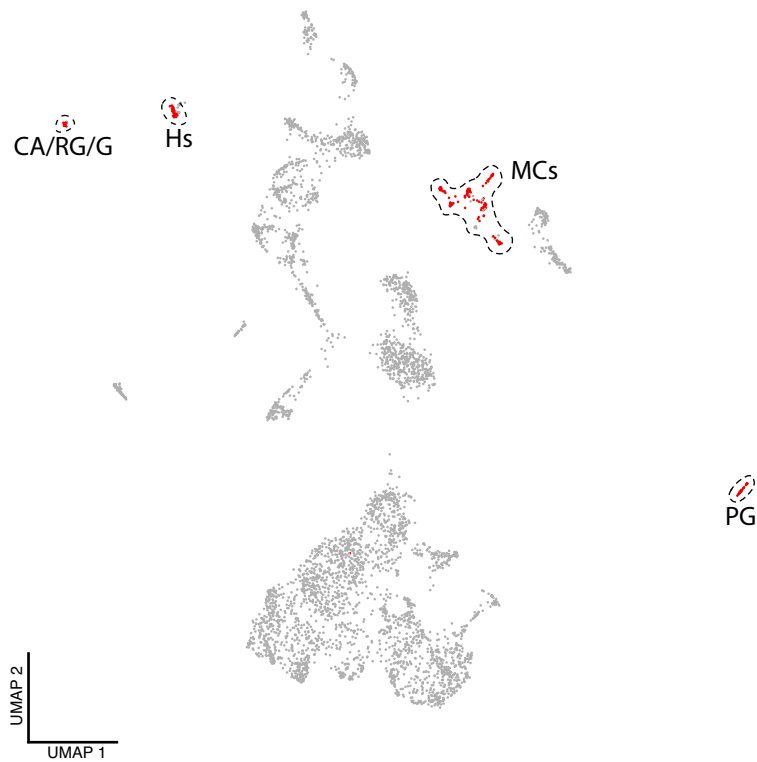

Supplement: supp [file elife-50354-supp-v1.zip › elife_poa_e50354_Figure_1_figure_supplement_2.pdf]

Figure 2 - Figure supplement 2

A

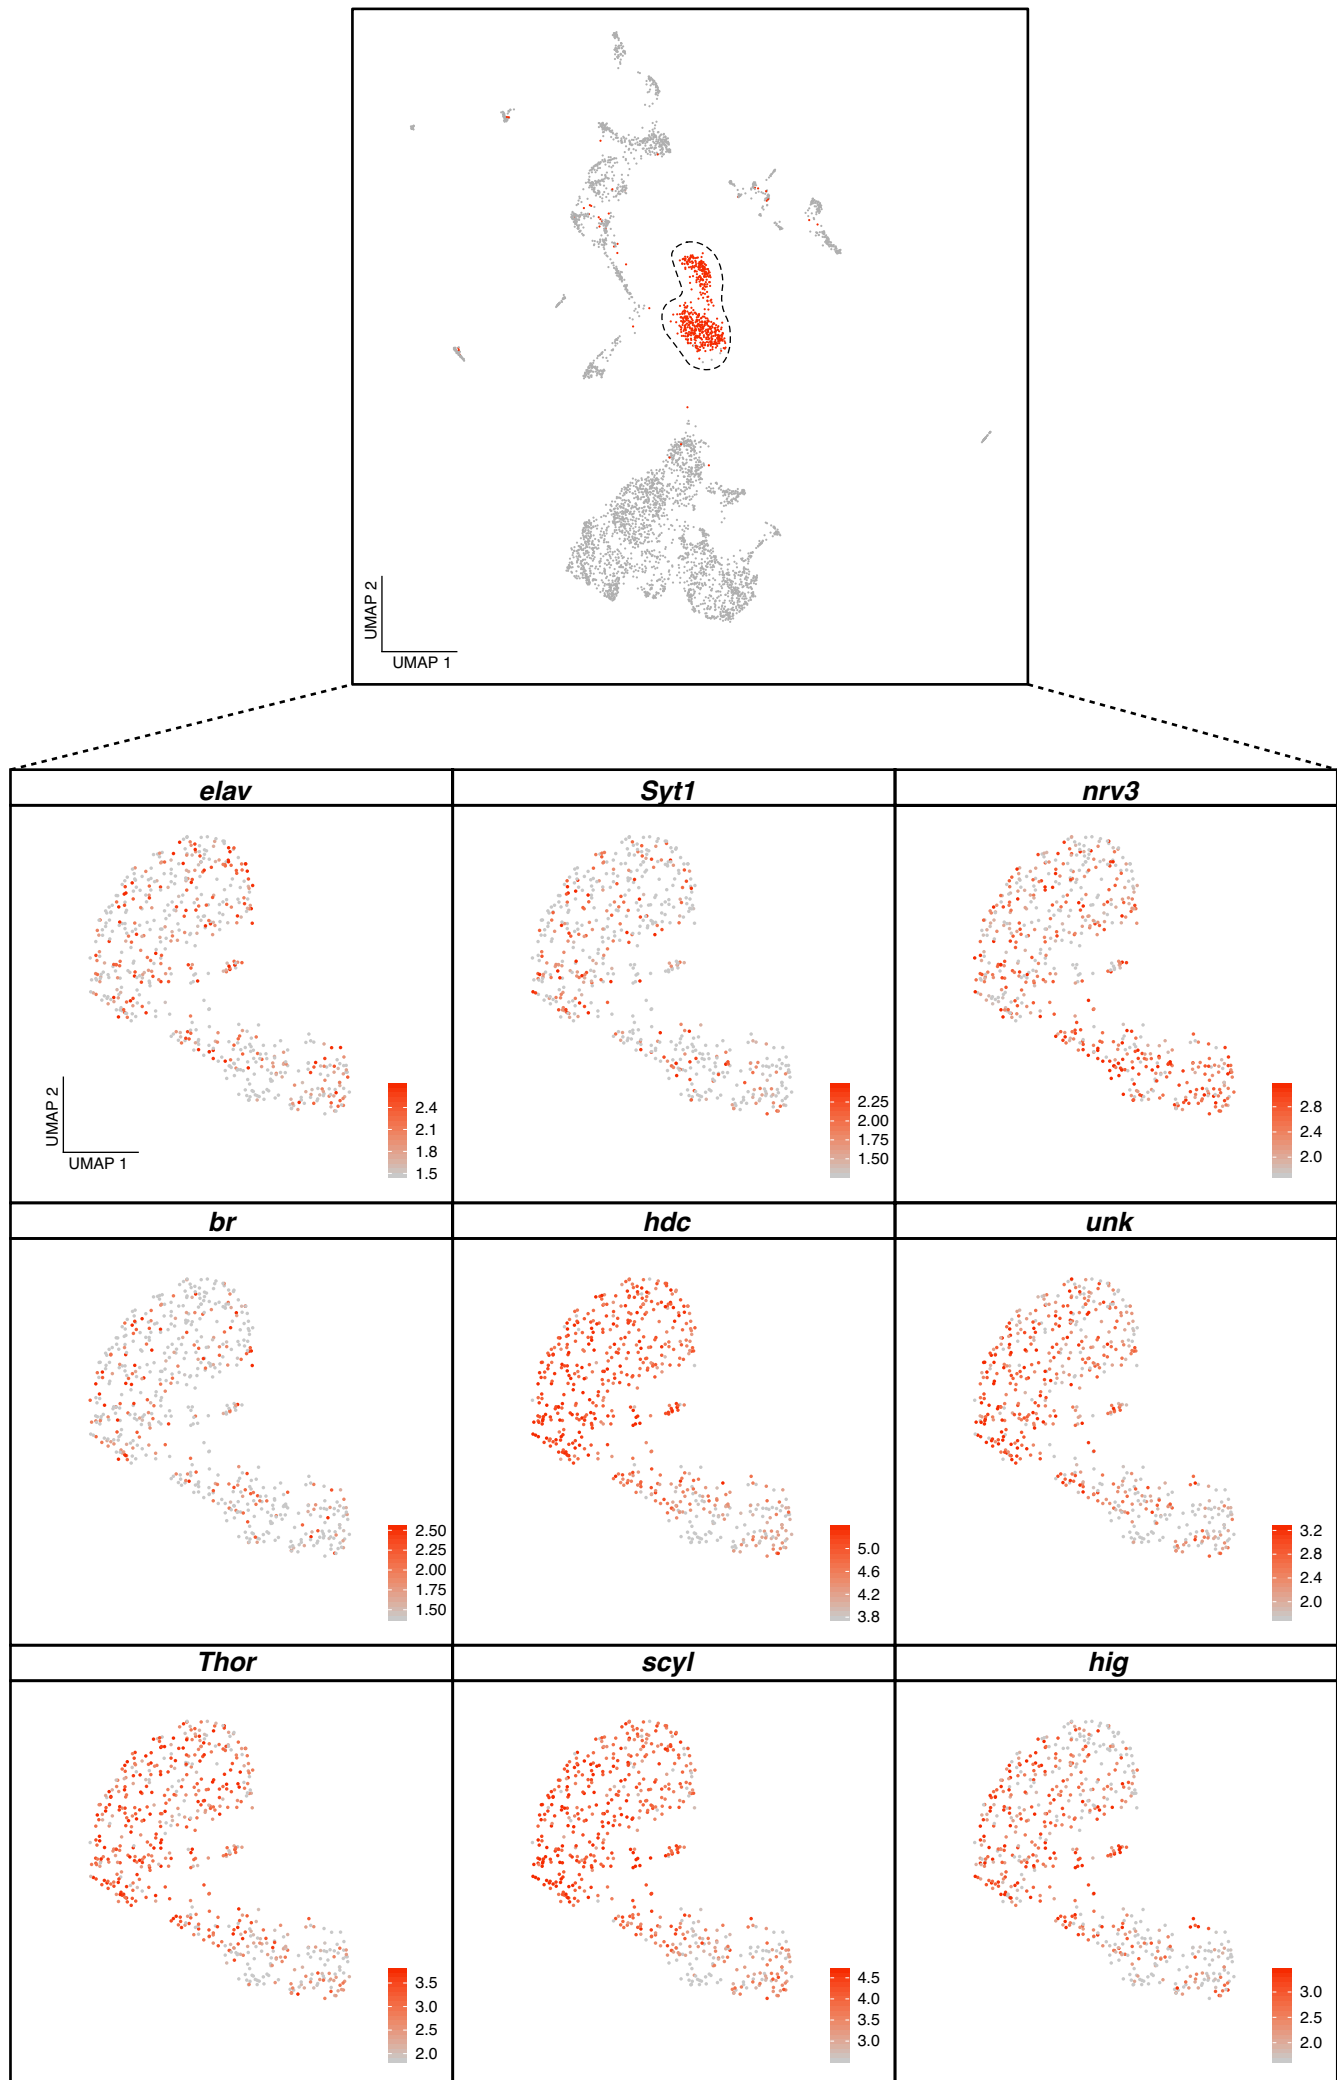

Supplement: supp [file elife-50354-supp-v1.zip › elife_poa_e50354_Figure_2_figure_supplement_2.pdf]

# Figure 7 - Figure supplement 1

**A**

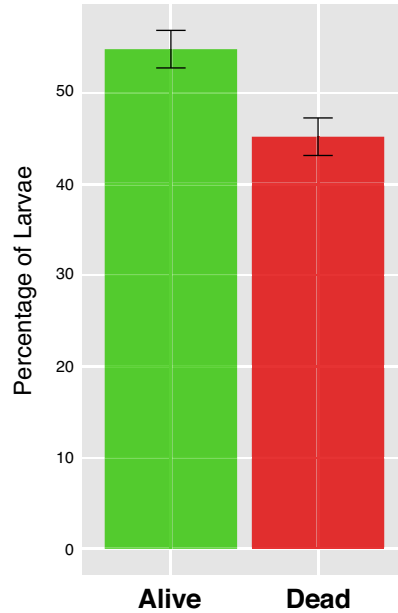

Supplement: supp [file elife-50354-supp-v1.zip › elife_poa_e50354_Figure_7_figure_supplement_1.pdf]

**A**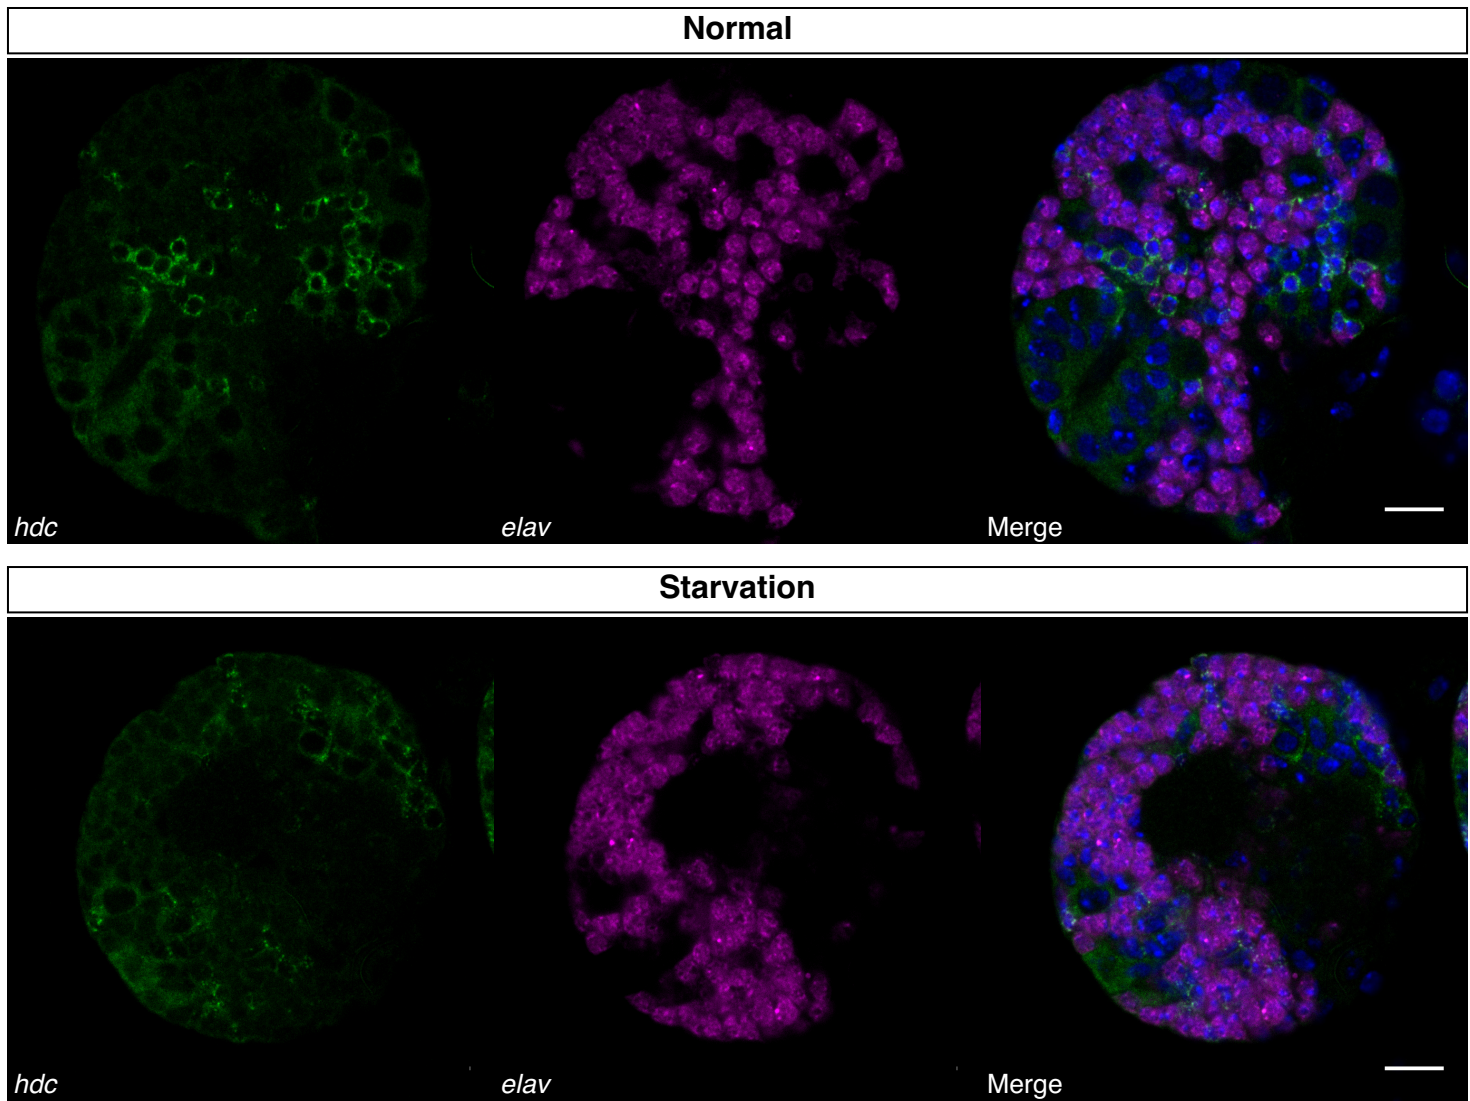**B**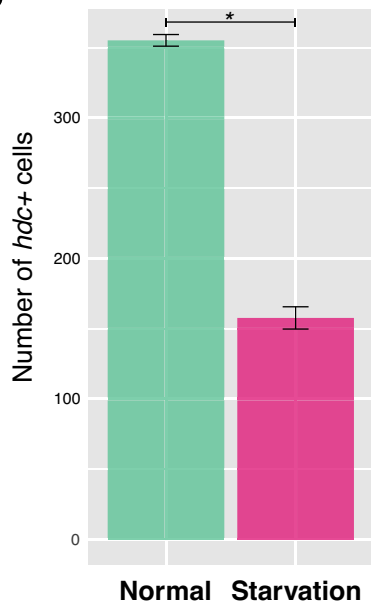

Supplement: supp [file elife-50354-supp-v1.zip › elife_poa_e50354_Figure_7_figure_supplement_2.pdf]
